# Supplementary material for: The molecular basis of coupling between poly(A)-tail length and translational efficiency
Source: eLife. 2021 Jul 2;10:e66493. doi: 10.7554/eLife.66493 (PMC8253595; doi:10.7554/eLife.66493)
Supplement: Figure 1—source data 1. [file elife-66493-fig1-data1.xlsx]

## Sheet: Figure 1
Source data for luciferase values shown in Figure 1 and Figure 1—figure supplement 2.
Figure 1B
	Oocyte extract						Rabbit reticulocyte lysate
	Taill length	Replicate	Fluc	Nluc	Nluc/Fluc		Taill length	Replicate	Fluc	Nluc	Nluc/Fluc
	Short tail	1	923526	1106449	1.19807		Short tail	1	153300	938337	6.12092
	Short tail	2	937695	1120642	1.1951		Short tail	2	150757	926634	6.14654
	Short tail	3	980151	1170279	1.19398		Short tail	3	153502	925035	6.02621
	Long tail	1	1013936	34122184	33.6532		Long tail	1	155201	1486807	9.57988
	Long tail	2	1065224	35214008	33.0578		Long tail	2	153122	1454878	9.50143
	Long tail	3	1078951	32583424	30.1992		Long tail	3	154571	1490431	9.64237
Figure 1C
	Group	Replicate	Taill length	Fluc	Nluc	Nluc/Fluc*2
	Buffer	1	Short tail	327585	267093	1.63068
	Buffer	2	Short tail	327623	259224	1.58245
	Buffer	3	Short tail	302235	239564	1.58528
	Buffer	1	Long tail	319584	22099596	138.302
	Buffer	2	Long tail	317081	22321436	140.793
	Buffer	3	Long tail	311557	22667180	145.509
	eGFP (600ng)	1	Short tail	313926	232801	1.48316
	eGFP (600ng)	2	Short tail	306253	231608	1.51253
	eGFP (600ng)	3	Short tail	292285	216484	1.48132
	eGFP (600ng)	1	Long tail	301508	21436746	142.197
	eGFP (600ng)	2	Long tail	299117	21701808	145.106
	eGFP (600ng)	3	Long tail	291138	21304418	146.353
	PABPC1 (120ng)	1	Short tail	300931	1234121	8.20202
	PABPC1 (120ng)	2	Short tail	304194	1363964	8.96772
	PABPC1 (120ng)	3	Short tail	301855	1326911	8.79171
	PABPC1 (120ng)	1	Long tail	453928	34799792	153.327
	PABPC1 (120ng)	2	Long tail	486051	37469096	154.178
	PABPC1 (120ng)	3	Long tail	431686	33359482	154.554
	PABPC1 (600ng)	1	Short tail	183600	1439403	15.6798
	PABPC1 (600ng)	2	Short tail	175434	1240832	14.1459
	PABPC1 (600ng)	3	Short tail	180059	1276256	14.176
	PABPC1 (600ng)	1	Long tail	212264	16168058	152.339
	PABPC1 (600ng)	2	Long tail	199974	16034701	160.368
	PABPC1 (600ng)	3	Long tail	209023	15070617	144.201
Figure 1E
	Group	Replicate	Taill length	Fluc	Nluc	Nluc/Fluc
	Water	1	Short tail	96249	207623	2.15714
	Water	2	Short tail	184422	350564	1.90088
	Water	3	Short tail	132329	295208	2.23086
	Water	1	Long tail	140634	10527107	74.8546
	Water	2	Long tail	149915	8492700	56.6501
	Water	3	Long tail	139305	12133254	87.0985
	eGFP (1 fmol)	1	Short tail	256012	453226	1.77033
	eGFP (1 fmol)	2	Short tail	222353	403501	1.81469
	eGFP (1 fmol)	3	Short tail	225228	340316	1.51098
	eGFP (1 fmol)	1	Long tail	86181	5862134	68.0212
	eGFP (1 fmol)	2	Long tail	179424	8023356	44.7173
	eGFP (1 fmol)	3	Long tail	180294	7943874	44.0607
	PABPC1 (0.5 fmol)	1	Short tail	78631	651186	8.28154
	PABPC1 (0.5 fmol)	2	Short tail	81476	777163	9.53855
	PABPC1 (0.5 fmol)	3	Short tail	72614	650363	8.95644
	PABPC1 (0.5 fmol)	1	Long tail	109929	9119281	82.9561
	PABPC1 (0.5 fmol)	2	Long tail	71292	7570743	106.193
	PABPC1 (0.5 fmol)	3	Long tail	114002	8710749	76.4087
	PABPC1 (1 fmol)	1	Short tail	59272	782015	13.1937
	PABPC1 (1 fmol)	2	Short tail	63651	711897	11.1844
	PABPC1 (1 fmol)	3	Short tail	59030	663487	11.2398
	PABPC1 (1 fmol)	1	Long tail	69885	6872321	98.3376
	PABPC1 (1 fmol)	2	Long tail	67197	6487015	96.5373
	PABPC1 (1 fmol)	3	Long tail	102649	7809942	76.084
	PABPC1 M161A (1 fmol)	1	Short tail	128736	271603	2.10977
	PABPC1 M161A (1 fmol)	2	Short tail	138068	260649	1.88783
	PABPC1 M161A (1 fmol)	3	Short tail	152781	334604	2.19009
	PABPC1 M161A (1 fmol)	1	Long tail	189150	3722512	19.6802
	PABPC1 M161A (1 fmol)	2	Long tail	187519	4139550	22.0754
	PABPC1 M161A (1 fmol)	3	Long tail	166533	3265253	19.6072
Figure 1F
	Group	Replicate	3'-end	Luc signal	Plotted value (scaled within each group)
	eGFP	1	A29	378303	1.44311
	eGFP	2	A29	457139	1.74385
	eGFP	3	A29	399316	1.52327
	PABPC1	1	A29	2159641	8.23838
	PABPC1	2	A29	1266962	4.83308
	PABPC1	3	A29	1695214	6.46673
	eGFP	1	A139	17466286	8.32857
	eGFP	2	A139	17368526	8.28196
	eGFP	3	A139	18177336	8.66763
	PABPC1	1	A139	17675670	8.42842
	PABPC1	2	A139	18153172	8.65611
	PABPC1	3	A139	16138413	7.69539
	eGFP	1	stem loop	615352	4.69476
	eGFP	2	stem loop	630566	4.81084
	eGFP	3	stem loop	791594	6.03938
	PABPC1	1	stem loop	587839	4.48486
	PABPC1	2	stem loop	530696	4.04889
	PABPC1	3	stem loop	728418	5.55739
	eGFP	1	Malat1	357180	5.45013
	eGFP	2	Malat1	285236	4.35236
	eGFP	3	Malat1	387651	5.91508
	PABPC1	1	Malat1	319548	4.87592
	PABPC1	2	Malat1	361698	5.51907
	PABPC1	3	Malat1	367001	5.59999
Figure 1—figure supplement 2A
	Oocyte extract					Rabbit reticulocyte lysate
	Taill length	Fluc	Rluc	Rluc/Fluc*10		Taill length	Fluc	Rluc	Rluc/Fluc*10
	Short tail	11141603	2493687	2.23818		Short tail	843678	2183177	25.8769
	Long tail	10694269	35687328	33.3705		Long tail	844351	2664341	31.5549
Figure 1—figure supplement 2B
	Group	Replicate	Taill length	Fluc	Rluc	Rluc/Fluc*2
	Water	1	Short tail	448542	309149	1.37846
	Water	2	Short tail	287841	210542	1.4629
	Water	3	Short tail	557445	386171	1.3855
	Water	1	Long tail	510907	3929302	15.3817
	Water	2	Long tail	386534	3166774	16.3855
	Water	3	Long tail	290519	3189056	21.9542
	PABPC1 (0.5 fmol)	1	Short tail	366700	579899	3.1628
	PABPC1 (0.5 fmol)	2	Short tail	322652	462620	2.86761
	PABPC1 (0.5 fmol)	3	Short tail	270058	494119	3.65935
	PABPC1 (0.5 fmol)	1	Long tail	191208	2334278	24.4161
	PABPC1 (0.5 fmol)	2	Long tail	190115	2167213	22.799
	PABPC1 (0.5 fmol)	3	Long tail	183927	2557357	27.8084
	PABPC1 (2 fmol)	1	Short tail	160278	601866	7.51028
	PABPC1 (2 fmol)	2	Short tail	217399	626939	5.76763
	PABPC1 (2 fmol)	3	Short tail	273832	785647	5.73817
	PABPC1 (2 fmol)	1	Long tail	189909	2313298	24.3622
	PABPC1 (2 fmol)	2	Long tail	170064	2139853	25.1653
	PABPC1 (2 fmol)	3	Long tail	167327	2342391	27.9978
	ePAB (0.5 fmol)	1	Short tail	388721	769460	3.95893
	ePAB (0.5 fmol)	2	Short tail	264865	595728	4.49835
	ePAB (0.5 fmol)	3	Short tail	244398	549104	4.49352
	ePAB (0.5 fmol)	1	Long tail	261673	2472447	18.8972
	ePAB (0.5 fmol)	2	Long tail	240112	2444139	20.3583
	ePAB (0.5 fmol)	3	Long tail	326824	2593811	15.8728
	ePAB (2 fmol)	1	Short tail	251517	703706	5.59569
	ePAB (2 fmol)	2	Short tail	415410	971066	4.67522
	ePAB (2 fmol)	3	Short tail	263435	723929	5.49607
	ePAB (2 fmol)	1	Long tail	268151	1993348	14.8674
	ePAB (2 fmol)	2	Long tail	223876	2145155	19.1638
	ePAB (2 fmol)	3	Long tail	308160	2305487	14.9629
Figure 1—figure supplement 2C
	Group	Replicate	Taill length	Fluc	Nluc	Nluc/Fluc*2
	Water	1	Short tail	380989	860086	4.51502
	Water	2	Short tail	298712	746163	4.99587
	Water	3	Short tail	324528	748458	4.61259
	Water	1	Long tail	335487	13231047	78.8767
	Water	2	Long tail	217606	12691507	116.647
	Water	3	Long tail	236258	11486180	97.2342
	eGFP (1.2 fmol)	1	Short tail	673001	673911	2.0027
	eGFP (1.2 fmol)	2	Short tail	562760	602746	2.14211
	eGFP (1.2 fmol)	3	Short tail	258396	433768	3.35739
	eGFP (1.2 fmol)	1	Long tail	275676	11501103	83.4393
	eGFP (1.2 fmol)	2	Long tail	276296	8422643	60.9683
	eGFP (1.2 fmol)	3	Long tail	373620	12599542	67.4458
	PABPC1 (0.6 fmol)	1	Short tail	158874	1122136	14.1261
	PABPC1 (0.6 fmol)	2	Short tail	214332	1421371	13.2633
	PABPC1 (0.6 fmol)	3	Short tail	196566	1677234	17.0654
	PABPC1 (0.6 fmol)	1	Long tail	164871	8059701	97.7698
	PABPC1 (0.6 fmol)	2	Long tail	84160	6412847	152.397
	PABPC1 (0.6 fmol)	3	Long tail	143368	10653625	148.619
	PABPC1 (1.2 fmol)	1	Short tail	170396	1777672	20.8652
	PABPC1 (1.2 fmol)	2	Short tail	175103	1600262	18.278
	PABPC1 (1.2 fmol)	3	Short tail	155310	1309335	16.8609
	PABPC1 (1.2 fmol)	1	Long tail	226533	12784879	112.874
	PABPC1 (1.2 fmol)	2	Long tail	130383	10080302	154.626
	PABPC1 (1.2 fmol)	3	Long tail	139304	8665166	124.407
	PABPC1+eIF4G	1	Short tail	324745	3693868	22.7493
	PABPC1+eIF4G	2	Short tail	296820	3722368	25.0817
	PABPC1+eIF4G	3	Short tail	307648	3468482	22.5484
	PABPC1+eIF4G	1	Long tail	408100	12365960	60.6026
	PABPC1+eIF4G	2	Long tail	269767	12342149	91.5023
	PABPC1+eIF4G	3	Long tail	324691	14335432	88.302
