# Supplementary material for: The molecular basis of coupling between poly(A)-tail length and translational efficiency
Source: eLife. 2021 Jul 2;10:e66493. doi: 10.7554/eLife.66493 (PMC8253595; doi:10.7554/eLife.66493)
Supplement: Figure 2—source data 1. [file elife-66493-fig2-data1.xlsx]

## Sheet: Figure 2
Source data for values shown in Figure 2D.
	Replicate	Lane	Group	S35 signal top region (raw)	S35 signal bottom region (raw)	S35 signal top region (relative)	S35 signal bottom region (relative)	S35 signal total (relative)	Total protein (raw)	Total protein (relative)	Final (relative)
	1	2	Water	9.62117e+06	1.10902e+07	1	1	1	1774340879	1	1
	1	3	eGFP	9.30392e+06	1.10803e+07	0.967026	0.999104	0.983065	1845032046	1.03984	0.9454
	1	4	PABPC1	5.15723e+07	63641273	5.3603	5.73849	5.54939	1661892246	0.936625	5.92488
	2	2	Water	1.159e+07	1.22198e+07	1	1	1	1528340327	1	1
	2	3	eGFP	9.46203e+06	8.98556e+06	0.816399	0.735326	0.78	1564979532	1.02397	0.761739
	2	4	PABPC1	4.20569e+07	4.85937e+07	3.62873	3.97663	3.8	1584766038	1.03692	3.6647
	3	2	Water	1.03713e+07	1.10756e+07	1	1	1	1690749327	1	1
	3	3	eGFP	8.30538e+06	9.05176e+06	0.800804	0.817272	0.81	1639724550	0.969821	0.835205
	3	4	PABPC1	3.84328e+07	4.60048e+07	3.70569	4.15371	3.93	1696676361	1.00351	3.91627
