# Supplementary material for: The molecular basis of coupling between poly(A)-tail length and translational efficiency
Source: eLife. 2021 Jul 2;10:e66493. doi: 10.7554/eLife.66493 (PMC8253595; doi:10.7554/eLife.66493)
Supplement: Figure 4—figure supplement 3—source data 1. [file elife-66493-fig4-figsupp3-data1.xlsx]

## Sheet: mRNA half life
Source data for mRNA half-life values shown in Figure 4—figure supplement 3B–C.
gene_id	siControl (h)	siPABPC1 (h)	siPABPC1&4 (h)
ENSG00000000003.14	14.5372	9.18319	3.67031
ENSG00000000419.12	6.61339	3.92828	3.00997
ENSG00000000457.13	0.380348	0.762483	0.840166
ENSG00000000460.16	10.9809	12.0837	9.61139
ENSG00000000971.15	19.2449	22.2488	13.831
ENSG00000001036.13	18.9291	13.3177	4.95884
ENSG00000001084.10	6.133	5.6416	5.48099
ENSG00000001167.14	2.70178	2.22498	2.15435
ENSG00000001460.17	2.96373	2.62979	3.03452
ENSG00000001461.16	16.3383	15.7456	5.6592
ENSG00000001497.16	18.8416	16.5523	11.0961
ENSG00000001617.11	10.8996	14.5843	5.9866
ENSG00000001629.9	8.85783	7.85415	7.53804
ENSG00000001630.15	5.26517	4.08656	2.64978
ENSG00000001631.15	9.18287	9.26636	8.71646
ENSG00000002016.17	4.61768	6.6881	3.57289
ENSG00000002330.13	13.8249	8.91585	2.53836
ENSG00000002549.12	10.0742	8.59601	4.48925
ENSG00000002822.15	7.82966	8.99081	9.26064
ENSG00000002834.17	7.65415	4.69861	2.28474
ENSG00000002919.14	1.68159	1.56578	1.3152
ENSG00000003056.7	8.46967	6.9793	4.5393
ENSG00000003096.13	5.0815	5.13445	3.42015
ENSG00000003137.8	2.03657	3.82063	3.09448
ENSG00000003393.14	3.13026	4.92268	4.22728
ENSG00000003402.19	4.39088	3.71743	3.463
ENSG00000003436.14	9.43386	5.98357	3.25873
ENSG00000003509.15	6.24231	6.66986	3.83282
ENSG00000003756.16	3.86758	3.89693	3.68589
ENSG00000003989.16	4.18601	6.05079	4.10778
ENSG00000004059.10	22.167	15.9323	6.08524
ENSG00000004139.13	6.14238	4.70552	3.50572
ENSG00000004142.11	12.7584	8.93106	4.54848
ENSG00000004399.12	22.4051	13.424	7.21431
ENSG00000004455.16	12.4608	11.5093	6.1059
ENSG00000004478.7	12.2933	12.0144	7.7731
ENSG00000004487.15	11.5516	9.93551	8.93588
ENSG00000004534.14	10.3736	9.85282	7.98544
ENSG00000004660.14	2.86647	2.94356	1.41847
ENSG00000004700.15	8.6989	9.93626	5.35928
ENSG00000004766.15	8.04801	7.84501	7.89648
ENSG00000004779.9	10.5918	9.76599	5.21581
ENSG00000004799.7	1.85988	2.03233	1.86931
ENSG00000004864.13	9.48043	7.79602	3.46156
ENSG00000004866.19	7.0522	5.22331	4.16633
ENSG00000004897.11	7.42394	6.47472	4.68078
ENSG00000004961.14	3.48591	3.53851	2.4825
ENSG00000004975.11	13.6746	13.7503	11.4496
ENSG00000005007.12	4.94632	4.44387	1.49013
ENSG00000005020.12	12.1088	5.36536	4.67457
ENSG00000005022.5	11.4679	8.4616	3.77157
ENSG00000005059.15	12.383	9.59172	3.97205
ENSG00000005073.5	1.18743	1.49234	1.50192
ENSG00000005100.12	6.70934	6.45498	5.55329
ENSG00000005156.11	15.9882	12.0774	9.65182
ENSG00000005175.9	5.78077	6.33771	6.23289
ENSG00000005189.19	8.61441	5.44721	4.22151
ENSG00000005194.14	6.79399	6.61701	4.73028
ENSG00000005249.12	7.0985	5.12009	3.88339
ENSG00000005302.17	14.6607	8.52139	6.59097
ENSG00000005339.14	5.91908	5.16712	4.01414
ENSG00000005436.13	6.64023	5.1724	3.38053
ENSG00000005469.11	15.4674	7.45868	11.2171
ENSG00000005483.20	2.84638	3.19279	2.87169
ENSG00000005486.16	12.9574	9.12534	1.35026
ENSG00000005700.14	5.81754	5.39484	5.96126
ENSG00000005801.16	2.58638	2.49782	2.6696
ENSG00000005810.17	11.1641	8.58346	6.68714
ENSG00000005812.10	1.34176	1.35308	1.39156
ENSG00000005882.11	21.057	25.2702	19.9661
ENSG00000005884.17	13.3329	5.78153	2.45134
ENSG00000005889.15	1.78529	2.45202	2.28642
ENSG00000005893.15	18.4225	11.5932	4.09487
ENSG00000006007.11	9.98833	6.97261	2.76533
ENSG00000006015.17	139.022	60.0726	20.7632
ENSG00000006016.10	37.6019	28.2295	13.1329
ENSG00000006062.13	0.420509	0.546904	0.438523
ENSG00000006118.14	48.8689	68.3703	18.3158
ENSG00000006125.16	19.5077	12.7139	5.57722
ENSG00000006194.9	1.20813	1.24957	1.44213
ENSG00000006282.20	39.0276	28.6656	16.5052
ENSG00000006327.13	1.84882	1.94543	1.41259
ENSG00000006432.15	4.56493	2.17088	2.27737
ENSG00000006451.7	4.27852	3.1392	2.65354
ENSG00000006453.13	7.29739	6.7021	5.33649
ENSG00000006459.10	0.476546	0.67536	0.829817
ENSG00000006468.13	5.38158	5.16062	4.8912
ENSG00000006530.15	10.0697	8.13922	7.00666
ENSG00000006534.15	35.2327	20.9957	10.7785
ENSG00000006576.16	9.5727	7.62416	5.63586
ENSG00000006607.13	10.8861	7.99656	6.27946
ENSG00000006625.17	9.66012	5.63439	3.39422
ENSG00000006634.7	3.10929	2.77843	2.25963
ENSG00000006638.11	19.0022	4.26195	0.877157
ENSG00000006652.13	3.66215	1.66095	0.568067
ENSG00000006695.10	2.79138	2.78639	2.33927
ENSG00000006704.10	5.44943	4.31144	4.91356
ENSG00000006712.14	7.10444	5.9918	5.24222
ENSG00000006715.15	13.6337	12.571	9.43328
ENSG00000006740.16	12.4574	10.3055	5.09643
ENSG00000006744.18	11.5644	10.3968	8.3058
ENSG00000006757.11	14.5354	12.4249	5.56362
ENSG00000006831.9	4.50434	4.05893	3.72243
ENSG00000007038.10	45.4969	26.5668	12.366
ENSG00000007047.14	9.92196	9.01346	8.70171
ENSG00000007080.10	21.1372	16.8066	6.70208
ENSG00000007168.12	4.6112	4.61048	4.45556
ENSG00000007202.14	34.8311	25.2404	11.694
ENSG00000007341.18	7.3302	3.20788	2.88494
ENSG00000007372.20	2.30314	2.97552	3.25893
ENSG00000007376.7	9.64798	9.12851	6.66845
ENSG00000007384.15	20.7938	15.7223	16.8814
ENSG00000007392.16	6.91364	5.62438	5.35866
ENSG00000007520.3	14.6894	10.8345	6.95814
ENSG00000007541.16	61.8833	22.0108	13.7586
ENSG00000007545.15	2.46098	2.43424	2.73343
ENSG00000007866.18	8.61345	6.45491	6.79192
ENSG00000007923.15	13.3924	10.5808	9.21893
ENSG00000007944.14	0.441341	0.204114	0.30332
ENSG00000008018.8	13.1477	11.1599	6.54173
ENSG00000008083.13	1.73341	1.67106	1.32083
ENSG00000008086.11	1.37743	1.72977	3.15515
ENSG00000008130.15	12.4229	9.10579	5.69758
ENSG00000008256.15	4.75146	3.92867	3.36517
ENSG00000008282.8	7.328	7.37499	3.53972
ENSG00000008283.15	10.8189	8.95301	5.55052
ENSG00000008294.20	8.98481	8.40489	6.49558
ENSG00000008300.15	11.2439	6.94382	7.89612
ENSG00000008324.10	1.99179	1.37905	0.606301
ENSG00000008394.12	14.6866	10.3871	4.53057
ENSG00000008405.11	6.9993	6.06542	5.19506
ENSG00000008441.16	20.6945	11.0704	6.13223
ENSG00000008710.18	19.0668	18.5405	17.117
ENSG00000008838.18	33.1994	25.7205	17.634
ENSG00000008853.16	5.01238	4.6173	3.15105
ENSG00000008869.11	7.30643	6.13572	5.5632
ENSG00000008952.16	6.26548	5.34847	4.27956
ENSG00000008988.9	15.4982	8.45784	2.5717
ENSG00000009307.15	14.8268	9.7627	4.95568
ENSG00000009335.17	8.48044	7.30273	5.76236
ENSG00000009413.15	3.10619	3.01489	2.33981
ENSG00000009780.15	4.07358	3.34649	2.95182
ENSG00000009830.11	14.3965	11.1818	6.45742
ENSG00000009844.15	4.10961	4.11006	3.01148
ENSG00000009954.10	6.0679	5.42618	4.32943
ENSG00000010017.12	4.78996	4.9598	4.30806
ENSG00000010072.15	1.74193	2.05457	2.28183
ENSG00000010165.19	4.38636	4.43567	4.68824
ENSG00000010244.17	4.86905	5.16116	5.03652
ENSG00000010256.10	24.5292	23.2969	10.3027
ENSG00000010270.13	5.7562	4.7184	2.56378
ENSG00000010278.12	18.8307	9.50451	3.09492
ENSG00000010292.12	16.2095	14.0791	7.81198
ENSG00000010322.15	11.1978	7.0069	7.00574
ENSG00000010361.13	36.557	32.4591	16.0724
ENSG00000010404.17	15.2786	9.58908	5.023
ENSG00000010539.11	1.05085	1.64592	1.48609
ENSG00000010803.16	10.6481	7.82036	4.47022
ENSG00000010810.17	5.83358	4.18119	4.01721
ENSG00000010818.8	2.35495	2.48463	2.4121
ENSG00000011007.12	4.40383	3.57772	2.50765
ENSG00000011009.10	15.1256	13.0965	7.17497
ENSG00000011021.21	1.71343	1.94767	3.08742
ENSG00000011028.13	27.4911	19.023	9.4116
ENSG00000011114.14	3.06511	2.81185	2.68814
ENSG00000011132.11	7.9728	13.6609	7.47734
ENSG00000011198.7	3.12168	2.91122	3.04707
ENSG00000011201.11	20.3764	7.16833	6.15565
ENSG00000011243.17	5.49902	5.23437	5.60868
ENSG00000011258.15	2.75655	1.43392	1.61197
ENSG00000011260.13	6.32674	4.8325	4.33128
ENSG00000011275.18	4.87864	4.83717	3.97359
ENSG00000011295.15	5.01304	4.17393	1.98707
ENSG00000011304.18	9.94003	7.60052	3.6578
ENSG00000011332.19	6.45631	7.20351	8.58957
ENSG00000011376.9	6.98721	7.2439	4.95454
ENSG00000011405.13	8.66866	6.91778	6.05555
ENSG00000011422.11	1.66791	0.959486	0.574929
ENSG00000011426.10	7.69655	6.811	4.23387
ENSG00000011451.17	12.9518	11.5004	9.05788
ENSG00000011454.16	7.28602	6.81861	6.85191
ENSG00000011485.14	14.2967	11.3048	10.244
ENSG00000011523.13	2.37029	4.33621	3.38095
ENSG00000011566.14	3.6659	2.99857	3.83308
ENSG00000011638.10	5.64328	3.09201	1.07511
ENSG00000011677.12	12.0708	7.08701	5.04078
ENSG00000012048.20	8.75025	11.4325	9.62121
ENSG00000012061.15	18.747	14.5989	9.00593
ENSG00000012174.11	12.3287	7.0321	5.72952
ENSG00000012211.12	5.12025	5.4183	5.5638
ENSG00000012232.8	7.09149	7.91034	4.32622
ENSG00000012660.13	7.14988	5.14578	2.5867
ENSG00000012822.15	26.2427	15.2976	23.5893
ENSG00000012963.14	5.10761	4.59466	3.48696
ENSG00000012983.11	6.43961	5.30894	4.72002
ENSG00000013275.7	13.7941	12.5704	9.46073
ENSG00000013288.8	40.7299	19.1533	7.18616
ENSG00000013306.15	68.7796	45.5115	16.0758
ENSG00000013364.18	32.3815	24.7402	13.0165
ENSG00000013374.15	6.9442	6.62438	4.19889
ENSG00000013375.15	9.00174	9.3183	8.3494
ENSG00000013503.9	3.99896	3.32728	4.05704
ENSG00000013523.9	13.2442	9.85816	5.57725
ENSG00000013561.17	6.18319	7.23518	5.64477
ENSG00000013563.13	34.2275	24.1764	8.01139
ENSG00000013573.16	8.97853	10.3434	6.39289
ENSG00000013583.8	9.97599	6.99258	3.91073
ENSG00000013588.6	1.60866	1.09033	0.759107
ENSG00000013619.13	4.39515	5.57764	4.74809
ENSG00000013810.18	11.5785	12.033	13.45
ENSG00000014123.9	4.74447	4.74167	5.56801
ENSG00000014138.8	8.06259	6.44697	5.20872
ENSG00000014164.6	7.37589	5.99203	6.59684
ENSG00000014216.15	33.8556	27.7146	14.5097
ENSG00000014641.17	22.7805	15.915	9.02054
ENSG00000014824.13	13.467	9.28424	5.09526
ENSG00000014919.12	10.2928	9.4371	6.2933
ENSG00000015133.18	7.05098	4.69187	2.54203
ENSG00000015153.14	4.42547	3.86971	2.13434
ENSG00000015171.18	7.9131	6.06105	5.5306
ENSG00000015475.18	10.7719	8.97308	4.09994
ENSG00000015532.9	10.2493	7.9794	7.7306
ENSG00000015676.17	7.28776	5.44018	2.89285
ENSG00000016391.10	5.18799	10.8816	3.85456
ENSG00000016864.17	18.7948	11.0171	6.57512
ENSG00000017260.19	15.8833	11.0278	8.29745
ENSG00000017483.14	32.1385	25.2458	9.77558
ENSG00000017797.11	11.392	8.11699	5.15478
ENSG00000018189.12	13.838	9.13944	7.42751
ENSG00000018408.14	2.72063	2.58163	2.48617
ENSG00000018510.13	8.2173	6.9877	5.69538
ENSG00000018610.13	6.47386	5.37051	3.48103
ENSG00000018699.11	6.33884	7.79096	6.48496
ENSG00000019144.17	5.10997	5.38513	4.22588
ENSG00000019186.9	3.70544	4.99503	4.9902
ENSG00000019485.12	1.20057	2.47226	2.20979
ENSG00000019549.8	0.346641	0.305141	0.193777
ENSG00000019995.6	2.98182	2.95779	2.783
ENSG00000020129.15	9.70789	9.59055	6.87066
ENSG00000020256.19	3.95521	3.34494	2.57521
ENSG00000020426.10	5.89729	4.76549	5.13759
ENSG00000020633.18	0.74726	0.720187	0.445913
ENSG00000020922.12	15.0579	15.2935	11.0714
ENSG00000021355.12	8.21026	6.21857	4.09238
ENSG00000021574.11	5.10938	3.64803	3.54638
ENSG00000021762.19	24.4672	15.4557	16.1177
ENSG00000021776.10	7.97551	6.64533	6.23118
ENSG00000021826.14	12.5536	7.74886	3.66161
ENSG00000022267.16	15.181	8.53591	3.35917
ENSG00000022277.12	10.4909	6.80514	4.41361
ENSG00000022567.9	3.21128	0.630137	1.59692
ENSG00000022840.15	16.1774	11.9804	5.58301
ENSG00000022976.15	4.86307	5.56499	4.04654
ENSG00000023041.11	8.85739	7.15919	5.50855
ENSG00000023171.15	4.27275	3.92003	3.94723
ENSG00000023191.16	25.2727	18.7102	10.6171
ENSG00000023228.13	12.1066	9.97208	7.9527
ENSG00000023287.12	10.1506	7.33766	5.60789
ENSG00000023318.7	10.7056	9.13743	4.80875
ENSG00000023330.14	6.69707	7.63866	7.46736
ENSG00000023516.8	7.90028	8.8178	8.14642
ENSG00000023572.8	6.8633	7.25262	5.63903
ENSG00000023697.12	13.7531	9.30913	5.72222
ENSG00000023734.10	9.40784	6.3883	3.16097
ENSG00000023902.13	4.0952	1.88242	1.65511
ENSG00000023909.9	4.65578	4.6111	4.12657
ENSG00000024048.10	4.7981	5.96066	4.36955
ENSG00000024422.11	12.5268	8.67749	4.37221
ENSG00000024526.16	6.4058	5.68973	4.46193
ENSG00000024862.17	6.02124	3.42348	3.19458
ENSG00000025156.12	2.10539	2.00436	2.25314
ENSG00000025293.16	3.45988	2.89725	1.98162
ENSG00000025434.18	12.0548	9.84018	8.32316
ENSG00000025770.18	21.4945	17.0418	13.8829
ENSG00000025772.7	10.9714	5.29469	1.87667
ENSG00000025796.13	6.66603	7.05844	4.37078
ENSG00000025800.13	9.57027	9.00398	6.2355
ENSG00000026025.14	16.9822	12.8304	4.31638
ENSG00000026103.20	2.98306	2.30829	2.36391
ENSG00000026508.16	7.96634	5.93228	3.5906
ENSG00000026559.13	7.42803	6.46976	4.4372
ENSG00000026652.13	3.38615	1.66599	2.10657
ENSG00000026950.16	15.8391	9.61768	20.8653
ENSG00000027001.9	13.8961	17.5443	8.11134
ENSG00000027075.13	2.91344	1.95079	1.92826
ENSG00000027697.13	2.39908	2.15752	2.30947
ENSG00000027847.13	23.8554	18.7534	10.0677
ENSG00000028116.16	8.45313	5.98322	6.1213
ENSG00000028203.17	4.35005	4.30936	3.94785
ENSG00000028310.17	4.59524	4.81157	3.89317
ENSG00000028528.14	11.3377	11.0108	9.82478
ENSG00000028839.9	1.92746	1.56852	1.62914
ENSG00000029153.14	13.414	5.89746	4.14264
ENSG00000029363.15	5.20467	4.49844	3.24993
ENSG00000029364.11	8.63892	6.93142	4.01768
ENSG00000029639.10	8.28072	7.58577	7.40357
ENSG00000029725.16	8.76299	6.4533	4.96147
ENSG00000029993.14	11.0168	7.06452	3.51787
ENSG00000030066.13	7.80126	7.66985	6.97754
ENSG00000030110.12	2.89912	2.52849	2.33024
ENSG00000030419.16	1.05084	4.18172	2.63864
ENSG00000030582.16	30.8221	31.2218	9.48047
ENSG00000031003.10	4.1082	3.64807	3.12559
ENSG00000031081.10	3.18467	3.37186	2.79511
ENSG00000031691.6	2.25811	2.95863	2.61755
ENSG00000031698.12	7.43431	7.1446	6.14095
ENSG00000031823.14	7.37023	6.72531	6.18146
ENSG00000032219.18	1.20008	2.64212	1.34044
ENSG00000032389.12	11.8815	8.05246	2.79511
ENSG00000032444.15	43.1145	50.6315	18.423
ENSG00000033011.11	9.11677	9.12506	7.04538
ENSG00000033030.13	2.98047	3.70161	3.49946
ENSG00000033050.7	8.76708	7.12342	5.06188
ENSG00000033100.15	7.79977	8.89429	5.73508
ENSG00000033170.16	7.25117	7.32341	4.3098
ENSG00000033178.12	11.2314	10.6226	8.36456
ENSG00000033327.12	1.63645	2.35588	2.02866
ENSG00000033627.15	9.70016	4.71449	2.74703
ENSG00000033800.13	3.01027	3.65256	2.83437
ENSG00000033867.16	10.0206	7.96285	6.3287
ENSG00000034152.18	1.71132	1.42271	0.754375
ENSG00000034510.5	21.9271	12.726	3.95412
ENSG00000034533.11	1.09386	1.32328	1.71663
ENSG00000034677.12	1.31262	1.38285	1.5012
ENSG00000034693.14	8.61662	9.45114	9.64272
ENSG00000034713.7	11.1934	8.4411	3.35207
ENSG00000035141.7	9.83538	6.41241	4.44606
ENSG00000035403.16	4.33881	3.08656	1.87869
ENSG00000035499.12	7.85746	6.43015	6.64206
ENSG00000035681.7	11.2735	8.19495	8.22547
ENSG00000035687.9	6.91572	5.52214	5.23288
ENSG00000035862.12	20.2158	7.86998	1.55194
ENSG00000035928.14	5.54703	5.38056	4.95521
ENSG00000036054.12	4.73031	4.32566	3.99712
ENSG00000036257.12	5.456	4.82937	4.47876
ENSG00000036549.12	3.0481	2.69923	2.47675
ENSG00000036672.15	4.4992	4.25223	0.897121
ENSG00000037042.8	32.7217	35.0782	18.1476
ENSG00000037241.7	8.1946	4.92437	2.82741
ENSG00000037474.14	6.49313	5.96634	5.92891
ENSG00000037637.10	2.05771	2.22283	2.26994
ENSG00000037749.11	3.16525	2.36137	3.11551
ENSG00000037757.13	20.6304	22.4372	11.0862
ENSG00000037897.16	4.5127	5.37036	5.02755
ENSG00000038210.12	10.0866	6.85948	5.43546
ENSG00000038219.12	6.59985	6.77463	8.30198
ENSG00000038274.16	6.49855	5.31367	4.79525
ENSG00000038295.7	8.29977	7.50909	6.41919
ENSG00000038358.14	20.354	19.9455	15.2863
ENSG00000038382.17	10.1514	9.43896	9.92784
ENSG00000038532.14	10.9462	9.61199	8.01011
ENSG00000039123.15	8.35337	8.44548	6.75718
ENSG00000039139.9	5.19771	5.0008	4.62193
ENSG00000039319.16	4.43939	6.31301	5.6404
ENSG00000039560.13	7.7266	5.52321	4.25467
ENSG00000039650.10	36.0183	61.1181	26.2421
ENSG00000040199.18	3.52823	2.10294	2.27295
ENSG00000040275.16	5.20875	5.49971	5.17863
ENSG00000040341.17	10.3964	6.22062	5.3313
ENSG00000040487.12	3.98267	2.75568	1.96198
ENSG00000040531.14	9.78223	8.82988	6.02419
ENSG00000040608.13	4.96899	2.48717	7.14676
ENSG00000040633.12	2.11222	2.05898	2.0824
ENSG00000040933.15	10.4045	10.4629	13.4772
ENSG00000041353.9	7.02219	6.89701	6.15425
ENSG00000041357.15	10.8797	10.8532	6.69686
ENSG00000041515.15	17.3952	13.1185	6.16694
ENSG00000041802.10	8.097	7.72237	6.95612
ENSG00000041880.14	26.4161	17.064	10.6941
ENSG00000041982.15	13.7697	8.75852	3.18723
ENSG00000041988.15	2.96333	2.92081	2.41642
ENSG00000042088.13	4.06025	5.10473	4.13625
ENSG00000042286.14	5.71038	5.55031	4.75592
ENSG00000042429.10	1.21732	1.51731	1.92268
ENSG00000042445.13	23.5856	21.1241	10.6902
ENSG00000042493.15	41.191	21.5703	12.8045
ENSG00000042753.11	20.3367	11.5957	1.97462
ENSG00000043093.13	4.9118	4.2165	3.68197
ENSG00000043143.20	4.38454	3.32044	2.09633
ENSG00000043514.15	6.00607	4.52182	3.35025
ENSG00000044090.8	18.2268	15.1518	4.98505
ENSG00000044115.20	14.4856	11.0323	6.62647
ENSG00000044446.11	21.5092	18.7016	16.8242
ENSG00000044459.14	8.52216	6.31428	6.32576
ENSG00000044574.7	5.62081	5.47462	3.36668
ENSG00000046604.12	11.3156	9.54552	5.02029
ENSG00000046651.14	6.53792	8.08007	9.07721
ENSG00000047056.14	1.40964	1.71935	0.913973
ENSG00000047188.15	10.9768	10.8873	7.74185
ENSG00000047230.14	11.5265	10.058	7.83824
ENSG00000047249.16	7.98343	7.56657	7.19662
ENSG00000047315.14	7.62809	8.10525	9.35374
ENSG00000047365.11	3.67786	4.36263	3.27263
ENSG00000047410.13	10.4964	8.80504	5.87693
ENSG00000047578.12	6.56447	6.98938	5.00392
ENSG00000047579.19	5.55053	4.1676	3.70756
ENSG00000047597.5	4.34243	5.12913	2.95881
ENSG00000047621.11	6.3191	6.05734	5.69732
ENSG00000047644.18	13.7149	11.2649	8.8456
ENSG00000047849.21	16.5823	14.5869	8.6017
ENSG00000047932.13	3.02582	3.01453	3.46726
ENSG00000048028.11	9.69747	18.7554	10.4623
ENSG00000048140.17	30.2362	26.3975	11.0607
ENSG00000048162.20	4.55216	3.27177	2.57271
ENSG00000048342.15	7.04231	6.93731	7.34961
ENSG00000048392.11	3.43576	3.67501	1.71842
ENSG00000048405.9	0.937436	1.64298	1.50217
ENSG00000048471.13	3.0308	3.91134	1.52199
ENSG00000048544.5	5.91786	5.35897	4.45996
ENSG00000048649.13	3.7739	3.83868	3.52604
ENSG00000048707.13	12.933	9.53191	8.36441
ENSG00000048828.16	18.4256	14.2219	8.49325
ENSG00000048991.16	13.4757	10.357	7.2604
ENSG00000049130.13	5.55343	4.91659	7.11015
ENSG00000049167.13	11.979	7.81154	4.25676
ENSG00000049192.14	11.6018	8.68348	4.80473
ENSG00000049245.12	10.3971	6.65865	3.82563
ENSG00000049246.14	12.0314	10.8041	9.30538
ENSG00000049323.15	16.1989	9.88405	3.48223
ENSG00000049449.8	11.2647	9.80785	4.4322
ENSG00000049541.10	7.01706	5.69037	3.43754
ENSG00000049618.22	5.79662	5.40712	4.54171
ENSG00000049656.13	26.3437	16.6442	7.1253
ENSG00000049759.17	4.55565	4.59596	4.13369
ENSG00000049860.13	24.823	13.5888	6.37208
ENSG00000049883.14	3.6741	5.39105	3.36349
ENSG00000050130.17	6.18142	4.72239	3.33962
ENSG00000050165.17	14.3978	6.35596	5.8494
ENSG00000050393.11	8.74115	5.48452	2.51228
ENSG00000050405.13	2.32825	2.30763	1.78732
ENSG00000050426.15	14.583	10.9543	7.3683
ENSG00000050555.17	25.4868	17.2591	14.4527
ENSG00000050748.17	17.7317	13.2013	9.04811
ENSG00000050820.16	2.17272	1.46346	1.39433
ENSG00000051009.10	3.31158	3.46735	4.23576
ENSG00000051108.14	1.16438	1.22101	1.28499
ENSG00000051128.18	14.7318	13.9356	5.52209
ENSG00000051180.16	4.29291	4.31366	3.25572
ENSG00000051341.13	7.0978	5.16774	5.55004
ENSG00000051382.8	5.02423	4.26215	3.42809
ENSG00000051596.9	11.0933	9.82126	7.83627
ENSG00000051620.10	26.0528	12.486	6.06992
ENSG00000051825.14	7.36289	6.61739	5.16157
ENSG00000052126.14	3.46151	2.81724	2.48011
ENSG00000052723.11	5.50366	5.07053	4.31518
ENSG00000052749.13	9.48348	5.88366	5.38133
ENSG00000052795.12	2.20972	2.56651	3.02194
ENSG00000052802.12	1.60869	1.86345	2.33729
ENSG00000052841.14	9.50928	7.11141	7.13692
ENSG00000053108.16	10.9517	6.92915	4.39759
ENSG00000053254.15	5.45891	3.78927	2.39003
ENSG00000053371.12	20.3144	17.9244	12.7712
ENSG00000053372.4	5.74802	4.14729	2.74421
ENSG00000053501.12	16.4775	14.747	9.45111
ENSG00000053747.15	8.11413	6.08165	2.81131
ENSG00000053770.11	4.57618	4.83953	4.22059
ENSG00000053900.10	9.46165	6.22855	12.9655
ENSG00000054116.11	8.38527	7.41478	5.5303
ENSG00000054118.13	7.10543	6.1022	3.10855
ENSG00000054148.17	38.6713	20.3965	5.76887
ENSG00000054267.20	1.98596	3.05595	2.54124
ENSG00000054277.13	8.51036	4.30042	2.93542
ENSG00000054282.15	11.9556	7.59734	8.25351
ENSG00000054523.17	6.19416	5.96698	5.41408
ENSG00000054598.6	0.518161	0.676277	0.785204
ENSG00000054611.13	8.42365	6.08093	2.61035
ENSG00000054654.15	15.576	7.443	6.82096
ENSG00000054793.13	16.2967	11.8524	5.81894
ENSG00000054965.10	6.73078	4.88136	4.03176
ENSG00000054967.12	3.48039	3.39912	4.04278
ENSG00000055044.10	4.83265	4.84462	3.22167
ENSG00000055070.16	5.26828	3.35724	1.4288
ENSG00000055130.15	6.41476	5.57339	6.10199
ENSG00000055147.18	9.2961	7.85682	9.95158
ENSG00000055163.19	20.3995	13.0076	6.02885
ENSG00000055208.18	2.13311	2.3122	2.48644
ENSG00000055211.12	10.2589	6.99967	4.92967
ENSG00000055332.16	9.55971	9.29399	6.72756
ENSG00000055483.19	2.55586	2.55501	1.75148
ENSG00000055609.17	8.0392	7.13706	6.00915
ENSG00000055917.15	4.81517	4.32495	4.46278
ENSG00000055950.16	16.3425	10.7952	4.22418
ENSG00000056050.6	15.3163	10.9232	7.0933
ENSG00000056097.15	7.03829	5.88723	4.20099
ENSG00000056277.15	3.03999	3.36782	3.88589
ENSG00000056586.15	4.69197	4.09184	3.65694
ENSG00000056972.18	1.87585	2.11848	1.61899
ENSG00000057019.15	9.15711	7.84772	6.42651
ENSG00000057252.12	8.34934	6.05119	4.2385
ENSG00000057294.14	4.11275	3.41248	2.1761
ENSG00000057608.16	9.86237	8.42842	5.97045
ENSG00000057663.13	4.16947	3.44654	2.3209
ENSG00000057757.9	4.37719	3.55687	2.51121
ENSG00000057935.13	4.93943	5.39357	3.92636
ENSG00000058056.8	8.93716	7.47227	6.13623
ENSG00000058063.15	8.68286	8.84255	4.97013
ENSG00000058091.16	5.86139	4.54767	3.39903
ENSG00000058262.9	10.296	7.97469	3.77264
ENSG00000058272.16	3.45234	4.34646	4.26297
ENSG00000058600.15	7.68861	6.81179	7.6013
ENSG00000058668.14	8.30094	18.9807	6.22089
ENSG00000058673.15	6.01817	4.86882	5.00228
ENSG00000058729.10	2.4366	2.41919	3.09027
ENSG00000058799.13	14.4072	9.65653	7.00067
ENSG00000058804.11	10.9726	9.98187	7.36673
ENSG00000059122.16	8.89601	9.78725	7.83899
ENSG00000059145.18	7.15218	7.84084	9.02986
ENSG00000059378.12	8.99497	7.11315	7.53512
ENSG00000059573.8	9.22688	6.22723	2.08073
ENSG00000059588.9	9.22455	11.6401	8.3946
ENSG00000059691.11	13.3715	10.7065	5.89324
ENSG00000059728.10	0.24585	0.571444	0.726755
ENSG00000059758.7	2.80413	2.94464	3.48177
ENSG00000059769.19	4.42101	3.86768	2.60339
ENSG00000059804.15	0.633564	0.160955	0.231569
ENSG00000060069.16	3.93836	2.56116	3.41341
ENSG00000060138.12	18.0911	10.4299	2.59862
ENSG00000060237.16	9.94532	8.60875	7.87603
ENSG00000060339.13	9.88818	9.21582	9.48284
ENSG00000060491.16	7.42568	7.09019	6.58594
ENSG00000060688.12	6.92228	5.70012	5.06549
ENSG00000060749.14	9.55482	8.80169	6.24274
ENSG00000060762.18	20.8057	12.3296	10.0938
ENSG00000060971.17	27.2001	21.707	9.04096
ENSG00000060982.14	12.088	8.77352	5.38122
ENSG00000061273.17	9.90368	12.8786	12.5863
ENSG00000061676.14	9.82968	9.2223	5.76085
ENSG00000061794.12	5.3756	4.70407	4.25776
ENSG00000061936.9	5.5167	5.57192	5.34996
ENSG00000061987.14	10.4447	9.67824	11.2797
ENSG00000062194.15	3.42439	3.03213	3.13444
ENSG00000062485.18	12.6358	10.9704	5.43859
ENSG00000062598.17	4.98122	5.76091	5.94646
ENSG00000062650.17	3.31115	3.73433	3.57503
ENSG00000062716.11	5.02201	2.39994	0.861643
ENSG00000062725.9	3.33463	3.82248	3.77582
ENSG00000062822.12	23.083	26.5243	18.6671
ENSG00000063046.17	8.21573	6.91742	4.57413
ENSG00000063169.10	2.66355	0.717189	2.77691
ENSG00000063176.15	10.4758	5.61226	5.20113
ENSG00000063177.12	19.9008	15.2017	5.96303
ENSG00000063241.7	25.4756	16.4895	9.84201
ENSG00000063244.12	12.6213	10.9843	8.02913
ENSG00000063245.14	28.2237	18.8527	11.499
ENSG00000063322.13	3.89034	3.8945	1.43671
ENSG00000063438.16	1.79148	2.57376	2.01534
ENSG00000063587.13	3.16676	4.22407	3.55553
ENSG00000063601.16	8.09574	5.49887	5.13289
ENSG00000063660.8	20.2	16.8157	6.29706
ENSG00000063761.15	13.6409	9.25021	4.67289
ENSG00000063978.15	2.48825	2.81028	2.51263
ENSG00000064012.21	3.97069	4.98336	4.02061
ENSG00000064042.17	9.00286	7.21604	4.98944
ENSG00000064102.14	6.69543	6.67822	6.4654
ENSG00000064115.10	26.5859	15.5309	8.31836
ENSG00000064309.14	9.1779	8.95916	6.29865
ENSG00000064313.11	9.84895	7.43431	6.81986
ENSG00000064393.15	11.0236	8.35646	4.27116
ENSG00000064419.13	8.08069	7.65515	4.99253
ENSG00000064490.13	18.879	15.9761	13.1254
ENSG00000064545.14	38.9285	36.3098	13.4331
ENSG00000064601.16	38.7838	30.2653	14.2771
ENSG00000064607.16	12.0667	10.7217	8.94782
ENSG00000064651.13	7.83295	5.4678	3.63865
ENSG00000064652.10	7.12375	4.09458	3.21153
ENSG00000064666.14	2.96844	2.14355	1.22741
ENSG00000064726.9	7.26742	5.66953	3.37644
ENSG00000064763.10	12.3163	10.635	6.55353
ENSG00000064932.15	6.2699	6.24698	8.59856
ENSG00000064933.16	8.63323	9.13496	9.14996
ENSG00000064961.18	30.2498	20.3514	10.0622
ENSG00000064995.16	5.25457	6.3071	5.30177
ENSG00000064999.13	4.24123	3.53019	3.26449
ENSG00000065000.15	15.4794	12.3257	9.53477
ENSG00000065029.14	16.6942	13.893	10.7845
ENSG00000065054.13	18.8654	12.9727	10.4661
ENSG00000065057.7	41.4164	22.6604	17.9287
ENSG00000065060.16	7.86219	7.42959	4.37424
ENSG00000065135.9	6.91994	5.65747	3.40722
ENSG00000065150.18	14.198	12.7026	8.49091
ENSG00000065154.11	10.8845	10.2348	4.72953
ENSG00000065183.15	5.83525	5.37529	4.28705
ENSG00000065243.19	7.94687	7.88639	6.48663
ENSG00000065268.10	32.7386	30.5677	14.1652
ENSG00000065308.4	9.72769	7.83744	5.14599
ENSG00000065325.12	17.5997	10.5979	4.98804
ENSG00000065328.16	4.02376	4.54841	4.39227
ENSG00000065427.14	11.2008	8.24998	4.70229
ENSG00000065457.10	11.1442	8.35637	8.10705
ENSG00000065485.18	10.5821	3.81418	1.94924
ENSG00000065491.8	2.25606	1.84756	1.40746
ENSG00000065518.7	23.9202	16.8885	11.0581
ENSG00000065526.10	4.28429	4.57103	4.46925
ENSG00000065548.17	6.52644	5.1764	5.00919
ENSG00000065559.14	3.61425	2.63582	2.36671
ENSG00000065600.12	4.79828	3.25751	2.97717
ENSG00000065613.13	6.94911	5.82029	5.20246
ENSG00000065615.13	8.46757	6.42832	4.404
ENSG00000065802.11	2.43719	1.74392	1.50767
ENSG00000065809.13	4.39741	2.94336	2.2011
ENSG00000065833.8	10.0113	8.2731	6.41019
ENSG00000065882.15	18.025	10.3796	5.58161
ENSG00000065883.14	3.87289	3.5775	4.17185
ENSG00000065911.11	4.26943	3.80713	2.71004
ENSG00000065923.9	12.0853	14.8891	9.11664
ENSG00000065970.8	2.25303	2.89835	2.14026
ENSG00000065978.18	17.8963	11.232	3.87286
ENSG00000065989.15	9.79863	9.36662	6.9856
ENSG00000066027.11	6.85076	4.56129	3.48231
ENSG00000066044.14	10.404	7.60569	4.8625
ENSG00000066084.12	5.48636	4.57288	4.73432
ENSG00000066117.14	6.14537	5.28062	3.47192
ENSG00000066135.12	3.64426	3.77405	3.43475
ENSG00000066136.20	6.53175	5.7429	3.81668
ENSG00000066279.16	9.60617	9.70292	8.10294
ENSG00000066322.13	8.66206	5.85096	3.11239
ENSG00000066379.14	7.3756	5.17459	4.24199
ENSG00000066382.16	5.61451	4.38749	4.78454
ENSG00000066422.4	2.74667	3.33395	3.83027
ENSG00000066427.21	6.5515	5.18108	2.66856
ENSG00000066455.12	4.00133	3.77434	3.72718
ENSG00000066557.5	8.37805	8.88394	7.11749
ENSG00000066583.11	6.64127	7.98254	6.03614
ENSG00000066629.16	14.4541	16.6431	8.11676
ENSG00000066651.17	5.02523	4.85193	5.19708
ENSG00000066654.13	2.2337	1.99115	1.92295
ENSG00000066697.14	6.80231	2.96026	2.35457
ENSG00000066735.14	15.8322	17.0944	11.5953
ENSG00000066739.11	12.5379	11.2533	11.7448
ENSG00000066777.8	8.98137	7.55181	6.62142
ENSG00000066827.15	5.10791	5.42891	3.70895
ENSG00000066855.15	6.12279	6.08597	4.06019
ENSG00000066926.10	14.4869	10.5098	6.05307
ENSG00000066933.15	5.72517	5.85154	5.09797
ENSG00000067057.16	15.6913	12.5457	7.425
ENSG00000067064.10	2.2	2.09304	1.09575
ENSG00000067066.16	10.4599	9.10783	6.97896
ENSG00000067113.16	4.14584	3.67639	3.56855
ENSG00000067167.7	10.8795	7.89745	3.94899
ENSG00000067177.14	17.7381	16.7242	16.1146
ENSG00000067182.7	4.13612	2.99573	2.60567
ENSG00000067191.15	3.98267	3.15082	1.16396
ENSG00000067208.14	5.41005	4.78216	4.80343
ENSG00000067225.17	16.8703	14.4674	6.62508
ENSG00000067248.9	7.0019	10.9427	7.08765
ENSG00000067365.14	7.05553	6.3389	3.26426
ENSG00000067369.13	8.84376	9.1718	7.76991
ENSG00000067533.5	5.3464	4.23142	3.71151
ENSG00000067560.10	14.5746	9.25795	3.42576
ENSG00000067596.10	5.58083	4.77121	4.11297
ENSG00000067606.16	6.03545	3.67184	3.57322
ENSG00000067704.9	16.279	13.3209	8.75739
ENSG00000067798.14	3.49776	3.88755	4.26878
ENSG00000067829.18	27.1942	27.3637	13.3689
ENSG00000067836.12	43.6715	50.2472	11.2943
ENSG00000067900.7	8.20987	8.21744	7.86434
ENSG00000067955.13	6.61313	4.87956	3.10548
ENSG00000067992.12	27.3795	29.0214	11.2739
ENSG00000068001.13	6.69953	5.81288	3.04973
ENSG00000068024.16	4.91366	4.2238	2.11482
ENSG00000068028.17	2.46874	1.18059	0.783098
ENSG00000068097.14	2.853	3.24074	2.92536
ENSG00000068120.14	15.7536	13.0355	6.13196
ENSG00000068137.14	1.61427	4.79586	6.42705
ENSG00000068305.17	2.86684	2.68068	2.53927
ENSG00000068308.13	10.7598	8.52348	7.30918
ENSG00000068323.16	6.44137	5.7537	2.95504
ENSG00000068354.15	2.99436	1.954	1.58996
ENSG00000068366.19	5.99798	5.14563	4.02222
ENSG00000068383.18	7.88012	5.6072	2.88649
ENSG00000068394.10	15.368	8.15601	9.22311
ENSG00000068400.13	16.7818	14.507	10.9206
ENSG00000068438.14	15.7553	12.1985	8.12277
ENSG00000068489.12	13.285	9.45418	4.98411
ENSG00000068650.18	9.76942	11.1028	6.0916
ENSG00000068654.15	8.26069	7.39053	7.0106
ENSG00000068697.6	10.744	6.67951	2.44868
ENSG00000068724.15	6.15003	5.00167	3.57941
ENSG00000068745.14	1.66662	1.71506	1.71745
ENSG00000068784.12	6.13903	6.07533	4.71789
ENSG00000068796.16	4.64668	3.98838	3.7561
ENSG00000068878.14	10.7261	10.053	6.65986
ENSG00000068885.14	8.02583	9.42203	4.09321
ENSG00000068903.19	31.2227	18.1134	10.5559
ENSG00000068912.13	6.89405	5.40002	5.12434
ENSG00000069011.15	4.72891	3.06649	1.83288
ENSG00000069020.18	2.98223	2.77855	2.94233
ENSG00000069248.11	8.55967	9.72247	8.61538
ENSG00000069275.12	13.8735	9.37225	4.99911
ENSG00000069329.15	10.162	9.63035	6.36181
ENSG00000069345.11	4.22161	3.24233	2.538
ENSG00000069424.14	16.4614	11.437	6.17741
ENSG00000069482.6	30.0519	20.1202	6.92952
ENSG00000069509.5	5.01349	3.06847	3.1653
ENSG00000069702.10	0.733723	1.36964	1.17897
ENSG00000069849.10	14.4253	8.83278	1.97795
ENSG00000069869.15	4.49081	3.7891	3.75027
ENSG00000069943.9	20.8386	12.9322	10.1041
ENSG00000069956.11	2.16617	1.36547	1.19418
ENSG00000069966.18	11.4711	9.69305	6.23206
ENSG00000069974.15	5.40368	4.31609	2.94294
ENSG00000069998.12	12.1375	12.7443	6.99107
ENSG00000070010.18	11.8619	9.84507	5.53863
ENSG00000070018.8	6.03319	4.82339	4.69783
ENSG00000070047.11	4.58335	4.80214	3.97986
ENSG00000070061.14	17.6677	16.0794	10.9046
ENSG00000070081.15	16.4351	7.28051	6.83771
ENSG00000070087.13	13.1806	10.0935	4.0586
ENSG00000070159.13	3.36037	3.57593	3.71178
ENSG00000070214.15	17.9459	10.1165	3.90694
ENSG00000070269.13	10.2557	7.57451	4.54858
ENSG00000070366.13	4.42807	5.14298	2.88014
ENSG00000070367.15	6.6394	7.57271	4.96828
ENSG00000070371.15	12.1036	13.6213	5.06107
ENSG00000070404.9	7.91482	7.43881	6.46904
ENSG00000070413.19	7.97466	7.26384	5.92588
ENSG00000070423.17	6.577	6.12082	4.95876
ENSG00000070476.14	3.93378	3.0899	3.9136
ENSG00000070501.11	9.95314	7.15197	5.2719
ENSG00000070540.12	9.49962	7.85425	4.49441
ENSG00000070614.14	9.86552	7.51685	5.26627
ENSG00000070669.16	10.3802	15.1187	8.58404
ENSG00000070756.14	15.2597	0.918772	0.539378
ENSG00000070761.7	3.60755	2.55681	2.30317
ENSG00000070770.8	5.49857	5.41405	4.61695
ENSG00000070778.12	2.56855	2.33951	3.47807
ENSG00000070785.16	10.7643	11.1799	7.52365
ENSG00000070814.17	11.0544	9.9718	8.73673
ENSG00000070831.15	7.63764	4.75693	2.07444
ENSG00000070882.12	6.37784	4.72211	5.72408
ENSG00000070950.9	5.67309	6.22034	5.61528
ENSG00000070961.15	4.93787	4.06345	4.14077
ENSG00000071051.13	4.38182	3.4166	1.92204
ENSG00000071054.16	10.8239	9.01597	6.94713
ENSG00000071082.10	17.2598	13.4657	6.4017
ENSG00000071127.16	6.88874	4.83971	2.5984
ENSG00000071189.21	4.43337	5.95822	5.43729
ENSG00000071205.11	6.19178	4.31673	4.68659
ENSG00000071242.11	7.40668	7.15908	4.9608
ENSG00000071243.15	1.91014	1.37019	1.09536
ENSG00000071462.11	15.5893	12.6463	6.74116
ENSG00000071537.13	9.99494	9.95057	5.15325
ENSG00000071539.13	6.09335	4.6	2.61508
ENSG00000071553.16	25.5918	17.7072	6.85878
ENSG00000071564.14	22.4883	17.5615	11.6916
ENSG00000071626.16	16.1356	12.724	8.72928
ENSG00000071655.17	15.8085	10.6612	7.51496
ENSG00000071794.15	12.8631	10.1154	8.47768
ENSG00000071859.14	25.2101	17.6344	10.0184
ENSG00000071889.16	24.1562	17.1142	9.80719
ENSG00000071894.15	39.9665	39.84	27.4957
ENSG00000071967.11	10.572	9.15533	6.06407
ENSG00000071994.10	11.4174	11.2183	5.82159
ENSG00000072041.16	9.6141	14.3469	4.86802
ENSG00000072042.12	6.75162	6.01439	3.53805
ENSG00000072062.13	16.9444	13.0526	5.91875
ENSG00000072071.16	21.0059	15.8103	8.8227
ENSG00000072110.13	10.0154	7.78403	3.57781
ENSG00000072121.15	11.6859	9.99872	8.30888
ENSG00000072134.15	5.42517	5.37916	6.13538
ENSG00000072135.12	6.47438	3.89552	2.15069
ENSG00000072163.19	15.9752	8.26537	10.4061
ENSG00000072195.14	7.9372	9.27228	6.52809
ENSG00000072210.18	13.1116	11.6599	10.0616
ENSG00000072274.12	9.16512	5.75169	2.78015
ENSG00000072310.16	13.2185	10.1907	9.71053
ENSG00000072364.12	4.12473	3.96367	3.97211
ENSG00000072401.14	3.52742	3.19294	2.76519
ENSG00000072415.8	3.15183	3.39376	3.40081
ENSG00000072422.16	2.3519	1.85007	1.73113
ENSG00000072501.17	13.2352	10.5965	6.71065
ENSG00000072506.12	20.5892	15.9271	7.47042
ENSG00000072518.20	3.07186	3.44986	2.8716
ENSG00000072571.19	8.54287	8.23957	6.52519
ENSG00000072609.17	7.18849	7.15916	8.27421
ENSG00000072736.18	6.55431	5.74181	4.10648
ENSG00000072756.16	3.21416	3.72817	3.95467
ENSG00000072778.19	47.3239	39.3706	21.1439
ENSG00000072786.12	6.33315	5.04289	5.36162
ENSG00000072803.17	4.21021	3.60015	3.33608
ENSG00000072832.14	10.5117	6.98546	4.88942
ENSG00000072840.12	10.3806	8.13571	6.47311
ENSG00000072849.10	5.51966	3.08459	1.97953
ENSG00000072864.13	4.02867	3.17591	1.70528
ENSG00000072958.8	9.41921	10.4919	6.60313
ENSG00000073008.14	4.47862	4.21339	3.67448
ENSG00000073050.11	14.0978	12.147	11.5934
ENSG00000073060.15	22.5777	16.174	5.02467
ENSG00000073111.13	6.72002	6.18345	2.84046
ENSG00000073150.13	27.4401	15.3788	8.8453
ENSG00000073169.13	14.3567	13.3003	8.29543
ENSG00000073417.14	10.2577	9.55267	7.98961
ENSG00000073464.11	5.65865	4.98006	4.46404
ENSG00000073536.17	4.731	3.26962	2.03733
ENSG00000073578.16	11.4582	9.72249	8.08853
ENSG00000073584.18	10.1475	6.58103	5.09121
ENSG00000073614.12	5.16033	4.84301	4.3755
ENSG00000073711.10	2.20518	3.55552	4.05626
ENSG00000073712.14	2.44336	2.12063	1.96426
ENSG00000073792.15	13.9878	10.0132	12.0989
ENSG00000073921.17	7.251	6.02454	5.44621
ENSG00000073969.18	9.01315	7.07831	4.69613
ENSG00000074054.17	7.32132	6.38395	4.68039
ENSG00000074071.14	10.4674	8.63239	4.70027
ENSG00000074181.8	32.9216	23.0512	12.0128
ENSG00000074201.8	9.80569	8.0107	6.14887
ENSG00000074219.13	15.7172	11.7365	9.51689
ENSG00000074266.18	2.92911	2.25271	2.17327
ENSG00000074319.12	5.50518	5.45117	4.82861
ENSG00000074356.16	7.61951	6.99583	6.64437
ENSG00000074410.13	13.6883	9.05693	6.69772
ENSG00000074582.12	19.9488	18.0014	10.0442
ENSG00000074590.13	0.861339	1.21205	1.41007
ENSG00000074603.18	5.60687	3.86988	2.66618
ENSG00000074657.13	10.7767	9.71524	5.79192
ENSG00000074695.5	20.4013	15.0984	6.71431
ENSG00000074696.12	9.08192	6.85859	4.04688
ENSG00000074755.14	10.4511	9.56927	4.62757
ENSG00000074800.13	15.6153	11.8926	3.42372
ENSG00000074842.7	22.0003	12.5836	7.90525
ENSG00000074935.13	5.86643	5.93681	5.57576
ENSG00000075089.9	6.96461	4.7999	6.41716
ENSG00000075131.9	3.45665	3.46015	3.24235
ENSG00000075142.13	14.6519	10.6184	5.20437
ENSG00000075151.20	9.51755	9.40742	8.40266
ENSG00000075188.8	7.46084	7.15715	7.85982
ENSG00000075213.10	3.13934	4.60299	3.77523
ENSG00000075218.18	7.88832	8.02574	6.68913
ENSG00000075223.13	7.48256	7.54321	4.1461
ENSG00000075234.16	15.0301	12.5161	6.33129
ENSG00000075239.13	16.3488	9.56687	8.89912
ENSG00000075275.16	17.5778	13.2417	9.26577
ENSG00000075292.18	8.24963	6.95377	6.58794
ENSG00000075303.12	5.37772	6.55356	4.82358
ENSG00000075336.11	7.05178	7.11553	4.37081
ENSG00000075391.16	6.30545	6.45832	6.5021
ENSG00000075407.18	4.61364	6.93929	6.2201
ENSG00000075413.17	6.87217	6.16704	6.66498
ENSG00000075415.12	12.4099	11.404	6.24936
ENSG00000075420.12	3.32245	3.61888	3.50877
ENSG00000075426.11	0.394757	0.507301	0.426791
ENSG00000075461.5	10.7588	7.11328	3.92529
ENSG00000075539.13	5.44626	4.55417	3.24287
ENSG00000075568.16	9.69119	7.51918	4.92757
ENSG00000075618.17	11.1904	9.22529	4.85491
ENSG00000075624.13	12.3666	7.34968	1.5171
ENSG00000075643.5	12.3978	10.1868	8.32158
ENSG00000075702.16	13.7564	15.3577	15.3894
ENSG00000075711.20	7.91139	7.08265	6.51667
ENSG00000075785.12	8.36019	6.21157	4.01355
ENSG00000075790.10	11.5617	7.09329	4.51525
ENSG00000075856.11	5.24992	4.48111	4.47203
ENSG00000075914.12	7.7463	8.84751	7.26223
ENSG00000075945.12	11.8907	10.7077	8.89896
ENSG00000075975.15	3.7345	3.63465	3.43329
ENSG00000076003.4	7.71329	7.00355	5.41278
ENSG00000076043.9	14.3519	12.7119	7.89661
ENSG00000076053.10	0.647271	0.933385	0.91212
ENSG00000076067.11	10.5784	6.62951	4.62194
ENSG00000076108.11	9.44676	9.33387	8.43854
ENSG00000076201.14	16.9818	14.6409	15.1916
ENSG00000076242.14	11.0078	13.6902	8.04635
ENSG00000076248.10	4.8473	5.59038	2.91049
ENSG00000076321.10	1.8715	2.41411	2.68652
ENSG00000076351.12	5.37218	4.99274	4.45835
ENSG00000076356.6	6.33845	6.94028	4.62914
ENSG00000076382.16	15.2673	15.4786	11.9811
ENSG00000076513.16	10.7752	9.93504	5.7382
ENSG00000076554.15	8.97056	6.30692	2.99679
ENSG00000076604.14	2.34392	1.82717	2.32329
ENSG00000076650.6	3.33705	3.36038	3.71796
ENSG00000076662.9	9.92517	5.45836	4.06081
ENSG00000076685.18	6.27304	6.05123	3.34209
ENSG00000076706.15	13.7372	10.1601	4.36503
ENSG00000076770.14	20.802	14.3676	8.48933
ENSG00000076864.19	17.3651	10.3662	9.49535
ENSG00000076924.11	9.61138	8.27989	7.90768
ENSG00000076928.17	19.333	18.2064	18.8789
ENSG00000076984.17	6.74336	5.93444	5.57481
ENSG00000077044.10	4.91471	5.19649	3.95864
ENSG00000077063.10	2.57482	4.70624	2.13833
ENSG00000077097.14	14.4365	11.2811	10.3703
ENSG00000077147.14	9.60821	7.82971	4.35517
ENSG00000077152.9	4.29366	3.75593	4.14926
ENSG00000077157.21	5.87544	7.60149	4.18973
ENSG00000077232.16	19.1201	13.5816	6.32079
ENSG00000077235.17	10.5993	11.2129	7.77503
ENSG00000077254.14	7.75527	6.51507	7.04051
ENSG00000077312.8	9.35509	9.48401	4.39926
ENSG00000077348.8	18.1664	16.0127	9.56331
ENSG00000077380.15	11.557	14.0906	6.79378
ENSG00000077454.15	14.1667	12.8826	16.1868
ENSG00000077458.12	1.5162	1.73597	1.74401
ENSG00000077463.14	10.3053	7.55889	6.95628
ENSG00000077514.8	4.13913	4.65912	4.13036
ENSG00000077549.17	14.4275	10.6492	4.61488
ENSG00000077585.13	6.71076	6.48601	3.76986
ENSG00000077684.15	2.04173	1.94819	1.98045
ENSG00000077713.18	13.7768	9.05923	5.3834
ENSG00000077721.15	10.7715	6.4092	4.69378
ENSG00000077782.19	23.2847	13.366	7.68873
ENSG00000077942.18	20.5155	14.1023	4.75481
ENSG00000078018.19	11.142	14.3715	6.48
ENSG00000078043.15	9.49838	9.46568	6.8115
ENSG00000078061.12	20.7255	16.5653	12.2145
ENSG00000078070.12	12.0297	14.3641	5.32598
ENSG00000078098.13	8.79545	6.70095	4.81202
ENSG00000078124.11	10.1752	9.07414	4.14153
ENSG00000078140.13	7.95864	6.08908	5.42368
ENSG00000078142.11	5.64199	6.93831	6.2319
ENSG00000078177.13	6.19984	6.36752	4.95215
ENSG00000078237.6	2.74388	2.18508	1.65408
ENSG00000078246.16	5.11864	5.44226	4.73206
ENSG00000078269.13	4.90372	4.29359	4.47108
ENSG00000078304.19	9.60082	7.84645	5.14587
ENSG00000078369.17	13.4504	8.19473	3.97351
ENSG00000078403.16	1.75443	1.85617	1.92177
ENSG00000078618.20	21.6177	16.1027	13.339
ENSG00000078668.13	11.8084	9.36931	5.34432
ENSG00000078674.17	13.2773	10.4448	9.50339
ENSG00000078687.17	4.33164	3.23085	6.97979
ENSG00000078699.21	2.96818	4.5041	3.14989
ENSG00000078747.13	5.10202	6.48658	4.22532
ENSG00000078808.16	20.0698	17.0193	8.03831
ENSG00000078902.15	3.59718	2.70527	1.78053
ENSG00000078967.12	15.5339	9.54183	3.56993
ENSG00000079134.11	8.54499	7.79983	8.42274
ENSG00000079150.17	15.3412	7.94966	4.87425
ENSG00000079156.16	6.70323	5.26076	5.05018
ENSG00000079246.15	10.7247	9.69851	6.41297
ENSG00000079277.19	10.7405	6.90198	5.12281
ENSG00000079313.12	7.46896	6.24828	7.6048
ENSG00000079332.14	4.67584	3.95744	2.43108
ENSG00000079335.18	2.91169	1.85977	1.64339
ENSG00000079387.13	4.63164	4.08018	3.60402
ENSG00000079432.7	13.5928	10.7583	9.69637
ENSG00000079459.12	10.3247	9.29454	6.70074
ENSG00000079462.7	69.7556	38.4014	21.3038
ENSG00000079482.12	5.80347	5.18919	4.7945
ENSG00000079616.12	11.6302	10.9692	10.718
ENSG00000079691.17	7.08435	5.85489	5.3499
ENSG00000079739.15	14.164	12.5363	6.49889
ENSG00000079785.14	13.504	12.7666	9.29913
ENSG00000079805.16	15.5879	16.4321	12.7108
ENSG00000079819.17	16.7166	16.0857	11.1657
ENSG00000079841.18	12.098	7.407	7.75097
ENSG00000079950.13	7.45693	6.4714	5.28699
ENSG00000079974.17	17.2523	13.3124	7.58557
ENSG00000079999.13	4.1279	3.31133	2.70023
ENSG00000080189.14	19.36	18.1631	9.95766
ENSG00000080200.9	8.91709	7.05036	8.09993
ENSG00000080298.15	2.29337	3.44909	4.06068
ENSG00000080345.17	4.39028	4.82524	4.81233
ENSG00000080371.5	5.04476	3.76852	3.09219
ENSG00000080503.21	12.4867	9.11072	10.9265
ENSG00000080546.13	1.89179	1.8848	1.03985
ENSG00000080561.13	4.93868	8.7064	3.87992
ENSG00000080603.16	10.3954	6.9848	4.99243
ENSG00000080608.9	6.17078	5.58008	6.2107
ENSG00000080802.18	2.31588	2.91102	1.96854
ENSG00000080815.18	5.06442	3.274	2.76901
ENSG00000080819.6	5.51712	5.47997	5.96824
ENSG00000080822.16	6.20185	8.04378	5.67976
ENSG00000080824.18	12.8126	11.8581	5.80889
ENSG00000080839.11	5.45731	5.34597	4.08744
ENSG00000080845.17	5.59616	4.32108	3.42641
ENSG00000080986.12	5.87806	6.02072	6.10381
ENSG00000081014.10	11.2192	7.70015	5.37003
ENSG00000081019.13	0.947496	1.51517	1.93899
ENSG00000081026.18	4.60782	4.26534	3.71557
ENSG00000081041.8	0.270297	0.150211	0.240796
ENSG00000081059.19	11.9746	8.28034	4.05988
ENSG00000081087.14	8.40257	9.47131	3.23627
ENSG00000081154.11	14.8918	8.35105	4.28197
ENSG00000081177.18	7.70331	6.92571	5.86901
ENSG00000081307.12	8.68179	9.8228	6.62697
ENSG00000081320.10	1.12256	1.49893	1.43089
ENSG00000081377.16	7.3854	5.96279	4.82083
ENSG00000081386.12	1.75184	1.93504	1.97489
ENSG00000081692.12	5.67344	6.36795	4.78772
ENSG00000081721.11	6.06487	4.24327	2.74631
ENSG00000081760.16	11.3194	9.51747	2.47772
ENSG00000081791.8	11.3372	11.6548	6.03753
ENSG00000081803.15	10.5067	9.53103	9.55964
ENSG00000081870.11	20.3569	12.2743	6.49364
ENSG00000081913.13	2.8723	3.09059	1.94275
ENSG00000081923.11	2.28333	3.96088	2.65634
ENSG00000082068.8	6.49175	5.62422	6.01257
ENSG00000082146.12	21.0713	6.2258	7.4081
ENSG00000082153.17	7.04896	5.35076	3.01547
ENSG00000082212.11	14.5939	14.5695	8.1396
ENSG00000082213.17	3.72021	3.27702	2.53519
ENSG00000082258.12	1.24411	1.17804	1.60378
ENSG00000082269.16	5.71766	6.00085	4.82207
ENSG00000082438.15	9.48888	6.96579	4.69043
ENSG00000082482.13	5.41247	3.55573	3.1031
ENSG00000082512.14	3.92995	3.53408	4.846
ENSG00000082515.17	9.51786	12.7417	7.9352
ENSG00000082516.8	6.74323	6.78432	6.05657
ENSG00000082641.15	7.98004	7.48398	3.46322
ENSG00000082701.14	5.71759	4.79475	4.21881
ENSG00000082781.11	13.6364	8.94006	2.9806
ENSG00000082805.19	7.98253	6.7468	5.03107
ENSG00000082898.16	6.97622	7.13841	6.85556
ENSG00000082996.19	8.06474	7.52174	5.92792
ENSG00000083093.9	1.85385	1.5488	2.06174
ENSG00000083097.14	5.09278	5.51306	5.73521
ENSG00000083123.14	17.7289	12.8602	6.06392
ENSG00000083168.9	3.3654	2.90763	3.01968
ENSG00000083223.17	3.39279	4.36583	3.04677
ENSG00000083290.19	9.69483	3.95967	3.05176
ENSG00000083312.17	5.98284	4.92641	3.78034
ENSG00000083444.16	16.1404	11.0389	4.23799
ENSG00000083457.11	16.9371	6.03853	3.29001
ENSG00000083520.14	3.46195	3.943	3.08716
ENSG00000083535.15	4.73171	4.81808	4.11441
ENSG00000083544.13	5.96629	5.45044	5.85439
ENSG00000083635.7	2.86385	2.57952	2.55019
ENSG00000083642.18	4.4927	4.54932	5.35389
ENSG00000083720.12	13.7872	9.8232	5.45228
ENSG00000083750.12	5.81198	4.29508	3.5379
ENSG00000083799.17	7.06574	4.84035	4.23718
ENSG00000083807.9	42.1289	23.6559	6.96041
ENSG00000083812.11	0.4837	0.672463	0.836089
ENSG00000083828.15	0.755541	1.40559	0.95214
ENSG00000083844.10	0.882233	1.59388	1.95188
ENSG00000083845.8	20.551	17.295	8.71977
ENSG00000083857.13	10.0459	8.90891	6.30047
ENSG00000083896.12	5.34501	5.66355	4.7693
ENSG00000083937.8	5.23359	3.7933	2.74706
ENSG00000084070.11	4.79329	4.73306	4.31986
ENSG00000084072.16	8.22074	5.87695	4.10724
ENSG00000084073.8	9.32903	6.83086	3.87286
ENSG00000084090.13	5.76327	5.30949	4.05349
ENSG00000084092.6	3.38241	3.50607	3.19179
ENSG00000084093.15	2.77911	2.79089	3.12421
ENSG00000084112.14	1.50313	1.23964	1.54024
ENSG00000084207.15	30.5104	24.5326	8.93635
ENSG00000084234.16	13.3551	8.89296	4.27817
ENSG00000084444.13	4.35871	3.51332	6.8033
ENSG00000084463.7	5.4053	4.91566	3.16427
ENSG00000084623.11	14.0247	10.5371	4.28656
ENSG00000084636.17	37.0364	11.477	21.1088
ENSG00000084652.15	2.18372	2.29756	1.96546
ENSG00000084676.15	4.501	4.57815	4.28103
ENSG00000084693.15	35.4552	25.9177	8.3078
ENSG00000084733.10	7.21066	5.48318	3.75994
ENSG00000084754.10	17.1665	14.1894	6.37522
ENSG00000084764.10	7.72465	5.96288	6.68704
ENSG00000084774.13	18.9906	19.3536	11.2729
ENSG00000085063.14	12.1258	6.01092	1.79037
ENSG00000085117.11	23.5531	18.5469	7.36436
ENSG00000085185.15	0.965835	9.3626	2.99959
ENSG00000085224.21	8.01969	8.23079	6.09752
ENSG00000085231.13	4.44659	4.25326	3.40083
ENSG00000085274.15	1.43977	1.74596	1.40409
ENSG00000085276.17	1.93109	3.08474	2.53419
ENSG00000085365.17	8.55441	6.39337	3.7074
ENSG00000085377.13	5.8896	5.21633	4.49054
ENSG00000085382.11	8.15818	6.06734	8.76891
ENSG00000085415.15	7.02045	4.89394	3.49425
ENSG00000085433.15	1.54576	2.04439	2.55214
ENSG00000085449.14	8.53875	5.83221	4.22053
ENSG00000085491.15	5.23926	3.96402	3.03169
ENSG00000085511.19	5.9213	6.09804	6.70632
ENSG00000085644.13	6.77872	4.60884	3.64338
ENSG00000085662.13	24.8209	19.2198	7.21954
ENSG00000085719.12	17.077	14.4995	5.15602
ENSG00000085721.12	4.74368	3.5481	2.91422
ENSG00000085733.15	18.7933	12.4513	6.21125
ENSG00000085760.14	10.0936	8.15818	7.42701
ENSG00000085788.13	14.7219	12.3371	7.84734
ENSG00000085832.16	9.09154	8.534	7.27824
ENSG00000085840.12	3.82259	4.14252	3.60287
ENSG00000085871.8	20.1808	15.9639	8.67284
ENSG00000085872.14	4.42284	4.3983	3.31455
ENSG00000085978.21	1.67964	1.98117	2.99551
ENSG00000085982.13	7.58715	5.76248	4.71415
ENSG00000085998.13	37.0032	29.8137	12.386
ENSG00000085999.11	13.4104	13.525	18.902
ENSG00000086015.20	11.9338	9.24252	8.60068
ENSG00000086061.15	5.55874	5.19147	4.05006
ENSG00000086062.12	6.88963	3.41722	0.695573
ENSG00000086065.13	7.23124	7.14125	5.5839
ENSG00000086102.18	3.12424	3.40883	3.29733
ENSG00000086189.9	5.72852	4.94249	4.28532
ENSG00000086200.16	7.65855	8.40952	4.73347
ENSG00000086232.12	13.6482	9.71845	6.32826
ENSG00000086289.11	4.88013	4.47418	3.61876
ENSG00000086475.14	9.70919	7.35731	3.36096
ENSG00000086504.15	17.3429	12.1219	7.66427
ENSG00000086544.2	0.919977	1.32417	1.10161
ENSG00000086589.11	2.86955	2.83962	2.21056
ENSG00000086598.10	12.8801	7.1025	2.75867
ENSG00000086666.18	6.02828	4.662	4.16594
ENSG00000086712.12	2.78981	2.41744	2.55871
ENSG00000086758.15	20.0072	16.8337	8.65061
ENSG00000086827.8	6.34962	7.77457	5.18264
ENSG00000087008.15	9.92083	8.21485	5.38336
ENSG00000087053.18	6.95066	5.15775	3.68047
ENSG00000087074.7	0.356602	0.130537	0.212469
ENSG00000087077.12	10.6739	9.86099	8.95538
ENSG00000087086.14	28.844	16.7239	4.05847
ENSG00000087087.18	10.3533	10.3334	9.0684
ENSG00000087088.19	15.9213	12.208	8.73962
ENSG00000087095.12	1.39202	1.46891	2.59356
ENSG00000087111.20	13.3134	8.13309	5.14457
ENSG00000087152.15	3.81234	3.27251	2.71003
ENSG00000087157.18	5.11062	4.91937	3.90108
ENSG00000087191.12	12.1492	9.82944	5.34201
ENSG00000087206.16	4.10179	4.29437	3.1806
ENSG00000087245.12	11.6856	6.59358	2.08479
ENSG00000087253.12	10.1209	9.1799	6.18696
ENSG00000087258.13	5.44858	6.05681	4.69023
ENSG00000087263.16	5.8354	4.52992	4.09627
ENSG00000087269.15	8.82479	6.78961	5.28213
ENSG00000087274.16	13.7172	12.3105	8.1613
ENSG00000087299.11	7.65071	6.38861	5.91504
ENSG00000087301.8	14.0183	10.9378	3.56033
ENSG00000087302.8	11.1986	8.88369	5.50995
ENSG00000087303.17	5.67143	7.49752	4.4186
ENSG00000087338.4	6.91305	6.11848	5.50484
ENSG00000087365.15	9.15582	7.9472	8.81837
ENSG00000087448.9	1.74347	1.91291	2.50235
ENSG00000087460.23	26.7601	19.1044	9.75318
ENSG00000087470.17	9.0236	8.92048	7.0342
ENSG00000087502.17	8.71856	6.917	5.18794
ENSG00000087586.17	5.24993	4.58297	3.83717
ENSG00000087842.10	14.7052	12.4413	8.35236
ENSG00000087995.15	5.21628	3.99879	2.27168
ENSG00000088035.15	24.5258	21.881	17.0209
ENSG00000088038.17	6.4741	5.00314	6.06488
ENSG00000088179.8	2.93371	3.44224	2.82203
ENSG00000088205.12	6.45423	6.17021	5.08951
ENSG00000088247.16	12.2242	10.4635	6.21253
ENSG00000088256.8	8.88121	8.38214	5.21264
ENSG00000088298.12	13.9874	14.8014	5.8264
ENSG00000088325.15	8.53239	7.72154	5.61497
ENSG00000088367.21	16.1201	11.0754	6.83537
ENSG00000088387.18	9.46728	7.65081	5.95208
ENSG00000088451.10	2.11118	2.91815	2.61293
ENSG00000088682.13	14.5457	10.5499	7.4363
ENSG00000088756.12	5.2973	3.03333	2.8349
ENSG00000088766.11	9.02215	6.15167	4.87918
ENSG00000088812.17	10.0001	5.02927	5.67451
ENSG00000088826.17	4.89109	2.53159	2.85195
ENSG00000088833.17	9.55183	6.73781	5.51641
ENSG00000088854.12	0.867464	1.23526	1.26
ENSG00000088876.11	2.3404	2.36491	2.04834
ENSG00000088930.7	10.6072	9.91766	7.57961
ENSG00000088986.10	8.2147	8.24634	3.95258
ENSG00000089006.16	4.65937	4.36073	4.90396
ENSG00000089009.15	17.655	12.2557	5.97184
ENSG00000089022.13	5.60456	4.80374	4.4224
ENSG00000089048.14	3.76705	4.10458	3.03708
ENSG00000089050.15	8.97018	8.51515	5.1467
ENSG00000089053.12	35.1161	28.2768	16.9839
ENSG00000089057.14	7.90678	4.71737	3.20794
ENSG00000089063.14	33.8291	23.737	3.04681
ENSG00000089094.17	5.83989	4.10478	5.38502
ENSG00000089123.15	6.29014	4.84984	2.75465
ENSG00000089154.10	17.4377	16.0091	9.05735
ENSG00000089157.15	17.7845	11.5456	3.48223
ENSG00000089159.16	14.8895	12.6486	9.01518
ENSG00000089177.18	6.42673	5.05615	6.52291
ENSG00000089195.14	4.36721	3.89317	3.50419
ENSG00000089220.4	16.7766	10.5185	3.77609
ENSG00000089234.15	2.96678	2.82468	2.20552
ENSG00000089248.6	9.87106	6.36421	2.58717
ENSG00000089280.18	10.0163	9.42664	6.48539
ENSG00000089289.15	6.04584	4.66174	4.13956
ENSG00000089327.14	26.4786	18.326	8.14366
ENSG00000089351.14	11.2253	7.22489	6.29421
ENSG00000089486.16	8.13111	5.25839	3.20331
ENSG00000089597.16	24.8483	17.591	6.91419
ENSG00000089682.16	6.01486	5.82875	5.57407
ENSG00000089685.14	10.4632	7.1439	2.96095
ENSG00000089693.10	12.3615	9.42138	5.51338
ENSG00000089737.15	6.15115	5.7158	5.31097
ENSG00000089818.16	3.0408	3.73445	3.48383
ENSG00000089876.11	4.2523	4.21743	4.07742
ENSG00000089902.9	3.69251	2.53119	2.75567
ENSG00000089916.17	5.96547	5.7469	6.76372
ENSG00000090006.17	17.6509	15.8104	13.9338
ENSG00000090013.9	40.3701	18.9455	10.6269
ENSG00000090020.10	10.4217	8.08325	7.37605
ENSG00000090054.13	9.052	9.26195	5.48575
ENSG00000090060.17	16.4448	11.1182	6.15287
ENSG00000090061.17	7.28418	6.3954	5.05789
ENSG00000090097.20	37.1402	25.8713	16.6982
ENSG00000090263.15	9.25087	9.68799	1.86196
ENSG00000090266.12	30.027	20.6249	7.97934
ENSG00000090273.13	9.08347	8.72541	5.9909
ENSG00000090316.15	7.88133	8.08893	6.31692
ENSG00000090372.14	8.38097	7.00721	5.54112
ENSG00000090376.9	17.845	11.0422	11.4044
ENSG00000090432.6	2.18808	1.59271	1.34556
ENSG00000090447.11	4.94855	4.31372	3.93859
ENSG00000090470.14	2.22782	2.586	2.59899
ENSG00000090487.10	20.6653	15.2497	7.26231
ENSG00000090520.11	11.2099	7.56677	4.12931
ENSG00000090530.9	7.8203	6.05032	4.0095
ENSG00000090565.15	14.6744	14.7653	9.53268
ENSG00000090612.20	2.1014	0.916169	1.60779
ENSG00000090615.13	15.4201	10.5834	7.80973
ENSG00000090621.13	10.9155	7.30206	0.611121
ENSG00000090674.15	26.1956	24.8119	14.1352
ENSG00000090686.15	9.01065	8.34851	6.709
ENSG00000090776.5	4.65039	6.45877	3.804
ENSG00000090857.13	7.3238	6.26314	2.16484
ENSG00000090861.15	9.96556	9.34209	8.08025
ENSG00000090863.11	15.7628	13.0096	4.12739
ENSG00000090889.11	10.2771	8.26876	4.4241
ENSG00000090905.18	3.79517	3.88316	3.95467
ENSG00000090924.14	5.42102	5.13863	6.1748
ENSG00000090975.12	7.36305	9.24677	10.1501
ENSG00000090989.17	7.65592	6.92682	7.66249
ENSG00000091009.7	2.67107	2.81698	2.39938
ENSG00000091039.16	7.68529	6.924	4.96406
ENSG00000091073.19	3.89966	3.95197	4.33466
ENSG00000091127.13	8.32987	6.65119	5.56148
ENSG00000091136.13	10.7133	8.35645	6.88856
ENSG00000091140.12	7.66839	7.72723	4.97915
ENSG00000091157.13	8.65897	5.19119	4.56207
ENSG00000091164.12	4.80299	4.18435	4.25096
ENSG00000091317.7	10.6894	7.69806	2.5418
ENSG00000091409.14	16.2443	9.02298	6.02537
ENSG00000091436.16	4.74057	4.6623	4.62074
ENSG00000091483.6	9.67902	9.68482	8.49951
ENSG00000091490.10	20.1846	13.5494	8.84183
ENSG00000091527.15	4.28872	3.18082	2.34843
ENSG00000091542.8	5.75057	4.21909	2.62711
ENSG00000091592.15	24.4605	14.6532	8.97492
ENSG00000091622.15	27.4954	12.9483	7.01489
ENSG00000091640.7	11.5874	9.38091	5.40687
ENSG00000091732.15	4.34376	4.1168	4.44873
ENSG00000091844.7	0.777954	2.24891	2.10643
ENSG00000091986.15	9.92648	8.95452	5.3136
ENSG00000092010.14	36.9022	31.2255	13.2329
ENSG00000092020.10	11.4194	6.78991	3.36289
ENSG00000092036.17	29.3345	15.9856	14.9005
ENSG00000092094.10	14.0355	9.80037	7.89274
ENSG00000092098.16	11.3734	14.2284	12.6155
ENSG00000092108.20	12.3442	10.0564	7.89217
ENSG00000092140.14	4.66375	4.30352	4.79373
ENSG00000092148.12	8.77884	7.9413	5.90659
ENSG00000092199.17	9.13519	6.55902	3.93883
ENSG00000092201.9	8.62854	6.3783	5.10796
ENSG00000092203.13	5.89154	4.35847	3.47324
ENSG00000092208.16	4.77114	4.3868	4.4108
ENSG00000092330.15	3.77342	4.33899	2.91984
ENSG00000092439.13	7.72894	6.72609	6.02476
ENSG00000092445.11	19.246	15.7061	7.92657
ENSG00000092470.11	5.18029	4.32469	3.39521
ENSG00000092531.9	10.8717	9.6478	4.95938
ENSG00000092607.13	1.81089	2.04043	1.93733
ENSG00000092621.11	13.3702	18.3966	9.91469
ENSG00000092820.17	4.92054	3.38461	1.41846
ENSG00000092841.18	16.3929	11.5511	4.9159
ENSG00000092847.11	26.7215	15.6471	10.5409
ENSG00000092853.13	6.56774	7.97129	7.22335
ENSG00000092871.16	2.43967	2.81119	2.8288
ENSG00000092929.11	62.006	35.5378	17.871
ENSG00000092931.11	9.64888	5.39531	9.1586
ENSG00000092964.17	14.3881	11.48	4.3562
ENSG00000092969.11	2.47154	2.0978	1.63708
ENSG00000092978.10	1.37301	1.81368	2.29292
ENSG00000093000.18	4.21418	3.417	3.55363
ENSG00000093009.9	23.4077	15.8306	13.2618
ENSG00000093010.12	25.9655	19.2618	8.84129
ENSG00000093144.18	9.6385	7.44069	4.3812
ENSG00000093167.17	8.45212	7.35725	7.16456
ENSG00000093183.13	10.8742	8.41039	5.00831
ENSG00000093217.9	10.2336	16.4427	11.9045
ENSG00000094804.9	2.83491	3.09471	3.11435
ENSG00000094841.13	6.96992	4.3352	4.38788
ENSG00000094880.10	4.095	3.83903	3.52003
ENSG00000094914.12	19.8128	19.0616	13.7121
ENSG00000094916.14	19.9211	13.4106	8.7487
ENSG00000094975.13	2.97529	3.52881	2.76902
ENSG00000095002.13	5.79744	7.66766	8.20883
ENSG00000095015.5	1.19978	1.62673	1.90159
ENSG00000095059.15	19.7616	18.167	10.3166
ENSG00000095139.13	6.75123	5.92047	3.81209
ENSG00000095209.11	12.057	9.84629	4.3714
ENSG00000095261.13	5.73801	6.33213	5.40821
ENSG00000095303.14	12.3966	13.1394	5.9968
ENSG00000095319.14	20.9986	17.8756	13.1919
ENSG00000095321.16	30.441	20.9224	9.20875
ENSG00000095380.10	14.2968	12.1808	6.45698
ENSG00000095383.19	4.90974	5.14076	5.04165
ENSG00000095397.13	13.3159	9.40487	11.0743
ENSG00000095485.16	8.10579	5.88584	4.42328
ENSG00000095564.13	3.62253	4.18226	3.54737
ENSG00000095574.11	1.91046	2.55318	2.55596
ENSG00000095739.10	0.872051	0.496287	0.500849
ENSG00000095787.21	2.6495	2.6041	2.35699
ENSG00000095794.19	3.21589	1.47766	0.278585
ENSG00000095906.16	18.7623	16.0398	6.57234
ENSG00000095951.16	1.46506	1.96617	1.67633
ENSG00000096060.14	8.56006	5.77704	4.41649
ENSG00000096063.15	10.3849	8.48208	8.4856
ENSG00000096070.19	5.64039	4.39338	3.30318
ENSG00000096080.11	6.2888	5.13393	2.40894
ENSG00000096092.5	18.0772	15.1262	7.66277
ENSG00000096093.15	26.9042	28.4595	11.9233
ENSG00000096384.19	8.62409	7.2196	4.70845
ENSG00000096401.7	3.8966	4.56742	3.93093
ENSG00000096433.10	30.5384	23.19	13.4819
ENSG00000096654.15	1.01546	1.5085	0.651328
ENSG00000096696.13	12.6762	9.30553	5.71257
ENSG00000096717.11	1.39645	1.80944	1.63779
ENSG00000096746.17	5.40679	4.48103	3.34001
ENSG00000096872.15	5.85093	6.0236	8.11953
ENSG00000096968.13	4.39409	4.2184	5.75424
ENSG00000097007.17	2.51158	2.40443	2.43537
ENSG00000097021.19	13.6307	12.9674	7.97968
ENSG00000097033.14	6.55717	5.68858	4.34328
ENSG00000097046.12	4.67962	4.41775	4.87082
ENSG00000097096.8	0.892778	1.40897	1.78602
ENSG00000099194.5	12.3207	8.57888	3.74734
ENSG00000099203.6	8.00881	6.72087	1.6509
ENSG00000099204.18	18.5882	12.4636	7.37141
ENSG00000099219.13	20.7027	9.82914	6.30971
ENSG00000099246.16	9.8065	7.7924	4.86067
ENSG00000099250.17	6.44081	6.86737	3.45879
ENSG00000099256.18	35.3559	7.22828	5.53971
ENSG00000099260.10	2.01123	1.86921	1.65437
ENSG00000099290.15	8.58882	12.7208	11.3346
ENSG00000099308.10	4.99651	5.66499	3.21137
ENSG00000099331.13	18.9398	17.0149	13.5693
ENSG00000099341.11	13.6142	10.506	4.81862
ENSG00000099364.16	11.0994	10.3036	10.152
ENSG00000099381.16	4.3756	4.59529	5.19228
ENSG00000099385.11	18.7581	14.4138	3.07655
ENSG00000099622.13	8.54673	5.0845	1.72905
ENSG00000099624.7	35.5806	26.9127	13.5251
ENSG00000099783.11	9.20265	8.76653	5.53489
ENSG00000099795.6	28.5394	20.3364	9.14109
ENSG00000099797.12	41.8145	35.3017	13.1706
ENSG00000099800.7	14.8872	6.65772	2.13
ENSG00000099804.8	6.73604	5.47312	3.2277
ENSG00000099810.18	5.46295	4.33642	3.24473
ENSG00000099812.8	2.39965	2.16855	1.29494
ENSG00000099814.15	19.9178	27.062	15.5329
ENSG00000099817.11	20.7029	16.7223	5.85292
ENSG00000099821.13	14.3131	13.0596	13.2372
ENSG00000099822.2	19.3642	15.1687	8.54162
ENSG00000099864.17	14.1307	8.96676	2.63799
ENSG00000099899.14	13.5741	15.0382	13.5377
ENSG00000099901.16	11.451	9.57756	6.7939
ENSG00000099904.15	29.7963	33.112	25.1843
ENSG00000099917.17	8.83052	8.32656	5.48226
ENSG00000099940.11	4.95475	5.11635	3.32689
ENSG00000099942.12	2.27196	2.71975	2.58486
ENSG00000099949.18	26.6141	35.1785	18.8351
ENSG00000099956.18	11.4326	9.69728	6.59252
ENSG00000099968.17	3.75161	2.86112	1.84181
ENSG00000099991.17	21.5287	22.3014	11.754
ENSG00000099995.18	8.09142	6.06626	4.05425
ENSG00000100014.19	1.81515	1.92983	1.505
ENSG00000100023.18	35.2449	24.3038	17.6669
ENSG00000100028.11	8.05255	7.12714	5.25544
ENSG00000100029.17	7.38086	6.01644	4.80684
ENSG00000100030.14	9.04716	7.45057	5.58102
ENSG00000100034.13	15.6776	10.786	9.82186
ENSG00000100036.12	1.49284	1.44266	0.729337
ENSG00000100038.19	6.44043	6.85103	3.91305
ENSG00000100056.11	2.91548	2.68855	3.29793
ENSG00000100065.14	6.40304	6.29063	5.9748
ENSG00000100075.9	23.1331	18.8587	9.72828
ENSG00000100077.14	7.76138	5.74599	4.83605
ENSG00000100083.18	10.9876	9.65107	12.42
ENSG00000100084.14	5.93951	5.34394	5.1655
ENSG00000100097.11	44.6382	28.8388	8.50631
ENSG00000100099.20	8.49422	7.61289	7.94388
ENSG00000100104.13	4.73321	4.18018	2.92768
ENSG00000100105.17	1.22611	1.76343	1.42213
ENSG00000100109.16	2.14002	2.91409	2.81401
ENSG00000100116.16	26.3739	19.5775	9.12496
ENSG00000100124.13	7.16244	7.14174	6.64071
ENSG00000100129.17	12.0964	10.8745	5.93685
ENSG00000100138.13	10.2505	8.75604	3.87564
ENSG00000100139.13	11.3714	6.73418	5.03204
ENSG00000100142.14	15.7631	11.2017	5.14657
ENSG00000100147.13	9.01427	12.6813	21.5967
ENSG00000100150.16	3.91051	4.2158	5.25011
ENSG00000100151.15	11.8702	8.49585	11.5219
ENSG00000100154.14	11.117	10.6283	7.34662
ENSG00000100162.14	26.8068	23.3465	7.50829
ENSG00000100196.10	16.3731	12.2668	10.073
ENSG00000100201.19	11.614	11.1744	9.75515
ENSG00000100207.18	5.41851	4.92183	4.6728
ENSG00000100209.9	9.39807	3.68054	1.84529
ENSG00000100211.10	14.4454	13.8393	10.3949
ENSG00000100216.5	8.93833	5.77328	2.34472
ENSG00000100219.16	1.3984	1.82783	1.24729
ENSG00000100220.11	9.96389	8.45574	3.7892
ENSG00000100225.17	8.18347	5.51891	3.34852
ENSG00000100226.15	10.108	6.28754	1.87412
ENSG00000100227.17	3.51608	3.80841	2.58338
ENSG00000100234.11	8.26063	3.49877	0.585508
ENSG00000100239.15	24.2394	25.7714	16.2923
ENSG00000100241.20	40.8736	36.1075	22.7723
ENSG00000100242.15	16.5083	7.40141	3.24276
ENSG00000100243.20	22.9439	15.2569	4.49986
ENSG00000100258.17	52.2175	69.1864	20.4966
ENSG00000100263.13	6.72924	6.23874	5.51113
ENSG00000100266.18	5.8131	4.32744	3.46071
ENSG00000100280.16	30.3509	20.4027	7.37986
ENSG00000100281.13	1.63546	2.2133	2.51794
ENSG00000100284.20	7.59953	5.27553	2.87428
ENSG00000100285.9	12.5971	10.8627	9.76349
ENSG00000100294.12	4.36355	3.58981	2.56623
ENSG00000100296.13	13.0982	9.01061	7.35151
ENSG00000100297.15	11.1765	11.5881	9.10517
ENSG00000100300.17	58.6016	40.3114	10.6758
ENSG00000100304.12	15.2958	12.0143	6.90265
ENSG00000100316.15	21.4375	16.4598	5.79865
ENSG00000100319.12	14.9165	8.22815	2.93809
ENSG00000100320.22	8.69833	9.86165	8.95719
ENSG00000100324.13	6.1934	6.16901	8.073
ENSG00000100325.14	14.2616	10.9718	7.10579
ENSG00000100330.15	3.30075	3.53095	3.86046
ENSG00000100335.13	3.7869	3.26427	2.65628
ENSG00000100344.10	7.62564	7.86504	8.70676
ENSG00000100345.20	11.1353	5.96465	2.53459
ENSG00000100347.14	13.6504	12.3964	9.60154
ENSG00000100348.9	9.43812	7.79384	3.83187
ENSG00000100350.14	18.9413	11.5292	6.01024
ENSG00000100353.17	9.08379	8.66441	7.47401
ENSG00000100354.20	5.73265	7.49868	5.53048
ENSG00000100359.20	71.7775	55.4117	21.6092
ENSG00000100364.18	15.2784	9.94843	6.56829
ENSG00000100372.14	5.2343	5.01694	4.18528
ENSG00000100376.11	3.00694	2.74701	1.61695
ENSG00000100379.17	19.8831	13.1213	9.97255
ENSG00000100380.13	10.662	9.03765	5.12445
ENSG00000100387.8	13.808	12.8641	7.5661
ENSG00000100393.11	3.61089	3.67167	3.15519
ENSG00000100395.14	7.9481	7.25079	7.47439
ENSG00000100401.19	7.20846	6.1965	3.99218
ENSG00000100403.11	18.2288	14.2775	11.0806
ENSG00000100410.7	3.95953	3.43258	1.77495
ENSG00000100412.15	16.8095	14.0643	4.63299
ENSG00000100413.16	6.23976	6.00021	4.48684
ENSG00000100416.12	8.61942	7.95593	6.19457
ENSG00000100417.11	12.1003	12.9097	6.09022
ENSG00000100418.7	15.726	13.1378	7.90465
ENSG00000100422.13	11.5668	5.92665	3.35358
ENSG00000100425.18	2.05685	2.3226	2.53861
ENSG00000100426.6	2.9295	2.22995	2.60867
ENSG00000100439.10	4.84684	3.32134	1.4924
ENSG00000100442.10	26.7821	21.2827	9.90889
ENSG00000100445.17	19.3868	20.2204	6.846
ENSG00000100461.17	5.12234	4.30498	3.98263
ENSG00000100462.15	10.5846	8.68715	6.02561
ENSG00000100479.12	8.44318	9.198	10.2096
ENSG00000100485.11	2.90497	3.80832	3.24107
ENSG00000100490.9	7.78593	4.20615	3.98722
ENSG00000100503.23	9.7365	7.51148	5.31309
ENSG00000100504.16	12.2046	10.8164	8.1488
ENSG00000100519.11	5.56447	6.11566	4.47591
ENSG00000100522.8	4.82167	4.09595	2.63098
ENSG00000100523.14	6.33884	6.5962	7.12629
ENSG00000100526.19	17.248	9.42587	6.70092
ENSG00000100528.11	8.95354	6.8726	3.29783
ENSG00000100532.11	3.11939	2.14776	1.36172
ENSG00000100554.11	5.09551	4.69928	3.25332
ENSG00000100558.8	10.8463	7.61401	4.84246
ENSG00000100564.8	7.04262	4.47443	3.63556
ENSG00000100567.12	12.1141	10.5079	9.47518
ENSG00000100568.10	12.5127	8.39657	4.57751
ENSG00000100575.13	4.48205	3.78689	3.44357
ENSG00000100577.18	46.2266	48.9189	7.66076
ENSG00000100578.14	10.2115	11.1294	8.43108
ENSG00000100580.7	10.5849	8.27089	7.69902
ENSG00000100591.7	8.48739	6.10097	5.87963
ENSG00000100592.15	0.841033	0.732685	1.16714
ENSG00000100596.6	5.88745	5.2481	4.46532
ENSG00000100600.14	18.8258	20.57	4.50377
ENSG00000100601.9	2.05724	1.8286	1.42672
ENSG00000100603.13	4.53466	3.85948	3.68169
ENSG00000100605.16	13.8765	8.95068	4.86787
ENSG00000100612.13	12.3719	7.06914	4.8974
ENSG00000100614.17	3.73115	4.32038	3.56806
ENSG00000100629.16	8.98002	6.47799	7.47821
ENSG00000100632.10	11.6831	8.44989	3.91619
ENSG00000100644.16	3.23653	2.96398	2.51828
ENSG00000100647.7	3.42172	0.972887	1.00354
ENSG00000100664.10	3.54991	2.95712	1.94599
ENSG00000100697.14	5.68205	4.86816	5.2652
ENSG00000100711.13	7.24098	5.9314	5.60627
ENSG00000100714.15	14.0342	11.7079	7.96326
ENSG00000100722.18	6.6718	7.179	6.59623
ENSG00000100726.14	26.7649	17.1279	11.061
ENSG00000100731.15	6.1309	5.91658	4.37225
ENSG00000100744.14	2.2929	2.31852	2.08866
ENSG00000100749.7	10.4408	12.1978	9.72927
ENSG00000100796.17	2.94088	3.05763	3.1817
ENSG00000100802.14	7.03425	4.36438	4.29363
ENSG00000100804.18	10.6111	9.65313	5.07841
ENSG00000100811.11	4.76977	3.95176	3.82741
ENSG00000100813.14	9.54423	10.6141	9.12798
ENSG00000100814.17	3.57907	1.9426	0.493727
ENSG00000100815.12	5.35721	5.50378	7.02618
ENSG00000100823.11	8.95374	8.66122	6.98395
ENSG00000100836.10	19.6247	12.5135	7.60729
ENSG00000100852.12	4.75864	5.38377	4.97157
ENSG00000100865.14	8.22811	5.79315	3.09633
ENSG00000100883.11	7.14618	6.9774	7.79677
ENSG00000100888.12	5.49967	4.86962	4.48948
ENSG00000100889.11	15.7099	20.4343	6.98524
ENSG00000100906.10	0.44211	0.295947	0.214701
ENSG00000100908.13	14.1638	14.92	6.84428
ENSG00000100911.14	42.5553	30.1874	11.7683
ENSG00000100916.13	2.98759	2.59286	2.80402
ENSG00000100934.14	9.88133	9.14449	4.51641
ENSG00000100938.17	14.2419	12.9582	4.73853
ENSG00000100949.14	18.9853	27.686	14.4595
ENSG00000100982.11	7.80672	6.69039	6.45387
ENSG00000100983.9	31.657	22.3214	10.5263
ENSG00000100991.11	11.0671	10.9206	7.27998
ENSG00000100994.11	14.3729	8.77684	4.65776
ENSG00000100997.18	13.0337	11.9712	5.15608
ENSG00000101000.5	23.0233	13.8879	7.07136
ENSG00000101003.9	5.93129	5.37331	5.1429
ENSG00000101019.21	7.16535	6.21876	5.11988
ENSG00000101040.19	2.21424	1.68716	2.21364
ENSG00000101052.12	12.4591	7.62725	3.88199
ENSG00000101057.15	21.7611	14.5274	6.96294
ENSG00000101079.20	30.4105	23.7359	9.98695
ENSG00000101084.16	7.00517	4.93415	1.48336
ENSG00000101109.11	5.73455	4.6001	4.3651
ENSG00000101126.15	2.50804	2.66089	2.66605
ENSG00000101132.9	7.11121	6.26949	3.62689
ENSG00000101138.11	1.90234	2.10048	1.79827
ENSG00000101146.12	4.52849	3.52421	2.18069
ENSG00000101150.17	12.7664	9.63581	6.6971
ENSG00000101152.10	7.37333	6.19446	4.41338
ENSG00000101158.13	17.6229	16.4952	9.87067
ENSG00000101160.13	17.6933	14.4206	5.5414
ENSG00000101161.7	10.2825	10.4888	8.64652
ENSG00000101166.15	4.69713	3.92215	2.49513
ENSG00000101181.17	4.92846	4.66948	3.60132
ENSG00000101182.14	17.3205	11.8789	5.37581
ENSG00000101187.15	7.63012	3.07688	1.36697
ENSG00000101189.6	7.15376	4.73273	3.65819
ENSG00000101190.12	12.4882	10.517	7.0546
ENSG00000101191.16	2.2605	2.55209	2.47439
ENSG00000101193.7	4.66376	3.33219	3.098
ENSG00000101194.17	24.3108	18.0225	13.205
ENSG00000101199.12	9.27429	9.60873	9.74872
ENSG00000101210.10	29.2653	25.1668	16.5588
ENSG00000101216.10	1.7252	1.44278	0.973011
ENSG00000101220.17	40.7477	26.7796	10.3005
ENSG00000101224.17	12.3605	9.89396	10.3013
ENSG00000101236.16	3.58633	2.85247	3.18992
ENSG00000101247.17	6.40313	7.18787	4.56585
ENSG00000101255.10	1.52973	1.59011	0.605666
ENSG00000101266.17	6.56833	5.11101	3.54145
ENSG00000101290.13	9.68714	9.56694	4.48208
ENSG00000101294.16	11.143	7.01732	4.63628
ENSG00000101310.14	6.11897	6.13313	4.46646
ENSG00000101311.15	7.86894	7.43745	5.21329
ENSG00000101333.16	9.10384	6.49494	5.92094
ENSG00000101335.9	9.53735	4.4171	1.36364
ENSG00000101337.15	9.01378	8.89776	5.82521
ENSG00000101343.14	4.48277	4.67805	4.53548
ENSG00000101346.12	7.47318	6.44095	3.9022
ENSG00000101347.8	15.3816	9.5956	7.18716
ENSG00000101350.7	7.31999	6.27733	4.68625
ENSG00000101361.15	5.60621	4.94762	4.42185
ENSG00000101363.12	5.75819	5.11373	1.70774
ENSG00000101365.20	25.7443	18.4958	12.0695
ENSG00000101367.8	7.28575	4.29279	1.55879
ENSG00000101384.11	0.957022	0.715311	0.568516
ENSG00000101391.20	10.5202	9.94091	9.29204
ENSG00000101400.5	39.6903	23.2629	9.31058
ENSG00000101407.12	5.31733	5.324	5.65598
ENSG00000101412.12	8.88156	9.75991	7.94525
ENSG00000101413.11	2.05499	2.44658	2.35863
ENSG00000101421.3	8.11988	5.53631	3.36942
ENSG00000101439.8	22.5674	26.8866	6.73522
ENSG00000101442.9	5.00223	6.30687	6.94057
ENSG00000101444.12	16.256	12.0928	4.44292
ENSG00000101447.13	4.38019	3.88981	3.44485
ENSG00000101452.14	3.37353	4.08277	2.73018
ENSG00000101457.12	6.2765	5.08247	4.05478
ENSG00000101464.10	14.0777	11.8484	4.39834
ENSG00000101473.16	31.0537	24.5628	12.9482
ENSG00000101474.11	16.8532	14.6135	8.08393
ENSG00000101544.8	1.61246	1.69579	1.54644
ENSG00000101546.12	18.9024	16.4217	11.0186
ENSG00000101557.14	8.42628	8.70822	7.41742
ENSG00000101558.13	4.96686	3.96327	2.68512
ENSG00000101577.9	0.600224	1.8346	1.79314
ENSG00000101596.14	6.04739	4.87301	4.30574
ENSG00000101608.12	4.87819	3.26965	1.82273
ENSG00000101624.10	4.04543	4.2895	3.22196
ENSG00000101639.18	11.5578	9.56935	8.13141
ENSG00000101654.17	4.41541	3.80823	3.66607
ENSG00000101680.13	10.1498	10.1607	7.61686
ENSG00000101745.16	4.29127	4.05996	5.15124
ENSG00000101751.10	6.88237	7.38528	8.77677
ENSG00000101752.11	8.16427	7.78836	7.08792
ENSG00000101773.17	4.78598	4.81713	4.21396
ENSG00000101782.14	5.44078	3.51292	1.31095
ENSG00000101811.13	6.44543	6.81763	7.5348
ENSG00000101825.7	22.2228	8.37949	0.924967
ENSG00000101843.18	11.6039	5.87663	2.29077
ENSG00000101844.17	8.16746	4.45418	4.79576
ENSG00000101846.6	14.0036	9.24931	3.07159
ENSG00000101849.15	7.59252	4.49211	3.11851
ENSG00000101856.9	12.3129	8.2849	3.15807
ENSG00000101868.10	10.7016	8.31694	5.7426
ENSG00000101871.14	4.66864	5.0543	4.96402
ENSG00000101882.9	9.04608	8.45548	7.25648
ENSG00000101888.11	12.1368	7.09586	2.79341
ENSG00000101901.11	10.8352	8.38971	6.92095
ENSG00000101911.12	9.63067	6.23537	3.84175
ENSG00000101928.12	4.6964	3.4751	4.1018
ENSG00000101935.9	4.57001	5.0954	3.19461
ENSG00000101940.17	29.9379	23.0645	15.1675
ENSG00000101945.16	2.86575	2.42238	2.04065
ENSG00000101966.12	2.82324	2.4294	2.59175
ENSG00000101972.18	7.41839	7.61272	5.23303
ENSG00000101974.14	8.35268	7.80879	5.61083
ENSG00000101986.11	24.2929	18.9575	12.6611
ENSG00000101997.12	23.5654	26.7686	24.5202
ENSG00000102007.10	18.1976	12.054	2.11626
ENSG00000102024.17	11.7096	6.75237	2.04396
ENSG00000102030.15	25.3672	21.682	11.6237
ENSG00000102034.16	4.40693	3.73046	2.00916
ENSG00000102038.15	19.8668	13.0359	8.02887
ENSG00000102048.15	24.1685	25.9062	14.4821
ENSG00000102054.17	17.0507	12.9781	7.65077
ENSG00000102078.15	11.6514	11.7045	10.8367
ENSG00000102081.13	10.7341	8.33428	6.7923
ENSG00000102096.9	3.56201	3.36774	3.16544
ENSG00000102098.17	3.68482	4.00082	3.94516
ENSG00000102100.15	4.79145	3.1631	1.88201
ENSG00000102103.15	14.369	14.2503	10.1602
ENSG00000102119.10	20.3977	12.2111	4.62852
ENSG00000102125.15	20.773	26.5435	17.366
ENSG00000102144.13	14.3097	10.2109	3.93805
ENSG00000102158.19	16.9961	9.12144	2.70012
ENSG00000102172.15	17.4256	14.5205	7.04989
ENSG00000102181.20	9.7979	6.31156	2.68969
ENSG00000102189.16	5.89759	4.64925	3.18596
ENSG00000102218.5	2.89512	3.24214	2.72632
ENSG00000102221.13	4.18862	3.85723	2.87037
ENSG00000102225.15	26.3017	19.3103	8.24198
ENSG00000102226.9	14.1365	12.0752	9.65923
ENSG00000102241.11	9.92655	7.63656	5.09731
ENSG00000102265.11	21.2565	14.9019	5.81382
ENSG00000102271.13	11.0566	7.46095	3.98241
ENSG00000102287.17	10.6605	7.97663	5.41563
ENSG00000102302.7	21.7555	29.6157	14.2554
ENSG00000102309.12	18.9761	17.0596	5.76988
ENSG00000102312.20	27.1265	17.726	6.06518
ENSG00000102316.16	22.3114	15.0059	10.5153
ENSG00000102317.17	11.4301	7.05425	2.4836
ENSG00000102384.13	12.0366	12.043	14.9588
ENSG00000102390.10	3.9074	2.00685	3.12812
ENSG00000102393.9	12.8561	11.4531	6.92875
ENSG00000102401.19	4.61289	4.75932	4.71351
ENSG00000102471.13	6.6048	5.24202	3.13293
ENSG00000102531.16	3.45088	2.58563	3.22534
ENSG00000102543.14	6.0868	2.30465	2.15012
ENSG00000102547.18	10.124	7.48046	3.88961
ENSG00000102554.13	0.678254	0.694976	0.784088
ENSG00000102572.14	6.30279	4.77677	3.22295
ENSG00000102580.14	5.85383	5.63284	3.65069
ENSG00000102595.18	12.7935	13.191	9.28094
ENSG00000102606.17	5.26161	5.28219	5.43406
ENSG00000102699.5	11.2778	12.6627	7.99785
ENSG00000102710.19	7.03121	5.53255	6.63034
ENSG00000102738.7	4.94013	4.79794	7.34931
ENSG00000102743.14	8.40629	4.48449	4.33338
ENSG00000102753.9	6.44332	6.52285	4.09453
ENSG00000102763.16	8.78608	5.89775	3.11364
ENSG00000102780.16	5.88034	9.48058	5.92358
ENSG00000102781.13	2.83135	2.9681	2.88234
ENSG00000102786.14	2.52913	2.38671	2.54294
ENSG00000102804.14	0.583807	0.613641	0.529411
ENSG00000102805.14	4.79033	3.22927	3.17848
ENSG00000102858.12	9.95423	8.50501	6.56425
ENSG00000102870.5	1.83683	1.97869	1.93987
ENSG00000102882.11	45.0349	24.5885	15.3549
ENSG00000102893.15	19.7359	18.284	11.8464
ENSG00000102897.9	11.4172	5.54755	1.30356
ENSG00000102898.11	17.2819	9.25564	1.62203
ENSG00000102900.12	11.1169	12.4032	8.10498
ENSG00000102901.12	36.4727	30.2983	25.8764
ENSG00000102908.20	7.20361	6.86837	6.44755
ENSG00000102910.13	10.3861	8.49482	6.92555
ENSG00000102921.7	2.14209	2.28657	2.49559
ENSG00000102931.7	7.77063	5.097	2.49166
ENSG00000102967.11	9.52596	8.79175	6.1243
ENSG00000102974.14	3.60431	2.87721	2.75961
ENSG00000102977.13	13.8107	16.159	12.6997
ENSG00000102978.12	6.94585	5.59302	3.54625
ENSG00000103005.11	19.6537	13.7849	6.32417
ENSG00000103018.16	9.75508	6.87505	4.31675
ENSG00000103021.9	12.6541	8.6268	8.88547
ENSG00000103035.10	6.2678	5.48096	4.13473
ENSG00000103042.8	8.7772	5.96026	4.17299
ENSG00000103043.14	16.1085	15.0175	12.0123
ENSG00000103047.7	9.19555	6.14031	6.52477
ENSG00000103051.18	22.7767	19.4928	11.9137
ENSG00000103061.12	5.17484	3.97714	2.77065
ENSG00000103064.13	9.6066	7.57335	5.55014
ENSG00000103066.12	6.17591	4.54534	2.23759
ENSG00000103067.12	15.8358	12.3475	9.14401
ENSG00000103091.14	13.5931	13.1825	12.7398
ENSG00000103111.14	4.04578	4.90543	4.75752
ENSG00000103121.8	8.09967	5.56483	2.78859
ENSG00000103126.14	4.39747	4.57176	3.66303
ENSG00000103145.10	52.1959	41.2824	14.6669
ENSG00000103148.15	31.7812	22.8528	13.3841
ENSG00000103150.5	6.32176	3.97941	9.12094
ENSG00000103152.11	30.3526	28.6625	16.7365
ENSG00000103160.11	5.07472	4.67539	3.46869
ENSG00000103168.16	12.7553	13.2683	11.4424
ENSG00000103174.11	10.5361	7.60241	7.28421
ENSG00000103175.10	19.3828	6.05935	3.35494
ENSG00000103187.7	12.2756	6.0362	1.12468
ENSG00000103194.15	5.43105	6.06332	4.63332
ENSG00000103196.11	1.27644	0.710481	0.955753
ENSG00000103197.16	37.4978	34.3701	25.9126
ENSG00000103199.13	0.473682	1.29219	2.18481
ENSG00000103202.12	38.063	25.417	7.63924
ENSG00000103222.18	11.3396	9.46919	6.52361
ENSG00000103241.6	0.873736	1.25002	0.599354
ENSG00000103245.13	5.73975	7.09556	5.41135
ENSG00000103248.18	5.91853	4.36548	3.34245
ENSG00000103249.17	33.9938	37.2762	14.6203
ENSG00000103257.8	9.61096	6.10309	1.38206
ENSG00000103264.16	3.45675	2.91061	2.13981
ENSG00000103266.10	27.3932	23.6036	9.28427
ENSG00000103274.10	6.48334	5.4571	4.49209
ENSG00000103275.19	9.31687	6.20966	3.55735
ENSG00000103319.11	12.9509	8.55785	5.2519
ENSG00000103326.11	20.5242	17.3241	18.9007
ENSG00000103335.20	29.2875	30.4338	18.0206
ENSG00000103342.12	9.71522	7.54767	5.67632
ENSG00000103343.12	1.71374	2.83639	2.81101
ENSG00000103351.12	6.68294	6.47957	6.6017
ENSG00000103353.15	15.7264	9.39335	5.66174
ENSG00000103356.15	10.6133	7.90915	5.8882
ENSG00000103363.14	30.7908	22.4592	10.6681
ENSG00000103365.15	9.33718	10.1651	8.56976
ENSG00000103381.11	9.4224	5.14632	2.36819
ENSG00000103404.14	4.78627	3.72606	3.4123
ENSG00000103415.11	6.59017	7.54779	7.89718
ENSG00000103423.13	6.75368	6.45594	6.56422
ENSG00000103429.10	3.31859	2.49377	1.7057
ENSG00000103479.15	24.006	19.5108	14.6525
ENSG00000103485.17	29.8586	25.2141	12.9275
ENSG00000103494.12	7.04897	7.50949	8.4736
ENSG00000103495.13	11.942	7.5648	4.22369
ENSG00000103496.14	13.442	11.3524	9.36194
ENSG00000103502.13	21.1976	14.799	9.24865
ENSG00000103507.13	23.5867	21.2325	10.7144
ENSG00000103510.19	8.7653	11.2626	7.45719
ENSG00000103512.14	16.7817	14.1807	6.51356
ENSG00000103540.16	4.20221	4.07034	4.91771
ENSG00000103544.14	17.2408	17.3953	9.60272
ENSG00000103549.21	9.16958	7.73839	8.3289
ENSG00000103550.13	2.87393	3.30582	2.25828
ENSG00000103591.12	8.00057	5.81333	4.19709
ENSG00000103642.11	4.26572	5.84089	5.53423
ENSG00000103653.16	9.91356	8.53894	9.15286
ENSG00000103657.13	12.5733	9.96553	6.77135
ENSG00000103671.9	5.80157	5.49518	5.37686
ENSG00000103707.9	6.72566	5.10487	4.69249
ENSG00000103769.9	7.75429	6.13318	4.57101
ENSG00000103852.12	4.28557	2.89671	3.11776
ENSG00000103855.17	14.7211	10.007	4.37735
ENSG00000103876.11	27.4268	22.0467	13.9919
ENSG00000103932.11	12.3754	17.3657	14.8049
ENSG00000103966.10	3.57901	2.37956	0.952904
ENSG00000103978.15	4.22996	4.04769	3.68276
ENSG00000103994.16	7.45416	6.32716	6.11014
ENSG00000103995.13	5.53251	4.86266	4.41029
ENSG00000104047.14	3.6736	2.79353	3.252
ENSG00000104064.16	3.33321	3.89773	3.1113
ENSG00000104067.16	7.75505	7.01003	5.26873
ENSG00000104093.13	11.7344	11.4425	10.2179
ENSG00000104129.9	8.6905	8.00742	6.64572
ENSG00000104131.12	6.01855	4.98755	3.81382
ENSG00000104133.14	13.0433	12.1969	8.92324
ENSG00000104142.10	3.33735	2.71607	1.62337
ENSG00000104147.8	10.8615	9.81936	8.7548
ENSG00000104164.10	7.00966	5.57716	3.55501
ENSG00000104213.12	14.8159	13.8208	5.21382
ENSG00000104218.14	3.97464	4.94053	4.64694
ENSG00000104219.12	22.0704	9.90573	3.42124
ENSG00000104228.12	1.63269	2.09201	1.22681
ENSG00000104231.10	6.72167	4.34025	3.72705
ENSG00000104267.9	4.9166	4.54227	10.125
ENSG00000104290.10	4.82384	2.34887	1.83279
ENSG00000104299.14	6.93034	3.65167	3.7439
ENSG00000104312.7	2.86473	1.97402	1.71441
ENSG00000104313.17	1.23623	1.68148	1.96353
ENSG00000104320.13	7.8654	6.34805	5.48337
ENSG00000104325.6	29.8019	26.2557	16.469
ENSG00000104331.8	8.43284	7.39097	3.55016
ENSG00000104341.16	17.9543	9.10981	3.71248
ENSG00000104343.19	1.36204	1.70156	1.55659
ENSG00000104356.10	5.60209	4.51454	4.25094
ENSG00000104365.13	16.0158	8.18023	7.14846
ENSG00000104369.4	3.54898	2.82299	2.46142
ENSG00000104375.15	3.2249	4.03456	3.65564
ENSG00000104381.12	12.4837	7.6369	5.33873
ENSG00000104388.14	6.37015	5.01186	3.10742
ENSG00000104408.9	9.21124	10.0132	7.47311
ENSG00000104412.7	9.13054	8.42802	7.29651
ENSG00000104419.14	5.76772	4.32414	1.28491
ENSG00000104427.11	3.33083	4.23978	4.21301
ENSG00000104442.9	6.23304	4.5351	4.57393
ENSG00000104447.11	2.18844	2.52462	2.15502
ENSG00000104450.12	2.93495	2.66184	4.01577
ENSG00000104472.9	7.94765	4.9556	1.50668
ENSG00000104497.13	1.25206	1.83804	1.43644
ENSG00000104517.12	7.42851	6.08461	5.11449
ENSG00000104522.15	25.3218	24.2051	11.8928
ENSG00000104529.17	32.5559	24.2868	12.5953
ENSG00000104549.11	5.41999	4.33831	3.81837
ENSG00000104611.11	4.36448	3.56786	3.9569
ENSG00000104613.11	10.7785	9.19953	6.87601
ENSG00000104626.14	4.91901	5.33733	4.58013
ENSG00000104635.13	8.00774	6.8717	4.58231
ENSG00000104643.9	2.79056	2.35127	3.4384
ENSG00000104660.17	10.6775	7.90484	6.04166
ENSG00000104671.7	5.04892	5.50348	3.89853
ENSG00000104679.10	8.71368	7.0421	6.03511
ENSG00000104687.12	10.9167	8.99282	6.62025
ENSG00000104689.9	4.32589	2.7581	3.29279
ENSG00000104691.14	6.3595	4.91824	3.05305
ENSG00000104695.12	5.68902	4.97756	3.37453
ENSG00000104714.13	6.98816	5.69964	4.3601
ENSG00000104723.20	26.0581	14.8468	7.85144
ENSG00000104731.13	12.5619	13.0328	10.6532
ENSG00000104738.16	8.88546	9.21016	6.96736
ENSG00000104756.15	5.97238	5.29014	3.38385
ENSG00000104763.18	25.2343	15.2236	8.93293
ENSG00000104765.15	10.3846	6.29105	1.82696
ENSG00000104783.11	14.2573	7.46969	7.36619
ENSG00000104805.15	24.2132	19.2644	11.698
ENSG00000104812.14	29.9455	23.2868	13.1429
ENSG00000104823.8	27.8729	24.575	13.0595
ENSG00000104824.16	14.3197	10.0018	3.16106
ENSG00000104825.16	6.32353	9.17302	4.19904
ENSG00000104852.14	11.7757	10.8853	8.34362
ENSG00000104853.15	16.1255	13.4635	7.3801
ENSG00000104859.14	11.6195	9.05443	10.3792
ENSG00000104866.10	6.01543	5.67436	7.9636
ENSG00000104872.10	24.2415	20.5333	9.13042
ENSG00000104881.15	7.47661	6.86244	8.50845
ENSG00000104884.14	14.8343	12.246	9.14187
ENSG00000104885.17	8.75669	7.93979	5.34077
ENSG00000104886.10	5.49271	4.74697	5.34852
ENSG00000104889.4	17.3302	15.3245	13.2946
ENSG00000104897.9	11.9425	11.5269	10.5558
ENSG00000104904.12	20.7374	14.3528	5.17207
ENSG00000104907.12	16.9339	17.7337	14.8928
ENSG00000104915.14	32.9969	21.0223	13.2359
ENSG00000104946.11	13.0319	11.5703	5.04694
ENSG00000104957.13	3.52379	3.04547	3.41629
ENSG00000104960.15	53.53	35.0682	18.127
ENSG00000104964.14	33.0672	22.9606	9.53632
ENSG00000104969.9	5.86596	5.23671	3.01624
ENSG00000104973.15	31.0676	29.6018	19.2506
ENSG00000104976.11	6.39653	4.79325	1.75443
ENSG00000104979.8	11.8444	7.09634	1.94398
ENSG00000104980.7	11.9609	8.81448	7.45055
ENSG00000104998.3	9.60315	6.68739	6.02373
ENSG00000105011.8	6.20449	6.27916	4.23493
ENSG00000105048.16	29.7342	16.1301	5.28083
ENSG00000105053.10	10.7093	6.46269	4.86258
ENSG00000105058.11	5.04904	3.3183	1.61787
ENSG00000105063.18	23.9586	22.6298	15.8288
ENSG00000105072.8	2.45623	3.10184	2.54951
ENSG00000105085.10	0.497869	0.40078	0.473411
ENSG00000105088.8	10.9601	16.3761	4.38085
ENSG00000105127.8	3.65164	2.76723	3.10497
ENSG00000105135.15	19.1306	20.3208	7.52808
ENSG00000105136.19	1.18931	0.997068	1.32473
ENSG00000105137.12	5.10928	3.85242	5.48759
ENSG00000105171.9	8.12955	5.48845	4.00352
ENSG00000105173.13	3.32782	3.49751	3.26137
ENSG00000105176.17	9.43575	8.09137	5.75629
ENSG00000105185.11	15.5693	12.781	4.31763
ENSG00000105186.15	6.19587	4.68392	4.56899
ENSG00000105193.8	23.3257	17.7959	6.67781
ENSG00000105197.10	14.0138	9.98196	5.2752
ENSG00000105202.7	14.103	12.0883	5.42242
ENSG00000105220.14	25.5281	21.341	12.4579
ENSG00000105221.16	24.2093	14.7852	8.02717
ENSG00000105223.19	48.4655	32.5331	12.1443
ENSG00000105229.6	4.33025	5.69128	4.77467
ENSG00000105245.9	5.01985	5.07633	5.50648
ENSG00000105248.15	3.35477	2.93793	2.76731
ENSG00000105254.11	18.4827	15.8249	8.67749
ENSG00000105258.8	24.2752	15.4423	6.20473
ENSG00000105281.12	7.0327	5.32988	2.26803
ENSG00000105287.12	10.4283	7.46738	5.41525
ENSG00000105298.13	8.58285	6.78363	6.60697
ENSG00000105321.12	2.39901	1.96201	3.37331
ENSG00000105323.16	10.9055	8.65815	5.54656
ENSG00000105325.13	5.25286	5.29851	4.88246
ENSG00000105329.9	27.5089	23.0579	13.7735
ENSG00000105339.10	3.28628	2.69944	2.06508
ENSG00000105341.18	11.0017	6.4424	3.17996
ENSG00000105355.8	11.9105	9.5419	4.50948
ENSG00000105364.13	10.5109	11.0141	8.40442
ENSG00000105372.6	24.402	20.2717	10.2367
ENSG00000105373.18	13.8533	12.2419	9.98215
ENSG00000105379.9	36.7153	30.8942	11.3866
ENSG00000105393.15	46.8683	33.4767	12.4988
ENSG00000105397.13	38.6101	38.4564	23.4257
ENSG00000105401.7	18.9752	15.2506	8.41286
ENSG00000105402.7	20.8926	17.0506	7.76052
ENSG00000105404.10	93.6155	82.8858	26.15
ENSG00000105419.17	21.8539	30.16	9.463
ENSG00000105426.15	55.3445	27.8353	16.8975
ENSG00000105438.8	23.7029	17.1209	6.88789
ENSG00000105443.13	5.05693	5.6706	3.44879
ENSG00000105447.12	3.9583	3.1417	1.91561
ENSG00000105483.16	6.24793	7.55879	8.10046
ENSG00000105486.13	22.5798	25.3391	13.0075
ENSG00000105497.7	1.00823	1.90062	2.0073
ENSG00000105520.10	30.9315	19.5329	9.39967
ENSG00000105538.9	13.1197	8.43947	3.75962
ENSG00000105552.14	21.1583	18.86	7.40871
ENSG00000105556.11	2.3325	1.6977	2.12389
ENSG00000105568.17	15.1343	11.6702	5.98713
ENSG00000105576.15	7.67952	8.88241	6.83869
ENSG00000105583.9	25.0246	15.3904	2.92228
ENSG00000105607.12	30.7037	30.3679	17.1642
ENSG00000105613.9	20.7749	10.7557	9.23976
ENSG00000105617.3	2.5528	1.5627	2.26758
ENSG00000105618.13	20.6602	15.8844	10.2549
ENSG00000105619.13	7.58358	6.90344	4.33545
ENSG00000105643.9	1.17395	0.972649	0.604698
ENSG00000105656.12	0.656243	0.438289	0.508555
ENSG00000105662.15	18.1795	15.097	13.1196
ENSG00000105669.13	31.8441	25.6757	18.9051
ENSG00000105671.11	14.4623	10.6191	5.618
ENSG00000105676.13	7.48066	7.64734	4.95505
ENSG00000105677.11	54.6937	35.221	6.79875
ENSG00000105698.15	19.2802	15.0201	8.9541
ENSG00000105700.10	12.5872	9.38273	2.56803
ENSG00000105701.15	36.5763	33.8919	14.4106
ENSG00000105705.15	6.38975	5.6619	6.00825
ENSG00000105722.9	3.85251	4.11817	2.97573
ENSG00000105723.11	6.65844	6.6143	5.64174
ENSG00000105726.16	12.9724	11.9803	4.81151
ENSG00000105738.10	9.15311	6.9171	4.04614
ENSG00000105755.7	22.3621	21.2796	6.82228
ENSG00000105771.13	4.54511	3.63944	1.7484
ENSG00000105778.17	2.88069	2.62054	2.71187
ENSG00000105793.15	3.60598	3.41605	3.57278
ENSG00000105810.9	6.51204	5.3125	4.2522
ENSG00000105819.13	9.25328	8.04358	8.39525
ENSG00000105825.11	6.46513	4.44924	2.14856
ENSG00000105829.11	3.52558	3.00265	2.3441
ENSG00000105835.11	4.73048	3.46321	2.48438
ENSG00000105849.5	2.993	2.50666	2.44905
ENSG00000105854.12	23.8722	19.583	10.3588
ENSG00000105855.9	2.88826	2.73683	2.48954
ENSG00000105865.10	6.41737	5.94729	3.86318
ENSG00000105866.13	2.04849	3.39333	2.95269
ENSG00000105875.13	6.46262	9.03501	8.86764
ENSG00000105879.11	1.81152	1.94041	1.35514
ENSG00000105887.10	9.77422	6.62043	2.7618
ENSG00000105926.15	7.75212	9.17471	7.65819
ENSG00000105928.13	18.9196	15.1677	7.80076
ENSG00000105939.12	6.94042	5.8725	3.27687
ENSG00000105948.13	5.64443	6.50551	5.17139
ENSG00000105953.14	14.306	13.8057	8.41318
ENSG00000105968.18	25.8689	20.9372	8.31738
ENSG00000105971.14	3.09089	2.00434	1.32795
ENSG00000105974.11	6.72795	4.31074	1.77632
ENSG00000105976.14	10.3624	7.37068	5.12277
ENSG00000105983.19	11.2094	9.1208	4.80565
ENSG00000105993.14	6.0678	4.44423	3.08875
ENSG00000106003.12	5.04802	2.80031	4.08564
ENSG00000106009.15	14.8734	18.0256	12.0267
ENSG00000106012.17	21.3218	10.9061	7.16154
ENSG00000106025.8	5.1628	5.22305	4.69549
ENSG00000106028.10	12.3134	11.2844	8.67554
ENSG00000106049.8	12.6782	10.8154	5.23492
ENSG00000106052.13	9.75361	8.43208	6.56163
ENSG00000106070.17	7.94164	7.02823	6.81584
ENSG00000106077.18	6.07336	5.79007	5.10612
[truncated: 7,220 more rows]
