# Supplementary material for: The molecular basis of coupling between poly(A)-tail length and translational efficiency
Source: eLife. 2021 Jul 2;10:e66493. doi: 10.7554/eLife.66493 (PMC8253595; doi:10.7554/eLife.66493)
Supplement: Figure 6—source data 1. [file elife-66493-fig6-data1.xlsx]

## Sheet: Figure 6
Source data for values shown in Figure 6C and Figure 6D
Figure 6C
Sample	Replicate	Lane	Puromycin	Puromycin+BkGnd	Total	Total+BkGnd	Puromycin / Total	Plotted values (normalized to the average of siControl)
Cycloheximide	NA	1	54366074	1250988716	456271324	1208716108	0.119153	0.123533
siControl	1	2	431007895	1627743645	477253330	1170863674	0.903101	0.936299
siPABPC1	1	3	432959316	1662189684	519047369	1230944093	0.834142	0.864805
siPABPC1&4	1	4	307235925	1466572209	451955124	1162871274	0.679793	0.704782
siControl	2	5	398137877	1589921617	418897134	1149027234	0.950443	0.985381
siPABPC1	2	6	403189131	1593322201	462890648	1153638776	0.871025	0.903043
siPABPC1&4	2	7	365719016	1588158056	464033123	1153827179	0.788131	0.817103
siControl	3	8	498920370	1651842622	479691077	1150324187	1.04009	1.07832
siPABPC1	3	9	508226860	1659545604	484883759	1154589299	1.04814	1.08667
siPABPC1&4	3	10	453613511	1703029215	561334688	1268328542	0.808098	0.837804
Figure 6D
	AID	PABPC1	GAPDH	AID_nor	PABPC1_nor	AID_rel	PABPC1_rel	mean
-IAA	16278.1	8929.86	60178.4	0.270497	0.14839	1	1	1
+IAA, 0.5h	2921.57	879.566	54681.5	0.0534289	0.0160853	0.197521	0.108399	0.15296
+IAA, 1h	95.8037	-33.8242	64092	0.00149478	-0.000527745	0.00552607	0	0.00276303
+IAA, 3h	26.5908	94.5625	78787.2	0.000337502	0.00120023	0.00124771	0.00808833	0.00466802
