# Supplementary material for: The molecular basis of coupling between poly(A)-tail length and translational efficiency
Source: eLife. 2021 Jul 2;10:e66493. doi: 10.7554/eLife.66493 (PMC8253595; doi:10.7554/eLife.66493)
Supplement: Supplementary file 1. [file elife-66493-supp1.xlsx]

## Sheet: Table 1
Supplementary File 1. Oligonucleotides used in this study.
Oligos for RNase H northern and mRNA northern blots
Name	Sequence	Type	Source	Comment
KXU041	TTCGTTATTGTTCATTTTTGAGAACTCGCT	DNA	IDT	for RNase H digest of Rluc
KXU035	CATGTCTGGATCTACGCCCGGATCCCTCGAGGTCGACGAA	DNA	IDT	for RNase H northern blot of Rluc
KXU157	ATGACAAGGTGCGGCTCCCTAGGCCCCTCCCCTCT	DNA	IDT	for RNase H digest of human GAPDH
KXU158	AACTGGTTGAGCACAGGGTACTTTATTGATGGTAC	DNA	IDT	for RNase H northern blot of human GPADH
KXU163	ATAGTTGGTATTAGGATTAGGATTGTTGTGAAGTA	DNA	IDT	for RNase H digest of human MT-CYB
KXU164	AGGCCCATTTGAGTATTTTGTTTTCAATTAGGGAG	DNA	IDT	for RNase H northern blot of human MT-CYB
KXU189	CTCTGCTTGAGAACTTATGATGTAATTATTGCATG	DNA	IDT	for mRNA northern blot of human eIF4G2
KXU190	CCTCTAGCAGCACACTGATTTAGTTTGTAAGATTT	DNA	IDT	for mRNA northern blot of human PSMD7
KXU191	GGTTCTGCTCCTACAGATTAGGCTGACAGCTCTTG	DNA	IDT	for mRNA northern blot of human RNF114
KXU194	TGGGAGGTGATTCCTAGGGGGTTGTTTGATCCCGT	DNA	IDT	for mRNA northern blot of human MT-CYB
KXF011	ATAGGGCGAATTGGCCAAGTCGGCCATGACTTCGAAAGTTTAT	DNA	IDT	5' PCR primer for making Rluc DNA templates for random primer labeling
KXR012	TCCCTCGAGGTCGACGAATTCGTTATTGTTCATTTTTGAG	DNA	IDT	3' PCR primer for making Rluc DNA templates for random primer labeling
KXR023	CGAATTCGTCGACCTCGAGGGATAATGATCCTTCCGCAGGTTCACCT	DNA	IDT	5' PCR primer for making 18S DNA templates for random primer labeling
KXR024	CGAATTCGTCGACCTCGAGGGATGCCCCCGGCCGTCCCTCTTAATCA	DNA	IDT	3' PCR primer for making 18S DNA templates for random primer labeling
Oligos for CRISPR-Cas9-mediated genome engineering
Name	Sequence	Type	Source	Comment
KXF104	TATATATCTTGTGGAAAGGACGAAACACCGGAATTTTACCCGTTAACTGTGTTTTAGAGC	DNA	IDT	for inserting guide sequence targeting human PABPC1 into pX330-BFP
KXR104	GACTAGCCTTATTTTAACTTGCTATTTCTAGCTCTAAAACACAGTTAACGGGTAAAATTC	DNA	IDT	for inserting guide sequence targeting human PABPC1 into pX330-BFP
KXF105	ATTTTACCCGTTAACTGTTTTATTTTTAAAATCCCAGGA	DNA	IDT	for mutating the PAM downstream human PABPC1 stop codon
KXR105	TCCTGGGATTTTAAAAATAAAACAGTTAACGGGTAAAAT	DNA	IDT	for mutating the PAM downstream human PABPC1 stop codon
TAIL-seq oligos
Name	Sequence	Type	Source	Comment
3pAdpater	5PhosAGATCGGAAGAGCACACGTCT-dT•Biotin-dT•Biotin-ddC-3'	DNA with a 5′ phosphate, two internal biotins, and a 3′ terminal dideoxycytidine	IDT
A_Splint	TTCCGATCTTTTTTTTT	DNA	IDT
5pAdapterPhase1	AATGATACGGCGACCACCGAGATCTACACTCTTTCCCTACACGACGCTCTTCCGATCTrNrNrArNrNrNrNrNrN	DNA/RNA chimera	IDT	If position 3 of the sequencing read is an A, sequencing of the molecule of interest begins at position 10; note that this is also the 5p adapter used for the single-stranded ligation experiments.
5pAdapterPhase2	AATGATACGGCGACCACCGAGATCTACACTCTTTCCCTACACGACGCTCTTCCGATCTNNGANNNNNN	DNA/RNA chimera	IDT	If position 3-4 of the sequencing read is a GA, sequencing of the molecule of interest begins at position 11
5pAdapterPhase3	AATGATACGGCGACCACCGAGATCTACACTCTTTCCCTACACGACGCTCTTCCGATCTrNrNrCrGrArNrNrNrNrNrN	DNA/RNA chimera	IDT	If position 3-5 of the sequencing read is an CGA, sequencing of the molecule of interest begins at position 12
5pAdapterPhase4	AATGATACGGCGACCACCGAGATCTACACTCTTTCCCTACACGACGCTCTTCCGATCTrNrNrUrCrGrArNrNrNrNrNrN	DNA/RNA chimera	IDT	If position 3-6 of the sequencing read is an TCGA, sequencing of the molecule of interest begins at position 13
RT_Primer	CAAGCAGAAGACGGCATACGAGATBBBBBBGTGACTGGAGTTCAGACGTGTGCTCTTCCGA	DNA	IDT	BBBBBB represets the barcode, used only for sequencing cDNA with TAIL-seq
PAL-seq v3 oligos
Name	Sequence	Type	Source	Comment
KXS007	TCGTCGGCAGCGTCAGATGTGTATAAGAGACAG	DNA	IDT	Sequencing primer
KXS008	AATGATACGGCGACCACCGAGATCTACACTCGTCGGCAGCGTCAGATGTGTATA	DNA	IDT	RT primer
KXS009	GTACATGCTTTTTTTT	DNA	IDT	A splint
KXS010	GTACATGCATTTTTTT	DNA	IDT	U splint
KXS011	/5Phos/GCATGTACBBBBBBCTGTCTCTTATACACATCTGACGCTGCCGACGA/iBiodT//3ddC/	DNA	IDT	3' adapter, BBBBBB represets the barcode
5p_adapter_PailSeq	CAAGCAGAAGACGGCArUrArCrGrArGrArUr(N:25252525)r(N)r(N)r(N)	DNA/RNA chimera	IDT	5' adapter
PAL-seq v4 oligos
Name	Sequence	Type	Source	Comment
KXS009	GTACATGCTTTTTTTT	DNA	IDT	A splint
KXS010	GTACATGCATTTTTTT	DNA	IDT	U splint
KXS018	/5Phos/GCATGTACATACGGCTGTCTCTTATACACATCTGACGCTGCCGACGA/iBiodT//3ddC/	DNA	IDT	3' adapter
5p_adapter_PailSeq	CAAGCAGAAGACGGCArUrArCrGrArGrArUr(N:25252525)r(N)r(N)r(N)	DNA/RNA chimera	IDT	5' adapter
KXS068	AATGATACGGCGACCACCGAGATCTACACTCNNNNNBBBBBBGCGTCAGATGTGTATAAGAGACAGCC	DNA	IDT	RT primer, BBBBBB represets the barcode
KXS078	AATGATACGGCGACCACCGAGATCTACACTC	DNA	IDT	read1 sequencing primer
KXS079	GCGTCAGATGTGTATAAGAGACAGCCGTATGTACATGC	DNA	IDT	read2 sequencing primer
Mutagenesis oligos
Name	Sequence	Type	Source	Comment
KXF041	ATTGATAAAATGAATGGCGCGCTTCTCAATGACCGCAAA	DNA	IDT	for indroducing M161A mutation in frog PABPC1
KXR046	TTTGCGGTCATTGAGAAGCGCGCCATTCATTTTATCAAT	DNA	IDT	for indroducing M161A mutation in frog PABPC1
KXF188	GCAACATATTCATTAAAAATCTGGATAAGTCTATAGACAACAAAGCACTGTATGATACAT	DNA	IDT	for indroducing silent mutations D107, K108, S109 in human PABPC1
KXR188	ATGTATCATACAGTGCTTTGTTGTCTATAGACTTATCCAGATTTTTAATGAATATGTTGC	DNA	IDT	for introducing silent mutations D107, K108, S109 in human PABPC1
KXF167	TCATTAAAAATCTGGACAAATCCATAGACAACAAAGCACTGTATGATACATTTTCTG	DNA	IDT	for introducing silent mutations I110, D111, N112 in human PABPC1
KXR167	CAGAAAATGTATCATACAGTGCTTTGTTGTCTATGGATTTGTCCAGATTTTTAATGA	DNA	IDT	for introducing silent mutations I110, D111, N112 in human PABPC1
KXF168	AACATCCTTTCATGTAAGGTGGTATGCGATGAAAATGGTTCCAAGGG	DNA	IDT	for introducing silent mutations I131, C132 in human PABPC1
KXR168	CCCTTGGAACCATTTTCATCGCATACCACCTTACATGAAAGGATGTT	DNA	IDT	for introducing silent mutations I131, C132 in human PABPC1
KXF190	AAGATGCACAGAAAGCTGTGGACGAAATGAATGGTAAGGAGCTCAATGGA	DNA	IDT	for introducing silent mutations D249, E250 in human PABPC1
KXR190	TCCATTGAGCTCCTTACCATTCATTTCGTCCACAGCTTTCTGTGCATCTT	DNA	IDT	for introducing silent mutations D249, E250 in human PABPC1
KXF169	GAAAGCTGTGGATGAGATGAATGGTAAGGAGCTCAATGGAAAACAA	DNA	IDT	for introducing silent mutations N252, G253 in human PABPC1
KXR169	TTGTTTTCCATTGAGCTCCTTACCATTCATCTCATCCACAGCTTTC	DNA	IDT	for introducing silent mutations N252, G253 in human PABPC1
KXF215	CTGGATAAGTCTCTAGAAAACAAAGCACTGTATGAAACATTTTCTGGTTTTGGTAACATC	DNA	IDT	for introducing substitutions I110L, D111E, D117E, A121G in human PABPC1
KXR215	GATGTTACCAAAACCAGAAAATGTTTCATACAGTGCTTTGTTTTCTAGAGACTTATCCAG	DNA	IDT	for introducing substitutions I110L, D111E, D117E, A121G in human PABPC1
KXF216	GAAAATGGTTCCAAGGCCTTTGGATTTGTACACTTTGAGAGCCAGGAAGCAGCTGAAAGA	DNA	IDT	for introducing substitutions G139A, Y140F, T147S in human PABPC1
KXR216	TCTTTCAGCTGCTTCCTGGCTCTCAAAGTGTACAAATCCAAAGGCCTTGGAACCATTTTC	DNA	IDT	for introducing substitutions G139A, Y140F, T147S in human PABPC1
KXF217	GGAATGCTCCTAAATGATAAAAAAGTATTTGTTGGACGA	DNA	IDT	for introducing substitutions R166K in human PABPC1
KXR217	TCGTCCAACAAATACTTTTTTATCATTTAGGAGCATTCC	DNA	IDT	for introducing substitutions R166K in human PABPC1
KXF191	CTCAGCGTTTGGAGATATTTTATCTTGCAAAGTTGTGTGCGATGAATACGGATCTCG	DNA	IDT	for introducing silent mutations C128, K129, V130, V131 in X. laevis ePAB-B
KXR191	CGAGATCCGTATTCATCGCACACAACTTTGCAAGATAAAATATCTCCAAACGCTGAG	DNA	IDT	for introducing silent mutations C128, K129, V130, V131 in X. laevis ePAB-B
KXF192	ACGAAGAAGCACAAAAAGCAGTTACCGAAATGAATGGTAAAGAAGTAAACGGTCGAATGG	DNA	IDT	for introducing silent mutations T249, E250, N252 in X. laevis ePAB-B
KXR192	CCATTCGACCGTTTACTTCTTTACCATTCATTTCGGTAACTGCTTTTTGTGCTTCTTCGT	DNA	IDT	for introducing silent mutations T249, E250, N252 in X. laevis ePAB-B
PCR oligos (for in vitro transcription templates)
Name	Sequence	Type	Source	Comment
KXU024	GTAAAACGACGGCCAGTGAATTGT	DNA	IDT	5' PCR primer for making DNA templates (upstream T7)
KXU025	GCAGAGCGCAGATACCAAATACTGTT	DNA	IDT	3' PCR primer for making DNA templates (downstream HDV)
KXU026	CCACCTCTGACTTGAGCGTCGAT	DNA	IDT	3' PCR primer for making DNA templates (downstream HDV)
KXU022	GCTGGGACCATGGCTAGC	DNA	IDT	3' PCR primer for making DNA templates (downstream Malat1)
KXU214	TTAAGTGGCTCTGAAAAGAGCCTTTGCATGTCTGGATCTACGCC	DNA	IDT	3' PCR primer for making DNA templates (with a histone mRNA 3' end)
