# Supplementary material for: The molecular basis of coupling between poly(A)-tail length and translational efficiency
Source: eLife. 2021 Jul 2;10:e66493. doi: 10.7554/eLife.66493 (PMC8253595; doi:10.7554/eLife.66493)
Supplement: Supplementary file 2. [file elife-66493-supp2.xlsx]

## Sheet: Table 1
Supplementary File 2. Plasmids used in this study.
Name	Description
C022	Template for making Rluc mRNA reporter with no pA.
C031	Template for making Rluc mRNA reporter with pA30.
C033	Template for making Rluc mRNA reporter with pA63.
C034	Template for making Rluc mRNA reporter with pA98.
C035	Template for making Rluc mRNA reporter with pA120.
C054	Template for making Fluc mRNA reporter with pA124 and mutant mouse Malat1.
C071	Template for making Nluc mRNA reporter with pA29.
C093	Template for making Nluc mRNA reporter with pA63.
C098	Template for making Nluc mRNA reporter with pA139.
C077	Template for making mRNA for overexpressing frog PABPC1 (C-FLAG) in frog oocytes
C078	Template for making mRNA for overexpressing frog ePAB (C-FLAG) in frog oocytes
C079	Template for making mRNA for overexpressing eGFP in frog oocytes
C233	Template for making mRNA for overexpressing frog PABPC1 M161A mutant (C-FLAG) in frog oocytes
C150	Template for making mRNA for overexpressing human eIF4G (C-FLAG) in frog oocytes
C245	Template for making mRNA for overexpressing frog RPL3 (C-HA) in frog oocytes
C255	Template for making mRNA for overexpressing eGFP (C-FLAG+HA) in frog oocytes
C064	Plasmid for expressing frog PABPC1 (C-His) in E.coli
C119	CRISPR-Cas9 with guide targeting human PABPC1 genomic location near STOP codon
C152	Repair plasmid for introducing AID, T2A and mCherry at the C-teminus of human PABPC1
C278	For introducing multiple copies of OsTIR1 with the piggyBac system
C194	For expressing GFP in human cell lines via transfection
C204	For expressing siRNA-resistant human PABPC1 in human cell lines via transfection
C205	For expressing siRNA-resistant frog ePAB in human cell lines via transfection
C211	For expressing siRNA-resistant human PABPC1 mutant (I110L, D111E, D117E, A121G, G139A, Y140F, T147S, R166K) in human cell lines via transfection
