# Supplementary material for: The molecular basis of coupling between poly(A)-tail length and translational efficiency
Source: eLife. 2021 Jul 2;10:e66493. doi: 10.7554/eLife.66493 (PMC8253595; doi:10.7554/eLife.66493)
Supplement: Supplementary file 4. [file elife-66493-supp4.xlsx]

## Sheet: Human mito. pseudo genes
Supplementary File 4. Masked mitochondrial pseudogenes.
Chromosome	Start	End	Gene ID	Comment	Strand	Origin			Notes
chr1	633695	634376	ENSG00000248527.1	.	+	HAVANA	exon	.	gene_id "ENSG00000248527.1"; transcript_id "ENST00000514057.1"; gene_type "unprocessed_pseudogene"; gene_status "KNOWN"; gene_name "MTATP6P1"; transcript_type "unprocessed_pseudogene"; transcript_status "KNOWN"; transcript_name "MTATP6P1-001"; exon_number 1; exon_id "ENSE00002056229.1"; level 2; transcript_support_level "NA"; ont "PGO:0000005"; tag "basic"; havana_gene "OTTHUMG00000002335.2"; hav…
chr1	93925405	93926072	ENSG00000229842.2	.	-	HAVANA	exon	.	gene_id "ENSG00000229842.2"; transcript_id "ENST00000438531.1"; gene_type "unprocessed_pseudogene"; gene_status "KNOWN"; gene_name "MTATP6P13"; transcript_type "unprocessed_pseudogene"; transcript_status "KNOWN"; transcript_name "MTATP6P13-001"; exon_number 1; exon_id "ENSE00001603975.1"; level 2; transcript_support_level "NA"; ont "PGO:0000005"; tag "basic"; havana_gene "OTTHUMG00000010566.2"; h…
chr1	106802754	106803427	ENSG00000233449.1	.	-	HAVANA	exon	.	gene_id "ENSG00000233449.1"; transcript_id "ENST00000455189.1"; gene_type "processed_pseudogene"; gene_status "KNOWN"; gene_name "MTATP6P14"; transcript_type "processed_pseudogene"; transcript_status "KNOWN"; transcript_name "MTATP6P14-001"; exon_number 1; exon_id "ENSE00001612226.1"; level 2; transcript_support_level "NA"; ont "PGO:0000004"; tag "basic"; havana_gene "OTTHUMG00000010957.1"; havan…
chr2	120211053	120211715	ENSG00000236878.1	.	+	HAVANA	exon	.	gene_id "ENSG00000236878.1"; transcript_id "ENST00000445926.1"; gene_type "processed_pseudogene"; gene_status "KNOWN"; gene_name "MTATP6P26"; transcript_type "processed_pseudogene"; transcript_status "KNOWN"; transcript_name "MTATP6P26-001"; exon_number 1; exon_id "ENSE00001642265.1"; level 2; transcript_support_level "NA"; ont "PGO:0000004"; tag "basic"; havana_gene "OTTHUMG00000154461.1"; havan…
chr2	130276506	130277187	ENSG00000232990.2	.	+	HAVANA	exon	.	gene_id "ENSG00000232990.2"; transcript_id "ENST00000453315.1"; gene_type "unprocessed_pseudogene"; gene_status "KNOWN"; gene_name "MTATP6P7"; transcript_type "unprocessed_pseudogene"; transcript_status "KNOWN"; transcript_name "MTATP6P7-001"; exon_number 1; exon_id "ENSE00001644746.1"; level 2; transcript_support_level "NA"; ont "PGO:0000005"; tag "basic"; havana_gene "OTTHUMG00000153767.1"; hav…
chr2	131380915	131381590	ENSG00000236590.1	.	-	HAVANA	exon	.	gene_id "ENSG00000236590.1"; transcript_id "ENST00000427725.1"; gene_type "unprocessed_pseudogene"; gene_status "KNOWN"; gene_name "MTATP6P4"; transcript_type "unprocessed_pseudogene"; transcript_status "KNOWN"; transcript_name "MTATP6P4-001"; exon_number 1; exon_id "ENSE00001730621.1"; level 2; transcript_support_level "NA"; ont "PGO:0000005"; tag "basic"; havana_gene "OTTHUMG00000153570.1"; hav…
chr2	201550523	201551049	ENSG00000224299.1	.	+	HAVANA	exon	.	gene_id "ENSG00000224299.1"; transcript_id "ENST00000434543.1"; gene_type "unprocessed_pseudogene"; gene_status "KNOWN"; gene_name "MTATP6P16"; transcript_type "unprocessed_pseudogene"; transcript_status "KNOWN"; transcript_name "MTATP6P16-001"; exon_number 1; exon_id "ENSE00001704095.1"; level 2; transcript_support_level "NA"; ont "PGO:0000005"; tag "basic"; havana_gene "OTTHUMG00000154759.1"; h…
chr2	202615768	202616440	ENSG00000235433.1	.	+	HAVANA	exon	.	gene_id "ENSG00000235433.1"; transcript_id "ENST00000431030.1"; gene_type "unprocessed_pseudogene"; gene_status "KNOWN"; gene_name "MTATP6P17"; transcript_type "unprocessed_pseudogene"; transcript_status "KNOWN"; transcript_name "MTATP6P17-001"; exon_number 1; exon_id "ENSE00001597336.1"; level 2; transcript_support_level "NA"; ont "PGO:0000005"; tag "basic"; havana_gene "OTTHUMG00000154677.1"; h…
chr3	106897670	106898268	ENSG00000249580.1	.	-	HAVANA	exon	.	gene_id "ENSG00000249580.1"; transcript_id "ENST00000507369.1"; gene_type "unprocessed_pseudogene"; gene_status "KNOWN"; gene_name "MTATP6P22"; transcript_type "unprocessed_pseudogene"; transcript_status "KNOWN"; transcript_name "MTATP6P22-001"; exon_number 1; exon_id "ENSE00002025686.1"; level 2; transcript_support_level "NA"; ont "PGO:0000005"; tag "basic"; havana_gene "OTTHUMG00000159145.1"; h…
chr4	155457960	155458640	ENSG00000248420.1	.	-	HAVANA	exon	.	gene_id "ENSG00000248420.1"; transcript_id "ENST00000515039.1"; gene_type "unprocessed_pseudogene"; gene_status "KNOWN"; gene_name "MTATP6P9"; transcript_type "unprocessed_pseudogene"; transcript_status "KNOWN"; transcript_name "MTATP6P9-001"; exon_number 1; exon_id "ENSE00002082138.1"; level 2; transcript_support_level "NA"; ont "PGO:0000005"; tag "basic"; havana_gene "OTTHUMG00000161818.1"; hav…
chr5	100051919	100052597	ENSG00000270307.1	.	-	HAVANA	exon	.	gene_id "ENSG00000270307.1"; transcript_id "ENST00000603319.1"; gene_type "processed_pseudogene"; gene_status "KNOWN"; gene_name "MTATP6P2"; transcript_type "processed_pseudogene"; transcript_status "KNOWN"; transcript_name "MTATP6P2-001"; exon_number 1; exon_id "ENSE00003545568.1"; level 2; transcript_support_level "NA"; ont "PGO:0000004"; tag "basic"; havana_gene "OTTHUMG00000185133.1"; havana_…
chr6	91726809	91727070	ENSG00000262095.1	.	+	HAVANA	exon	.	gene_id "ENSG00000262095.1"; transcript_id "ENST00000574491.1"; gene_type "processed_pseudogene"; gene_status "KNOWN"; gene_name "MTATP6P25"; transcript_type "processed_pseudogene"; transcript_status "KNOWN"; transcript_name "MTATP6P25-001"; exon_number 1; exon_id "ENSE00002638158.1"; level 2; transcript_support_level "NA"; ont "PGO:0000004"; tag "basic"; havana_gene "OTTHUMG00000177315.1"; havan…
chr6	153666626	153667318	ENSG00000218776.4	.	+	HAVANA	exon	.	gene_id "ENSG00000218776.4"; transcript_id "ENST00000406985.2"; gene_type "processed_pseudogene"; gene_status "KNOWN"; gene_name "MTATP6P31"; transcript_type "processed_pseudogene"; transcript_status "KNOWN"; transcript_name "MTATP6P31-001"; exon_number 1; exon_id "ENSE00001553405.2"; level 2; transcript_support_level "NA"; ont "PGO:0000004"; tag "basic"; havana_gene "OTTHUMG00000015863.2"; havan…
chr7	64107455	64107572	ENSG00000227035.1	.	-	HAVANA	exon	.	gene_id "ENSG00000227035.1"; transcript_id "ENST00000417994.1"; gene_type "unprocessed_pseudogene"; gene_status "KNOWN"; gene_name "MTATP6P18"; transcript_type "unprocessed_pseudogene"; transcript_status "KNOWN"; transcript_name "MTATP6P18-001"; exon_number 1; exon_id "ENSE00001788941.1"; level 2; transcript_support_level "NA"; ont "PGO:0000005"; tag "basic"; havana_gene "OTTHUMG00000156484.1"; h…
chr7	64106821	64107377	ENSG00000227035.1	.	-	HAVANA	exon	.	gene_id "ENSG00000227035.1"; transcript_id "ENST00000417994.1"; gene_type "unprocessed_pseudogene"; gene_status "KNOWN"; gene_name "MTATP6P18"; transcript_type "unprocessed_pseudogene"; transcript_status "KNOWN"; transcript_name "MTATP6P18-001"; exon_number 2; exon_id "ENSE00001698955.1"; level 2; transcript_support_level "NA"; ont "PGO:0000005"; tag "basic"; havana_gene "OTTHUMG00000156484.1"; h…
chr7	67627830	67628019	ENSG00000226392.1	.	+	HAVANA	exon	.	gene_id "ENSG00000226392.1"; transcript_id "ENST00000440681.1"; gene_type "unprocessed_pseudogene"; gene_status "KNOWN"; gene_name "MTATP6P21"; transcript_type "unprocessed_pseudogene"; transcript_status "KNOWN"; transcript_name "MTATP6P21-001"; exon_number 1; exon_id "ENSE00001652085.1"; level 2; transcript_support_level "NA"; ont "PGO:0000005"; tag "basic"; havana_gene "OTTHUMG00000156572.1"; h…
chr9	5099559	5100229	ENSG00000228097.1	.	+	HAVANA	exon	.	gene_id "ENSG00000228097.1"; transcript_id "ENST00000428071.1"; gene_type "unprocessed_pseudogene"; gene_status "KNOWN"; gene_name "MTATP6P11"; transcript_type "unprocessed_pseudogene"; transcript_status "KNOWN"; transcript_name "MTATP6P11-001"; exon_number 1; exon_id "ENSE00001681166.1"; level 2; transcript_support_level "NA"; ont "PGO:0000005"; tag "basic"; havana_gene "OTTHUMG00000019478.1"; h…
chr9	31505279	31505943	ENSG00000226998.1	.	+	HAVANA	exon	.	gene_id "ENSG00000226998.1"; transcript_id "ENST00000443540.1"; gene_type "unprocessed_pseudogene"; gene_status "KNOWN"; gene_name "MTATP6P30"; transcript_type "unprocessed_pseudogene"; transcript_status "KNOWN"; transcript_name "MTATP6P30-001"; exon_number 1; exon_id "ENSE00001732342.1"; level 2; transcript_support_level "NA"; ont "PGO:0000005"; tag "basic"; havana_gene "OTTHUMG00000019736.1"; h…
chr9	92108857	92108989	ENSG00000232179.1	.	+	HAVANA	exon	.	gene_id "ENSG00000232179.1"; transcript_id "ENST00000415057.1"; gene_type "unprocessed_pseudogene"; gene_status "KNOWN"; gene_name "MTATP6P29"; transcript_type "unprocessed_pseudogene"; transcript_status "KNOWN"; transcript_name "MTATP6P29-001"; exon_number 1; exon_id "ENSE00001638910.1"; level 2; transcript_support_level "NA"; ont "PGO:0000005"; tag "basic"; havana_gene "OTTHUMG00000021035.1"; h…
chr10	69589879	69590355	ENSG00000230755.1	.	-	HAVANA	exon	.	gene_id "ENSG00000230755.1"; transcript_id "ENST00000440153.1"; gene_type "processed_pseudogene"; gene_status "KNOWN"; gene_name "MTATP6P23"; transcript_type "processed_pseudogene"; transcript_status "KNOWN"; transcript_name "MTATP6P23-001"; exon_number 1; exon_id "ENSE00001614071.1"; level 2; transcript_support_level "NA"; ont "PGO:0000004"; tag "basic"; havana_gene "OTTHUMG00000018390.1"; havan…
chr11	103402587	103403422	ENSG00000254931.2	.	-	HAVANA	exon	.	gene_id "ENSG00000254931.2"; transcript_id "ENST00000527233.2"; gene_type "processed_pseudogene"; gene_status "KNOWN"; gene_name "MTATP6P15"; transcript_type "processed_pseudogene"; transcript_status "KNOWN"; transcript_name "MTATP6P15-001"; exon_number 1; exon_id "ENSE00002181024.2"; level 2; transcript_support_level "NA"; ont "PGO:0000004"; tag "basic"; havana_gene "OTTHUMG00000165943.2"; havan…
chr16	10724619	10725296	ENSG00000262381.1	.	-	HAVANA	exon	.	gene_id "ENSG00000262381.1"; transcript_id "ENST00000576835.1"; gene_type "unprocessed_pseudogene"; gene_status "KNOWN"; gene_name "MTATP6P24"; transcript_type "unprocessed_pseudogene"; transcript_status "KNOWN"; transcript_name "MTATP6P24-001"; exon_number 1; exon_id "ENSE00002635437.1"; level 2; transcript_support_level "NA"; ont "PGO:0000005"; tag "basic"; havana_gene "OTTHUMG00000177351.1"; h…
chr17	22529933	22530609	ENSG00000263483.1	.	+	HAVANA	exon	.	gene_id "ENSG00000263483.1"; transcript_id "ENST00000581686.1"; gene_type "unprocessed_pseudogene"; gene_status "KNOWN"; gene_name "MTATP6P3"; transcript_type "unprocessed_pseudogene"; transcript_status "KNOWN"; transcript_name "MTATP6P3-001"; exon_number 1; exon_id "ENSE00002686454.1"; level 2; transcript_support_level "NA"; ont "PGO:0000005"; tag "basic"; havana_gene "OTTHUMG00000179092.2"; hav…
chr19	12506248	12506261	ENSG00000234003.1	.	+	HAVANA	exon	.	gene_id "ENSG00000234003.1"; transcript_id "ENST00000416987.1"; gene_type "unprocessed_pseudogene"; gene_status "KNOWN"; gene_name "MTATP6P27"; transcript_type "unprocessed_pseudogene"; transcript_status "KNOWN"; transcript_name "MTATP6P27-001"; exon_number 1; exon_id "ENSE00001619067.1"; level 2; transcript_support_level "NA"; ont "PGO:0000005"; tag "basic"; havana_gene "OTTHUMG00000156410.1"; h…
chr19	12506587	12506669	ENSG00000234003.1	.	+	HAVANA	exon	.	gene_id "ENSG00000234003.1"; transcript_id "ENST00000416987.1"; gene_type "unprocessed_pseudogene"; gene_status "KNOWN"; gene_name "MTATP6P27"; transcript_type "unprocessed_pseudogene"; transcript_status "KNOWN"; transcript_name "MTATP6P27-001"; exon_number 2; exon_id "ENSE00001637465.1"; level 2; transcript_support_level "NA"; ont "PGO:0000005"; tag "basic"; havana_gene "OTTHUMG00000156410.1"; h…
chr19	12507004	12507050	ENSG00000234003.1	.	+	HAVANA	exon	.	gene_id "ENSG00000234003.1"; transcript_id "ENST00000416987.1"; gene_type "unprocessed_pseudogene"; gene_status "KNOWN"; gene_name "MTATP6P27"; transcript_type "unprocessed_pseudogene"; transcript_status "KNOWN"; transcript_name "MTATP6P27-001"; exon_number 3; exon_id "ENSE00001698481.1"; level 2; transcript_support_level "NA"; ont "PGO:0000005"; tag "basic"; havana_gene "OTTHUMG00000156410.1"; h…
chr19	12507550	12508030	ENSG00000234003.1	.	+	HAVANA	exon	.	gene_id "ENSG00000234003.1"; transcript_id "ENST00000416987.1"; gene_type "unprocessed_pseudogene"; gene_status "KNOWN"; gene_name "MTATP6P27"; transcript_type "unprocessed_pseudogene"; transcript_status "KNOWN"; transcript_name "MTATP6P27-001"; exon_number 4; exon_id "ENSE00001742124.1"; level 2; transcript_support_level "NA"; ont "PGO:0000005"; tag "basic"; havana_gene "OTTHUMG00000156410.1"; h…
chr22	36174260	36174822	ENSG00000237948.1	.	+	HAVANA	exon	.	gene_id "ENSG00000237948.1"; transcript_id "ENST00000414147.1"; gene_type "processed_pseudogene"; gene_status "KNOWN"; gene_name "MTATP6P20"; transcript_type "processed_pseudogene"; transcript_status "KNOWN"; transcript_name "MTATP6P20-001"; exon_number 1; exon_id "ENSE00001673835.1"; level 2; transcript_support_level "NA"; ont "PGO:0000004"; tag "basic"; havana_gene "OTTHUMG00000150639.1"; havan…
chrX	102798395	102798962	ENSG00000228316.1	.	+	HAVANA	exon	.	gene_id "ENSG00000228316.1"; transcript_id "ENST00000413797.1"; gene_type "processed_pseudogene"; gene_status "KNOWN"; gene_name "MTATP6P19"; transcript_type "processed_pseudogene"; transcript_status "KNOWN"; transcript_name "MTATP6P19-001"; exon_number 1; exon_id "ENSE00001676623.1"; level 2; transcript_support_level "NA"; ont "PGO:0000004"; tag "basic"; havana_gene "OTTHUMG00000022071.1"; havan…
chrX	102799468	102799560	ENSG00000228316.1	.	+	HAVANA	exon	.	gene_id "ENSG00000228316.1"; transcript_id "ENST00000413797.1"; gene_type "processed_pseudogene"; gene_status "KNOWN"; gene_name "MTATP6P19"; transcript_type "processed_pseudogene"; transcript_status "KNOWN"; transcript_name "MTATP6P19-001"; exon_number 2; exon_id "ENSE00001771850.1"; level 2; transcript_support_level "NA"; ont "PGO:0000004"; tag "basic"; havana_gene "OTTHUMG00000022071.1"; havan…
chr1	633534	633741	ENSG00000240409.1	.	+	HAVANA	exon	.	gene_id "ENSG00000240409.1"; transcript_id "ENST00000467115.1"; gene_type "unprocessed_pseudogene"; gene_status "KNOWN"; gene_name "MTATP8P1"; transcript_type "unprocessed_pseudogene"; transcript_status "KNOWN"; transcript_name "MTATP8P1-001"; exon_number 1; exon_id "ENSE00001887928.1"; level 2; transcript_support_level "NA"; ont "PGO:0000005"; tag "basic"; havana_gene "OTTHUMG00000002473.1"; hav…
chr2	87824941	87825143	ENSG00000229604.2	.	+	HAVANA	exon	.	gene_id "ENSG00000229604.2"; transcript_id "ENST00000435212.2"; gene_type "processed_pseudogene"; gene_status "KNOWN"; gene_name "MTATP8P2"; transcript_type "processed_pseudogene"; transcript_status "KNOWN"; transcript_name "MTATP8P2-001"; exon_number 1; exon_id "ENSE00001679075.2"; level 2; transcript_support_level "NA"; ont "PGO:0000004"; tag "basic"; havana_gene "OTTHUMG00000153275.2"; havana_…
chr1	631073	632616	ENSG00000237973.1	.	+	HAVANA	exon	.	gene_id "ENSG00000237973.1"; transcript_id "ENST00000414273.1"; gene_type "unprocessed_pseudogene"; gene_status "KNOWN"; gene_name "MTCO1P12"; transcript_type "unprocessed_pseudogene"; transcript_status "KNOWN"; transcript_name "MTCO1P12-001"; exon_number 1; exon_id "ENSE00001795950.1"; level 2; transcript_support_level "NA"; ont "PGO:0000005"; tag "basic"; havana_gene "OTTHUMG00000002333.2"; hav…
chr1	93927713	93928302	ENSG00000226960.1	.	-	HAVANA	exon	.	gene_id "ENSG00000226960.1"; transcript_id "ENST00000416634.1"; gene_type "unprocessed_pseudogene"; gene_status "KNOWN"; gene_name "MTCO1P21"; transcript_type "unprocessed_pseudogene"; transcript_status "KNOWN"; transcript_name "MTCO1P21-001"; exon_number 1; exon_id "ENSE00001767236.1"; level 2; transcript_support_level "NA"; ont "PGO:0000005"; tag "basic"; havana_gene "OTTHUMG00000010563.2"; hav…
chr1	106804473	106806032	ENSG00000232551.2	.	-	HAVANA	exon	.	gene_id "ENSG00000232551.2"; transcript_id "ENST00000441695.2"; gene_type "processed_pseudogene"; gene_status "KNOWN"; gene_name "MTCO1P14"; transcript_type "processed_pseudogene"; transcript_status "KNOWN"; transcript_name "MTCO1P14-001"; exon_number 1; exon_id "ENSE00001699119.2"; level 2; transcript_support_level "NA"; ont "PGO:0000004"; tag "basic"; havana_gene "OTTHUMG00000010955.3"; havana_…
chr2	50588689	50589415	ENSG00000230327.1	.	-	HAVANA	exon	.	gene_id "ENSG00000230327.1"; transcript_id "ENST00000457379.1"; gene_type "processed_pseudogene"; gene_status "KNOWN"; gene_name "MTCO1P42"; transcript_type "processed_pseudogene"; transcript_status "KNOWN"; transcript_name "MTCO1P42-001"; exon_number 1; exon_id "ENSE00001727114.1"; level 2; transcript_support_level "NA"; ont "PGO:0000004"; tag "basic"; havana_gene "OTTHUMG00000151798.2"; havana_…
chr2	94899565	94900661	ENSG00000237055.1	.	-	HAVANA	exon	.	gene_id "ENSG00000237055.1"; transcript_id "ENST00000448024.1"; gene_type "processed_pseudogene"; gene_status "KNOWN"; gene_name "MTCO1P48"; transcript_type "processed_pseudogene"; transcript_status "KNOWN"; transcript_name "MTCO1P48-001"; exon_number 1; exon_id "ENSE00001720188.1"; level 2; transcript_support_level "NA"; ont "PGO:0000004"; tag "basic"; havana_gene "OTTHUMG00000155136.1"; havana_…
chr2	117026536	117027024	ENSG00000228898.1	.	+	HAVANA	exon	.	gene_id "ENSG00000228898.1"; transcript_id "ENST00000431831.1"; gene_type "unprocessed_pseudogene"; gene_status "KNOWN"; gene_name "MTCO1P43"; transcript_type "unprocessed_pseudogene"; transcript_status "KNOWN"; transcript_name "MTCO1P43-001"; exon_number 1; exon_id "ENSE00001606758.1"; level 2; transcript_support_level "NA"; ont "PGO:0000005"; tag "basic"; havana_gene "OTTHUMG00000153404.1"; hav…
chr2	130273907	130275449	ENSG00000236211.1	.	+	HAVANA	exon	.	gene_id "ENSG00000236211.1"; transcript_id "ENST00000419523.1"; gene_type "unprocessed_pseudogene"; gene_status "KNOWN"; gene_name "MTCO1P7"; transcript_type "unprocessed_pseudogene"; transcript_status "KNOWN"; transcript_name "MTCO1P7-001"; exon_number 1; exon_id "ENSE00001628983.1"; level 2; transcript_support_level "NA"; ont "PGO:0000005"; tag "basic"; havana_gene "OTTHUMG00000153771.1"; havan…
chr2	131382642	131384061	ENSG00000237910.1	.	-	HAVANA	exon	.	gene_id "ENSG00000237910.1"; transcript_id "ENST00000455518.1"; gene_type "unprocessed_pseudogene"; gene_status "KNOWN"; gene_name "MTCO1P18"; transcript_type "unprocessed_pseudogene"; transcript_status "KNOWN"; transcript_name "MTCO1P18-001"; exon_number 1; exon_id "ENSE00001796819.1"; level 2; transcript_support_level "NA"; ont "PGO:0000005"; tag "basic"; havana_gene "OTTHUMG00000153565.2"; hav…
chr2	140216996	140217239	ENSG00000227149.1	.	-	HAVANA	exon	.	gene_id "ENSG00000227149.1"; transcript_id "ENST00000441935.1"; gene_type "processed_pseudogene"; gene_status "KNOWN"; gene_name "MTCO1P44"; transcript_type "processed_pseudogene"; transcript_status "KNOWN"; transcript_name "MTCO1P44-001"; exon_number 1; exon_id "ENSE00001783364.1"; level 2; transcript_support_level "NA"; ont "PGO:0000004"; tag "not_organism_supported"; tag "basic"; havana_gene "…
chr2	155263457	155263724	ENSG00000232982.1	.	-	HAVANA	exon	.	gene_id "ENSG00000232982.1"; transcript_id "ENST00000431457.1"; gene_type "processed_pseudogene"; gene_status "KNOWN"; gene_name "MTCO1P45"; transcript_type "processed_pseudogene"; transcript_status "KNOWN"; transcript_name "MTCO1P45-001"; exon_number 1; exon_id "ENSE00001630748.1"; level 2; transcript_support_level "NA"; ont "PGO:0000004"; tag "not_organism_supported"; tag "basic"; havana_gene "…
chr2	202614213	202614704	ENSG00000223619.1	.	+	HAVANA	exon	.	gene_id "ENSG00000223619.1"; transcript_id "ENST00000411522.1"; gene_type "unprocessed_pseudogene"; gene_status "KNOWN"; gene_name "MTCO1P17"; transcript_type "unprocessed_pseudogene"; transcript_status "KNOWN"; transcript_name "MTCO1P17-001"; exon_number 1; exon_id "ENSE00001617346.1"; level 2; transcript_support_level "NA"; ont "PGO:0000005"; tag "basic"; havana_gene "OTTHUMG00000154675.1"; hav…
chr2	202619184	202619896	ENSG00000233311.1	.	-	HAVANA	exon	.	gene_id "ENSG00000233311.1"; transcript_id "ENST00000430139.1"; gene_type "processed_pseudogene"; gene_status "KNOWN"; gene_name "MTCO1P54"; transcript_type "processed_pseudogene"; transcript_status "KNOWN"; transcript_name "MTCO1P54-001"; exon_number 1; exon_id "ENSE00001707850.1"; level 2; transcript_support_level "NA"; ont "PGO:0000004"; tag "basic"; havana_gene "OTTHUMG00000154673.1"; havana_…
chr2	211778272	211779763	ENSG00000236007.1	.	+	HAVANA	exon	.	gene_id "ENSG00000236007.1"; transcript_id "ENST00000451639.1"; gene_type "processed_pseudogene"; gene_status "KNOWN"; gene_name "MTCO1P46"; transcript_type "processed_pseudogene"; transcript_status "KNOWN"; transcript_name "MTCO1P46-001"; exon_number 1; exon_id "ENSE00001618966.1"; level 2; transcript_support_level "NA"; ont "PGO:0000004"; tag "basic"; havana_gene "OTTHUMG00000154767.3"; havana_…
chr3	12165298	12165642	ENSG00000233026.1	.	-	HAVANA	exon	.	gene_id "ENSG00000233026.1"; transcript_id "ENST00000433573.1"; gene_type "processed_pseudogene"; gene_status "KNOWN"; gene_name "MTCO1P5"; transcript_type "processed_pseudogene"; transcript_status "KNOWN"; transcript_name "MTCO1P5-001"; exon_number 1; exon_id "ENSE00001704062.1"; level 2; transcript_support_level "NA"; ont "PGO:0000004"; tag "basic"; havana_gene "OTTHUMG00000155369.1"; havana_tr…
chr3	89588713	89590097	ENSG00000240309.1	.	-	HAVANA	exon	.	gene_id "ENSG00000240309.1"; transcript_id "ENST00000481192.1"; gene_type "processed_pseudogene"; gene_status "KNOWN"; gene_name "MTCO1P6"; transcript_type "processed_pseudogene"; transcript_status "KNOWN"; transcript_name "MTCO1P6-001"; exon_number 1; exon_id "ENSE00001845594.1"; level 2; transcript_support_level "NA"; ont "PGO:0000004"; tag "basic"; havana_gene "OTTHUMG00000159038.1"; havana_tr…
chr3	106900853	106901081	ENSG00000250630.1	.	-	HAVANA	exon	.	gene_id "ENSG00000250630.1"; transcript_id "ENST00000515270.1"; gene_type "unprocessed_pseudogene"; gene_status "KNOWN"; gene_name "MTCO1P35"; transcript_type "unprocessed_pseudogene"; transcript_status "KNOWN"; transcript_name "MTCO1P35-001"; exon_number 1; exon_id "ENSE00002086965.1"; level 2; transcript_support_level "NA"; ont "PGO:0000005"; tag "basic"; havana_gene "OTTHUMG00000159143.1"; hav…
chr3	120722023	120722311	ENSG00000240452.1	.	+	HAVANA	exon	.	gene_id "ENSG00000240452.1"; transcript_id "ENST00000496868.1"; gene_type "unprocessed_pseudogene"; gene_status "KNOWN"; gene_name "MTCO1P29"; transcript_type "unprocessed_pseudogene"; transcript_status "KNOWN"; transcript_name "MTCO1P29-001"; exon_number 1; exon_id "ENSE00001827480.1"; level 2; transcript_support_level "NA"; ont "PGO:0000005"; tag "basic"; havana_gene "OTTHUMG00000159663.1"; hav…
chr4	155459703	155461237	ENSG00000251223.1	.	-	HAVANA	exon	.	gene_id "ENSG00000251223.1"; transcript_id "ENST00000505577.1"; gene_type "unprocessed_pseudogene"; gene_status "KNOWN"; gene_name "MTCO1P9"; transcript_type "unprocessed_pseudogene"; transcript_status "KNOWN"; transcript_name "MTCO1P9-001"; exon_number 1; exon_id "ENSE00002070683.1"; level 2; transcript_support_level "NA"; ont "PGO:0000005"; tag "basic"; havana_gene "OTTHUMG00000161811.1"; havan…
chr5	5395377	5395957	ENSG00000248729.1	.	-	HAVANA	exon	.	gene_id "ENSG00000248729.1"; transcript_id "ENST00000515244.1"; gene_type "processed_pseudogene"; gene_status "KNOWN"; gene_name "MTCO1P30"; transcript_type "processed_pseudogene"; transcript_status "KNOWN"; transcript_name "MTCO1P30-001"; exon_number 1; exon_id "ENSE00002022953.1"; level 2; transcript_support_level "NA"; ont "PGO:0000004"; tag "basic"; havana_gene "OTTHUMG00000161666.1"; havana_…
chr5	5396476	5396968	ENSG00000251476.2	.	-	HAVANA	exon	.	gene_id "ENSG00000251476.2"; transcript_id "ENST00000506355.2"; gene_type "processed_pseudogene"; gene_status "KNOWN"; gene_name "MTCO1P31"; transcript_type "processed_pseudogene"; transcript_status "KNOWN"; transcript_name "MTCO1P31-001"; exon_number 1; exon_id "ENSE00002023355.2"; level 2; transcript_support_level "NA"; ont "PGO:0000004"; tag "basic"; havana_gene "OTTHUMG00000161664.2"; havana_…
chr5	98410234	98411792	ENSG00000249448.1	.	-	HAVANA	exon	.	gene_id "ENSG00000249448.1"; transcript_id "ENST00000515438.1"; gene_type "processed_pseudogene"; gene_status "KNOWN"; gene_name "MTCO1P24"; transcript_type "processed_pseudogene"; transcript_status "KNOWN"; transcript_name "MTCO1P24-001"; exon_number 1; exon_id "ENSE00002081853.1"; level 2; transcript_support_level "NA"; ont "PGO:0000004"; tag "basic"; havana_gene "OTTHUMG00000162709.1"; havana_…
chr5	100053685	100055045	ENSG00000271207.1	.	-	HAVANA	exon	.	gene_id "ENSG00000271207.1"; transcript_id "ENST00000604619.1"; gene_type "processed_pseudogene"; gene_status "KNOWN"; gene_name "MTCO1P22"; transcript_type "processed_pseudogene"; transcript_status "KNOWN"; transcript_name "MTCO1P22-001"; exon_number 1; exon_id "ENSE00003607779.1"; level 2; transcript_support_level "NA"; ont "PGO:0000004"; tag "basic"; havana_gene "OTTHUMG00000185135.1"; havana_…
chr6	91727281	91727505	ENSG00000220340.1	.	-	HAVANA	exon	.	gene_id "ENSG00000220340.1"; transcript_id "ENST00000401674.1"; gene_type "processed_pseudogene"; gene_status "KNOWN"; gene_name "MTCO1P56"; transcript_type "processed_pseudogene"; transcript_status "KNOWN"; transcript_name "MTCO1P56-001"; exon_number 1; exon_id "ENSE00001561440.1"; level 2; transcript_support_level "NA"; ont "PGO:0000004"; tag "basic"; havana_gene "OTTHUMG00000015219.1"; havana_…
chr7	64108624	64110147	ENSG00000234700.1	.	-	HAVANA	exon	.	gene_id "ENSG00000234700.1"; transcript_id "ENST00000416914.1"; gene_type "unprocessed_pseudogene"; gene_status "KNOWN"; gene_name "MTCO1P8"; transcript_type "unprocessed_pseudogene"; transcript_status "KNOWN"; transcript_name "MTCO1P8-001"; exon_number 1; exon_id "ENSE00001634492.1"; level 2; transcript_support_level "NA"; ont "PGO:0000005"; tag "basic"; havana_gene "OTTHUMG00000156474.1"; havan…
chr7	69331834	69333633	ENSG00000229031.1	.	-	HAVANA	exon	.	gene_id "ENSG00000229031.1"; transcript_id "ENST00000414449.1"; gene_type "unprocessed_pseudogene"; gene_status "KNOWN"; gene_name "MTCO1P25"; transcript_type "unprocessed_pseudogene"; transcript_status "KNOWN"; transcript_name "MTCO1P25-001"; exon_number 1; exon_id "ENSE00001678288.1"; level 2; transcript_support_level "NA"; ont "PGO:0000005"; tag "basic"; havana_gene "OTTHUMG00000156609.1"; hav…
chr7	141801314	141802059	ENSG00000241926.1	.	-	HAVANA	exon	.	gene_id "ENSG00000241926.1"; transcript_id "ENST00000489829.1"; gene_type "processed_pseudogene"; gene_status "KNOWN"; gene_name "MTCO1P55"; transcript_type "processed_pseudogene"; transcript_status "KNOWN"; transcript_name "MTCO1P55-001"; exon_number 1; exon_id "ENSE00001878033.1"; level 2; transcript_support_level "NA"; ont "PGO:0000004"; tag "basic"; havana_gene "OTTHUMG00000157633.1"; havana_…
chr8	103088795	103088955	ENSG00000253556.1	.	+	HAVANA	exon	.	gene_id "ENSG00000253556.1"; transcript_id "ENST00000520516.1"; gene_type "processed_pseudogene"; gene_status "KNOWN"; gene_name "MTCO1P4"; transcript_type "processed_pseudogene"; transcript_status "KNOWN"; transcript_name "MTCO1P4-001"; exon_number 1; exon_id "ENSE00002128495.1"; level 2; transcript_support_level "NA"; ont "PGO:0000004"; tag "basic"; havana_gene "OTTHUMG00000164843.1"; havana_tr…
chr8	103089422	103090671	ENSG00000253556.1	.	+	HAVANA	exon	.	gene_id "ENSG00000253556.1"; transcript_id "ENST00000520516.1"; gene_type "processed_pseudogene"; gene_status "KNOWN"; gene_name "MTCO1P4"; transcript_type "processed_pseudogene"; transcript_status "KNOWN"; transcript_name "MTCO1P4-001"; exon_number 2; exon_id "ENSE00002137438.1"; level 2; transcript_support_level "NA"; ont "PGO:0000004"; tag "basic"; havana_gene "OTTHUMG00000164843.1"; havana_tr…
chr8	110933262	110934533	ENSG00000254241.1	.	-	HAVANA	exon	.	gene_id "ENSG00000254241.1"; transcript_id "ENST00000523889.1"; gene_type "processed_pseudogene"; gene_status "KNOWN"; gene_name "MTCO1P47"; transcript_type "processed_pseudogene"; transcript_status "KNOWN"; transcript_name "MTCO1P47-001"; exon_number 1; exon_id "ENSE00002125342.1"; level 2; transcript_support_level "NA"; ont "PGO:0000004"; tag "basic"; havana_gene "OTTHUMG00000164907.1"; havana_…
chr8	133755844	133756646	ENSG00000253916.1	.	+	HAVANA	exon	.	gene_id "ENSG00000253916.1"; transcript_id "ENST00000523429.1"; gene_type "processed_pseudogene"; gene_status "KNOWN"; gene_name "MTCO1P49"; transcript_type "processed_pseudogene"; transcript_status "KNOWN"; transcript_name "MTCO1P49-001"; exon_number 1; exon_id "ENSE00002092168.1"; level 2; transcript_support_level "NA"; ont "PGO:0000004"; tag "basic"; havana_gene "OTTHUMG00000164536.1"; havana_…
chr9	5096665	5098193	ENSG00000224083.1	.	+	HAVANA	exon	.	gene_id "ENSG00000224083.1"; transcript_id "ENST00000429111.1"; gene_type "unprocessed_pseudogene"; gene_status "KNOWN"; gene_name "MTCO1P11"; transcript_type "unprocessed_pseudogene"; transcript_status "KNOWN"; transcript_name "MTCO1P11-001"; exon_number 1; exon_id "ENSE00001634101.1"; level 2; transcript_support_level "NA"; ont "PGO:0000005"; tag "basic"; havana_gene "OTTHUMG00000019485.1"; hav…
chr9	80563570	80564630	ENSG00000232981.1	.	-	HAVANA	exon	.	gene_id "ENSG00000232981.1"; transcript_id "ENST00000427672.1"; gene_type "unprocessed_pseudogene"; gene_status "KNOWN"; gene_name "MTCO1P51"; transcript_type "unprocessed_pseudogene"; transcript_status "KNOWN"; transcript_name "MTCO1P51-001"; exon_number 1; exon_id "ENSE00001618231.1"; level 2; transcript_support_level "NA"; ont "PGO:0000005"; tag "basic"; havana_gene "OTTHUMG00000020078.1"; hav…
chr10	69591405	69592931	ENSG00000235524.1	.	-	HAVANA	exon	.	gene_id "ENSG00000235524.1"; transcript_id "ENST00000415223.1"; gene_type "processed_pseudogene"; gene_status "KNOWN"; gene_name "MTCO1P23"; transcript_type "processed_pseudogene"; transcript_status "KNOWN"; transcript_name "MTCO1P23-001"; exon_number 1; exon_id "ENSE00001683019.1"; level 2; transcript_support_level "NA"; ont "PGO:0000004"; tag "basic"; havana_gene "OTTHUMG00000018387.1"; havana_…
chr11	103404308	103405834	ENSG00000255350.1	.	-	HAVANA	exon	.	gene_id "ENSG00000255350.1"; transcript_id "ENST00000529569.1"; gene_type "processed_pseudogene"; gene_status "KNOWN"; gene_name "MTCO1P15"; transcript_type "processed_pseudogene"; transcript_status "KNOWN"; transcript_name "MTCO1P15-001"; exon_number 1; exon_id "ENSE00002142549.1"; level 2; transcript_support_level "NA"; ont "PGO:0000004"; tag "basic"; havana_gene "OTTHUMG00000165946.1"; havana_…
chr14	32484097	32484800	ENSG00000259045.1	.	-	HAVANA	exon	.	gene_id "ENSG00000259045.1"; transcript_id "ENST00000554243.1"; gene_type "unprocessed_pseudogene"; gene_status "KNOWN"; gene_name "MTCO1P2"; transcript_type "unprocessed_pseudogene"; transcript_status "KNOWN"; transcript_name "MTCO1P2-001"; exon_number 1; exon_id "ENSE00002481853.1"; level 2; transcript_support_level "NA"; ont "PGO:0000005"; tag "basic"; havana_gene "OTTHUMG00000170593.1"; havan…
chr16	3367718	3369246	ENSG00000262118.1	.	-	HAVANA	exon	.	gene_id "ENSG00000262118.1"; transcript_id "ENST00000574177.1"; gene_type "processed_pseudogene"; gene_status "KNOWN"; gene_name "MTCO1P28"; transcript_type "processed_pseudogene"; transcript_status "KNOWN"; transcript_name "MTCO1P28-001"; exon_number 1; exon_id "ENSE00002639710.1"; level 2; transcript_support_level "NA"; ont "PGO:0000004"; tag "basic"; havana_gene "OTTHUMG00000177597.1"; havana_…
chr17	19605453	19605933	ENSG00000224254.2	.	+	HAVANA	exon	.	gene_id "ENSG00000224254.2"; transcript_id "ENST00000426148.2"; gene_type "unprocessed_pseudogene"; gene_status "KNOWN"; gene_name "MTCO1P39"; transcript_type "unprocessed_pseudogene"; transcript_status "KNOWN"; transcript_name "MTCO1P39-001"; exon_number 1; exon_id "ENSE00001621360.2"; level 2; transcript_support_level "NA"; ont "PGO:0000005"; tag "basic"; havana_gene "OTTHUMG00000059470.2"; hav…
chr17	53105733	53106358	ENSG00000262902.1	.	+	HAVANA	exon	.	gene_id "ENSG00000262902.1"; transcript_id "ENST00000574371.1"; gene_type "processed_pseudogene"; gene_status "KNOWN"; gene_name "MTCO1P40"; transcript_type "processed_pseudogene"; transcript_status "KNOWN"; transcript_name "MTCO1P40-001"; exon_number 1; exon_id "ENSE00002649323.1"; level 2; transcript_support_level "NA"; ont "PGO:0000004"; tag "basic"; havana_gene "OTTHUMG00000177751.2"; havana_…
chr19	12504664	12504890	ENSG00000232579.1	.	+	HAVANA	exon	.	gene_id "ENSG00000232579.1"; transcript_id "ENST00000448269.1"; gene_type "unprocessed_pseudogene"; gene_status "KNOWN"; gene_name "MTCO1P27"; transcript_type "unprocessed_pseudogene"; transcript_status "KNOWN"; transcript_name "MTCO1P27-001"; exon_number 1; exon_id "ENSE00001738509.1"; level 2; transcript_support_level "NA"; ont "PGO:0000005"; tag "basic"; havana_gene "OTTHUMG00000156412.1"; hav…
chr21	8845565	8846646	ENSG00000280243.1	.	+	HAVANA	exon	.	gene_id "ENSG00000280243.1"; transcript_id "ENST00000624263.1"; gene_type "processed_pseudogene"; gene_status "KNOWN"; gene_name "MTCO1P1"; transcript_type "processed_pseudogene"; transcript_status "KNOWN"; transcript_name "MTCO1P1-001"; exon_number 1; exon_id "ENSE00003759772.1"; level 2; transcript_support_level "NA"; ont "PGO:0000004"; tag "basic"; havana_gene "OTTHUMG00000189421.1"; havana_tr…
chr21	45376190	45376382	ENSG00000228930.1	.	-	HAVANA	exon	.	gene_id "ENSG00000228930.1"; transcript_id "ENST00000429327.1"; gene_type "processed_pseudogene"; gene_status "KNOWN"; gene_name "MTCO1P3"; transcript_type "processed_pseudogene"; transcript_status "KNOWN"; transcript_name "MTCO1P3-001"; exon_number 1; exon_id "ENSE00001685072.1"; level 2; transcript_support_level "NA"; ont "PGO:0000004"; tag "basic"; havana_gene "OTTHUMG00000090406.1"; havana_tr…
chr22	36172421	36172779	ENSG00000233764.1	.	+	HAVANA	exon	.	gene_id "ENSG00000233764.1"; transcript_id "ENST00000425366.1"; gene_type "processed_pseudogene"; gene_status "KNOWN"; gene_name "MTCO1P20"; transcript_type "processed_pseudogene"; transcript_status "KNOWN"; transcript_name "MTCO1P20-001"; exon_number 1; exon_id "ENSE00001664993.1"; level 2; transcript_support_level "NA"; ont "PGO:0000004"; tag "basic"; havana_gene "OTTHUMG00000150633.1"; havana_…
chrX	55178206	55178737	ENSG00000229760.1	.	-	HAVANA	exon	.	gene_id "ENSG00000229760.1"; transcript_id "ENST00000433928.1"; gene_type "processed_pseudogene"; gene_status "KNOWN"; gene_name "MTCO1P52"; transcript_type "processed_pseudogene"; transcript_status "KNOWN"; transcript_name "MTCO1P52-001"; exon_number 1; exon_id "ENSE00001773879.1"; level 2; transcript_support_level "NA"; ont "PGO:0000004"; tag "basic"; havana_gene "OTTHUMG00000021647.1"; havana_…
chrX	102796250	102796490	ENSG00000237300.2	.	+	HAVANA	exon	.	gene_id "ENSG00000237300.2"; transcript_id "ENST00000443487.2"; gene_type "processed_pseudogene"; gene_status "KNOWN"; gene_name "MTCO1P19"; transcript_type "processed_pseudogene"; transcript_status "KNOWN"; transcript_name "MTCO1P19-001"; exon_number 1; exon_id "ENSE00001788143.1"; level 2; transcript_support_level "NA"; ont "PGO:0000004"; tag "basic"; havana_gene "OTTHUMG00000022069.2"; havana_…
chrX	102796833	102797093	ENSG00000237300.2	.	+	HAVANA	exon	.	gene_id "ENSG00000237300.2"; transcript_id "ENST00000443487.2"; gene_type "processed_pseudogene"; gene_status "KNOWN"; gene_name "MTCO1P19"; transcript_type "processed_pseudogene"; transcript_status "KNOWN"; transcript_name "MTCO1P19-001"; exon_number 2; exon_id "ENSE00001641075.2"; level 2; transcript_support_level "NA"; ont "PGO:0000004"; tag "basic"; havana_gene "OTTHUMG00000022069.2"; havana_…
chrX	126471704	126472403	ENSG00000230916.2	.	+	HAVANA	exon	.	gene_id "ENSG00000230916.2"; transcript_id "ENST00000441633.2"; gene_type "processed_pseudogene"; gene_status "KNOWN"; gene_name "MTCO1P53"; transcript_type "processed_pseudogene"; transcript_status "KNOWN"; transcript_name "MTCO1P53-001"; exon_number 1; exon_id "ENSE00001612018.2"; level 2; transcript_support_level "NA"; ont "PGO:0000004"; tag "basic"; havana_gene "OTTHUMG00000022350.3"; havana_…
chr1	632756	633438	ENSG00000229344.1	.	+	HAVANA	exon	.	gene_id "ENSG00000229344.1"; transcript_id "ENST00000427426.1"; gene_type "unprocessed_pseudogene"; gene_status "KNOWN"; gene_name "MTCO2P12"; transcript_type "unprocessed_pseudogene"; transcript_status "KNOWN"; transcript_name "MTCO2P12-001"; exon_number 1; exon_id "ENSE00001607075.1"; level 2; transcript_support_level "NA"; ont "PGO:0000005"; tag "basic"; havana_gene "OTTHUMG00000002334.1"; hav…
chr1	93927391	93927569	ENSG00000236689.1	.	-	HAVANA	exon	.	gene_id "ENSG00000236689.1"; transcript_id "ENST00000419780.1"; gene_type "unprocessed_pseudogene"; gene_status "KNOWN"; gene_name "MTCO2P21"; transcript_type "unprocessed_pseudogene"; transcript_status "KNOWN"; transcript_name "MTCO2P21-001"; exon_number 1; exon_id "ENSE00001608720.1"; level 2; transcript_support_level "NA"; ont "PGO:0000005"; tag "basic"; havana_gene "OTTHUMG00000010565.2"; hav…
chr1	93926614	93927113	ENSG00000236689.1	.	-	HAVANA	exon	.	gene_id "ENSG00000236689.1"; transcript_id "ENST00000419780.1"; gene_type "unprocessed_pseudogene"; gene_status "KNOWN"; gene_name "MTCO2P21"; transcript_type "unprocessed_pseudogene"; transcript_status "KNOWN"; transcript_name "MTCO2P21-001"; exon_number 2; exon_id "ENSE00001754314.1"; level 2; transcript_support_level "NA"; ont "PGO:0000005"; tag "basic"; havana_gene "OTTHUMG00000010565.2"; hav…
chr2	130275591	130276257	ENSG00000230496.1	.	+	HAVANA	exon	.	gene_id "ENSG00000230496.1"; transcript_id "ENST00000446518.1"; gene_type "unprocessed_pseudogene"; gene_status "KNOWN"; gene_name "MTCO2P7"; transcript_type "unprocessed_pseudogene"; transcript_status "KNOWN"; transcript_name "MTCO2P7-001"; exon_number 1; exon_id "ENSE00001787401.1"; level 2; transcript_support_level "NA"; ont "PGO:0000005"; tag "basic"; havana_gene "OTTHUMG00000153775.1"; havan…
chr2	131381839	131382497	ENSG00000234480.1	.	-	HAVANA	exon	.	gene_id "ENSG00000234480.1"; transcript_id "ENST00000457151.1"; gene_type "unprocessed_pseudogene"; gene_status "KNOWN"; gene_name "MTCO2P18"; transcript_type "unprocessed_pseudogene"; transcript_status "KNOWN"; transcript_name "MTCO2P18-001"; exon_number 1; exon_id "ENSE00001691883.1"; level 2; transcript_support_level "NA"; ont "PGO:0000005"; tag "basic"; havana_gene "OTTHUMG00000153564.2"; hav…
chr2	143100929	143101355	ENSG00000231766.1	.	-	HAVANA	exon	.	gene_id "ENSG00000231766.1"; transcript_id "ENST00000422621.1"; gene_type "processed_pseudogene"; gene_status "KNOWN"; gene_name "MTCO2P5"; transcript_type "processed_pseudogene"; transcript_status "KNOWN"; transcript_name "MTCO2P5-001"; exon_number 1; exon_id "ENSE00001693575.1"; level 2; transcript_support_level "NA"; ont "PGO:0000004"; tag "basic"; havana_gene "OTTHUMG00000153841.1"; havana_tr…
chr2	201549630	201550307	ENSG00000234842.1	.	+	HAVANA	exon	.	gene_id "ENSG00000234842.1"; transcript_id "ENST00000436962.1"; gene_type "unprocessed_pseudogene"; gene_status "KNOWN"; gene_name "MTCO2P16"; transcript_type "unprocessed_pseudogene"; transcript_status "KNOWN"; transcript_name "MTCO2P16-001"; exon_number 1; exon_id "ENSE00001726535.1"; level 2; transcript_support_level "NA"; ont "PGO:0000005"; tag "basic"; havana_gene "OTTHUMG00000154761.1"; hav…
chr2	202614852	202615529	ENSG00000233888.2	.	+	HAVANA	exon	.	gene_id "ENSG00000233888.2"; transcript_id "ENST00000424336.2"; gene_type "unprocessed_pseudogene"; gene_status "KNOWN"; gene_name "MTCO2P17"; transcript_type "unprocessed_pseudogene"; transcript_status "KNOWN"; transcript_name "MTCO2P17-001"; exon_number 1; exon_id "ENSE00001763105.2"; level 2; transcript_support_level "NA"; ont "PGO:0000005"; tag "basic"; havana_gene "OTTHUMG00000154676.3"; hav…
chr3	89587885	89588570	ENSG00000240951.1	.	-	HAVANA	exon	.	gene_id "ENSG00000240951.1"; transcript_id "ENST00000463134.1"; gene_type "processed_pseudogene"; gene_status "KNOWN"; gene_name "MTCO2P6"; transcript_type "processed_pseudogene"; transcript_status "KNOWN"; transcript_name "MTCO2P6-001"; exon_number 1; exon_id "ENSE00001943197.1"; level 2; transcript_support_level "NA"; ont "PGO:0000004"; tag "basic"; havana_gene "OTTHUMG00000159039.1"; havana_tr…
chr3	120722457	120722646	ENSG00000243257.1	.	+	HAVANA	exon	.	gene_id "ENSG00000243257.1"; transcript_id "ENST00000465212.1"; gene_type "unprocessed_pseudogene"; gene_status "KNOWN"; gene_name "MTCO2P29"; transcript_type "unprocessed_pseudogene"; transcript_status "KNOWN"; transcript_name "MTCO2P29-001"; exon_number 1; exon_id "ENSE00001914161.1"; level 2; transcript_support_level "NA"; ont "PGO:0000005"; tag "basic"; havana_gene "OTTHUMG00000159665.1"; hav…
chr4	155458869	155459563	ENSG00000249386.1	.	-	HAVANA	exon	.	gene_id "ENSG00000249386.1"; transcript_id "ENST00000503214.1"; gene_type "unprocessed_pseudogene"; gene_status "KNOWN"; gene_name "MTCO2P9"; transcript_type "unprocessed_pseudogene"; transcript_status "KNOWN"; transcript_name "MTCO2P9-001"; exon_number 1; exon_id "ENSE00002065579.1"; level 2; transcript_support_level "NA"; ont "PGO:0000005"; tag "basic"; havana_gene "OTTHUMG00000161814.1"; havan…
chr5	1370542	1370945	ENSG00000248951.2	.	-	HAVANA	exon	.	gene_id "ENSG00000248951.2"; transcript_id "ENST00000514865.2"; gene_type "processed_pseudogene"; gene_status "KNOWN"; gene_name "MTCO2P32"; transcript_type "processed_pseudogene"; transcript_status "KNOWN"; transcript_name "MTCO2P32-001"; exon_number 1; exon_id "ENSE00002037983.2"; level 2; transcript_support_level "NA"; ont "PGO:0000004"; tag "basic"; havana_gene "OTTHUMG00000161735.2"; havana_…
chr5	5395971	5396335	ENSG00000250808.1	.	-	HAVANA	exon	.	gene_id "ENSG00000250808.1"; transcript_id "ENST00000503662.1"; gene_type "processed_pseudogene"; gene_status "KNOWN"; gene_name "MTCO2P30"; transcript_type "processed_pseudogene"; transcript_status "KNOWN"; transcript_name "MTCO2P30-001"; exon_number 1; exon_id "ENSE00002066514.1"; level 2; transcript_support_level "NA"; ont "PGO:0000004"; tag "basic"; havana_gene "OTTHUMG00000161667.1"; havana_…
chr5	98409674	98410100	ENSG00000249990.1	.	-	HAVANA	exon	.	gene_id "ENSG00000249990.1"; transcript_id "ENST00000515611.1"; gene_type "processed_pseudogene"; gene_status "KNOWN"; gene_name "MTCO2P24"; transcript_type "processed_pseudogene"; transcript_status "KNOWN"; transcript_name "MTCO2P24-001"; exon_number 1; exon_id "ENSE00002038611.1"; level 2; transcript_support_level "NA"; ont "PGO:0000004"; tag "basic"; havana_gene "OTTHUMG00000162716.1"; havana_…
chr5	100052858	100053539	ENSG00000270225.1	.	-	HAVANA	exon	.	gene_id "ENSG00000270225.1"; transcript_id "ENST00000603246.1"; gene_type "processed_pseudogene"; gene_status "KNOWN"; gene_name "MTCO2P22"; transcript_type "processed_pseudogene"; transcript_status "KNOWN"; transcript_name "MTCO2P22-001"; exon_number 1; exon_id "ENSE00003642214.1"; level 2; transcript_support_level "NA"; ont "PGO:0000004"; tag "basic"; havana_gene "OTTHUMG00000185134.1"; havana_…
chr6	24947879	24948344	ENSG00000217083.1	.	+	HAVANA	exon	.	gene_id "ENSG00000217083.1"; transcript_id "ENST00000402100.1"; gene_type "processed_pseudogene"; gene_status "KNOWN"; gene_name "MTCO2P33"; transcript_type "processed_pseudogene"; transcript_status "KNOWN"; transcript_name "MTCO2P33-001"; exon_number 1; exon_id "ENSE00001560481.1"; level 2; transcript_support_level "NA"; ont "PGO:0000004"; tag "basic"; havana_gene "OTTHUMG00000014376.1"; havana_…
chr6	153665706	153666390	ENSG00000217160.2	.	+	HAVANA	exon	.	gene_id "ENSG00000217160.2"; transcript_id "ENST00000402702.2"; gene_type "processed_pseudogene"; gene_status "KNOWN"; gene_name "MTCO2P31"; transcript_type "processed_pseudogene"; transcript_status "KNOWN"; transcript_name "MTCO2P31-001"; exon_number 1; exon_id "ENSE00001555003.2"; level 2; transcript_support_level "NA"; ont "PGO:0000004"; tag "basic"; havana_gene "OTTHUMG00000015861.2"; havana_…
chr7	64107828	64108486	ENSG00000234234.1	.	-	HAVANA	exon	.	gene_id "ENSG00000234234.1"; transcript_id "ENST00000412213.1"; gene_type "unprocessed_pseudogene"; gene_status "KNOWN"; gene_name "MTCO2P8"; transcript_type "unprocessed_pseudogene"; transcript_status "KNOWN"; transcript_name "MTCO2P8-001"; exon_number 1; exon_id "ENSE00001700510.1"; level 2; transcript_support_level "NA"; ont "PGO:0000005"; tag "basic"; havana_gene "OTTHUMG00000156476.1"; havan…
chr7	69330697	69331378	ENSG00000230654.1	.	-	HAVANA	exon	.	gene_id "ENSG00000230654.1"; transcript_id "ENST00000447065.1"; gene_type "unprocessed_pseudogene"; gene_status "KNOWN"; gene_name "MTCO2P25"; transcript_type "unprocessed_pseudogene"; transcript_status "KNOWN"; transcript_name "MTCO2P25-001"; exon_number 1; exon_id "ENSE00001622335.1"; level 2; transcript_support_level "NA"; ont "PGO:0000005"; tag "basic"; havana_gene "OTTHUMG00000156610.1"; hav…
chr8	103091262	103091509	ENSG00000253977.1	.	+	HAVANA	exon	.	gene_id "ENSG00000253977.1"; transcript_id "ENST00000517968.1"; gene_type "processed_pseudogene"; gene_status "KNOWN"; gene_name "MTCO2P4"; transcript_type "processed_pseudogene"; transcript_status "KNOWN"; transcript_name "MTCO2P4-001"; exon_number 1; exon_id "ENSE00002138139.1"; level 2; transcript_support_level "NA"; ont "PGO:0000004"; tag "basic"; havana_gene "OTTHUMG00000164844.1"; havana_tr…
chr9	5098340	5098695	ENSG00000235917.1	.	+	HAVANA	exon	.	gene_id "ENSG00000235917.1"; transcript_id "ENST00000431069.1"; gene_type "unprocessed_pseudogene"; gene_status "KNOWN"; gene_name "MTCO2P11"; transcript_type "unprocessed_pseudogene"; transcript_status "KNOWN"; transcript_name "MTCO2P11-001"; exon_number 1; exon_id "ENSE00001610135.1"; level 2; transcript_support_level "NA"; ont "PGO:0000005"; tag "basic"; havana_gene "OTTHUMG00000019480.1"; hav…
chr9	5099000	5099325	ENSG00000235917.1	.	+	HAVANA	exon	.	gene_id "ENSG00000235917.1"; transcript_id "ENST00000431069.1"; gene_type "unprocessed_pseudogene"; gene_status "KNOWN"; gene_name "MTCO2P11"; transcript_type "unprocessed_pseudogene"; transcript_status "KNOWN"; transcript_name "MTCO2P11-001"; exon_number 2; exon_id "ENSE00001755311.1"; level 2; transcript_support_level "NA"; ont "PGO:0000005"; tag "basic"; havana_gene "OTTHUMG00000019480.1"; hav…
chr10	69590582	69591262	ENSG00000235803.1	.	-	HAVANA	exon	.	gene_id "ENSG00000235803.1"; transcript_id "ENST00000425216.1"; gene_type "processed_pseudogene"; gene_status "KNOWN"; gene_name "MTCO2P23"; transcript_type "processed_pseudogene"; transcript_status "KNOWN"; transcript_name "MTCO2P23-001"; exon_number 1; exon_id "ENSE00001722946.1"; level 2; transcript_support_level "NA"; ont "PGO:0000004"; tag "basic"; havana_gene "OTTHUMG00000018389.1"; havana_…
chr11	103403511	103404167	ENSG00000255417.1	.	-	HAVANA	exon	.	gene_id "ENSG00000255417.1"; transcript_id "ENST00000532655.1"; gene_type "processed_pseudogene"; gene_status "KNOWN"; gene_name "MTCO2P15"; transcript_type "processed_pseudogene"; transcript_status "KNOWN"; transcript_name "MTCO2P15-001"; exon_number 1; exon_id "ENSE00002197585.1"; level 2; transcript_support_level "NA"; ont "PGO:0000004"; tag "basic"; havana_gene "OTTHUMG00000165945.1"; havana_…
chr13	57204378	57204799	ENSG00000230009.1	.	+	HAVANA	exon	.	gene_id "ENSG00000230009.1"; transcript_id "ENST00000442543.1"; gene_type "processed_pseudogene"; gene_status "KNOWN"; gene_name "MTCO2P3"; transcript_type "processed_pseudogene"; transcript_status "KNOWN"; transcript_name "MTCO2P3-001"; exon_number 1; exon_id "ENSE00001702444.1"; level 2; transcript_support_level "NA"; ont "PGO:0000004"; tag "basic"; havana_gene "OTTHUMG00000016988.1"; havana_tr…
chr18	47853232	47853457	ENSG00000267541.1	.	-	HAVANA	exon	.	gene_id "ENSG00000267541.1"; transcript_id "ENST00000591258.1"; gene_type "processed_pseudogene"; gene_status "KNOWN"; gene_name "MTCO2P2"; transcript_type "processed_pseudogene"; transcript_status "KNOWN"; transcript_name "MTCO2P2-001"; exon_number 1; exon_id "ENSE00002960851.1"; level 2; transcript_support_level "NA"; ont "PGO:0000004"; tag "basic"; havana_gene "OTTHUMG00000180285.1"; havana_tr…
chr19	12504904	12505019	ENSG00000230321.1	.	+	HAVANA	exon	.	gene_id "ENSG00000230321.1"; transcript_id "ENST00000420740.1"; gene_type "unprocessed_pseudogene"; gene_status "KNOWN"; gene_name "MTCO2P27"; transcript_type "unprocessed_pseudogene"; transcript_status "KNOWN"; transcript_name "MTCO2P27-001"; exon_number 1; exon_id "ENSE00001720782.1"; level 2; transcript_support_level "NA"; ont "PGO:0000005"; tag "basic"; havana_gene "OTTHUMG00000156415.1"; hav…
chr19	12505663	12505976	ENSG00000230321.1	.	+	HAVANA	exon	.	gene_id "ENSG00000230321.1"; transcript_id "ENST00000420740.1"; gene_type "unprocessed_pseudogene"; gene_status "KNOWN"; gene_name "MTCO2P27"; transcript_type "unprocessed_pseudogene"; transcript_status "KNOWN"; transcript_name "MTCO2P27-001"; exon_number 2; exon_id "ENSE00001776154.1"; level 2; transcript_support_level "NA"; ont "PGO:0000005"; tag "basic"; havana_gene "OTTHUMG00000156415.1"; hav…
chr20	60414395	60414872	ENSG00000229690.1	.	-	HAVANA	exon	.	gene_id "ENSG00000229690.1"; transcript_id "ENST00000424648.1"; gene_type "processed_pseudogene"; gene_status "KNOWN"; gene_name "MTCO2P1"; transcript_type "processed_pseudogene"; transcript_status "KNOWN"; transcript_name "MTCO2P1-001"; exon_number 1; exon_id "ENSE00001655858.1"; level 2; transcript_support_level "NA"; ont "PGO:0000004"; tag "basic"; havana_gene "OTTHUMG00000032881.1"; havana_tr…
chr22	36172933	36173029	ENSG00000231576.1	.	+	HAVANA	exon	.	gene_id "ENSG00000231576.1"; transcript_id "ENST00000437339.1"; gene_type "processed_pseudogene"; gene_status "KNOWN"; gene_name "MTCO2P20"; transcript_type "processed_pseudogene"; transcript_status "KNOWN"; transcript_name "MTCO2P20-001"; exon_number 1; exon_id "ENSE00001780635.1"; level 2; transcript_support_level "NA"; ont "PGO:0000004"; tag "basic"; havana_gene "OTTHUMG00000150631.1"; havana_…
chr22	36173371	36173948	ENSG00000231576.1	.	+	HAVANA	exon	.	gene_id "ENSG00000231576.1"; transcript_id "ENST00000437339.1"; gene_type "processed_pseudogene"; gene_status "KNOWN"; gene_name "MTCO2P20"; transcript_type "processed_pseudogene"; transcript_status "KNOWN"; transcript_name "MTCO2P20-001"; exon_number 2; exon_id "ENSE00001672446.1"; level 2; transcript_support_level "NA"; ont "PGO:0000004"; tag "basic"; havana_gene "OTTHUMG00000150631.1"; havana_…
chrX	102797530	102798128	ENSG00000237628.2	.	+	HAVANA	exon	.	gene_id "ENSG00000237628.2"; transcript_id "ENST00000427513.2"; gene_type "processed_pseudogene"; gene_status "KNOWN"; gene_name "MTCO2P19"; transcript_type "processed_pseudogene"; transcript_status "KNOWN"; transcript_name "MTCO2P19-001"; exon_number 1; exon_id "ENSE00001640142.2"; level 2; transcript_support_level "NA"; ont "PGO:0000004"; tag "basic"; havana_gene "OTTHUMG00000022070.2"; havana_…
chr1	634375	634922	ENSG00000198744.5	.	+	HAVANA	exon	.	gene_id "ENSG00000198744.5"; transcript_id "ENST00000416718.2"; gene_type "unprocessed_pseudogene"; gene_status "KNOWN"; gene_name "MTCO3P12"; transcript_type "unprocessed_pseudogene"; transcript_status "KNOWN"; transcript_name "MTCO3P12-001"; exon_number 1; exon_id "ENSE00001720008.2"; level 2; transcript_support_level "NA"; ont "PGO:0000005"; tag "basic"; havana_gene "OTTHUMG00000002337.2"; hav…
chr1	93924742	93925385	ENSG00000232752.1	.	-	HAVANA	exon	.	gene_id "ENSG00000232752.1"; transcript_id "ENST00000430791.1"; gene_type "unprocessed_pseudogene"; gene_status "KNOWN"; gene_name "MTCO3P21"; transcript_type "unprocessed_pseudogene"; transcript_status "KNOWN"; transcript_name "MTCO3P21-001"; exon_number 1; exon_id "ENSE00001765890.1"; level 2; transcript_support_level "NA"; ont "PGO:0000005"; tag "basic"; havana_gene "OTTHUMG00000010567.2"; hav…
chr1	235542158	235542390	ENSG00000235761.2	.	-	HAVANA	exon	.	gene_id "ENSG00000235761.2"; transcript_id "ENST00000425787.2"; gene_type "processed_pseudogene"; gene_status "KNOWN"; gene_name "MTCO3P46"; transcript_type "processed_pseudogene"; transcript_status "KNOWN"; transcript_name "MTCO3P46-001"; exon_number 1; exon_id "ENSE00001805682.2"; level 2; transcript_support_level "NA"; ont "PGO:0000004"; tag "basic"; havana_gene "OTTHUMG00000040741.2"; havana_…
chr2	94900989	94901602	ENSG00000232128.1	.	+	HAVANA	exon	.	gene_id "ENSG00000232128.1"; transcript_id "ENST00000443036.1"; gene_type "processed_pseudogene"; gene_status "KNOWN"; gene_name "MTCO3P45"; transcript_type "processed_pseudogene"; transcript_status "KNOWN"; transcript_name "MTCO3P45-001"; exon_number 1; exon_id "ENSE00001735293.1"; level 2; transcript_support_level "NA"; ont "PGO:0000004"; tag "basic"; havana_gene "OTTHUMG00000155133.1"; havana_…
chr2	120211726	120212290	ENSG00000227788.1	.	+	HAVANA	exon	.	gene_id "ENSG00000227788.1"; transcript_id "ENST00000440974.1"; gene_type "processed_pseudogene"; gene_status "KNOWN"; gene_name "MTCO3P43"; transcript_type "processed_pseudogene"; transcript_status "KNOWN"; transcript_name "MTCO3P43-001"; exon_number 1; exon_id "ENSE00001658076.1"; level 2; transcript_support_level "NA"; ont "PGO:0000004"; tag "basic"; havana_gene "OTTHUMG00000154457.1"; havana_…
chr2	120212655	120212862	ENSG00000227788.1	.	+	HAVANA	exon	.	gene_id "ENSG00000227788.1"; transcript_id "ENST00000440974.1"; gene_type "processed_pseudogene"; gene_status "KNOWN"; gene_name "MTCO3P43"; transcript_type "processed_pseudogene"; transcript_status "KNOWN"; transcript_name "MTCO3P43-001"; exon_number 2; exon_id "ENSE00001612858.1"; level 2; transcript_support_level "NA"; ont "PGO:0000004"; tag "basic"; havana_gene "OTTHUMG00000154457.1"; havana_…
chr2	130277183	130277957	ENSG00000249997.1	.	+	HAVANA	exon	.	gene_id "ENSG00000249997.1"; transcript_id "ENST00000510008.1"; gene_type "unprocessed_pseudogene"; gene_status "KNOWN"; gene_name "MTCO3P7"; transcript_type "unprocessed_pseudogene"; transcript_status "KNOWN"; transcript_name "MTCO3P7-001"; exon_number 1; exon_id "ENSE00002032524.1"; level 2; transcript_support_level "NA"; ont "PGO:0000005"; tag "basic"; havana_gene "OTTHUMG00000153777.1"; havan…
chr2	131380152	131380913	ENSG00000227661.1	.	-	HAVANA	exon	.	gene_id "ENSG00000227661.1"; transcript_id "ENST00000440206.1"; gene_type "unprocessed_pseudogene"; gene_status "KNOWN"; gene_name "MTCO3P18"; transcript_type "unprocessed_pseudogene"; transcript_status "KNOWN"; transcript_name "MTCO3P18-001"; exon_number 1; exon_id "ENSE00001771529.1"; level 2; transcript_support_level "NA"; ont "PGO:0000005"; tag "basic"; havana_gene "OTTHUMG00000153571.1"; hav…
chr2	143099366	143099933	ENSG00000225476.1	.	-	HAVANA	exon	.	gene_id "ENSG00000225476.1"; transcript_id "ENST00000433620.1"; gene_type "processed_pseudogene"; gene_status "KNOWN"; gene_name "MTCO3P5"; transcript_type "processed_pseudogene"; transcript_status "KNOWN"; transcript_name "MTCO3P5-001"; exon_number 1; exon_id "ENSE00001621953.1"; level 2; transcript_support_level "NA"; ont "PGO:0000004"; tag "basic"; havana_gene "OTTHUMG00000153838.2"; havana_tr…
chr2	143098897	143099044	ENSG00000225476.1	.	-	HAVANA	exon	.	gene_id "ENSG00000225476.1"; transcript_id "ENST00000433620.1"; gene_type "processed_pseudogene"; gene_status "KNOWN"; gene_name "MTCO3P5"; transcript_type "processed_pseudogene"; transcript_status "KNOWN"; transcript_name "MTCO3P5-001"; exon_number 2; exon_id "ENSE00001652044.1"; level 2; transcript_support_level "NA"; ont "PGO:0000004"; tag "basic"; havana_gene "OTTHUMG00000153838.2"; havana_tr…
chr2	201552858	201553612	ENSG00000227736.1	.	+	HAVANA	exon	.	gene_id "ENSG00000227736.1"; transcript_id "ENST00000454456.1"; gene_type "unprocessed_pseudogene"; gene_status "KNOWN"; gene_name "MTCO3P16"; transcript_type "unprocessed_pseudogene"; transcript_status "KNOWN"; transcript_name "MTCO3P16-001"; exon_number 1; exon_id "ENSE00001752184.1"; level 2; transcript_support_level "NA"; ont "PGO:0000005"; tag "basic"; havana_gene "OTTHUMG00000154756.1"; hav…
chr2	202616699	202617212	ENSG00000237542.1	.	+	HAVANA	exon	.	gene_id "ENSG00000237542.1"; transcript_id "ENST00000443775.1"; gene_type "unprocessed_pseudogene"; gene_status "KNOWN"; gene_name "MTCO3P17"; transcript_type "unprocessed_pseudogene"; transcript_status "KNOWN"; transcript_name "MTCO3P17-001"; exon_number 1; exon_id "ENSE00001792429.1"; level 2; transcript_support_level "NA"; ont "PGO:0000005"; tag "basic"; havana_gene "OTTHUMG00000154678.1"; hav…
chr3	106896890	106897671	ENSG00000242836.1	.	-	HAVANA	exon	.	gene_id "ENSG00000242836.1"; transcript_id "ENST00000485582.1"; gene_type "unprocessed_pseudogene"; gene_status "KNOWN"; gene_name "MTCO3P35"; transcript_type "unprocessed_pseudogene"; transcript_status "KNOWN"; transcript_name "MTCO3P35-001"; exon_number 1; exon_id "ENSE00001892888.1"; level 2; transcript_support_level "NA"; ont "PGO:0000005"; tag "basic"; havana_gene "OTTHUMG00000159147.2"; hav…
chr3	166161202	166161968	ENSG00000242456.1	.	-	HAVANA	exon	.	gene_id "ENSG00000242456.1"; transcript_id "ENST00000468910.1"; gene_type "processed_pseudogene"; gene_status "KNOWN"; gene_name "MTCO3P38"; transcript_type "processed_pseudogene"; transcript_status "KNOWN"; transcript_name "MTCO3P38-002"; exon_number 1; exon_id "ENSE00001853233.1"; level 2; transcript_support_level "NA"; ont "PGO:0000004"; tag "basic"; havana_gene "OTTHUMG00000158211.2"; havana_…
chr4	25720515	25721056	ENSG00000248654.1	.	-	HAVANA	exon	.	gene_id "ENSG00000248654.1"; transcript_id "ENST00000510977.1"; gene_type "unprocessed_pseudogene"; gene_status "KNOWN"; gene_name "MTCO3P44"; transcript_type "unprocessed_pseudogene"; transcript_status "KNOWN"; transcript_name "MTCO3P44-001"; exon_number 1; exon_id "ENSE00002062934.1"; level 2; transcript_support_level "NA"; ont "PGO:0000005"; tag "basic"; havana_gene "OTTHUMG00000160338.1"; hav…
chr4	49246020	49246538	ENSG00000268736.1	.	+	HAVANA	exon	.	gene_id "ENSG00000268736.1"; transcript_id "ENST00000514812.2"; gene_type "processed_pseudogene"; gene_status "KNOWN"; gene_name "MTCO3P39"; transcript_type "processed_pseudogene"; transcript_status "KNOWN"; transcript_name "MTCO3P39-001"; exon_number 1; exon_id "ENSE00003189928.1"; level 2; transcript_support_level "NA"; ont "PGO:0000004"; tag "basic"; havana_gene "OTTHUMG00000163199.2"; havana_…
chr4	49548917	49549435	ENSG00000268391.1	.	-	HAVANA	exon	.	gene_id "ENSG00000268391.1"; transcript_id "ENST00000509488.2"; gene_type "processed_pseudogene"; gene_status "KNOWN"; gene_name "MTCO3P42"; transcript_type "processed_pseudogene"; transcript_status "KNOWN"; transcript_name "MTCO3P42-001"; exon_number 1; exon_id "ENSE00003149360.1"; level 2; transcript_support_level "NA"; ont "PGO:0000004"; tag "basic"; havana_gene "OTTHUMG00000160595.2"; havana_…
chr4	64606417	64606613	ENSG00000251430.1	.	+	HAVANA	exon	.	gene_id "ENSG00000251430.1"; transcript_id "ENST00000514397.1"; gene_type "unprocessed_pseudogene"; gene_status "KNOWN"; gene_name "MTCO3P27"; transcript_type "unprocessed_pseudogene"; transcript_status "KNOWN"; transcript_name "MTCO3P27-001"; exon_number 1; exon_id "ENSE00002050332.1"; level 2; transcript_support_level "NA"; ont "PGO:0000005"; tag "basic"; havana_gene "OTTHUMG00000162345.2"; hav…
chr4	64611373	64611888	ENSG00000248328.1	.	-	HAVANA	exon	.	gene_id "ENSG00000248328.1"; transcript_id "ENST00000513351.1"; gene_type "unprocessed_pseudogene"; gene_status "KNOWN"; gene_name "MTCO3P28"; transcript_type "unprocessed_pseudogene"; transcript_status "KNOWN"; transcript_name "MTCO3P28-001"; exon_number 1; exon_id "ENSE00002021671.1"; level 2; transcript_support_level "NA"; ont "PGO:0000005"; tag "basic"; havana_gene "OTTHUMG00000162344.1"; hav…
chr4	155457179	155457960	ENSG00000249698.1	.	-	HAVANA	exon	.	gene_id "ENSG00000249698.1"; transcript_id "ENST00000506989.1"; gene_type "unprocessed_pseudogene"; gene_status "KNOWN"; gene_name "MTCO3P9"; transcript_type "unprocessed_pseudogene"; transcript_status "KNOWN"; transcript_name "MTCO3P9-001"; exon_number 1; exon_id "ENSE00002031855.1"; level 2; transcript_support_level "NA"; ont "PGO:0000005"; tag "basic"; havana_gene "OTTHUMG00000161819.1"; havan…
chr5	100051132	100051916	ENSG00000270388.1	.	-	HAVANA	exon	.	gene_id "ENSG00000270388.1"; transcript_id "ENST00000603219.1"; gene_type "processed_pseudogene"; gene_status "KNOWN"; gene_name "MTCO3P22"; transcript_type "processed_pseudogene"; transcript_status "KNOWN"; transcript_name "MTCO3P22-001"; exon_number 1; exon_id "ENSE00003565973.1"; level 2; transcript_support_level "NA"; ont "PGO:0000004"; tag "basic"; havana_gene "OTTHUMG00000185132.1"; havana_…
chr6	32706123	32706955	ENSG00000235040.1	.	-	HAVANA	exon	.	gene_id "ENSG00000235040.1"; transcript_id "ENST00000422088.1"; gene_type "unprocessed_pseudogene"; gene_status "KNOWN"; gene_name "MTCO3P1"; transcript_type "unprocessed_pseudogene"; transcript_status "KNOWN"; transcript_name "MTCO3P1-001"; exon_number 1; exon_id "ENSE00001680114.1"; level 2; transcript_support_level "NA"; ont "PGO:0000005"; tag "basic"; havana_gene "OTTHUMG00000031271.3"; havan…
chr6	153667317	153668106	ENSG00000217044.1	.	+	HAVANA	exon	.	gene_id "ENSG00000217044.1"; transcript_id "ENST00000405526.1"; gene_type "processed_pseudogene"; gene_status "KNOWN"; gene_name "MTCO3P31"; transcript_type "processed_pseudogene"; transcript_status "KNOWN"; transcript_name "MTCO3P31-001"; exon_number 1; exon_id "ENSE00001550279.1"; level 2; transcript_support_level "NA"; ont "PGO:0000004"; tag "basic"; havana_gene "OTTHUMG00000015864.1"; havana_…
chr7	57167879	57168651	ENSG00000231537.1	.	+	HAVANA	exon	.	gene_id "ENSG00000231537.1"; transcript_id "ENST00000455912.1"; gene_type "unprocessed_pseudogene"; gene_status "KNOWN"; gene_name "MTCO3P10"; transcript_type "unprocessed_pseudogene"; transcript_status "KNOWN"; transcript_name "MTCO3P10-001"; exon_number 1; exon_id "ENSE00001700580.1"; level 2; transcript_support_level "NA"; ont "PGO:0000005"; tag "basic"; havana_gene "OTTHUMG00000156676.1"; hav…
chr7	57191140	57191927	ENSG00000228851.1	.	+	HAVANA	exon	.	gene_id "ENSG00000228851.1"; transcript_id "ENST00000419236.1"; gene_type "unprocessed_pseudogene"; gene_status "KNOWN"; gene_name "MTCO3P4"; transcript_type "unprocessed_pseudogene"; transcript_status "KNOWN"; transcript_name "MTCO3P4-001"; exon_number 1; exon_id "ENSE00001606242.1"; level 2; transcript_support_level "NA"; ont "PGO:0000005"; tag "basic"; havana_gene "OTTHUMG00000156678.1"; havan…
chr7	64106064	64106819	ENSG00000233385.1	.	-	HAVANA	exon	.	gene_id "ENSG00000233385.1"; transcript_id "ENST00000453691.1"; gene_type "unprocessed_pseudogene"; gene_status "KNOWN"; gene_name "MTCO3P8"; transcript_type "unprocessed_pseudogene"; transcript_status "KNOWN"; transcript_name "MTCO3P8-001"; exon_number 1; exon_id "ENSE00001800484.1"; level 2; transcript_support_level "NA"; ont "PGO:0000005"; tag "basic"; havana_gene "OTTHUMG00000156470.1"; havan…
chr7	67628021	67628349	ENSG00000237466.1	.	+	HAVANA	exon	.	gene_id "ENSG00000237466.1"; transcript_id "ENST00000414801.1"; gene_type "unprocessed_pseudogene"; gene_status "KNOWN"; gene_name "MTCO3P41"; transcript_type "unprocessed_pseudogene"; transcript_status "KNOWN"; transcript_name "MTCO3P41-001"; exon_number 1; exon_id "ENSE00001680045.1"; level 2; transcript_support_level "NA"; ont "PGO:0000005"; tag "basic"; havana_gene "OTTHUMG00000156573.1"; hav…
chr9	5100235	5101009	ENSG00000237711.1	.	+	HAVANA	exon	.	gene_id "ENSG00000237711.1"; transcript_id "ENST00000455103.1"; gene_type "unprocessed_pseudogene"; gene_status "KNOWN"; gene_name "MTCO3P11"; transcript_type "unprocessed_pseudogene"; transcript_status "KNOWN"; transcript_name "MTCO3P11-001"; exon_number 1; exon_id "ENSE00001704073.1"; level 2; transcript_support_level "NA"; ont "PGO:0000005"; tag "basic"; havana_gene "OTTHUMG00000019479.1"; hav…
chr9	31505945	31506615	ENSG00000229080.1	.	+	HAVANA	exon	.	gene_id "ENSG00000229080.1"; transcript_id "ENST00000426425.1"; gene_type "unprocessed_pseudogene"; gene_status "KNOWN"; gene_name "MTCO3P30"; transcript_type "unprocessed_pseudogene"; transcript_status "KNOWN"; transcript_name "MTCO3P30-001"; exon_number 1; exon_id "ENSE00001592416.1"; level 2; transcript_support_level "NA"; ont "PGO:0000005"; tag "basic"; havana_gene "OTTHUMG00000019737.1"; hav…
chr9	82427349	82428025	ENSG00000228046.2	.	-	HAVANA	exon	.	gene_id "ENSG00000228046.2"; transcript_id "ENST00000392516.4"; gene_type "processed_pseudogene"; gene_status "KNOWN"; gene_name "MTCO3P40"; transcript_type "processed_pseudogene"; transcript_status "KNOWN"; transcript_name "MTCO3P40-001"; exon_number 1; exon_id "ENSE00001737007.2"; level 2; transcript_support_level "NA"; ont "PGO:0000004"; tag "basic"; havana_gene "OTTHUMG00000020095.2"; havana_…
chr9	92109012	92109689	ENSG00000228069.1	.	+	HAVANA	exon	.	gene_id "ENSG00000228069.1"; transcript_id "ENST00000432119.1"; gene_type "unprocessed_pseudogene"; gene_status "KNOWN"; gene_name "MTCO3P29"; transcript_type "unprocessed_pseudogene"; transcript_status "KNOWN"; transcript_name "MTCO3P29-001"; exon_number 1; exon_id "ENSE00001769077.1"; level 2; transcript_support_level "NA"; ont "PGO:0000005"; tag "basic"; havana_gene "OTTHUMG00000020215.1"; hav…
chr9	92109993	92110095	ENSG00000228069.1	.	+	HAVANA	exon	.	gene_id "ENSG00000228069.1"; transcript_id "ENST00000432119.1"; gene_type "unprocessed_pseudogene"; gene_status "KNOWN"; gene_name "MTCO3P29"; transcript_type "unprocessed_pseudogene"; transcript_status "KNOWN"; transcript_name "MTCO3P29-001"; exon_number 2; exon_id "ENSE00001704064.1"; level 2; transcript_support_level "NA"; ont "PGO:0000005"; tag "basic"; havana_gene "OTTHUMG00000020215.1"; hav…
chr11	103402012	103402586	ENSG00000254895.2	.	-	HAVANA	exon	.	gene_id "ENSG00000254895.2"; transcript_id "ENST00000526563.2"; gene_type "processed_pseudogene"; gene_status "KNOWN"; gene_name "MTCO3P15"; transcript_type "processed_pseudogene"; transcript_status "KNOWN"; transcript_name "MTCO3P15-001"; exon_number 1; exon_id "ENSE00002143610.2"; level 2; transcript_support_level "NA"; ont "PGO:0000004"; tag "basic"; havana_gene "OTTHUMG00000165942.2"; havana_…
chr13	23765933	23766104	ENSG00000232102.1	.	-	HAVANA	exon	.	gene_id "ENSG00000232102.1"; transcript_id "ENST00000457365.1"; gene_type "processed_pseudogene"; gene_status "KNOWN"; gene_name "MTCO3P2"; transcript_type "processed_pseudogene"; transcript_status "KNOWN"; transcript_name "MTCO3P2-001"; exon_number 1; exon_id "ENSE00001681408.1"; level 2; transcript_support_level "NA"; ont "PGO:0000004"; tag "basic"; havana_gene "OTTHUMG00000016569.1"; havana_tr…
chr15	58150274	58150563	ENSG00000259651.2	.	+	HAVANA	exon	.	gene_id "ENSG00000259651.2"; transcript_id "ENST00000561363.2"; gene_type "processed_pseudogene"; gene_status "KNOWN"; gene_name "MTCO3P23"; transcript_type "processed_pseudogene"; transcript_status "KNOWN"; transcript_name "MTCO3P23-001"; exon_number 1; exon_id "ENSE00002546742.2"; level 2; transcript_support_level "NA"; ont "PGO:0000004"; tag "basic"; havana_gene "OTTHUMG00000171994.2"; havana_…
chr16	10723835	10724617	ENSG00000262158.1	.	-	HAVANA	exon	.	gene_id "ENSG00000262158.1"; transcript_id "ENST00000572729.1"; gene_type "unprocessed_pseudogene"; gene_status "KNOWN"; gene_name "MTCO3P24"; transcript_type "unprocessed_pseudogene"; transcript_status "KNOWN"; transcript_name "MTCO3P24-001"; exon_number 1; exon_id "ENSE00002663355.1"; level 2; transcript_support_level "NA"; ont "PGO:0000005"; tag "basic"; havana_gene "OTTHUMG00000177350.1"; hav…
chr17	22530611	22531392	ENSG00000264316.1	.	+	HAVANA	exon	.	gene_id "ENSG00000264316.1"; transcript_id "ENST00000577757.1"; gene_type "unprocessed_pseudogene"; gene_status "KNOWN"; gene_name "MTCO3P13"; transcript_type "unprocessed_pseudogene"; transcript_status "KNOWN"; transcript_name "MTCO3P13-001"; exon_number 1; exon_id "ENSE00002733650.1"; level 2; transcript_support_level "NA"; ont "PGO:0000005"; tag "basic"; havana_gene "OTTHUMG00000179093.1"; hav…
chr22	36175166	36175854	ENSG00000225557.1	.	+	HAVANA	exon	.	gene_id "ENSG00000225557.1"; transcript_id "ENST00000454926.1"; gene_type "processed_pseudogene"; gene_status "KNOWN"; gene_name "MTCO3P20"; transcript_type "processed_pseudogene"; transcript_status "KNOWN"; transcript_name "MTCO3P20-001"; exon_number 1; exon_id "ENSE00001781192.1"; level 2; transcript_support_level "NA"; ont "PGO:0000004"; tag "basic"; havana_gene "OTTHUMG00000150635.3"; havana_…
chrX	102799562	102799883	ENSG00000224471.2	.	+	HAVANA	exon	.	gene_id "ENSG00000224471.2"; transcript_id "ENST00000415864.2"; gene_type "processed_pseudogene"; gene_status "KNOWN"; gene_name "MTCO3P19"; transcript_type "processed_pseudogene"; transcript_status "KNOWN"; transcript_name "MTCO3P19-001"; exon_number 1; exon_id "ENSE00001594791.2"; level 2; transcript_support_level "NA"; ont "PGO:0000004"; tag "basic"; havana_gene "OTTHUMG00000022072.2"; havana_…
chr1	629061	629433	ENSG00000225972.1	.	+	HAVANA	exon	.	gene_id "ENSG00000225972.1"; transcript_id "ENST00000416931.1"; gene_type "unprocessed_pseudogene"; gene_status "KNOWN"; gene_name "MTND1P23"; transcript_type "unprocessed_pseudogene"; transcript_status "KNOWN"; transcript_name "MTND1P23-001"; exon_number 1; exon_id "ENSE00001797039.1"; level 2; transcript_support_level "NA"; ont "PGO:0000005"; tag "basic"; havana_gene "OTTHUMG00000002338.1"; hav…
chr1	629639	630683	ENSG00000225630.1	.	+	HAVANA	exon	.	gene_id "ENSG00000225630.1"; transcript_id "ENST00000457540.1"; gene_type "unprocessed_pseudogene"; gene_status "KNOWN"; gene_name "MTND2P28"; transcript_type "unprocessed_pseudogene"; transcript_status "KNOWN"; transcript_name "MTND2P28-001"; exon_number 1; exon_id "ENSE00001780589.1"; level 2; transcript_support_level "NA"; ont "PGO:0000005"; tag "basic"; havana_gene "OTTHUMG00000002336.1"; hav…
chr1	47165583	47165920	ENSG00000225514.1	.	-	HAVANA	exon	.	gene_id "ENSG00000225514.1"; transcript_id "ENST00000438556.1"; gene_type "transcribed_processed_pseudogene"; gene_status "KNOWN"; gene_name "MTND1P34"; transcript_type "transcribed_processed_pseudogene"; transcript_status "KNOWN"; transcript_name "MTND1P34-001"; exon_number 1; exon_id "ENSE00001782956.1"; level 2; transcript_support_level "NA"; ont "PGO:0000004"; ont "PGO:0000019"; tag "basic"; …
chr1	47164509	47164843	ENSG00000225514.1	.	-	HAVANA	exon	.	gene_id "ENSG00000225514.1"; transcript_id "ENST00000438556.1"; gene_type "transcribed_processed_pseudogene"; gene_status "KNOWN"; gene_name "MTND1P34"; transcript_type "transcribed_processed_pseudogene"; transcript_status "KNOWN"; transcript_name "MTND1P34-001"; exon_number 2; exon_id "ENSE00001802927.1"; level 2; transcript_support_level "NA"; ont "PGO:0000004"; ont "PGO:0000019"; tag "basic"; …
chr1	50017091	50017503	ENSG00000233595.2	.	+	HAVANA	exon	.	gene_id "ENSG00000233595.2"; transcript_id "ENST00000438595.2"; gene_type "processed_pseudogene"; gene_status "KNOWN"; gene_name "MTND2P29"; transcript_type "processed_pseudogene"; transcript_status "KNOWN"; transcript_name "MTND2P29-001"; exon_number 1; exon_id "ENSE00001690175.2"; level 2; transcript_support_level "NA"; ont "PGO:0000004"; tag "basic"; havana_gene "OTTHUMG00000008274.2"; havana_…
chr1	81080789	81081171	ENSG00000227937.1	.	+	HAVANA	exon	.	gene_id "ENSG00000227937.1"; transcript_id "ENST00000456663.1"; gene_type "processed_pseudogene"; gene_status "KNOWN"; gene_name "MTND2P30"; transcript_type "processed_pseudogene"; transcript_status "KNOWN"; transcript_name "MTND2P30-001"; exon_number 1; exon_id "ENSE00001627670.1"; level 2; transcript_support_level "NA"; ont "PGO:0000004"; tag "basic"; havana_gene "OTTHUMG00000010773.1"; havana_…
chr1	93923854	93923945	ENSG00000234099.1	.	-	HAVANA	exon	.	gene_id "ENSG00000234099.1"; transcript_id "ENST00000417020.1"; gene_type "unprocessed_pseudogene"; gene_status "KNOWN"; gene_name "MTND4P11"; transcript_type "unprocessed_pseudogene"; transcript_status "KNOWN"; transcript_name "MTND4P11-001"; exon_number 1; exon_id "ENSE00001610242.1"; level 2; transcript_support_level "NA"; ont "PGO:0000005"; tag "basic"; havana_gene "OTTHUMG00000010569.2"; hav…
chr1	93922573	93923540	ENSG00000234099.1	.	-	HAVANA	exon	.	gene_id "ENSG00000234099.1"; transcript_id "ENST00000417020.1"; gene_type "unprocessed_pseudogene"; gene_status "KNOWN"; gene_name "MTND4P11"; transcript_type "unprocessed_pseudogene"; transcript_status "KNOWN"; transcript_name "MTND4P11-001"; exon_number 2; exon_id "ENSE00001634511.1"; level 2; transcript_support_level "NA"; ont "PGO:0000005"; tag "basic"; havana_gene "OTTHUMG00000010569.2"; hav…
chr1	93924385	93924716	ENSG00000235794.1	.	-	HAVANA	exon	.	gene_id "ENSG00000235794.1"; transcript_id "ENST00000433774.1"; gene_type "unprocessed_pseudogene"; gene_status "KNOWN"; gene_name "MTND3P21"; transcript_type "unprocessed_pseudogene"; transcript_status "KNOWN"; transcript_name "MTND3P21-001"; exon_number 1; exon_id "ENSE00001767026.1"; level 2; transcript_support_level "NA"; ont "PGO:0000005"; tag "basic"; havana_gene "OTTHUMG00000010568.2"; hav…
chr1	113576756	113576899	ENSG00000238256.1	.	-	HAVANA	exon	.	gene_id "ENSG00000238256.1"; transcript_id "ENST00000448677.1"; gene_type "processed_pseudogene"; gene_status "KNOWN"; gene_name "MTND5P20"; transcript_type "processed_pseudogene"; transcript_status "KNOWN"; transcript_name "MTND5P20-001"; exon_number 1; exon_id "ENSE00001795080.1"; level 2; transcript_support_level "NA"; ont "PGO:0000004"; tag "basic"; havana_gene "OTTHUMG00000011801.1"; havana_…
chr1	235537519	235538041	ENSG00000235638.1	.	+	HAVANA	exon	.	gene_id "ENSG00000235638.1"; transcript_id "ENST00000433044.1"; gene_type "processed_pseudogene"; gene_status "KNOWN"; gene_name "MTND6P14"; transcript_type "processed_pseudogene"; transcript_status "KNOWN"; transcript_name "MTND6P14-001"; exon_number 1; exon_id "ENSE00001695342.1"; level 2; transcript_support_level "NA"; ont "PGO:0000004"; tag "basic"; havana_gene "OTTHUMG00000040746.1"; havana_…
chr1	235538051	235539845	ENSG00000231199.2	.	-	HAVANA	exon	.	gene_id "ENSG00000231199.2"; transcript_id "ENST00000424872.2"; gene_type "processed_pseudogene"; gene_status "KNOWN"; gene_name "MTND5P19"; transcript_type "processed_pseudogene"; transcript_status "KNOWN"; transcript_name "MTND5P19-001"; exon_number 1; exon_id "ENSE00001748484.2"; level 2; transcript_support_level "NA"; ont "PGO:0000004"; tag "basic"; havana_gene "OTTHUMG00000040745.2"; havana_…
chr1	235540052	235541415	ENSG00000226663.2	.	-	HAVANA	exon	.	gene_id "ENSG00000226663.2"; transcript_id "ENST00000446199.2"; gene_type "processed_pseudogene"; gene_status "KNOWN"; gene_name "MTND4P10"; transcript_type "processed_pseudogene"; transcript_status "KNOWN"; transcript_name "MTND4P10-001"; exon_number 1; exon_id "ENSE00001718091.2"; level 2; transcript_support_level "NA"; ont "PGO:0000004"; tag "basic"; havana_gene "OTTHUMG00000040744.2"; havana_…
chr1	235541411	235541706	ENSG00000231582.2	.	-	HAVANA	exon	.	gene_id "ENSG00000231582.2"; transcript_id "ENST00000415303.2"; gene_type "processed_pseudogene"; gene_status "KNOWN"; gene_name "MTND4LP21"; transcript_type "processed_pseudogene"; transcript_status "KNOWN"; transcript_name "MTND4LP21-001"; exon_number 1; exon_id "ENSE00001646610.2"; level 2; transcript_support_level "NA"; ont "PGO:0000004"; tag "basic"; havana_gene "OTTHUMG00000040743.2"; havan…
chr1	235541758	235542097	ENSG00000232714.1	.	-	HAVANA	exon	.	gene_id "ENSG00000232714.1"; transcript_id "ENST00000412909.1"; gene_type "processed_pseudogene"; gene_status "KNOWN"; gene_name "MTND3P8"; transcript_type "processed_pseudogene"; transcript_status "KNOWN"; transcript_name "MTND3P8-001"; exon_number 1; exon_id "ENSE00001683244.1"; level 2; transcript_support_level "NA"; ont "PGO:0000004"; tag "basic"; havana_gene "OTTHUMG00000040742.1"; havana_tr…
chr1	237949213	237949734	ENSG00000225723.1	.	+	HAVANA	exon	.	gene_id "ENSG00000225723.1"; transcript_id "ENST00000441157.1"; gene_type "processed_pseudogene"; gene_status "KNOWN"; gene_name "MTND6P15"; transcript_type "processed_pseudogene"; transcript_status "KNOWN"; transcript_name "MTND6P15-001"; exon_number 1; exon_id "ENSE00001707390.1"; level 2; transcript_support_level "NA"; ont "PGO:0000004"; tag "basic"; havana_gene "OTTHUMG00000039590.1"; havana_…
chr1	237949735	237951536	ENSG00000227860.1	.	-	HAVANA	exon	.	gene_id "ENSG00000227860.1"; transcript_id "ENST00000445624.1"; gene_type "processed_pseudogene"; gene_status "KNOWN"; gene_name "MTND5P18"; transcript_type "processed_pseudogene"; transcript_status "KNOWN"; transcript_name "MTND5P18-001"; exon_number 1; exon_id "ENSE00001636961.1"; level 2; transcript_support_level "NA"; ont "PGO:0000004"; tag "basic"; havana_gene "OTTHUMG00000039589.1"; havana_…
chr2	82814983	82815516	ENSG00000226700.1	.	+	HAVANA	exon	.	gene_id "ENSG00000226700.1"; transcript_id "ENST00000441039.1"; gene_type "processed_pseudogene"; gene_status "KNOWN"; gene_name "MTND4P25"; transcript_type "processed_pseudogene"; transcript_status "KNOWN"; transcript_name "MTND4P25-001"; exon_number 1; exon_id "ENSE00001639670.1"; level 2; transcript_support_level "NA"; ont "PGO:0000004"; tag "not_organism_supported"; tag "basic"; havana_gene "…
chr2	82815808	82817528	ENSG00000225045.1	.	+	HAVANA	exon	.	gene_id "ENSG00000225045.1"; transcript_id "ENST00000428871.1"; gene_type "processed_pseudogene"; gene_status "KNOWN"; gene_name "MTND5P27"; transcript_type "processed_pseudogene"; transcript_status "KNOWN"; transcript_name "MTND5P27-001"; exon_number 1; exon_id "ENSE00001685768.1"; level 2; transcript_support_level "NA"; ont "PGO:0000004"; tag "not_organism_supported"; tag "basic"; havana_gene "…
chr2	82817537	82818061	ENSG00000224695.1	.	-	HAVANA	exon	.	gene_id "ENSG00000224695.1"; transcript_id "ENST00000433237.1"; gene_type "processed_pseudogene"; gene_status "KNOWN"; gene_name "MTND6P7"; transcript_type "processed_pseudogene"; transcript_status "KNOWN"; transcript_name "MTND6P7-001"; exon_number 1; exon_id "ENSE00001733813.1"; level 2; transcript_support_level "NA"; ont "PGO:0000004"; tag "basic"; havana_gene "OTTHUMG00000152964.1"; havana_tr…
chr2	117023917	117024867	ENSG00000230158.1	.	+	HAVANA	exon	.	gene_id "ENSG00000230158.1"; transcript_id "ENST00000435623.1"; gene_type "unprocessed_pseudogene"; gene_status "KNOWN"; gene_name "MTND1P28"; transcript_type "unprocessed_pseudogene"; transcript_status "KNOWN"; transcript_name "MTND1P28-001"; exon_number 1; exon_id "ENSE00001746965.1"; level 2; transcript_support_level "NA"; ont "PGO:0000005"; tag "basic"; havana_gene "OTTHUMG00000153403.1"; hav…
chr2	117025076	117026118	ENSG00000230950.1	.	+	HAVANA	exon	.	gene_id "ENSG00000230950.1"; transcript_id "ENST00000436242.1"; gene_type "unprocessed_pseudogene"; gene_status "KNOWN"; gene_name "MTND2P21"; transcript_type "unprocessed_pseudogene"; transcript_status "KNOWN"; transcript_name "MTND2P21-001"; exon_number 1; exon_id "ENSE00001758807.1"; level 2; transcript_support_level "NA"; ont "PGO:0000005"; tag "basic"; havana_gene "OTTHUMG00000153401.1"; hav…
chr2	120212934	120213275	ENSG00000233286.1	.	+	HAVANA	exon	.	gene_id "ENSG00000233286.1"; transcript_id "ENST00000450967.1"; gene_type "processed_pseudogene"; gene_status "KNOWN"; gene_name "MTND3P10"; transcript_type "processed_pseudogene"; transcript_status "KNOWN"; transcript_name "MTND3P10-001"; exon_number 1; exon_id "ENSE00001738785.1"; level 2; transcript_support_level "NA"; ont "PGO:0000004"; tag "basic"; havana_gene "OTTHUMG00000154459.1"; havana_…
chr2	120213343	120213631	ENSG00000243104.1	.	+	HAVANA	exon	.	gene_id "ENSG00000243104.1"; transcript_id "ENST00000429447.1"; gene_type "processed_pseudogene"; gene_status "KNOWN"; gene_name "MTND4LP14"; transcript_type "processed_pseudogene"; transcript_status "KNOWN"; transcript_name "MTND4LP14-001"; exon_number 1; exon_id "ENSE00001722070.1"; level 2; transcript_support_level "NA"; ont "PGO:0000004"; tag "basic"; havana_gene "OTTHUMG00000154460.1"; havan…
chr2	120213630	120214989	ENSG00000234065.2	.	+	HAVANA	exon	.	gene_id "ENSG00000234065.2"; transcript_id "ENST00000415971.1"; gene_type "processed_pseudogene"; gene_status "KNOWN"; gene_name "MTND4P26"; transcript_type "processed_pseudogene"; transcript_status "KNOWN"; transcript_name "MTND4P26-001"; exon_number 1; exon_id "ENSE00001625077.1"; level 2; transcript_support_level "NA"; ont "PGO:0000004"; tag "basic"; havana_gene "OTTHUMG00000154456.1"; havana_…
chr2	120215180	120215595	ENSG00000223549.1	.	+	HAVANA	exon	.	gene_id "ENSG00000223549.1"; transcript_id "ENST00000438005.1"; gene_type "processed_pseudogene"; gene_status "KNOWN"; gene_name "MTND5P28"; transcript_type "processed_pseudogene"; transcript_status "KNOWN"; transcript_name "MTND5P28-001"; exon_number 1; exon_id "ENSE00001703242.1"; level 2; transcript_support_level "NA"; ont "PGO:0000004"; tag "basic"; havana_gene "OTTHUMG00000154458.1"; havana_…
chr2	120215899	120216349	ENSG00000223549.1	.	+	HAVANA	exon	.	gene_id "ENSG00000223549.1"; transcript_id "ENST00000438005.1"; gene_type "processed_pseudogene"; gene_status "KNOWN"; gene_name "MTND5P28"; transcript_type "processed_pseudogene"; transcript_status "KNOWN"; transcript_name "MTND5P28-001"; exon_number 2; exon_id "ENSE00001789856.1"; level 2; transcript_support_level "NA"; ont "PGO:0000004"; tag "basic"; havana_gene "OTTHUMG00000154458.1"; havana_…
chr2	120216550	120217279	ENSG00000223549.1	.	+	HAVANA	exon	.	gene_id "ENSG00000223549.1"; transcript_id "ENST00000438005.1"; gene_type "processed_pseudogene"; gene_status "KNOWN"; gene_name "MTND5P28"; transcript_type "processed_pseudogene"; transcript_status "KNOWN"; transcript_name "MTND5P28-001"; exon_number 3; exon_id "ENSE00001614758.1"; level 2; transcript_support_level "NA"; ont "PGO:0000004"; tag "basic"; havana_gene "OTTHUMG00000154458.1"; havana_…
chr2	124680721	124680916	ENSG00000238046.1	.	-	HAVANA	exon	.	gene_id "ENSG00000238046.1"; transcript_id "ENST00000458380.1"; gene_type "processed_pseudogene"; gene_status "KNOWN"; gene_name "MTND5P22"; transcript_type "processed_pseudogene"; transcript_status "KNOWN"; transcript_name "MTND5P22-001"; exon_number 1; exon_id "ENSE00001705105.1"; level 2; transcript_support_level "NA"; ont "PGO:0000004"; tag "basic"; havana_gene "OTTHUMG00000153364.1"; havana_…
chr2	130270595	130270675	ENSG00000237722.1	.	+	HAVANA	exon	.	gene_id "ENSG00000237722.1"; transcript_id "ENST00000448112.1"; gene_type "unprocessed_pseudogene"; gene_status "KNOWN"; gene_name "MTND1P29"; transcript_type "unprocessed_pseudogene"; transcript_status "KNOWN"; transcript_name "MTND1P29-001"; exon_number 1; exon_id "ENSE00001709864.1"; level 2; transcript_support_level "NA"; ont "PGO:0000005"; tag "basic"; havana_gene "OTTHUMG00000153776.1"; hav…
chr2	130271791	130272272	ENSG00000237722.1	.	+	HAVANA	exon	.	gene_id "ENSG00000237722.1"; transcript_id "ENST00000448112.1"; gene_type "unprocessed_pseudogene"; gene_status "KNOWN"; gene_name "MTND1P29"; transcript_type "unprocessed_pseudogene"; transcript_status "KNOWN"; transcript_name "MTND1P29-001"; exon_number 2; exon_id "ENSE00001680296.1"; level 2; transcript_support_level "NA"; ont "PGO:0000005"; tag "basic"; havana_gene "OTTHUMG00000153776.1"; hav…
chr2	130272478	130273511	ENSG00000231954.1	.	+	HAVANA	exon	.	gene_id "ENSG00000231954.1"; transcript_id "ENST00000444325.1"; gene_type "unprocessed_pseudogene"; gene_status "KNOWN"; gene_name "MTND2P22"; transcript_type "unprocessed_pseudogene"; transcript_status "KNOWN"; transcript_name "MTND2P22-001"; exon_number 1; exon_id "ENSE00001734949.1"; level 2; transcript_support_level "NA"; ont "PGO:0000005"; tag "basic"; havana_gene "OTTHUMG00000153770.1"; hav…
chr2	130278756	130280110	ENSG00000230548.1	.	+	HAVANA	exon	.	gene_id "ENSG00000230548.1"; transcript_id "ENST00000450813.1"; gene_type "unprocessed_pseudogene"; gene_status "KNOWN"; gene_name "MTND4P27"; transcript_type "unprocessed_pseudogene"; transcript_status "KNOWN"; transcript_name "MTND4P27-001"; exon_number 1; exon_id "ENSE00001802810.1"; level 2; transcript_support_level "NA"; ont "PGO:0000005"; tag "basic"; havana_gene "OTTHUMG00000153772.1"; hav…
chr2	130280298	130282105	ENSG00000234934.1	.	+	HAVANA	exon	.	gene_id "ENSG00000234934.1"; transcript_id "ENST00000458676.1"; gene_type "unprocessed_pseudogene"; gene_status "KNOWN"; gene_name "MTND5P29"; transcript_type "unprocessed_pseudogene"; transcript_status "KNOWN"; transcript_name "MTND5P29-001"; exon_number 1; exon_id "ENSE00001720372.1"; level 2; transcript_support_level "NA"; ont "PGO:0000005"; tag "basic"; havana_gene "OTTHUMG00000153769.1"; hav…
chr2	130282084	130282606	ENSG00000248136.1	.	-	HAVANA	exon	.	gene_id "ENSG00000248136.1"; transcript_id "ENST00000503471.1"; gene_type "unprocessed_pseudogene"; gene_status "KNOWN"; gene_name "MTND6P8"; transcript_type "unprocessed_pseudogene"; transcript_status "KNOWN"; transcript_name "MTND6P8-001"; exon_number 1; exon_id "ENSE00002047141.1"; level 2; transcript_support_level "NA"; ont "PGO:0000005"; tag "basic"; havana_gene "OTTHUMG00000153773.1"; havan…
chr2	131369784	131370301	ENSG00000227275.1	.	+	HAVANA	exon	.	gene_id "ENSG00000227275.1"; transcript_id "ENST00000437240.1"; gene_type "unprocessed_pseudogene"; gene_status "KNOWN"; gene_name "MTND6P10"; transcript_type "unprocessed_pseudogene"; transcript_status "KNOWN"; transcript_name "MTND6P10-001"; exon_number 1; exon_id "ENSE00001639811.1"; level 2; transcript_support_level "NA"; ont "PGO:0000005"; tag "basic"; havana_gene "OTTHUMG00000153555.1"; hav…
chr2	131370420	131372075	ENSG00000235080.1	.	-	HAVANA	exon	.	gene_id "ENSG00000235080.1"; transcript_id "ENST00000430812.1"; gene_type "unprocessed_pseudogene"; gene_status "KNOWN"; gene_name "MTND5P23"; transcript_type "unprocessed_pseudogene"; transcript_status "KNOWN"; transcript_name "MTND5P23-001"; exon_number 1; exon_id "ENSE00001628803.1"; level 2; transcript_support_level "NA"; ont "PGO:0000005"; tag "basic"; havana_gene "OTTHUMG00000153599.1"; hav…
chr2	131372293	131373650	ENSG00000231777.1	.	-	HAVANA	exon	.	gene_id "ENSG00000231777.1"; transcript_id "ENST00000453886.1"; gene_type "unprocessed_pseudogene"; gene_status "KNOWN"; gene_name "MTND4P21"; transcript_type "unprocessed_pseudogene"; transcript_status "KNOWN"; transcript_name "MTND4P21-001"; exon_number 1; exon_id "ENSE00001613813.1"; level 2; transcript_support_level "NA"; ont "PGO:0000005"; tag "basic"; havana_gene "OTTHUMG00000153572.1"; hav…
chr2	131384460	131385490	ENSG00000234939.1	.	-	HAVANA	exon	.	gene_id "ENSG00000234939.1"; transcript_id "ENST00000419962.1"; gene_type "unprocessed_pseudogene"; gene_status "KNOWN"; gene_name "MTND2P18"; transcript_type "unprocessed_pseudogene"; transcript_status "KNOWN"; transcript_name "MTND2P18-001"; exon_number 1; exon_id "ENSE00001595701.1"; level 2; transcript_support_level "NA"; ont "PGO:0000005"; tag "basic"; havana_gene "OTTHUMG00000153597.1"; hav…
chr2	131385699	131386237	ENSG00000234576.1	.	-	HAVANA	exon	.	gene_id "ENSG00000234576.1"; transcript_id "ENST00000440488.1"; gene_type "unprocessed_pseudogene"; gene_status "KNOWN"; gene_name "MTND1P26"; transcript_type "unprocessed_pseudogene"; transcript_status "KNOWN"; transcript_name "MTND1P26-001"; exon_number 1; exon_id "ENSE00001774389.1"; level 2; transcript_support_level "NA"; ont "PGO:0000005"; tag "basic"; havana_gene "OTTHUMG00000153566.1"; hav…
chr2	140219663	140220368	ENSG00000231567.1	.	-	HAVANA	exon	.	gene_id "ENSG00000231567.1"; transcript_id "ENST00000449129.1"; gene_type "unprocessed_pseudogene"; gene_status "KNOWN"; gene_name "MTND2P19"; transcript_type "unprocessed_pseudogene"; transcript_status "KNOWN"; transcript_name "MTND2P19-001"; exon_number 1; exon_id "ENSE00001732444.1"; level 2; transcript_support_level "NA"; ont "PGO:0000005"; tag "not_organism_supported"; tag "basic"; havana_ge…
chr2	140217650	140217957	ENSG00000231567.1	.	-	HAVANA	exon	.	gene_id "ENSG00000231567.1"; transcript_id "ENST00000449129.1"; gene_type "unprocessed_pseudogene"; gene_status "KNOWN"; gene_name "MTND2P19"; transcript_type "unprocessed_pseudogene"; transcript_status "KNOWN"; transcript_name "MTND2P19-001"; exon_number 2; exon_id "ENSE00001775083.1"; level 2; transcript_support_level "NA"; ont "PGO:0000005"; tag "not_organism_supported"; tag "basic"; havana_ge…
chr2	140220583	140221485	ENSG00000223921.1	.	-	HAVANA	exon	.	gene_id "ENSG00000223921.1"; transcript_id "ENST00000451117.1"; gene_type "processed_pseudogene"; gene_status "KNOWN"; gene_name "MTND1P27"; transcript_type "processed_pseudogene"; transcript_status "KNOWN"; transcript_name "MTND1P27-001"; exon_number 1; exon_id "ENSE00001604987.1"; level 2; transcript_support_level "NA"; ont "PGO:0000004"; tag "not_organism_supported"; tag "basic"; havana_gene "…
chr2	143094232	143094715	ENSG00000226839.1	.	+	HAVANA	exon	.	gene_id "ENSG00000226839.1"; transcript_id "ENST00000431890.1"; gene_type "processed_pseudogene"; gene_status "KNOWN"; gene_name "MTND6P11"; transcript_type "processed_pseudogene"; transcript_status "KNOWN"; transcript_name "MTND6P11-001"; exon_number 1; exon_id "ENSE00001700727.1"; level 2; transcript_support_level "NA"; ont "PGO:0000004"; tag "basic"; havana_gene "OTTHUMG00000153842.1"; havana_…
chr2	143094788	143096555	ENSG00000224852.1	.	-	HAVANA	exon	.	gene_id "ENSG00000224852.1"; transcript_id "ENST00000438892.1"; gene_type "processed_pseudogene"; gene_status "KNOWN"; gene_name "MTND5P24"; transcript_type "processed_pseudogene"; transcript_status "KNOWN"; transcript_name "MTND5P24-001"; exon_number 1; exon_id "ENSE00001617586.1"; level 2; transcript_support_level "NA"; ont "PGO:0000004"; tag "basic"; havana_gene "OTTHUMG00000153819.2"; havana_…
chr2	143096838	143098007	ENSG00000232772.1	.	-	HAVANA	exon	.	gene_id "ENSG00000232772.1"; transcript_id "ENST00000413116.1"; gene_type "processed_pseudogene"; gene_status "KNOWN"; gene_name "MTND4P22"; transcript_type "processed_pseudogene"; transcript_status "KNOWN"; transcript_name "MTND4P22-001"; exon_number 1; exon_id "ENSE00001744428.1"; level 2; transcript_support_level "NA"; ont "PGO:0000004"; tag "basic"; havana_gene "OTTHUMG00000153840.1"; havana_…
chr2	143098122	143098417	ENSG00000236300.2	.	-	HAVANA	exon	.	gene_id "ENSG00000236300.2"; transcript_id "ENST00000448237.2"; gene_type "processed_pseudogene"; gene_status "KNOWN"; gene_name "MTND4LP12"; transcript_type "processed_pseudogene"; transcript_status "KNOWN"; transcript_name "MTND4LP12-001"; exon_number 1; exon_id "ENSE00001796650.2"; level 2; transcript_support_level "NA"; ont "PGO:0000004"; tag "basic"; havana_gene "OTTHUMG00000153839.2"; havan…
chr2	143098483	143098829	ENSG00000227557.1	.	-	HAVANA	exon	.	gene_id "ENSG00000227557.1"; transcript_id "ENST00000429526.1"; gene_type "processed_pseudogene"; gene_status "KNOWN"; gene_name "MTND3P9"; transcript_type "processed_pseudogene"; transcript_status "KNOWN"; transcript_name "MTND3P9-001"; exon_number 1; exon_id "ENSE00001787558.1"; level 2; transcript_support_level "NA"; ont "PGO:0000004"; tag "basic"; havana_gene "OTTHUMG00000153937.1"; havana_tr…
chr2	155264162	155264823	ENSG00000229701.1	.	-	HAVANA	exon	.	gene_id "ENSG00000229701.1"; transcript_id "ENST00000440805.1"; gene_type "processed_pseudogene"; gene_status "KNOWN"; gene_name "MTND2P20"; transcript_type "processed_pseudogene"; transcript_status "KNOWN"; transcript_name "MTND2P20-001"; exon_number 1; exon_id "ENSE00001711049.1"; level 2; transcript_support_level "NA"; ont "PGO:0000004"; tag "not_organism_supported"; tag "basic"; havana_gene "…
chr2	155311022	155311409	ENSG00000233709.1	.	+	HAVANA	exon	.	gene_id "ENSG00000233709.1"; transcript_id "ENST00000426217.1"; gene_type "processed_pseudogene"; gene_status "KNOWN"; gene_name "MTND4P28"; transcript_type "processed_pseudogene"; transcript_status "KNOWN"; transcript_name "MTND4P28-001"; exon_number 1; exon_id "ENSE00001658201.1"; level 2; transcript_support_level "NA"; ont "PGO:0000004"; tag "not_organism_supported"; tag "basic"; havana_gene "…
chr2	155311696	155313427	ENSG00000233039.1	.	+	HAVANA	exon	.	gene_id "ENSG00000233039.1"; transcript_id "ENST00000452896.1"; gene_type "processed_pseudogene"; gene_status "KNOWN"; gene_name "MTND5P30"; transcript_type "processed_pseudogene"; transcript_status "KNOWN"; transcript_name "MTND5P30-001"; exon_number 1; exon_id "ENSE00001619535.1"; level 2; transcript_support_level "NA"; ont "PGO:0000004"; tag "basic"; havana_gene "OTTHUMG00000153814.1"; havana_…
chr2	155313439	155313958	ENSG00000233248.1	.	-	HAVANA	exon	.	gene_id "ENSG00000233248.1"; transcript_id "ENST00000458075.1"; gene_type "processed_pseudogene"; gene_status "KNOWN"; gene_name "MTND6P9"; transcript_type "processed_pseudogene"; transcript_status "KNOWN"; transcript_name "MTND6P9-001"; exon_number 1; exon_id "ENSE00001801089.1"; level 2; transcript_support_level "NA"; ont "PGO:0000004"; tag "basic"; havana_gene "OTTHUMG00000153813.1"; havana_tr…
chr2	201212282	201213081	ENSG00000227348.1	.	-	HAVANA	exon	.	gene_id "ENSG00000227348.1"; transcript_id "ENST00000430499.1"; gene_type "unprocessed_pseudogene"; gene_status "KNOWN"; gene_name "MTND5P25"; transcript_type "unprocessed_pseudogene"; transcript_status "KNOWN"; transcript_name "MTND5P25-001"; exon_number 1; exon_id "ENSE00001696816.1"; level 2; transcript_support_level "NA"; ont "PGO:0000005"; tag "basic"; havana_gene "OTTHUMG00000154740.1"; hav…
chr2	201213297	201214660	ENSG00000225796.2	.	-	HAVANA	exon	.	gene_id "ENSG00000225796.2"; transcript_id "ENST00000447723.1"; gene_type "unprocessed_pseudogene"; gene_status "KNOWN"; gene_name "MTND4P23"; transcript_type "unprocessed_pseudogene"; transcript_status "KNOWN"; transcript_name "MTND4P23-001"; exon_number 1; exon_id "ENSE00001740383.1"; level 2; transcript_support_level "NA"; ont "PGO:0000005"; tag "basic"; havana_gene "OTTHUMG00000154739.1"; hav…
chr2	201214652	201214950	ENSG00000235318.3	.	-	HAVANA	exon	.	gene_id "ENSG00000235318.3"; transcript_id "ENST00000425022.2"; gene_type "unprocessed_pseudogene"; gene_status "KNOWN"; gene_name "MTND4LP13"; transcript_type "unprocessed_pseudogene"; transcript_status "KNOWN"; transcript_name "MTND4LP13-001"; exon_number 1; exon_id "ENSE00001694970.2"; level 2; transcript_support_level "NA"; ont "PGO:0000005"; tag "basic"; havana_gene "OTTHUMG00000154738.1"; h…
chr2	201553687	201554031	ENSG00000224590.1	.	+	HAVANA	exon	.	gene_id "ENSG00000224590.1"; transcript_id "ENST00000452205.1"; gene_type "unprocessed_pseudogene"; gene_status "KNOWN"; gene_name "MTND3P16"; transcript_type "unprocessed_pseudogene"; transcript_status "KNOWN"; transcript_name "MTND3P16-001"; exon_number 1; exon_id "ENSE00001607822.1"; level 2; transcript_support_level "NA"; ont "PGO:0000005"; tag "basic"; havana_gene "OTTHUMG00000154755.1"; hav…
chr2	201554095	201554390	ENSG00000234731.2	.	+	HAVANA	exon	.	gene_id "ENSG00000234731.2"; transcript_id "ENST00000440828.1"; gene_type "unprocessed_pseudogene"; gene_status "KNOWN"; gene_name "MTND4LP16"; transcript_type "unprocessed_pseudogene"; transcript_status "KNOWN"; transcript_name "MTND4LP16-001"; exon_number 1; exon_id "ENSE00001690438.1"; level 2; transcript_support_level "NA"; ont "PGO:0000005"; tag "basic"; havana_gene "OTTHUMG00000154758.1"; h…
chr2	201554383	201555228	ENSG00000249177.1	.	+	HAVANA	exon	.	gene_id "ENSG00000249177.1"; transcript_id "ENST00000503122.1"; gene_type "unprocessed_pseudogene"; gene_status "KNOWN"; gene_name "MTND4P29"; transcript_type "unprocessed_pseudogene"; transcript_status "KNOWN"; transcript_name "MTND4P29-001"; exon_number 1; exon_id "ENSE00002084944.1"; level 2; transcript_support_level "NA"; ont "PGO:0000005"; tag "basic"; havana_gene "OTTHUMG00000154760.1"; hav…
chr2	201555524	201556051	ENSG00000249177.1	.	+	HAVANA	exon	.	gene_id "ENSG00000249177.1"; transcript_id "ENST00000503122.1"; gene_type "unprocessed_pseudogene"; gene_status "KNOWN"; gene_name "MTND4P29"; transcript_type "unprocessed_pseudogene"; transcript_status "KNOWN"; transcript_name "MTND4P29-001"; exon_number 2; exon_id "ENSE00002061790.1"; level 2; transcript_support_level "NA"; ont "PGO:0000005"; tag "basic"; havana_gene "OTTHUMG00000154760.1"; hav…
chr2	201556891	201558265	ENSG00000227841.1	.	+	HAVANA	exon	.	gene_id "ENSG00000227841.1"; transcript_id "ENST00000419366.1"; gene_type "unprocessed_pseudogene"; gene_status "KNOWN"; gene_name "MTND5P31"; transcript_type "unprocessed_pseudogene"; transcript_status "KNOWN"; transcript_name "MTND5P31-001"; exon_number 1; exon_id "ENSE00001758926.1"; level 2; transcript_support_level "NA"; ont "PGO:0000005"; tag "basic"; havana_gene "OTTHUMG00000154757.1"; hav…
chr2	202617283	202617627	ENSG00000233134.1	.	+	HAVANA	exon	.	gene_id "ENSG00000233134.1"; transcript_id "ENST00000416968.1"; gene_type "unprocessed_pseudogene"; gene_status "KNOWN"; gene_name "MTND3P17"; transcript_type "unprocessed_pseudogene"; transcript_status "KNOWN"; transcript_name "MTND3P17-001"; exon_number 1; exon_id "ENSE00001715582.1"; level 2; transcript_support_level "NA"; ont "PGO:0000005"; tag "basic"; havana_gene "OTTHUMG00000154680.2"; hav…
chr2	202617694	202617987	ENSG00000241221.2	.	+	HAVANA	exon	.	gene_id "ENSG00000241221.2"; transcript_id "ENST00000414607.2"; gene_type "unprocessed_pseudogene"; gene_status "KNOWN"; gene_name "MTND4LP17"; transcript_type "unprocessed_pseudogene"; transcript_status "KNOWN"; transcript_name "MTND4LP17-001"; exon_number 1; exon_id "ENSE00001663302.2"; level 2; transcript_support_level "NA"; ont "PGO:0000005"; tag "basic"; havana_gene "OTTHUMG00000154672.3"; h…
chr2	202617982	202618881	ENSG00000227454.2	.	+	HAVANA	exon	.	gene_id "ENSG00000227454.2"; transcript_id "ENST00000450281.1"; gene_type "unprocessed_pseudogene"; gene_status "KNOWN"; gene_name "MTND4P30"; transcript_type "unprocessed_pseudogene"; transcript_status "KNOWN"; transcript_name "MTND4P30-001"; exon_number 1; exon_id "ENSE00001775152.1"; level 2; transcript_support_level "NA"; ont "PGO:0000005"; tag "basic"; havana_gene "OTTHUMG00000154679.1"; hav…
chr2	211777205	211777856	ENSG00000232631.1	.	+	HAVANA	exon	.	gene_id "ENSG00000232631.1"; transcript_id "ENST00000422990.1"; gene_type "processed_pseudogene"; gene_status "KNOWN"; gene_name "MTND2P23"; transcript_type "processed_pseudogene"; transcript_status "KNOWN"; transcript_name "MTND2P23-001"; exon_number 1; exon_id "ENSE00001783954.1"; level 2; transcript_support_level "NA"; ont "PGO:0000004"; tag "basic"; havana_gene "OTTHUMG00000154766.1"; havana_…
chr3	29797651	29797825	ENSG00000227795.1	.	-	HAVANA	exon	.	gene_id "ENSG00000227795.1"; transcript_id "ENST00000427694.1"; gene_type "processed_pseudogene"; gene_status "KNOWN"; gene_name "MTND4LP9"; transcript_type "processed_pseudogene"; transcript_status "KNOWN"; transcript_name "MTND4LP9-001"; exon_number 1; exon_id "ENSE00001787803.1"; level 2; transcript_support_level "NA"; ont "PGO:0000004"; tag "basic"; havana_gene "OTTHUMG00000155734.1"; havana_…
chr3	106894351	106895718	ENSG00000241787.1	.	-	HAVANA	exon	.	gene_id "ENSG00000241787.1"; transcript_id "ENST00000466108.1"; gene_type "unprocessed_pseudogene"; gene_status "KNOWN"; gene_name "MTND4P16"; transcript_type "unprocessed_pseudogene"; transcript_status "KNOWN"; transcript_name "MTND4P16-001"; exon_number 1; exon_id "ENSE00001926871.1"; level 2; transcript_support_level "NA"; ont "PGO:0000005"; tag "basic"; havana_gene "OTTHUMG00000159166.1"; hav…
chr3	106896294	106896408	ENSG00000239632.1	.	-	HAVANA	exon	.	gene_id "ENSG00000239632.1"; transcript_id "ENST00000468320.1"; gene_type "unprocessed_pseudogene"; gene_status "KNOWN"; gene_name "MTND4LP3"; transcript_type "unprocessed_pseudogene"; transcript_status "KNOWN"; transcript_name "MTND4LP3-001"; exon_number 1; exon_id "ENSE00001839769.1"; level 2; transcript_support_level "NA"; ont "PGO:0000005"; tag "basic"; havana_gene "OTTHUMG00000159165.1"; hav…
chr3	106895728	106895890	ENSG00000239632.1	.	-	HAVANA	exon	.	gene_id "ENSG00000239632.1"; transcript_id "ENST00000468320.1"; gene_type "unprocessed_pseudogene"; gene_status "KNOWN"; gene_name "MTND4LP3"; transcript_type "unprocessed_pseudogene"; transcript_status "KNOWN"; transcript_name "MTND4LP3-001"; exon_number 2; exon_id "ENSE00001948623.1"; level 2; transcript_support_level "NA"; ont "PGO:0000005"; tag "basic"; havana_gene "OTTHUMG00000159165.1"; hav…
chr3	106896482	106896821	ENSG00000242214.1	.	-	HAVANA	exon	.	gene_id "ENSG00000242214.1"; transcript_id "ENST00000485242.1"; gene_type "unprocessed_pseudogene"; gene_status "KNOWN"; gene_name "MTND3P6"; transcript_type "unprocessed_pseudogene"; transcript_status "KNOWN"; transcript_name "MTND3P6-001"; exon_number 1; exon_id "ENSE00001841684.1"; level 2; transcript_support_level "NA"; ont "PGO:0000005"; tag "basic"; havana_gene "OTTHUMG00000159164.1"; havan…
chr3	106898888	106900591	ENSG00000243658.1	.	+	HAVANA	exon	.	gene_id "ENSG00000243658.1"; transcript_id "ENST00000460269.1"; gene_type "unprocessed_pseudogene"; gene_status "KNOWN"; gene_name "MTND5P16"; transcript_type "unprocessed_pseudogene"; transcript_status "KNOWN"; transcript_name "MTND5P16-001"; exon_number 1; exon_id "ENSE00001819542.1"; level 2; transcript_support_level "NA"; ont "PGO:0000005"; tag "basic"; havana_gene "OTTHUMG00000159140.1"; hav…
chr3	106900592	106900855	ENSG00000240034.1	.	-	HAVANA	exon	.	gene_id "ENSG00000240034.1"; transcript_id "ENST00000478031.1"; gene_type "unprocessed_pseudogene"; gene_status "KNOWN"; gene_name "MTND6P6"; transcript_type "unprocessed_pseudogene"; transcript_status "KNOWN"; transcript_name "MTND6P6-001"; exon_number 1; exon_id "ENSE00001864238.1"; level 2; transcript_support_level "NA"; ont "PGO:0000005"; tag "basic"; havana_gene "OTTHUMG00000159144.1"; havan…
chr3	106901067	106901965	ENSG00000239586.1	.	+	HAVANA	exon	.	gene_id "ENSG00000239586.1"; transcript_id "ENST00000465177.1"; gene_type "unprocessed_pseudogene"; gene_status "KNOWN"; gene_name "MTND1P16"; transcript_type "unprocessed_pseudogene"; transcript_status "KNOWN"; transcript_name "MTND1P16-001"; exon_number 1; exon_id "ENSE00001915257.1"; level 2; transcript_support_level "NA"; ont "PGO:0000005"; tag "basic"; havana_gene "OTTHUMG00000159141.1"; hav…
chr3	106902172	106902523	ENSG00000240796.1	.	+	HAVANA	exon	.	gene_id "ENSG00000240796.1"; transcript_id "ENST00000482139.1"; gene_type "unprocessed_pseudogene"; gene_status "KNOWN"; gene_name "MTND2P14"; transcript_type "unprocessed_pseudogene"; transcript_status "KNOWN"; transcript_name "MTND2P14-001"; exon_number 1; exon_id "ENSE00001844847.1"; level 2; transcript_support_level "NA"; ont "PGO:0000005"; tag "basic"; havana_gene "OTTHUMG00000159142.1"; hav…
chr3	166160020	166160370	ENSG00000242178.1	.	-	HAVANA	exon	.	gene_id "ENSG00000242178.1"; transcript_id "ENST00000470444.1"; gene_type "processed_pseudogene"; gene_status "KNOWN"; gene_name "MTND4P17"; transcript_type "processed_pseudogene"; transcript_status "KNOWN"; transcript_name "MTND4P17-001"; exon_number 1; exon_id "ENSE00001911444.1"; level 2; transcript_support_level "NA"; ont "PGO:0000004"; tag "basic"; havana_gene "OTTHUMG00000158171.1"; havana_…
chr3	166160413	166160704	ENSG00000240084.1	.	-	HAVANA	exon	.	gene_id "ENSG00000240084.1"; transcript_id "ENST00000435146.2"; gene_type "processed_pseudogene"; gene_status "KNOWN"; gene_name "MTND4LP10"; transcript_type "processed_pseudogene"; transcript_status "KNOWN"; transcript_name "MTND4LP10-001"; exon_number 1; exon_id "ENSE00001637918.2"; level 2; transcript_support_level "NA"; ont "PGO:0000004"; tag "basic"; havana_gene "OTTHUMG00000158214.1"; havan…
chr3	166160776	166161119	ENSG00000240824.1	.	-	HAVANA	exon	.	gene_id "ENSG00000240824.1"; transcript_id "ENST00000474435.1"; gene_type "processed_pseudogene"; gene_status "KNOWN"; gene_name "MTND3P7"; transcript_type "processed_pseudogene"; transcript_status "KNOWN"; transcript_name "MTND3P7-001"; exon_number 1; exon_id "ENSE00001938181.1"; level 2; transcript_support_level "NA"; ont "PGO:0000004"; tag "basic"; havana_gene "OTTHUMG00000158212.1"; havana_tr…
chr3	177010718	177011067	ENSG00000231888.1	.	-	HAVANA	exon	.	gene_id "ENSG00000231888.1"; transcript_id "ENST00000434246.1"; gene_type "processed_pseudogene"; gene_status "KNOWN"; gene_name "MTND5P15"; transcript_type "processed_pseudogene"; transcript_status "KNOWN"; transcript_name "MTND5P15-001"; exon_number 1; exon_id "ENSE00001793536.1"; level 2; transcript_support_level "NA"; ont "PGO:0000004"; tag "basic"; havana_gene "OTTHUMG00000157221.1"; havana_…
chr4	14505864	14506480	ENSG00000251252.1	.	-	HAVANA	exon	.	gene_id "ENSG00000251252.1"; transcript_id "ENST00000512602.1"; gene_type "processed_pseudogene"; gene_status "KNOWN"; gene_name "MTND2P31"; transcript_type "processed_pseudogene"; transcript_status "KNOWN"; transcript_name "MTND2P31-001"; exon_number 1; exon_id "ENSE00002038465.1"; level 2; transcript_support_level "NA"; ont "PGO:0000004"; tag "basic"; havana_gene "OTTHUMG00000160120.1"; havana_…
chr4	17061877	17062165	ENSG00000251212.1	.	+	HAVANA	exon	.	gene_id "ENSG00000251212.1"; transcript_id "ENST00000514978.1"; gene_type "processed_pseudogene"; gene_status "KNOWN"; gene_name "MTND5P4"; transcript_type "processed_pseudogene"; transcript_status "KNOWN"; transcript_name "MTND5P4-001"; exon_number 1; exon_id "ENSE00002075891.1"; level 2; transcript_support_level "NA"; ont "PGO:0000004"; tag "basic"; havana_gene "OTTHUMG00000160230.1"; havana_tr…
chr4	25719214	25719745	ENSG00000250050.1	.	-	HAVANA	exon	.	gene_id "ENSG00000250050.1"; transcript_id "ENST00000507819.1"; gene_type "unprocessed_pseudogene"; gene_status "KNOWN"; gene_name "MTND4P9"; transcript_type "unprocessed_pseudogene"; transcript_status "KNOWN"; transcript_name "MTND4P9-001"; exon_number 1; exon_id "ENSE00002056485.1"; level 2; transcript_support_level "NA"; ont "PGO:0000005"; tag "basic"; havana_gene "OTTHUMG00000160336.1"; havan…
chr4	25718081	25718896	ENSG00000250050.1	.	-	HAVANA	exon	.	gene_id "ENSG00000250050.1"; transcript_id "ENST00000507819.1"; gene_type "unprocessed_pseudogene"; gene_status "KNOWN"; gene_name "MTND4P9"; transcript_type "unprocessed_pseudogene"; transcript_status "KNOWN"; transcript_name "MTND4P9-001"; exon_number 2; exon_id "ENSE00002037758.1"; level 2; transcript_support_level "NA"; ont "PGO:0000005"; tag "basic"; havana_gene "OTTHUMG00000160336.1"; havan…
chr4	25719754	25720030	ENSG00000248133.1	.	-	HAVANA	exon	.	gene_id "ENSG00000248133.1"; transcript_id "ENST00000508209.1"; gene_type "unprocessed_pseudogene"; gene_status "KNOWN"; gene_name "MTND4LP22"; transcript_type "unprocessed_pseudogene"; transcript_status "KNOWN"; transcript_name "MTND4LP22-001"; exon_number 1; exon_id "ENSE00002027959.1"; level 2; transcript_support_level "NA"; ont "PGO:0000005"; tag "basic"; havana_gene "OTTHUMG00000160334.1"; h…
chr4	25720098	25720431	ENSG00000251353.1	.	-	HAVANA	exon	.	gene_id "ENSG00000251353.1"; transcript_id "ENST00000512798.1"; gene_type "unprocessed_pseudogene"; gene_status "KNOWN"; gene_name "MTND3P5"; transcript_type "unprocessed_pseudogene"; transcript_status "KNOWN"; transcript_name "MTND3P5-001"; exon_number 1; exon_id "ENSE00002053905.1"; level 2; transcript_support_level "NA"; ont "PGO:0000005"; tag "basic"; havana_gene "OTTHUMG00000160335.1"; havan…
chr4	49246600	49246693	ENSG00000248946.2	.	+	HAVANA	exon	.	gene_id "ENSG00000248946.2"; transcript_id "ENST00000510932.2"; gene_type "processed_pseudogene"; gene_status "KNOWN"; gene_name "MTND3P22"; transcript_type "processed_pseudogene"; transcript_status "KNOWN"; transcript_name "MTND3P22-001"; exon_number 1; exon_id "ENSE00003049857.1"; level 2; transcript_support_level "NA"; ont "PGO:0000004"; tag "basic"; havana_gene "OTTHUMG00000163192.2"; havana_…
chr4	49246765	49246915	ENSG00000248946.2	.	+	HAVANA	exon	.	gene_id "ENSG00000248946.2"; transcript_id "ENST00000510932.2"; gene_type "processed_pseudogene"; gene_status "KNOWN"; gene_name "MTND3P22"; transcript_type "processed_pseudogene"; transcript_status "KNOWN"; transcript_name "MTND3P22-001"; exon_number 2; exon_id "ENSE00002064046.2"; level 2; transcript_support_level "NA"; ont "PGO:0000004"; tag "basic"; havana_gene "OTTHUMG00000163192.2"; havana_…
chr4	64608904	64609424	ENSG00000249893.1	.	+	HAVANA	exon	.	gene_id "ENSG00000249893.1"; transcript_id "ENST00000504006.1"; gene_type "unprocessed_pseudogene"; gene_status "KNOWN"; gene_name "MTND6P16"; transcript_type "unprocessed_pseudogene"; transcript_status "KNOWN"; transcript_name "MTND6P16-001"; exon_number 1; exon_id "ENSE00002025238.1"; level 2; transcript_support_level "NA"; ont "PGO:0000005"; tag "basic"; havana_gene "OTTHUMG00000162340.1"; hav…
chr4	64609453	64610532	ENSG00000250169.1	.	-	HAVANA	exon	.	gene_id "ENSG00000250169.1"; transcript_id "ENST00000513046.1"; gene_type "processed_pseudogene"; gene_status "KNOWN"; gene_name "MTND5P13"; transcript_type "processed_pseudogene"; transcript_status "KNOWN"; transcript_name "MTND5P13-001"; exon_number 1; exon_id "ENSE00002037859.1"; level 1; transcript_support_level "NA"; ont "PGO:0000004"; tag "pseudo_consens"; tag "basic"; havana_gene "OTTHUMG0…
chr4	64610615	64610909	ENSG00000248259.1	.	-	HAVANA	exon	.	gene_id "ENSG00000248259.1"; transcript_id "ENST00000514859.1"; gene_type "unprocessed_pseudogene"; gene_status "KNOWN"; gene_name "MTND4LP31"; transcript_type "unprocessed_pseudogene"; transcript_status "KNOWN"; transcript_name "MTND4LP31-001"; exon_number 1; exon_id "ENSE00002075717.1"; level 1; transcript_support_level "NA"; ont "PGO:0000005"; tag "pseudo_consens"; tag "basic"; havana_gene "OT…
chr4	64610979	64611308	ENSG00000249045.1	.	-	HAVANA	exon	.	gene_id "ENSG00000249045.1"; transcript_id "ENST00000506306.1"; gene_type "unprocessed_pseudogene"; gene_status "KNOWN"; gene_name "MTND3P24"; transcript_type "unprocessed_pseudogene"; transcript_status "KNOWN"; transcript_name "MTND3P24-001"; exon_number 1; exon_id "ENSE00002037760.1"; level 1; transcript_support_level "NA"; ont "PGO:0000005"; tag "pseudo_consens"; tag "basic"; havana_gene "OTTH…
chr4	92702344	92702659	ENSG00000251449.2	.	+	HAVANA	exon	.	gene_id "ENSG00000251449.2"; transcript_id "ENST00000511780.2"; gene_type "processed_pseudogene"; gene_status "KNOWN"; gene_name "MTND1P19"; transcript_type "processed_pseudogene"; transcript_status "KNOWN"; transcript_name "MTND1P19-001"; exon_number 1; exon_id "ENSE00002034643.2"; level 2; transcript_support_level "NA"; ont "PGO:0000004"; tag "basic"; havana_gene "OTTHUMG00000160924.2"; havana_…
chr4	101972422	101972798	ENSG00000251149.1	.	+	HAVANA	exon	.	gene_id "ENSG00000251149.1"; transcript_id "ENST00000503764.1"; gene_type "processed_pseudogene"; gene_status "KNOWN"; gene_name "MTND5P5"; transcript_type "processed_pseudogene"; transcript_status "KNOWN"; transcript_name "MTND5P5-001"; exon_number 1; exon_id "ENSE00002027861.1"; level 2; transcript_support_level "NA"; ont "PGO:0000004"; tag "basic"; havana_gene "OTTHUMG00000160965.1"; havana_tr…
chr4	155452525	155453044	ENSG00000249770.1	.	+	HAVANA	exon	.	gene_id "ENSG00000249770.1"; transcript_id "ENST00000511811.1"; gene_type "unprocessed_pseudogene"; gene_status "KNOWN"; gene_name "MTND6P17"; transcript_type "unprocessed_pseudogene"; transcript_status "KNOWN"; transcript_name "MTND6P17-001"; exon_number 1; exon_id "ENSE00002047853.1"; level 2; transcript_support_level "NA"; ont "PGO:0000005"; tag "basic"; havana_gene "OTTHUMG00000161806.1"; hav…
chr4	155453048	155454803	ENSG00000248748.1	.	-	HAVANA	exon	.	gene_id "ENSG00000248748.1"; transcript_id "ENST00000503854.1"; gene_type "unprocessed_pseudogene"; gene_status "KNOWN"; gene_name "MTND5P9"; transcript_type "unprocessed_pseudogene"; transcript_status "KNOWN"; transcript_name "MTND5P9-001"; exon_number 1; exon_id "ENSE00002047265.1"; level 2; transcript_support_level "NA"; ont "PGO:0000005"; tag "basic"; havana_gene "OTTHUMG00000161699.2"; havan…
chr4	155455049	155456411	ENSG00000248548.1	.	-	HAVANA	exon	.	gene_id "ENSG00000248548.1"; transcript_id "ENST00000514997.1"; gene_type "unprocessed_pseudogene"; gene_status "KNOWN"; gene_name "MTND4P8"; transcript_type "unprocessed_pseudogene"; transcript_status "KNOWN"; transcript_name "MTND4P8-001"; exon_number 1; exon_id "ENSE00002067351.1"; level 2; transcript_support_level "NA"; ont "PGO:0000005"; tag "basic"; havana_gene "OTTHUMG00000161821.1"; havan…
chr4	155456912	155456981	ENSG00000249127.1	.	-	HAVANA	exon	.	gene_id "ENSG00000249127.1"; transcript_id "ENST00000505004.1"; gene_type "unprocessed_pseudogene"; gene_status "KNOWN"; gene_name "MTND3P3"; transcript_type "unprocessed_pseudogene"; transcript_status "KNOWN"; transcript_name "MTND3P3-001"; exon_number 1; exon_id "ENSE00002072544.1"; level 2; transcript_support_level "NA"; ont "PGO:0000005"; tag "basic"; havana_gene "OTTHUMG00000161926.1"; havan…
chr4	155456637	155456694	ENSG00000249127.1	.	-	HAVANA	exon	.	gene_id "ENSG00000249127.1"; transcript_id "ENST00000505004.1"; gene_type "unprocessed_pseudogene"; gene_status "KNOWN"; gene_name "MTND3P3"; transcript_type "unprocessed_pseudogene"; transcript_status "KNOWN"; transcript_name "MTND3P3-001"; exon_number 2; exon_id "ENSE00002057275.1"; level 2; transcript_support_level "NA"; ont "PGO:0000005"; tag "basic"; havana_gene "OTTHUMG00000161926.1"; havan…
chr4	155461632	155462663	ENSG00000248907.1	.	-	HAVANA	exon	.	gene_id "ENSG00000248907.1"; transcript_id "ENST00000506452.1"; gene_type "unprocessed_pseudogene"; gene_status "KNOWN"; gene_name "MTND2P33"; transcript_type "unprocessed_pseudogene"; transcript_status "KNOWN"; transcript_name "MTND2P33-001"; exon_number 1; exon_id "ENSE00002040895.1"; level 2; transcript_support_level "NA"; ont "PGO:0000005"; tag "basic"; havana_gene "OTTHUMG00000161812.1"; hav…
chr4	155462872	155463823	ENSG00000251407.1	.	-	HAVANA	exon	.	gene_id "ENSG00000251407.1"; transcript_id "ENST00000510572.1"; gene_type "unprocessed_pseudogene"; gene_status "KNOWN"; gene_name "MTND1P22"; transcript_type "unprocessed_pseudogene"; transcript_status "KNOWN"; transcript_name "MTND1P22-001"; exon_number 1; exon_id "ENSE00002051284.1"; level 2; transcript_support_level "NA"; ont "PGO:0000005"; tag "basic"; havana_gene "OTTHUMG00000161807.1"; hav…
chr5	8618580	8619104	ENSG00000250389.1	.	-	HAVANA	exon	.	gene_id "ENSG00000250389.1"; transcript_id "ENST00000512226.1"; gene_type "processed_pseudogene"; gene_status "KNOWN"; gene_name "MTND6P2"; transcript_type "processed_pseudogene"; transcript_status "KNOWN"; transcript_name "MTND6P2-001"; exon_number 1; exon_id "ENSE00002074410.1"; level 2; transcript_support_level "NA"; ont "PGO:0000004"; tag "basic"; havana_gene "OTTHUMG00000161719.1"; havana_tr…
chr5	94567460	94568909	ENSG00000251544.1	.	+	HAVANA	exon	.	gene_id "ENSG00000251544.1"; transcript_id "ENST00000502851.1"; gene_type "processed_pseudogene"; gene_status "KNOWN"; gene_name "MTND5P12"; transcript_type "processed_pseudogene"; transcript_status "KNOWN"; transcript_name "MTND5P12-001"; exon_number 1; exon_id "ENSE00002070160.1"; level 2; transcript_support_level "NA"; ont "PGO:0000004"; tag "basic"; havana_gene "OTTHUMG00000162663.1"; havana_…
chr5	94568928	94569470	ENSG00000254132.1	.	-	HAVANA	exon	.	gene_id "ENSG00000254132.1"; transcript_id "ENST00000520612.1"; gene_type "processed_pseudogene"; gene_status "KNOWN"; gene_name "MTND6P3"; transcript_type "processed_pseudogene"; transcript_status "KNOWN"; transcript_name "MTND6P3-001"; exon_number 1; exon_id "ENSE00002137276.1"; level 2; transcript_support_level "NA"; ont "PGO:0000004"; tag "basic"; havana_gene "OTTHUMG00000164091.2"; havana_tr…
chr5	100046449	100046970	ENSG00000270230.1	.	+	HAVANA	exon	.	gene_id "ENSG00000270230.1"; transcript_id "ENST00000604233.1"; gene_type "processed_pseudogene"; gene_status "KNOWN"; gene_name "MTND6P22"; transcript_type "processed_pseudogene"; transcript_status "KNOWN"; transcript_name "MTND6P22-001"; exon_number 1; exon_id "ENSE00003647131.1"; level 2; transcript_support_level "NA"; ont "PGO:0000004"; tag "basic"; havana_gene "OTTHUMG00000185127.1"; havana_…
chr5	100046976	100048785	ENSG00000271687.1	.	-	HAVANA	exon	.	gene_id "ENSG00000271687.1"; transcript_id "ENST00000603719.1"; gene_type "processed_pseudogene"; gene_status "KNOWN"; gene_name "MTND5P10"; transcript_type "processed_pseudogene"; transcript_status "KNOWN"; transcript_name "MTND5P10-001"; exon_number 1; exon_id "ENSE00003673744.1"; level 2; transcript_support_level "NA"; ont "PGO:0000004"; tag "basic"; havana_gene "OTTHUMG00000185128.1"; havana_…
chr5	100048987	100050362	ENSG00000270906.1	.	-	HAVANA	exon	.	gene_id "ENSG00000270906.1"; transcript_id "ENST00000604257.1"; gene_type "processed_pseudogene"; gene_status "KNOWN"; gene_name "MTND4P35"; transcript_type "processed_pseudogene"; transcript_status "KNOWN"; transcript_name "MTND4P35-001"; exon_number 1; exon_id "ENSE00003583029.1"; level 2; transcript_support_level "NA"; ont "PGO:0000004"; tag "basic"; havana_gene "OTTHUMG00000185129.1"; havana_…
chr5	100050358	100050650	ENSG00000270350.1	.	-	HAVANA	exon	.	gene_id "ENSG00000270350.1"; transcript_id "ENST00000605152.1"; gene_type "processed_pseudogene"; gene_status "KNOWN"; gene_name "MTND4LP5"; transcript_type "processed_pseudogene"; transcript_status "KNOWN"; transcript_name "MTND4LP5-001"; exon_number 1; exon_id "ENSE00003466880.1"; level 2; transcript_support_level "NA"; ont "PGO:0000004"; tag "basic"; havana_gene "OTTHUMG00000185130.1"; havana_…
chr5	100050718	100051063	ENSG00000271480.1	.	-	HAVANA	exon	.	gene_id "ENSG00000271480.1"; transcript_id "ENST00000603825.1"; gene_type "processed_pseudogene"; gene_status "KNOWN"; gene_name "MTND3P19"; transcript_type "processed_pseudogene"; transcript_status "KNOWN"; transcript_name "MTND3P19-001"; exon_number 1; exon_id "ENSE00003577071.1"; level 2; transcript_support_level "NA"; ont "PGO:0000004"; tag "basic"; havana_gene "OTTHUMG00000185131.1"; havana_…
chr5	134924122	134924644	ENSG00000249119.1	.	+	HAVANA	exon	.	gene_id "ENSG00000249119.1"; transcript_id "ENST00000506002.1"; gene_type "processed_pseudogene"; gene_status "KNOWN"; gene_name "MTND6P4"; transcript_type "processed_pseudogene"; transcript_status "KNOWN"; transcript_name "MTND6P4-001"; exon_number 1; exon_id "ENSE00002036044.1"; level 2; transcript_support_level "NA"; ont "PGO:0000004"; tag "basic"; havana_gene "OTTHUMG00000163065.1"; havana_tr…
chr5	134924647	134926459	ENSG00000248923.1	.	-	HAVANA	exon	.	gene_id "ENSG00000248923.1"; transcript_id "ENST00000511037.1"; gene_type "processed_pseudogene"; gene_status "KNOWN"; gene_name "MTND5P11"; transcript_type "processed_pseudogene"; transcript_status "KNOWN"; transcript_name "MTND5P11-001"; exon_number 1; exon_id "ENSE00002068675.1"; level 2; transcript_support_level "NA"; ont "PGO:0000004"; tag "basic"; havana_gene "OTTHUMG00000163063.1"; havana_…
chr5	134926659	134928036	ENSG00000247627.2	.	-	HAVANA	exon	.	gene_id "ENSG00000247627.2"; transcript_id "ENST00000498999.2"; gene_type "processed_pseudogene"; gene_status "KNOWN"; gene_name "MTND4P12"; transcript_type "processed_pseudogene"; transcript_status "KNOWN"; transcript_name "MTND4P12-001"; exon_number 1; exon_id "ENSE00002043691.1"; level 2; transcript_support_level "NA"; ont "PGO:0000004"; tag "basic"; havana_gene "OTTHUMG00000163066.1"; havana_…
chr5	134928029	134928326	ENSG00000198868.3	.	-	HAVANA	exon	.	gene_id "ENSG00000198868.3"; transcript_id "ENST00000454092.1"; gene_type "processed_pseudogene"; gene_status "KNOWN"; gene_name "MTND4LP30"; transcript_type "processed_pseudogene"; transcript_status "KNOWN"; transcript_name "MTND4LP30-001"; exon_number 1; exon_id "ENSE00001606316.1"; level 2; transcript_support_level "NA"; ont "PGO:0000004"; tag "basic"; havana_gene "OTTHUMG00000163074.1"; havan…
chr5	134928392	134928527	ENSG00000249192.1	.	-	HAVANA	exon	.	gene_id "ENSG00000249192.1"; transcript_id "ENST00000509243.1"; gene_type "processed_pseudogene"; gene_status "KNOWN"; gene_name "MTND3P25"; transcript_type "processed_pseudogene"; transcript_status "KNOWN"; transcript_name "MTND3P25-001"; exon_number 1; exon_id "ENSE00002037879.1"; level 2; transcript_support_level "NA"; ont "PGO:0000004"; tag "basic"; havana_gene "OTTHUMG00000163071.1"; havana_…
chr6	91727158	91727324	ENSG00000219087.2	.	+	HAVANA	exon	.	gene_id "ENSG00000219087.2"; transcript_id "ENST00000403051.2"; gene_type "processed_pseudogene"; gene_status "KNOWN"; gene_name "MTND4LP19"; transcript_type "processed_pseudogene"; transcript_status "KNOWN"; transcript_name "MTND4LP19-001"; exon_number 1; exon_id "ENSE00001548207.2"; level 2; transcript_support_level "NA"; ont "PGO:0000004"; tag "basic"; havana_gene "OTTHUMG00000015220.2"; havan…
chr6	153668176	153668362	ENSG00000220733.1	.	+	HAVANA	exon	.	gene_id "ENSG00000220733.1"; transcript_id "ENST00000407663.1"; gene_type "processed_pseudogene"; gene_status "KNOWN"; gene_name "MTND3P20"; transcript_type "processed_pseudogene"; transcript_status "KNOWN"; transcript_name "MTND3P20-001"; exon_number 1; exon_id "ENSE00001561671.1"; level 2; transcript_support_level "NA"; ont "PGO:0000004"; tag "basic"; havana_gene "OTTHUMG00000015865.1"; havana_…
chr6	153668588	153668858	ENSG00000220514.1	.	+	HAVANA	exon	.	gene_id "ENSG00000220514.1"; transcript_id "ENST00000402379.1"; gene_type "processed_pseudogene"; gene_status "KNOWN"; gene_name "MTND4LP20"; transcript_type "processed_pseudogene"; transcript_status "KNOWN"; transcript_name "MTND4LP20-001"; exon_number 1; exon_id "ENSE00001547339.1"; level 2; transcript_support_level "NA"; ont "PGO:0000004"; tag "basic"; havana_gene "OTTHUMG00000015866.1"; havan…
chr6	153668878	153669901	ENSG00000216713.1	.	+	HAVANA	exon	.	gene_id "ENSG00000216713.1"; transcript_id "ENST00000402078.1"; gene_type "processed_pseudogene"; gene_status "KNOWN"; gene_name "MTND4P13"; transcript_type "processed_pseudogene"; transcript_status "KNOWN"; transcript_name "MTND4P13-001"; exon_number 1; exon_id "ENSE00001557402.1"; level 2; transcript_support_level "NA"; ont "PGO:0000004"; tag "basic"; havana_gene "OTTHUMG00000015867.1"; havana_…
chr7	57169405	57170771	ENSG00000225295.1	.	+	HAVANA	exon	.	gene_id "ENSG00000225295.1"; transcript_id "ENST00000439033.1"; gene_type "unprocessed_pseudogene"; gene_status "KNOWN"; gene_name "MTND4P4"; transcript_type "unprocessed_pseudogene"; transcript_status "KNOWN"; transcript_name "MTND4P4-001"; exon_number 1; exon_id "ENSE00001619136.1"; level 2; transcript_support_level "NA"; ont "PGO:0000005"; tag "basic"; havana_gene "OTTHUMG00000156690.1"; havan…
chr7	57170973	57172771	ENSG00000228440.1	.	+	HAVANA	exon	.	gene_id "ENSG00000228440.1"; transcript_id "ENST00000422338.1"; gene_type "unprocessed_pseudogene"; gene_status "KNOWN"; gene_name "MTND5P6"; transcript_type "unprocessed_pseudogene"; transcript_status "KNOWN"; transcript_name "MTND5P6-001"; exon_number 1; exon_id "ENSE00001681043.1"; level 2; transcript_support_level "NA"; ont "PGO:0000005"; tag "basic"; havana_gene "OTTHUMG00000156679.1"; havan…
chr7	57185787	57186202	ENSG00000230764.1	.	+	HAVANA	exon	.	gene_id "ENSG00000230764.1"; transcript_id "ENST00000435196.1"; gene_type "unprocessed_pseudogene"; gene_status "KNOWN"; gene_name "MTND1P4"; transcript_type "unprocessed_pseudogene"; transcript_status "KNOWN"; transcript_name "MTND1P4-001"; exon_number 1; exon_id "ENSE00001709680.1"; level 2; transcript_support_level "NA"; ont "PGO:0000005"; tag "basic"; havana_gene "OTTHUMG00000156687.1"; havan…
chr7	57186411	57187441	ENSG00000237309.1	.	+	HAVANA	exon	.	gene_id "ENSG00000237309.1"; transcript_id "ENST00000455337.1"; gene_type "unprocessed_pseudogene"; gene_status "KNOWN"; gene_name "MTND2P6"; transcript_type "unprocessed_pseudogene"; transcript_status "KNOWN"; transcript_name "MTND2P6-001"; exon_number 1; exon_id "ENSE00001733247.1"; level 1; transcript_support_level "NA"; ont "PGO:0000005"; tag "pseudo_consens"; tag "basic"; havana_gene "OTTHUM…
chr7	57192693	57194068	ENSG00000227584.1	.	+	HAVANA	exon	.	gene_id "ENSG00000227584.1"; transcript_id "ENST00000435821.1"; gene_type "unprocessed_pseudogene"; gene_status "KNOWN"; gene_name "MTND4P5"; transcript_type "unprocessed_pseudogene"; transcript_status "KNOWN"; transcript_name "MTND4P5-001"; exon_number 1; exon_id "ENSE00001783141.1"; level 2; transcript_support_level "NA"; ont "PGO:0000005"; tag "basic"; havana_gene "OTTHUMG00000156680.1"; havan…
chr7	57194256	57196054	ENSG00000230531.1	.	+	HAVANA	exon	.	gene_id "ENSG00000230531.1"; transcript_id "ENST00000413558.1"; gene_type "unprocessed_pseudogene"; gene_status "KNOWN"; gene_name "MTND5P7"; transcript_type "unprocessed_pseudogene"; transcript_status "KNOWN"; transcript_name "MTND5P7-001"; exon_number 1; exon_id "ENSE00001702556.1"; level 2; transcript_support_level "NA"; ont "PGO:0000005"; tag "basic"; havana_gene "OTTHUMG00000156692.1"; havan…
chr7	64104092	64105295	ENSG00000248704.1	.	-	HAVANA	exon	.	gene_id "ENSG00000248704.1"; transcript_id "ENST00000507767.1"; gene_type "unprocessed_pseudogene"; gene_status "KNOWN"; gene_name "MTND4P2"; transcript_type "unprocessed_pseudogene"; transcript_status "KNOWN"; transcript_name "MTND4P2-001"; exon_number 1; exon_id "ENSE00002039792.1"; level 2; transcript_support_level "NA"; ont "PGO:0000005"; tag "basic"; havana_gene "OTTHUMG00000156480.1"; havan…
chr7	64105291	64105576	ENSG00000248315.1	.	-	HAVANA	exon	.	gene_id "ENSG00000248315.1"; transcript_id "ENST00000502312.1"; gene_type "unprocessed_pseudogene"; gene_status "KNOWN"; gene_name "MTND4LP2"; transcript_type "unprocessed_pseudogene"; transcript_status "KNOWN"; transcript_name "MTND4LP2-001"; exon_number 1; exon_id "ENSE00002022197.1"; level 2; transcript_support_level "NA"; ont "PGO:0000005"; tag "basic"; havana_gene "OTTHUMG00000156473.1"; hav…
chr7	64105653	64105995	ENSG00000230052.1	.	-	HAVANA	exon	.	gene_id "ENSG00000230052.1"; transcript_id "ENST00000438452.1"; gene_type "unprocessed_pseudogene"; gene_status "KNOWN"; gene_name "MTND3P2"; transcript_type "unprocessed_pseudogene"; transcript_status "KNOWN"; transcript_name "MTND3P2-001"; exon_number 1; exon_id "ENSE00001722799.1"; level 2; transcript_support_level "NA"; ont "PGO:0000005"; tag "basic"; havana_gene "OTTHUMG00000156478.1"; havan…
chr7	64110546	64111550	ENSG00000230252.1	.	-	HAVANA	exon	.	gene_id "ENSG00000230252.1"; transcript_id "ENST00000445034.1"; gene_type "unprocessed_pseudogene"; gene_status "KNOWN"; gene_name "MTND2P4"; transcript_type "unprocessed_pseudogene"; transcript_status "KNOWN"; transcript_name "MTND2P4-001"; exon_number 1; exon_id "ENSE00001789072.1"; level 2; transcript_support_level "NA"; ont "PGO:0000005"; tag "basic"; havana_gene "OTTHUMG00000156475.1"; havan…
chr7	64111751	64112572	ENSG00000235646.1	.	-	HAVANA	exon	.	gene_id "ENSG00000235646.1"; transcript_id "ENST00000430604.1"; gene_type "unprocessed_pseudogene"; gene_status "KNOWN"; gene_name "MTND1P2"; transcript_type "unprocessed_pseudogene"; transcript_status "KNOWN"; transcript_name "MTND1P2-001"; exon_number 1; exon_id "ENSE00001697623.1"; level 2; transcript_support_level "NA"; ont "PGO:0000005"; tag "basic"; havana_gene "OTTHUMG00000156488.1"; havan…
chr7	68266318	68266859	ENSG00000225959.1	.	-	HAVANA	exon	.	gene_id "ENSG00000225959.1"; transcript_id "ENST00000417829.1"; gene_type "unprocessed_pseudogene"; gene_status "KNOWN"; gene_name "MTND4P3"; transcript_type "unprocessed_pseudogene"; transcript_status "KNOWN"; transcript_name "MTND4P3-001"; exon_number 1; exon_id "ENSE00001761766.1"; level 2; transcript_support_level "NA"; ont "PGO:0000005"; tag "basic"; havana_gene "OTTHUMG00000156580.2"; havan…
chr7	112372646	112373729	ENSG00000230999.1	.	+	HAVANA	exon	.	gene_id "ENSG00000230999.1"; transcript_id "ENST00000449817.1"; gene_type "unprocessed_pseudogene"; gene_status "KNOWN"; gene_name "MTND5P8"; transcript_type "unprocessed_pseudogene"; transcript_status "KNOWN"; transcript_name "MTND5P8-001"; exon_number 1; exon_id "ENSE00001748076.1"; level 2; transcript_support_level "NA"; ont "PGO:0000005"; tag "basic"; havana_gene "OTTHUMG00000155121.1"; havan…
chr7	112373732	112374250	ENSG00000232922.1	.	-	HAVANA	exon	.	gene_id "ENSG00000232922.1"; transcript_id "ENST00000440466.1"; gene_type "unprocessed_pseudogene"; gene_status "KNOWN"; gene_name "MTND6P24"; transcript_type "unprocessed_pseudogene"; transcript_status "KNOWN"; transcript_name "MTND6P24-001"; exon_number 1; exon_id "ENSE00001760961.1"; level 2; transcript_support_level "NA"; ont "PGO:0000005"; tag "basic"; havana_gene "OTTHUMG00000155123.1"; hav…
chr7	117263916	117264388	ENSG00000224042.2	.	+	HAVANA	exon	.	gene_id "ENSG00000224042.2"; transcript_id "ENST00000438297.2"; gene_type "processed_pseudogene"; gene_status "KNOWN"; gene_name "MTND4P6"; transcript_type "processed_pseudogene"; transcript_status "KNOWN"; transcript_name "MTND4P6-001"; exon_number 1; exon_id "ENSE00001647604.2"; level 1; transcript_support_level "NA"; ont "PGO:0000004"; tag "pseudo_consens"; tag "basic"; havana_gene "OTTHUMG000…
chr7	141802481	141803487	ENSG00000224354.2	.	-	HAVANA	exon	.	gene_id "ENSG00000224354.2"; transcript_id "ENST00000432656.2"; gene_type "processed_pseudogene"; gene_status "KNOWN"; gene_name "MTND2P5"; transcript_type "processed_pseudogene"; transcript_status "KNOWN"; transcript_name "MTND2P5-001"; exon_number 1; exon_id "ENSE00001739800.2"; level 2; transcript_support_level "NA"; ont "PGO:0000004"; tag "basic"; havana_gene "OTTHUMG00000157636.1"; havana_tr…
chr7	141803700	141804652	ENSG00000239648.1	.	-	HAVANA	exon	.	gene_id "ENSG00000239648.1"; transcript_id "ENST00000484956.1"; gene_type "processed_pseudogene"; gene_status "KNOWN"; gene_name "MTND1P3"; transcript_type "processed_pseudogene"; transcript_status "KNOWN"; transcript_name "MTND1P3-001"; exon_number 1; exon_id "ENSE00001838897.1"; level 2; transcript_support_level "NA"; ont "PGO:0000004"; tag "basic"; havana_gene "OTTHUMG00000157635.1"; havana_tr…
chr8	13353400	13353530	ENSG00000253257.1	.	-	HAVANA	exon	.	gene_id "ENSG00000253257.1"; transcript_id "ENST00000523876.1"; gene_type "processed_pseudogene"; gene_status "KNOWN"; gene_name "MTND4P7"; transcript_type "processed_pseudogene"; transcript_status "KNOWN"; transcript_name "MTND4P7-001"; exon_number 1; exon_id "ENSE00002134764.1"; level 2; transcript_support_level "NA"; ont "PGO:0000004"; tag "basic"; havana_gene "OTTHUMG00000163951.1"; havana_tr…
chr8	18200923	18201205	ENSG00000254015.1	.	-	HAVANA	exon	.	gene_id "ENSG00000254015.1"; transcript_id "ENST00000518144.1"; gene_type "processed_pseudogene"; gene_status "KNOWN"; gene_name "MTND4LP26"; transcript_type "processed_pseudogene"; transcript_status "KNOWN"; transcript_name "MTND4LP26-001"; exon_number 1; exon_id "ENSE00002096088.1"; level 2; transcript_support_level "NA"; ont "PGO:0000004"; tag "basic"; havana_gene "OTTHUMG00000163793.1"; havan…
chr8	33014080	33015026	ENSG00000254346.2	.	+	HAVANA	exon	.	gene_id "ENSG00000254346.2"; transcript_id "ENST00000523621.2"; gene_type "processed_pseudogene"; gene_status "KNOWN"; gene_name "MTND1P6"; transcript_type "processed_pseudogene"; transcript_status "KNOWN"; transcript_name "MTND1P6-001"; exon_number 1; exon_id "ENSE00002090480.2"; level 2; transcript_support_level "NA"; ont "PGO:0000004"; tag "basic"; havana_gene "OTTHUMG00000163931.2"; havana_tr…
chr8	33015260	33015928	ENSG00000254090.1	.	+	HAVANA	exon	.	gene_id "ENSG00000254090.1"; transcript_id "ENST00000521584.1"; gene_type "processed_pseudogene"; gene_status "KNOWN"; gene_name "MTND2P32"; transcript_type "processed_pseudogene"; transcript_status "KNOWN"; transcript_name "MTND2P32-001"; exon_number 1; exon_id "ENSE00002092507.1"; level 2; transcript_support_level "NA"; ont "PGO:0000004"; tag "basic"; havana_gene "OTTHUMG00000163932.3"; havana_…
chr8	33016673	33017043	ENSG00000254090.1	.	+	HAVANA	exon	.	gene_id "ENSG00000254090.1"; transcript_id "ENST00000521584.1"; gene_type "processed_pseudogene"; gene_status "KNOWN"; gene_name "MTND2P32"; transcript_type "processed_pseudogene"; transcript_status "KNOWN"; transcript_name "MTND2P32-001"; exon_number 2; exon_id "ENSE00002138753.1"; level 2; transcript_support_level "NA"; ont "PGO:0000004"; tag "basic"; havana_gene "OTTHUMG00000163932.3"; havana_…
chr8	36278959	36279483	ENSG00000254384.1	.	+	HAVANA	exon	.	gene_id "ENSG00000254384.1"; transcript_id "ENST00000519399.1"; gene_type "unprocessed_pseudogene"; gene_status "KNOWN"; gene_name "MTND6P19"; transcript_type "unprocessed_pseudogene"; transcript_status "KNOWN"; transcript_name "MTND6P19-001"; exon_number 1; exon_id "ENSE00002134019.1"; level 2; transcript_support_level "NA"; ont "PGO:0000005"; tag "basic"; havana_gene "OTTHUMG00000163975.1"; hav…
chr8	36279490	36279696	ENSG00000253685.1	.	-	HAVANA	exon	.	gene_id "ENSG00000253685.1"; transcript_id "ENST00000517498.1"; gene_type "unprocessed_pseudogene"; gene_status "KNOWN"; gene_name "MTND5P41"; transcript_type "unprocessed_pseudogene"; transcript_status "KNOWN"; transcript_name "MTND5P41-001"; exon_number 1; exon_id "ENSE00002135505.1"; level 2; transcript_support_level "NA"; ont "PGO:0000005"; tag "basic"; havana_gene "OTTHUMG00000163976.1"; hav…
chr8	46827227	46827894	ENSG00000253828.3	.	-	HAVANA	exon	.	gene_id "ENSG00000253828.3"; transcript_id "ENST00000522536.3"; gene_type "unprocessed_pseudogene"; gene_status "KNOWN"; gene_name "MTND2P38"; transcript_type "unprocessed_pseudogene"; transcript_status "KNOWN"; transcript_name "MTND2P38-001"; exon_number 1; exon_id "ENSE00002106047.3"; level 2; transcript_support_level "NA"; ont "PGO:0000005"; tag "basic"; havana_gene "OTTHUMG00000164131.3"; hav…
chr8	46828116	46828413	ENSG00000282321.1	.	-	HAVANA	exon	.	gene_id "ENSG00000282321.1"; transcript_id "ENST00000632801.1"; gene_type "unprocessed_pseudogene"; gene_status "KNOWN"; gene_name "MTND1P7"; transcript_type "unprocessed_pseudogene"; transcript_status "KNOWN"; transcript_name "MTND1P7-001"; exon_number 1; exon_id "ENSE00003782781.1"; level 2; transcript_support_level "NA"; ont "PGO:0000005"; tag "basic"; havana_gene "OTTHUMG00000191367.1"; havan…
chr8	46838787	46839205	ENSG00000254156.1	.	+	HAVANA	exon	.	gene_id "ENSG00000254156.1"; transcript_id "ENST00000522986.1"; gene_type "transcribed_processed_pseudogene"; gene_status "KNOWN"; gene_name "MTND6P20"; transcript_type "transcribed_processed_pseudogene"; transcript_status "KNOWN"; transcript_name "MTND6P20-001"; exon_number 1; exon_id "ENSE00002123811.1"; level 2; transcript_support_level "NA"; ont "PGO:0000004"; ont "PGO:0000019"; tag "basic"; …
chr8	103085650	103086590	ENSG00000253795.1	.	+	HAVANA	exon	.	gene_id "ENSG00000253795.1"; transcript_id "ENST00000517906.1"; gene_type "processed_pseudogene"; gene_status "KNOWN"; gene_name "MTND1P5"; transcript_type "processed_pseudogene"; transcript_status "KNOWN"; transcript_name "MTND1P5-001"; exon_number 1; exon_id "ENSE00002090660.1"; level 2; transcript_support_level "NA"; ont "PGO:0000004"; tag "basic"; havana_gene "OTTHUMG00000164801.1"; havana_tr…
chr8	133754810	133755450	ENSG00000253970.1	.	+	HAVANA	exon	.	gene_id "ENSG00000253970.1"; transcript_id "ENST00000521337.1"; gene_type "processed_pseudogene"; gene_status "KNOWN"; gene_name "MTND2P7"; transcript_type "processed_pseudogene"; transcript_status "KNOWN"; transcript_name "MTND2P7-001"; exon_number 1; exon_id "ENSE00002105113.1"; level 2; transcript_support_level "NA"; ont "PGO:0000004"; tag "basic"; havana_gene "OTTHUMG00000164535.1"; havana_tr…
chr9	5091092	5091604	ENSG00000227730.2	.	+	HAVANA	exon	.	gene_id "ENSG00000227730.2"; transcript_id "ENST00000448266.2"; gene_type "unprocessed_pseudogene"; gene_status "KNOWN"; gene_name "MTND6P5"; transcript_type "unprocessed_pseudogene"; transcript_status "KNOWN"; transcript_name "MTND6P5-001"; exon_number 1; exon_id "ENSE00001780374.2"; level 2; transcript_support_level "NA"; ont "PGO:0000005"; tag "basic"; havana_gene "OTTHUMG00000019484.2"; havan…
chr9	5094138	5095014	ENSG00000228166.1	.	+	HAVANA	exon	.	gene_id "ENSG00000228166.1"; transcript_id "ENST00000456661.1"; gene_type "unprocessed_pseudogene"; gene_status "KNOWN"; gene_name "MTND1P11"; transcript_type "unprocessed_pseudogene"; transcript_status "KNOWN"; transcript_name "MTND1P11-001"; exon_number 1; exon_id "ENSE00001789040.1"; level 2; transcript_support_level "NA"; ont "PGO:0000005"; tag "basic"; havana_gene "OTTHUMG00000019492.1"; hav…
chr9	5107936	5109290	ENSG00000236254.1	.	+	HAVANA	exon	.	gene_id "ENSG00000236254.1"; transcript_id "ENST00000435799.1"; gene_type "unprocessed_pseudogene"; gene_status "KNOWN"; gene_name "MTND4P14"; transcript_type "unprocessed_pseudogene"; transcript_status "KNOWN"; transcript_name "MTND4P14-001"; exon_number 1; exon_id "ENSE00001597315.1"; level 2; transcript_support_level "NA"; ont "PGO:0000005"; tag "basic"; havana_gene "OTTHUMG00000019486.1"; hav…
chr9	5109495	5110762	ENSG00000230225.1	.	+	HAVANA	exon	.	gene_id "ENSG00000230225.1"; transcript_id "ENST00000441481.1"; gene_type "unprocessed_pseudogene"; gene_status "KNOWN"; gene_name "MTND5P14"; transcript_type "unprocessed_pseudogene"; transcript_status "KNOWN"; transcript_name "MTND5P14-001"; exon_number 1; exon_id "ENSE00001792335.1"; level 2; transcript_support_level "NA"; ont "PGO:0000005"; tag "basic"; havana_gene "OTTHUMG00000019481.1"; hav…
chr9	78741719	78742744	ENSG00000237257.1	.	-	HAVANA	exon	.	gene_id "ENSG00000237257.1"; transcript_id "ENST00000450555.1"; gene_type "unprocessed_pseudogene"; gene_status "KNOWN"; gene_name "MTND2P8"; transcript_type "unprocessed_pseudogene"; transcript_status "KNOWN"; transcript_name "MTND2P8-001"; exon_number 1; exon_id "ENSE00001746548.1"; level 2; transcript_support_level "NA"; ont "PGO:0000005"; tag "basic"; havana_gene "OTTHUMG00000020067.1"; havan…
chr9	80565031	80565962	ENSG00000225901.1	.	-	HAVANA	exon	.	gene_id "ENSG00000225901.1"; transcript_id "ENST00000422293.1"; gene_type "unprocessed_pseudogene"; gene_status "KNOWN"; gene_name "MTND2P9"; transcript_type "unprocessed_pseudogene"; transcript_status "KNOWN"; transcript_name "MTND2P9-001"; exon_number 1; exon_id "ENSE00001721974.1"; level 2; transcript_support_level "NA"; ont "PGO:0000005"; tag "basic"; havana_gene "OTTHUMG00000020077.1"; havan…
chr9	92110167	92110514	ENSG00000238288.1	.	+	HAVANA	exon	.	gene_id "ENSG00000238288.1"; transcript_id "ENST00000431980.1"; gene_type "unprocessed_pseudogene"; gene_status "KNOWN"; gene_name "MTND3P23"; transcript_type "unprocessed_pseudogene"; transcript_status "KNOWN"; transcript_name "MTND3P23-001"; exon_number 1; exon_id "ENSE00001681349.1"; level 2; transcript_support_level "NA"; ont "PGO:0000005"; tag "basic"; havana_gene "OTTHUMG00000021038.1"; hav…
chr9	92110574	92110868	ENSG00000240791.1	.	+	HAVANA	exon	.	gene_id "ENSG00000240791.1"; transcript_id "ENST00000431728.1"; gene_type "unprocessed_pseudogene"; gene_status "KNOWN"; gene_name "MTND4LP7"; transcript_type "unprocessed_pseudogene"; transcript_status "KNOWN"; transcript_name "MTND4LP7-001"; exon_number 1; exon_id "ENSE00001639007.1"; level 2; transcript_support_level "NA"; ont "PGO:0000005"; tag "basic"; havana_gene "OTTHUMG00000020217.1"; hav…
chr9	92110864	92111897	ENSG00000227321.2	.	+	HAVANA	exon	.	gene_id "ENSG00000227321.2"; transcript_id "ENST00000437913.1"; gene_type "unprocessed_pseudogene"; gene_status "KNOWN"; gene_name "MTND4P15"; transcript_type "unprocessed_pseudogene"; transcript_status "KNOWN"; transcript_name "MTND4P15-001"; exon_number 1; exon_id "ENSE00001754933.1"; level 1; transcript_support_level "NA"; ont "PGO:0000005"; tag "pseudo_consens"; tag "basic"; havana_gene "OTTH…
chr9	101793453	101793756	ENSG00000230302.2	.	-	HAVANA	exon	.	gene_id "ENSG00000230302.2"; transcript_id "ENST00000453537.2"; gene_type "processed_pseudogene"; gene_status "KNOWN"; gene_name "MTND3P4"; transcript_type "processed_pseudogene"; transcript_status "KNOWN"; transcript_name "MTND3P4-001"; exon_number 1; exon_id "ENSE00001619291.2"; level 2; transcript_support_level "NA"; ont "PGO:0000004"; tag "basic"; havana_gene "OTTHUMG00000020389.2"; havana_tr…
chr9	109300185	109300487	ENSG00000237124.1	.	+	HAVANA	exon	.	gene_id "ENSG00000237124.1"; transcript_id "ENST00000423638.1"; gene_type "unprocessed_pseudogene"; gene_status "KNOWN"; gene_name "MTND2P11"; transcript_type "unprocessed_pseudogene"; transcript_status "KNOWN"; transcript_name "MTND2P11-001"; exon_number 1; exon_id "ENSE00001760768.1"; level 2; transcript_support_level "NA"; ont "PGO:0000005"; tag "basic"; havana_gene "OTTHUMG00000020471.1"; hav…
chr9	109300826	109301172	ENSG00000237124.1	.	+	HAVANA	exon	.	gene_id "ENSG00000237124.1"; transcript_id "ENST00000423638.1"; gene_type "unprocessed_pseudogene"; gene_status "KNOWN"; gene_name "MTND2P11"; transcript_type "unprocessed_pseudogene"; transcript_status "KNOWN"; transcript_name "MTND2P11-001"; exon_number 2; exon_id "ENSE00001613869.1"; level 2; transcript_support_level "NA"; ont "PGO:0000005"; tag "basic"; havana_gene "OTTHUMG00000020471.1"; hav…
chr10	19747822	19748621	ENSG00000230818.1	.	+	HAVANA	exon	.	gene_id "ENSG00000230818.1"; transcript_id "ENST00000419987.1"; gene_type "processed_pseudogene"; gene_status "KNOWN"; gene_name "MTND2P16"; transcript_type "processed_pseudogene"; transcript_status "KNOWN"; transcript_name "MTND2P16-001"; exon_number 1; exon_id "ENSE00001697681.1"; level 2; transcript_support_level "NA"; ont "PGO:0000004"; tag "basic"; havana_gene "OTTHUMG00000017778.1"; havana_…
chr10	20804292	20804577	ENSG00000235940.1	.	+	HAVANA	exon	.	gene_id "ENSG00000235940.1"; transcript_id "ENST00000412991.1"; gene_type "processed_pseudogene"; gene_status "KNOWN"; gene_name "MTND1P21"; transcript_type "processed_pseudogene"; transcript_status "KNOWN"; transcript_name "MTND1P21-001"; exon_number 1; exon_id "ENSE00001771924.1"; level 2; transcript_support_level "NA"; ont "PGO:0000004"; tag "basic"; havana_gene "OTTHUMG00000017784.1"; havana_…
chr10	33023367	33023647	ENSG00000234163.1	.	-	HAVANA	exon	.	gene_id "ENSG00000234163.1"; transcript_id "ENST00000422184.1"; gene_type "processed_pseudogene"; gene_status "KNOWN"; gene_name "MTND4LP11"; transcript_type "processed_pseudogene"; transcript_status "KNOWN"; transcript_name "MTND4LP11-001"; exon_number 1; exon_id "ENSE00001721130.1"; level 2; transcript_support_level "NA"; ont "PGO:0000004"; tag "basic"; havana_gene "OTTHUMG00000017932.1"; havan…
chr10	36432881	36434484	ENSG00000236626.1	.	-	HAVANA	exon	.	gene_id "ENSG00000236626.1"; transcript_id "ENST00000418405.1"; gene_type "processed_pseudogene"; gene_status "KNOWN"; gene_name "MTND5P17"; transcript_type "processed_pseudogene"; transcript_status "KNOWN"; transcript_name "MTND5P17-001"; exon_number 1; exon_id "ENSE00001784692.1"; level 2; transcript_support_level "NA"; ont "PGO:0000004"; tag "basic"; havana_gene "OTTHUMG00000017961.1"; havana_…
chr10	36434709	36435174	ENSG00000228694.1	.	-	HAVANA	exon	.	gene_id "ENSG00000228694.1"; transcript_id "ENST00000447010.1"; gene_type "processed_pseudogene"; gene_status "KNOWN"; gene_name "MTND4P18"; transcript_type "processed_pseudogene"; transcript_status "KNOWN"; transcript_name "MTND4P18-001"; exon_number 1; exon_id "ENSE00001792007.1"; level 2; transcript_support_level "NA"; ont "PGO:0000004"; tag "basic"; havana_gene "OTTHUMG00000017962.1"; havana_…
chr10	37600795	37601368	ENSG00000225276.1	.	-	HAVANA	exon	.	gene_id "ENSG00000225276.1"; transcript_id "ENST00000448191.1"; gene_type "processed_pseudogene"; gene_status "KNOWN"; gene_name "MTND1P18"; transcript_type "processed_pseudogene"; transcript_status "KNOWN"; transcript_name "MTND1P18-001"; exon_number 1; exon_id "ENSE00001597087.1"; level 2; transcript_support_level "NA"; ont "PGO:0000004"; tag "basic"; havana_gene "OTTHUMG00000017975.1"; havana_…
chr10	69594040	69594932	ENSG00000231152.1	.	-	HAVANA	exon	.	gene_id "ENSG00000231152.1"; transcript_id "ENST00000418575.1"; gene_type "processed_pseudogene"; gene_status "KNOWN"; gene_name "MTND2P15"; transcript_type "processed_pseudogene"; transcript_status "KNOWN"; transcript_name "MTND2P15-001"; exon_number 1; exon_id "ENSE00001608903.1"; level 2; transcript_support_level "NA"; ont "PGO:0000004"; tag "basic"; havana_gene "OTTHUMG00000018386.1"; havana_…
chr10	69595486	69596436	ENSG00000226794.1	.	-	HAVANA	exon	.	gene_id "ENSG00000226794.1"; transcript_id "ENST00000430341.1"; gene_type "processed_pseudogene"; gene_status "KNOWN"; gene_name "MTND1P20"; transcript_type "processed_pseudogene"; transcript_status "KNOWN"; transcript_name "MTND1P20-001"; exon_number 1; exon_id "ENSE00001759078.1"; level 2; transcript_support_level "NA"; ont "PGO:0000004"; tag "basic"; havana_gene "OTTHUMG00000018385.1"; havana_…
chr10	94774155	94774633	ENSG00000230338.1	.	-	HAVANA	exon	.	gene_id "ENSG00000230338.1"; transcript_id "ENST00000446659.1"; gene_type "processed_pseudogene"; gene_status "KNOWN"; gene_name "MTND4P19"; transcript_type "processed_pseudogene"; transcript_status "KNOWN"; transcript_name "MTND4P19-001"; exon_number 1; exon_id "ENSE00001690025.1"; level 2; transcript_support_level "NA"; ont "PGO:0000004"; tag "basic"; havana_gene "OTTHUMG00000018795.1"; havana_…
chr10	94940252	94941121	ENSG00000233377.1	.	-	HAVANA	exon	.	gene_id "ENSG00000233377.1"; transcript_id "ENST00000424125.1"; gene_type "processed_pseudogene"; gene_status "KNOWN"; gene_name "MTND4P20"; transcript_type "processed_pseudogene"; transcript_status "KNOWN"; transcript_name "MTND4P20-001"; exon_number 1; exon_id "ENSE00001635926.1"; level 2; transcript_support_level "NA"; ont "PGO:0000004"; tag "basic"; havana_gene "OTTHUMG00000018801.2"; havana_…
chr11	11239758	11240280	ENSG00000255123.1	.	+	HAVANA	exon	.	gene_id "ENSG00000255123.1"; transcript_id "ENST00000531961.1"; gene_type "processed_pseudogene"; gene_status "KNOWN"; gene_name "MTND5P21"; transcript_type "processed_pseudogene"; transcript_status "KNOWN"; transcript_name "MTND5P21-001"; exon_number 1; exon_id "ENSE00002167882.1"; level 2; transcript_support_level "NA"; ont "PGO:0000004"; tag "basic"; havana_gene "OTTHUMG00000165725.1"; havana_…
chr11	81552225	81552516	ENSG00000254747.1	.	+	HAVANA	exon	.	gene_id "ENSG00000254747.1"; transcript_id "ENST00000526864.1"; gene_type "processed_pseudogene"; gene_status "KNOWN"; gene_name "MTND4LP18"; transcript_type "processed_pseudogene"; transcript_status "KNOWN"; transcript_name "MTND4LP18-001"; exon_number 1; exon_id "ENSE00002177856.1"; level 2; transcript_support_level "NA"; ont "PGO:0000004"; tag "basic"; havana_gene "OTTHUMG00000166827.1"; havan…
chr11	81555909	81556425	ENSG00000255316.1	.	-	HAVANA	exon	.	gene_id "ENSG00000255316.1"; transcript_id "ENST00000528711.1"; gene_type "unprocessed_pseudogene"; gene_status "KNOWN"; gene_name "MTND6P25"; transcript_type "unprocessed_pseudogene"; transcript_status "KNOWN"; transcript_name "MTND6P25-001"; exon_number 1; exon_id "ENSE00002183333.1"; level 2; transcript_support_level "NA"; ont "PGO:0000005"; tag "basic"; havana_gene "OTTHUMG00000166828.1"; hav…
chr11	89908539	89909047	ENSG00000255055.1	.	+	HAVANA	exon	.	gene_id "ENSG00000255055.1"; transcript_id "ENST00000526739.1"; gene_type "processed_pseudogene"; gene_status "KNOWN"; gene_name "MTND1P35"; transcript_type "processed_pseudogene"; transcript_status "KNOWN"; transcript_name "MTND1P35-001"; exon_number 1; exon_id "ENSE00002199667.1"; level 2; transcript_support_level "NA"; ont "PGO:0000004"; tag "basic"; havana_gene "OTTHUMG00000167642.1"; havana_…
chr11	103406212	103407241	ENSG00000254565.1	.	-	HAVANA	exon	.	gene_id "ENSG00000254565.1"; transcript_id "ENST00000528255.1"; gene_type "processed_pseudogene"; gene_status "KNOWN"; gene_name "MTND2P26"; transcript_type "processed_pseudogene"; transcript_status "KNOWN"; transcript_name "MTND2P26-001"; exon_number 1; exon_id "ENSE00002148465.1"; level 2; transcript_support_level "NA"; ont "PGO:0000004"; tag "basic"; havana_gene "OTTHUMG00000165947.1"; havana_…
chr11	103407440	103408376	ENSG00000253245.2	.	-	HAVANA	exon	.	gene_id "ENSG00000253245.2"; transcript_id "ENST00000522384.2"; gene_type "processed_pseudogene"; gene_status "KNOWN"; gene_name "MTND1P36"; transcript_type "processed_pseudogene"; transcript_status "KNOWN"; transcript_name "MTND1P36-001"; exon_number 1; exon_id "ENSE00002116136.2"; level 2; transcript_support_level "NA"; ont "PGO:0000004"; tag "basic"; havana_gene "OTTHUMG00000165948.1"; havana_…
chr12	41698494	41699182	ENSG00000258239.1	.	-	HAVANA	exon	.	gene_id "ENSG00000258239.1"; transcript_id "ENST00000550281.1"; gene_type "unprocessed_pseudogene"; gene_status "KNOWN"; gene_name "MTND2P17"; transcript_type "unprocessed_pseudogene"; transcript_status "KNOWN"; transcript_name "MTND2P17-001"; exon_number 1; exon_id "ENSE00002344232.1"; level 2; transcript_support_level "NA"; ont "PGO:0000005"; tag "basic"; havana_gene "OTTHUMG00000169366.1"; hav…
chr12	41699390	41700251	ENSG00000257858.1	.	-	HAVANA	exon	.	gene_id "ENSG00000257858.1"; transcript_id "ENST00000552175.1"; gene_type "unprocessed_pseudogene"; gene_status "KNOWN"; gene_name "MTND1P24"; transcript_type "unprocessed_pseudogene"; transcript_status "KNOWN"; transcript_name "MTND1P24-001"; exon_number 1; exon_id "ENSE00002343594.1"; level 2; transcript_support_level "NA"; ont "PGO:0000005"; tag "basic"; havana_gene "OTTHUMG00000169367.1"; hav…
chr13	22113118	22113338	ENSG00000226118.1	.	-	HAVANA	exon	.	gene_id "ENSG00000226118.1"; transcript_id "ENST00000441336.1"; gene_type "processed_pseudogene"; gene_status "KNOWN"; gene_name "MTND3P1"; transcript_type "processed_pseudogene"; transcript_status "KNOWN"; transcript_name "MTND3P1-001"; exon_number 1; exon_id "ENSE00001713663.1"; level 2; transcript_support_level "NA"; ont "PGO:0000004"; tag "basic"; havana_gene "OTTHUMG00000016548.1"; havana_tr…
chr13	84520102	84521568	ENSG00000228597.1	.	+	HAVANA	exon	.	gene_id "ENSG00000228597.1"; transcript_id "ENST00000457501.1"; gene_type "processed_pseudogene"; gene_status "KNOWN"; gene_name "MTND4P1"; transcript_type "processed_pseudogene"; transcript_status "KNOWN"; transcript_name "MTND4P1-001"; exon_number 1; exon_id "ENSE00001741872.1"; level 2; transcript_support_level "NA"; ont "PGO:0000004"; tag "basic"; havana_gene "OTTHUMG00000017153.1"; havana_tr…
chr13	84521724	84522165	ENSG00000232447.1	.	+	HAVANA	exon	.	gene_id "ENSG00000232447.1"; transcript_id "ENST00000438536.1"; gene_type "processed_pseudogene"; gene_status "KNOWN"; gene_name "MTND5P3"; transcript_type "processed_pseudogene"; transcript_status "KNOWN"; transcript_name "MTND5P3-001"; exon_number 1; exon_id "ENSE00001753848.1"; level 2; transcript_support_level "NA"; ont "PGO:0000004"; tag "basic"; havana_gene "OTTHUMG00000017152.1"; havana_tr…
chr13	84522556	84523915	ENSG00000232447.1	.	+	HAVANA	exon	.	gene_id "ENSG00000232447.1"; transcript_id "ENST00000438536.1"; gene_type "processed_pseudogene"; gene_status "KNOWN"; gene_name "MTND5P3"; transcript_type "processed_pseudogene"; transcript_status "KNOWN"; transcript_name "MTND5P3-001"; exon_number 2; exon_id "ENSE00001628398.1"; level 2; transcript_support_level "NA"; ont "PGO:0000004"; tag "basic"; havana_gene "OTTHUMG00000017152.1"; havana_tr…
chr13	95692537	95692826	ENSG00000229622.1	.	+	HAVANA	exon	.	gene_id "ENSG00000229622.1"; transcript_id "ENST00000442927.1"; gene_type "processed_pseudogene"; gene_status "KNOWN"; gene_name "MTND5P2"; transcript_type "processed_pseudogene"; transcript_status "KNOWN"; transcript_name "MTND5P2-001"; exon_number 1; exon_id "ENSE00001664391.1"; level 2; transcript_support_level "NA"; ont "PGO:0000004"; tag "basic"; havana_gene "OTTHUMG00000017222.1"; havana_tr…
chr13	95693119	95693972	ENSG00000229622.1	.	+	HAVANA	exon	.	gene_id "ENSG00000229622.1"; transcript_id "ENST00000442927.1"; gene_type "processed_pseudogene"; gene_status "KNOWN"; gene_name "MTND5P2"; transcript_type "processed_pseudogene"; transcript_status "KNOWN"; transcript_name "MTND5P2-001"; exon_number 2; exon_id "ENSE00001687241.1"; level 2; transcript_support_level "NA"; ont "PGO:0000004"; tag "basic"; havana_gene "OTTHUMG00000017222.1"; havana_tr…
chr13	95693982	95694495	ENSG00000227714.1	.	-	HAVANA	exon	.	gene_id "ENSG00000227714.1"; transcript_id "ENST00000439477.1"; gene_type "processed_pseudogene"; gene_status "KNOWN"; gene_name "MTND6P18"; transcript_type "processed_pseudogene"; transcript_status "KNOWN"; transcript_name "MTND6P18-001"; exon_number 1; exon_id "ENSE00001744964.1"; level 2; transcript_support_level "NA"; ont "PGO:0000004"; tag "basic"; havana_gene "OTTHUMG00000017223.1"; havana_…
chr14	84172840	84173606	ENSG00000258762.1	.	+	HAVANA	exon	.	gene_id "ENSG00000258762.1"; transcript_id "ENST00000556706.1"; gene_type "processed_pseudogene"; gene_status "KNOWN"; gene_name "MTND4P33"; transcript_type "processed_pseudogene"; transcript_status "KNOWN"; transcript_name "MTND4P33-001"; exon_number 1; exon_id "ENSE00002463754.1"; level 2; transcript_support_level "NA"; ont "PGO:0000004"; tag "basic"; havana_gene "OTTHUMG00000171375.1"; havana_…
chr14	84173790	84175510	ENSG00000258923.2	.	+	HAVANA	exon	.	gene_id "ENSG00000258923.2"; transcript_id "ENST00000557537.2"; gene_type "processed_pseudogene"; gene_status "KNOWN"; gene_name "MTND5P35"; transcript_type "processed_pseudogene"; transcript_status "KNOWN"; transcript_name "MTND5P35-001"; exon_number 1; exon_id "ENSE00002452774.2"; level 2; transcript_support_level "NA"; ont "PGO:0000004"; tag "basic"; havana_gene "OTTHUMG00000171376.2"; havana_…
chr15	46341353	46341599	ENSG00000259593.1	.	+	HAVANA	exon	.	gene_id "ENSG00000259593.1"; transcript_id "ENST00000559945.1"; gene_type "processed_pseudogene"; gene_status "KNOWN"; gene_name "MTND5P40"; transcript_type "processed_pseudogene"; transcript_status "KNOWN"; transcript_name "MTND5P40-001"; exon_number 1; exon_id "ENSE00002550703.1"; level 2; transcript_support_level "NA"; ont "PGO:0000004"; tag "basic"; havana_gene "OTTHUMG00000172031.1"; havana_…
chr15	58150634	58150962	ENSG00000259626.2	.	+	HAVANA	exon	.	gene_id "ENSG00000259626.2"; transcript_id "ENST00000559068.2"; gene_type "processed_pseudogene"; gene_status "KNOWN"; gene_name "MTND3P12"; transcript_type "processed_pseudogene"; transcript_status "KNOWN"; transcript_name "MTND3P12-001"; exon_number 1; exon_id "ENSE00002560519.2"; level 2; transcript_support_level "NA"; ont "PGO:0000004"; tag "basic"; havana_gene "OTTHUMG00000171995.2"; havana_…
chr15	58152605	58154407	ENSG00000259379.1	.	+	HAVANA	exon	.	gene_id "ENSG00000259379.1"; transcript_id "ENST00000560711.1"; gene_type "processed_pseudogene"; gene_status "KNOWN"; gene_name "MTND5P32"; transcript_type "processed_pseudogene"; transcript_status "KNOWN"; transcript_name "MTND5P32-001"; exon_number 1; exon_id "ENSE00002553746.1"; level 2; transcript_support_level "NA"; ont "PGO:0000004"; tag "basic"; havana_gene "OTTHUMG00000171998.1"; havana_…
chr16	3369956	3370906	ENSG00000263177.1	.	-	HAVANA	exon	.	gene_id "ENSG00000263177.1"; transcript_id "ENST00000571424.1"; gene_type "processed_pseudogene"; gene_status "KNOWN"; gene_name "MTND1P8"; transcript_type "processed_pseudogene"; transcript_status "KNOWN"; transcript_name "MTND1P8-001"; exon_number 1; exon_id "ENSE00002659531.1"; level 2; transcript_support_level "NA"; ont "PGO:0000004"; tag "basic"; havana_gene "OTTHUMG00000177598.1"; havana_tr…
chr16	10719832	10720015	ENSG00000262107.1	.	+	HAVANA	exon	.	gene_id "ENSG00000262107.1"; transcript_id "ENST00000571794.1"; gene_type "unprocessed_pseudogene"; gene_status "KNOWN"; gene_name "MTND6P33"; transcript_type "unprocessed_pseudogene"; transcript_status "KNOWN"; transcript_name "MTND6P33-001"; exon_number 1; exon_id "ENSE00002664885.1"; level 2; transcript_support_level "NA"; ont "PGO:0000005"; tag "basic"; havana_gene "OTTHUMG00000177345.1"; hav…
chr16	10720014	10721464	ENSG00000261904.1	.	-	HAVANA	exon	.	gene_id "ENSG00000261904.1"; transcript_id "ENST00000571250.1"; gene_type "unprocessed_pseudogene"; gene_status "KNOWN"; gene_name "MTND5P33"; transcript_type "unprocessed_pseudogene"; transcript_status "KNOWN"; transcript_name "MTND5P33-001"; exon_number 1; exon_id "ENSE00002636669.1"; level 2; transcript_support_level "NA"; ont "PGO:0000005"; tag "basic"; havana_gene "OTTHUMG00000177346.1"; hav…
chr16	10721697	10723068	ENSG00000262322.1	.	-	HAVANA	exon	.	gene_id "ENSG00000262322.1"; transcript_id "ENST00000572715.1"; gene_type "unprocessed_pseudogene"; gene_status "KNOWN"; gene_name "MTND4P34"; transcript_type "unprocessed_pseudogene"; transcript_status "KNOWN"; transcript_name "MTND4P34-001"; exon_number 1; exon_id "ENSE00002670868.1"; level 2; transcript_support_level "NA"; ont "PGO:0000005"; tag "basic"; havana_gene "OTTHUMG00000177347.1"; hav…
chr16	10723064	10723355	ENSG00000262259.1	.	-	HAVANA	exon	.	gene_id "ENSG00000262259.1"; transcript_id "ENST00000572277.1"; gene_type "unprocessed_pseudogene"; gene_status "KNOWN"; gene_name "MTND4LP24"; transcript_type "unprocessed_pseudogene"; transcript_status "KNOWN"; transcript_name "MTND4LP24-001"; exon_number 1; exon_id "ENSE00002634298.1"; level 2; transcript_support_level "NA"; ont "PGO:0000005"; tag "basic"; havana_gene "OTTHUMG00000177348.1"; h…
chr16	10723423	10723766	ENSG00000263196.1	.	-	HAVANA	exon	.	gene_id "ENSG00000263196.1"; transcript_id "ENST00000574391.1"; gene_type "unprocessed_pseudogene"; gene_status "KNOWN"; gene_name "MTND3P13"; transcript_type "unprocessed_pseudogene"; transcript_status "KNOWN"; transcript_name "MTND3P13-001"; exon_number 1; exon_id "ENSE00002682643.1"; level 2; transcript_support_level "NA"; ont "PGO:0000005"; tag "basic"; havana_gene "OTTHUMG00000177349.1"; hav…
chr16	49066566	49066729	ENSG00000260067.1	.	-	HAVANA	exon	.	gene_id "ENSG00000260067.1"; transcript_id "ENST00000570218.1"; gene_type "processed_pseudogene"; gene_status "KNOWN"; gene_name "MTND4LP25"; transcript_type "processed_pseudogene"; transcript_status "KNOWN"; transcript_name "MTND4LP25-001"; exon_number 1; exon_id "ENSE00002595192.1"; level 2; transcript_support_level "NA"; ont "PGO:0000004"; tag "basic"; havana_gene "OTTHUMG00000176681.1"; havan…
chr16	55007981	55008306	ENSG00000260147.1	.	+	HAVANA	exon	.	gene_id "ENSG00000260147.1"; transcript_id "ENST00000568888.1"; gene_type "processed_pseudogene"; gene_status "KNOWN"; gene_name "MTND5P34"; transcript_type "processed_pseudogene"; transcript_status "KNOWN"; transcript_name "MTND5P34-001"; exon_number 1; exon_id "ENSE00002597592.1"; level 2; transcript_support_level "NA"; ont "PGO:0000004"; tag "basic"; havana_gene "OTTHUMG00000173134.1"; havana_…
chr17	19602258	19603208	ENSG00000227225.1	.	+	HAVANA	exon	.	gene_id "ENSG00000227225.1"; transcript_id "ENST00000427400.1"; gene_type "unprocessed_pseudogene"; gene_status "KNOWN"; gene_name "MTND1P14"; transcript_type "unprocessed_pseudogene"; transcript_status "KNOWN"; transcript_name "MTND1P14-001"; exon_number 1; exon_id "ENSE00001641260.1"; level 2; transcript_support_level "NA"; ont "PGO:0000005"; tag "basic"; havana_gene "OTTHUMG00000059467.1"; hav…
chr17	19603796	19605048	ENSG00000228725.3	.	+	HAVANA	exon	.	gene_id "ENSG00000228725.3"; transcript_id "ENST00000417560.3"; gene_type "unprocessed_pseudogene"; gene_status "KNOWN"; gene_name "MTND2P12"; transcript_type "unprocessed_pseudogene"; transcript_status "KNOWN"; transcript_name "MTND2P12-001"; exon_number 1; exon_id "ENSE00001604281.3"; level 2; transcript_support_level "NA"; ont "PGO:0000005"; tag "basic"; havana_gene "OTTHUMG00000059468.3"; hav…
chr17	22524737	22525686	ENSG00000264168.1	.	+	HAVANA	exon	.	gene_id "ENSG00000264168.1"; transcript_id "ENST00000579262.1"; gene_type "transcribed_processed_pseudogene"; gene_status "KNOWN"; gene_name "MTND1P15"; transcript_type "transcribed_processed_pseudogene"; transcript_status "KNOWN"; transcript_name "MTND1P15-001"; exon_number 1; exon_id "ENSE00002690607.1"; level 2; transcript_support_level "NA"; ont "PGO:0000004"; ont "PGO:0000019"; tag "basic"; …
chr17	22524748	22525696	ENSG00000264168.1	.	+	HAVANA	exon	.	gene_id "ENSG00000264168.1"; transcript_id "ENST00000579693.1"; gene_type "transcribed_processed_pseudogene"; gene_status "KNOWN"; gene_name "MTND1P15"; transcript_type "processed_transcript"; transcript_status "KNOWN"; transcript_name "MTND1P15-002"; exon_number 1; exon_id "ENSE00002714292.1"; level 2; transcript_support_level "NA"; tag "basic"; havana_gene "OTTHUMG00000179069.3"; havana_transcr…
chr17	22525898	22526937	ENSG00000263914.1	.	+	HAVANA	exon	.	gene_id "ENSG00000263914.1"; transcript_id "ENST00000577438.1"; gene_type "unprocessed_pseudogene"; gene_status "KNOWN"; gene_name "MTND2P13"; transcript_type "unprocessed_pseudogene"; transcript_status "KNOWN"; transcript_name "MTND2P13-001"; exon_number 1; exon_id "ENSE00002732613.1"; level 2; transcript_support_level "NA"; ont "PGO:0000005"; tag "basic"; havana_gene "OTTHUMG00000179070.1"; hav…
chr19	12502674	12502816	ENSG00000236483.1	.	+	HAVANA	exon	.	gene_id "ENSG00000236483.1"; transcript_id "ENST00000436718.1"; gene_type "unprocessed_pseudogene"; gene_status "KNOWN"; gene_name "MTND2P40"; transcript_type "unprocessed_pseudogene"; transcript_status "KNOWN"; transcript_name "MTND2P40-001"; exon_number 1; exon_id "ENSE00001656273.1"; level 2; transcript_support_level "NA"; ont "PGO:0000005"; tag "basic"; havana_gene "OTTHUMG00000156417.1"; hav…
chr19	12503139	12503755	ENSG00000236483.1	.	+	HAVANA	exon	.	gene_id "ENSG00000236483.1"; transcript_id "ENST00000436718.1"; gene_type "unprocessed_pseudogene"; gene_status "KNOWN"; gene_name "MTND2P40"; transcript_type "unprocessed_pseudogene"; transcript_status "KNOWN"; transcript_name "MTND2P40-001"; exon_number 2; exon_id "ENSE00001722243.1"; level 2; transcript_support_level "NA"; ont "PGO:0000005"; tag "basic"; havana_gene "OTTHUMG00000156417.1"; hav…
chr19	12504023	12504106	ENSG00000236483.1	.	+	HAVANA	exon	.	gene_id "ENSG00000236483.1"; transcript_id "ENST00000436718.1"; gene_type "unprocessed_pseudogene"; gene_status "KNOWN"; gene_name "MTND2P40"; transcript_type "unprocessed_pseudogene"; transcript_status "KNOWN"; transcript_name "MTND2P40-001"; exon_number 3; exon_id "ENSE00001630259.1"; level 2; transcript_support_level "NA"; ont "PGO:0000005"; tag "basic"; havana_gene "OTTHUMG00000156417.1"; hav…
chr20	57357425	57358369	ENSG00000228995.1	.	-	HAVANA	exon	.	gene_id "ENSG00000228995.1"; transcript_id "ENST00000453775.1"; gene_type "processed_pseudogene"; gene_status "KNOWN"; gene_name "MTND1P9"; transcript_type "processed_pseudogene"; transcript_status "KNOWN"; transcript_name "MTND1P9-001"; exon_number 1; exon_id "ENSE00001748278.1"; level 2; transcript_support_level "NA"; ont "PGO:0000004"; tag "basic"; havana_gene "OTTHUMG00000032816.1"; havana_tr…
chr21	44472894	44473247	ENSG00000223431.1	.	+	HAVANA	exon	.	gene_id "ENSG00000223431.1"; transcript_id "ENST00000443620.1"; gene_type "processed_pseudogene"; gene_status "KNOWN"; gene_name "MTND6P21"; transcript_type "processed_pseudogene"; transcript_status "KNOWN"; transcript_name "MTND6P21-001"; exon_number 1; exon_id "ENSE00001696870.1"; level 2; transcript_support_level "NA"; ont "PGO:0000004"; tag "basic"; havana_gene "OTTHUMG00000040843.1"; havana_…
chr21	44473610	44473739	ENSG00000223431.1	.	+	HAVANA	exon	.	gene_id "ENSG00000223431.1"; transcript_id "ENST00000443620.1"; gene_type "processed_pseudogene"; gene_status "KNOWN"; gene_name "MTND6P21"; transcript_type "processed_pseudogene"; transcript_status "KNOWN"; transcript_name "MTND6P21-001"; exon_number 2; exon_id "ENSE00001732080.1"; level 2; transcript_support_level "NA"; ont "PGO:0000004"; tag "basic"; havana_gene "OTTHUMG00000040843.1"; havana_…
chr21	44473722	44475097	ENSG00000227999.1	.	-	HAVANA	exon	.	gene_id "ENSG00000227999.1"; transcript_id "ENST00000445440.1"; gene_type "processed_pseudogene"; gene_status "KNOWN"; gene_name "MTND5P1"; transcript_type "processed_pseudogene"; transcript_status "KNOWN"; transcript_name "MTND5P1-001"; exon_number 1; exon_id "ENSE00001616067.1"; level 2; transcript_support_level "NA"; ont "PGO:0000004"; tag "basic"; havana_gene "OTTHUMG00000040844.2"; havana_tr…
chr22	16876217	16876421	ENSG00000228122.1	.	-	HAVANA	exon	.	gene_id "ENSG00000228122.1"; transcript_id "ENST00000448961.1"; gene_type "processed_pseudogene"; gene_status "KNOWN"; gene_name "MTND1P17"; transcript_type "processed_pseudogene"; transcript_status "KNOWN"; transcript_name "MTND1P17-001"; exon_number 1; exon_id "ENSE00001782881.1"; level 2; transcript_support_level "NA"; ont "PGO:0000004"; tag "basic"; havana_gene "OTTHUMG00000147347.1"; havana_…
chr22	36178553	36179385	ENSG00000229088.1	.	+	HAVANA	exon	.	gene_id "ENSG00000229088.1"; transcript_id "ENST00000426108.1"; gene_type "processed_pseudogene"; gene_status "KNOWN"; gene_name "MTND1P10"; transcript_type "processed_pseudogene"; transcript_status "KNOWN"; transcript_name "MTND1P10-001"; exon_number 1; exon_id "ENSE00001713287.1"; level 2; transcript_support_level "NA"; ont "PGO:0000004"; tag "basic"; havana_gene "OTTHUMG00000150637.1"; havana_…
chrX	5168917	5169439	ENSG00000235039.1	.	-	HAVANA	exon	.	gene_id "ENSG00000235039.1"; transcript_id "ENST00000428247.1"; gene_type "processed_pseudogene"; gene_status "KNOWN"; gene_name "MTND6P12"; transcript_type "processed_pseudogene"; transcript_status "KNOWN"; transcript_name "MTND6P12-001"; exon_number 1; exon_id "ENSE00001724156.1"; level 2; transcript_support_level "NA"; ont "PGO:0000004"; tag "basic"; havana_gene "OTTHUMG00000021089.1"; havana_…
chrX	55179193	55179999	ENSG00000231947.1	.	-	HAVANA	exon	.	gene_id "ENSG00000231947.1"; transcript_id "ENST00000453434.1"; gene_type "processed_pseudogene"; gene_status "KNOWN"; gene_name "MTND2P24"; transcript_type "processed_pseudogene"; transcript_status "KNOWN"; transcript_name "MTND2P24-001"; exon_number 1; exon_id "ENSE00001600915.1"; level 2; transcript_support_level "NA"; ont "PGO:0000004"; tag "basic"; havana_gene "OTTHUMG00000021653.1"; havana_…
chrX	55180376	55181277	ENSG00000238047.1	.	-	HAVANA	exon	.	gene_id "ENSG00000238047.1"; transcript_id "ENST00000441241.1"; gene_type "processed_pseudogene"; gene_status "KNOWN"; gene_name "MTND1P30"; transcript_type "processed_pseudogene"; transcript_status "KNOWN"; transcript_name "MTND1P30-001"; exon_number 1; exon_id "ENSE00001708225.1"; level 2; transcript_support_level "NA"; ont "PGO:0000004"; tag "basic"; havana_gene "OTTHUMG00000021652.1"; havana_…
chrX	62842541	62843502	ENSG00000235170.1	.	+	HAVANA	exon	.	gene_id "ENSG00000235170.1"; transcript_id "ENST00000449206.1"; gene_type "processed_pseudogene"; gene_status "KNOWN"; gene_name "MTND1P31"; transcript_type "processed_pseudogene"; transcript_status "KNOWN"; transcript_name "MTND1P31-001"; exon_number 1; exon_id "ENSE00001785125.1"; level 2; transcript_support_level "NA"; ont "PGO:0000004"; tag "basic"; havana_gene "OTTHUMG00000021692.1"; havana_…
chrX	62843696	62844306	ENSG00000228182.1	.	+	HAVANA	exon	.	gene_id "ENSG00000228182.1"; transcript_id "ENST00000449028.1"; gene_type "processed_pseudogene"; gene_status "KNOWN"; gene_name "MTND2P25"; transcript_type "processed_pseudogene"; transcript_status "KNOWN"; transcript_name "MTND2P25-001"; exon_number 1; exon_id "ENSE00001609998.1"; level 2; transcript_support_level "NA"; ont "PGO:0000004"; tag "basic"; havana_gene "OTTHUMG00000021693.1"; havana_…
chrX	70128939	70129071	ENSG00000235382.1	.	-	HAVANA	exon	.	gene_id "ENSG00000235382.1"; transcript_id "ENST00000425607.1"; gene_type "processed_pseudogene"; gene_status "KNOWN"; gene_name "MTND4P31"; transcript_type "processed_pseudogene"; transcript_status "KNOWN"; transcript_name "MTND4P31-001"; exon_number 1; exon_id "ENSE00001618661.1"; level 2; transcript_support_level "NA"; ont "PGO:0000004"; tag "basic"; havana_gene "OTTHUMG00000021760.1"; havana_…
chrX	70127127	70127362	ENSG00000235382.1	.	-	HAVANA	exon	.	gene_id "ENSG00000235382.1"; transcript_id "ENST00000425607.1"; gene_type "processed_pseudogene"; gene_status "KNOWN"; gene_name "MTND4P31"; transcript_type "processed_pseudogene"; transcript_status "KNOWN"; transcript_name "MTND4P31-001"; exon_number 2; exon_id "ENSE00001769990.1"; level 2; transcript_support_level "NA"; ont "PGO:0000004"; tag "basic"; havana_gene "OTTHUMG00000021760.1"; havana_…
chrX	70126053	70126804	ENSG00000235382.1	.	-	HAVANA	exon	.	gene_id "ENSG00000235382.1"; transcript_id "ENST00000425607.1"; gene_type "processed_pseudogene"; gene_status "KNOWN"; gene_name "MTND4P31"; transcript_type "processed_pseudogene"; transcript_status "KNOWN"; transcript_name "MTND4P31-001"; exon_number 3; exon_id "ENSE00001725931.1"; level 2; transcript_support_level "NA"; ont "PGO:0000004"; tag "basic"; havana_gene "OTTHUMG00000021760.1"; havana_…
chrX	70125345	70125487	ENSG00000235382.1	.	-	HAVANA	exon	.	gene_id "ENSG00000235382.1"; transcript_id "ENST00000425607.1"; gene_type "processed_pseudogene"; gene_status "KNOWN"; gene_name "MTND4P31"; transcript_type "processed_pseudogene"; transcript_status "KNOWN"; transcript_name "MTND4P31-001"; exon_number 4; exon_id "ENSE00001775264.1"; level 2; transcript_support_level "NA"; ont "PGO:0000004"; tag "basic"; havana_gene "OTTHUMG00000021760.1"; havana_…
chrX	70124971	70125054	ENSG00000235382.1	.	-	HAVANA	exon	.	gene_id "ENSG00000235382.1"; transcript_id "ENST00000425607.1"; gene_type "processed_pseudogene"; gene_status "KNOWN"; gene_name "MTND4P31"; transcript_type "processed_pseudogene"; transcript_status "KNOWN"; transcript_name "MTND4P31-001"; exon_number 5; exon_id "ENSE00001766519.1"; level 2; transcript_support_level "NA"; ont "PGO:0000004"; tag "basic"; havana_gene "OTTHUMG00000021760.1"; havana_…
chrX	102008523	102009046	ENSG00000234901.1	.	-	HAVANA	exon	.	gene_id "ENSG00000234901.1"; transcript_id "ENST00000443510.1"; gene_type "processed_pseudogene"; gene_status "KNOWN"; gene_name "MTND6P13"; transcript_type "processed_pseudogene"; transcript_status "KNOWN"; transcript_name "MTND6P13-001"; exon_number 1; exon_id "ENSE00001634240.1"; level 2; transcript_support_level "NA"; ont "PGO:0000004"; tag "basic"; havana_gene "OTTHUMG00000022047.1"; havana_…
chrX	102785666	102786604	ENSG00000232282.1	.	+	HAVANA	exon	.	gene_id "ENSG00000232282.1"; transcript_id "ENST00000433043.1"; gene_type "processed_pseudogene"; gene_status "KNOWN"; gene_name "MTND1P32"; transcript_type "processed_pseudogene"; transcript_status "KNOWN"; transcript_name "MTND1P32-001"; exon_number 1; exon_id "ENSE00001615872.1"; level 2; transcript_support_level "NA"; ont "PGO:0000004"; tag "basic"; havana_gene "OTTHUMG00000022067.1"; havana_…
chrX	102786812	102787197	ENSG00000229954.1	.	+	HAVANA	exon	.	gene_id "ENSG00000229954.1"; transcript_id "ENST00000434633.1"; gene_type "processed_pseudogene"; gene_status "KNOWN"; gene_name "MTND2P2"; transcript_type "processed_pseudogene"; transcript_status "KNOWN"; transcript_name "MTND2P2-001"; exon_number 1; exon_id "ENSE00001782896.1"; level 2; transcript_support_level "NA"; ont "PGO:0000004"; tag "basic"; havana_gene "OTTHUMG00000022068.1"; havana_tr…
chrX	102787827	102788387	ENSG00000229954.1	.	+	HAVANA	exon	.	gene_id "ENSG00000229954.1"; transcript_id "ENST00000434633.1"; gene_type "processed_pseudogene"; gene_status "KNOWN"; gene_name "MTND2P2"; transcript_type "processed_pseudogene"; transcript_status "KNOWN"; transcript_name "MTND2P2-001"; exon_number 2; exon_id "ENSE00001623784.1"; level 2; transcript_support_level "NA"; ont "PGO:0000004"; tag "basic"; havana_gene "OTTHUMG00000022068.1"; havana_tr…
chrX	102799941	102801091	ENSG00000226056.1	.	+	HAVANA	exon	.	gene_id "ENSG00000226056.1"; transcript_id "ENST00000437189.1"; gene_type "processed_pseudogene"; gene_status "KNOWN"; gene_name "MTND4P32"; transcript_type "processed_pseudogene"; transcript_status "KNOWN"; transcript_name "MTND4P32-001"; exon_number 1; exon_id "ENSE00001695001.1"; level 2; transcript_support_level "NA"; ont "PGO:0000004"; tag "basic"; havana_gene "OTTHUMG00000022063.1"; havana_…
chrX	102801312	102801399	ENSG00000226056.1	.	+	HAVANA	exon	.	gene_id "ENSG00000226056.1"; transcript_id "ENST00000437189.1"; gene_type "processed_pseudogene"; gene_status "KNOWN"; gene_name "MTND4P32"; transcript_type "processed_pseudogene"; transcript_status "KNOWN"; transcript_name "MTND4P32-001"; exon_number 2; exon_id "ENSE00001615116.1"; level 2; transcript_support_level "NA"; ont "PGO:0000004"; tag "basic"; havana_gene "OTTHUMG00000022063.1"; havana_…
chrX	102803040	102803285	ENSG00000234886.1	.	+	HAVANA	exon	.	gene_id "ENSG00000234886.1"; transcript_id "ENST00000426018.1"; gene_type "processed_pseudogene"; gene_status "KNOWN"; gene_name "MTND5P26"; transcript_type "processed_pseudogene"; transcript_status "KNOWN"; transcript_name "MTND5P26-001"; exon_number 1; exon_id "ENSE00001632328.1"; level 2; transcript_support_level "NA"; ont "PGO:0000004"; tag "basic"; havana_gene "OTTHUMG00000022064.1"; havana_…
chrX	102804631	102806138	ENSG00000234886.1	.	+	HAVANA	exon	.	gene_id "ENSG00000234886.1"; transcript_id "ENST00000426018.1"; gene_type "processed_pseudogene"; gene_status "KNOWN"; gene_name "MTND5P26"; transcript_type "processed_pseudogene"; transcript_status "KNOWN"; transcript_name "MTND5P26-001"; exon_number 2; exon_id "ENSE00001758703.1"; level 2; transcript_support_level "NA"; ont "PGO:0000004"; tag "basic"; havana_gene "OTTHUMG00000022064.1"; havana_…
chrX	102806163	102806646	ENSG00000227649.1	.	-	HAVANA	exon	.	gene_id "ENSG00000227649.1"; transcript_id "ENST00000457611.1"; gene_type "processed_pseudogene"; gene_status "KNOWN"; gene_name "MTND6P32"; transcript_type "processed_pseudogene"; transcript_status "KNOWN"; transcript_name "MTND6P32-001"; exon_number 1; exon_id "ENSE00001746120.1"; level 2; transcript_support_level "NA"; ont "PGO:0000004"; tag "basic"; havana_gene "OTTHUMG00000022065.1"; havana_…
chrX	126472727	126472884	ENSG00000231501.1	.	+	HAVANA	exon	.	gene_id "ENSG00000231501.1"; transcript_id "ENST00000446263.1"; gene_type "processed_pseudogene"; gene_status "KNOWN"; gene_name "MTND4LP1"; transcript_type "processed_pseudogene"; transcript_status "KNOWN"; transcript_name "MTND4LP1-001"; exon_number 1; exon_id "ENSE00001787972.1"; level 2; transcript_support_level "NA"; ont "PGO:0000004"; tag "basic"; havana_gene "OTTHUMG00000022351.3"; havana_…
chrX	126472884	126473281	ENSG00000232177.1	.	+	HAVANA	exon	.	gene_id "ENSG00000232177.1"; transcript_id "ENST00000424002.1"; gene_type "processed_pseudogene"; gene_status "KNOWN"; gene_name "MTND4P24"; transcript_type "processed_pseudogene"; transcript_status "KNOWN"; transcript_name "MTND4P24-001"; exon_number 1; exon_id "ENSE00001797718.1"; level 2; transcript_support_level "NA"; ont "PGO:0000004"; tag "basic"; havana_gene "OTTHUMG00000022352.1"; havana_…
chrX	143433041	143433958	ENSG00000235539.1	.	+	HAVANA	exon	.	gene_id "ENSG00000235539.1"; transcript_id "ENST00000446251.1"; gene_type "processed_pseudogene"; gene_status "KNOWN"; gene_name "MTND1P33"; transcript_type "processed_pseudogene"; transcript_status "KNOWN"; transcript_name "MTND1P33-001"; exon_number 1; exon_id "ENSE00001788890.1"; level 2; transcript_support_level "NA"; ont "PGO:0000004"; tag "basic"; havana_gene "OTTHUMG00000022577.2"; havana_…
chrX	143434516	143435280	ENSG00000230130.1	.	+	HAVANA	exon	.	gene_id "ENSG00000230130.1"; transcript_id "ENST00000457230.1"; gene_type "processed_pseudogene"; gene_status "KNOWN"; gene_name "MTND2P39"; transcript_type "processed_pseudogene"; transcript_status "KNOWN"; transcript_name "MTND2P39-001"; exon_number 1; exon_id "ENSE00001758893.1"; level 2; transcript_support_level "NA"; ont "PGO:0000004"; tag "basic"; havana_gene "OTTHUMG00000022578.1"; havana_…
chrY	8363535	8363959	ENSG00000223955.1	.	-	HAVANA	exon	.	gene_id "ENSG00000223955.1"; transcript_id "ENST00000417434.1"; gene_type "processed_pseudogene"; gene_status "KNOWN"; gene_name "MTND6P1"; transcript_type "processed_pseudogene"; transcript_status "KNOWN"; transcript_name "MTND6P1-001"; exon_number 1; exon_id "ENSE00001733686.1"; level 2; transcript_support_level "NA"; ont "PGO:0000004"; tag "basic"; havana_gene "OTTHUMG00000041270.1"; havana_tr…
chrY	8371662	8372030	ENSG00000226529.1	.	+	HAVANA	exon	.	gene_id "ENSG00000226529.1"; transcript_id "ENST00000445453.1"; gene_type "processed_pseudogene"; gene_status "KNOWN"; gene_name "MTND1P1"; transcript_type "processed_pseudogene"; transcript_status "KNOWN"; transcript_name "MTND1P1-001"; exon_number 1; exon_id "ENSE00001631720.1"; level 2; transcript_support_level "NA"; ont "PGO:0000004"; tag "basic"; havana_gene "OTTHUMG00000041272.1"; havana_tr…
chrY	8372240	8372710	ENSG00000234850.1	.	+	HAVANA	exon	.	gene_id "ENSG00000234850.1"; transcript_id "ENST00000452458.1"; gene_type "processed_pseudogene"; gene_status "KNOWN"; gene_name "MTND2P3"; transcript_type "processed_pseudogene"; transcript_status "KNOWN"; transcript_name "MTND2P3-001"; exon_number 1; exon_id "ENSE00001688314.1"; level 2; transcript_support_level "NA"; ont "PGO:0000004"; tag "basic"; havana_gene "OTTHUMG00000041273.1"; havana_tr…
chrY	11445417	11445564	ENSG00000225433.3	.	-	HAVANA	exon	.	gene_id "ENSG00000225433.3"; transcript_id "ENST00000455231.3"; gene_type "unprocessed_pseudogene"; gene_status "KNOWN"; gene_name "MTND1P12"; transcript_type "unprocessed_pseudogene"; transcript_status "KNOWN"; transcript_name "MTND1P12-001"; exon_number 1; exon_id "ENSE00001599488.3"; level 2; transcript_support_level "NA"; ont "PGO:0000005"; tag "basic"; havana_gene "OTTHUMG00000188087.1"; hav…
chr1	235519970	235520685	ENSG00000238236.1	.	+	HAVANA	exon	.	gene_id "ENSG00000238236.1"; transcript_id "ENST00000457471.1"; gene_type "processed_pseudogene"; gene_status "KNOWN"; gene_name "MTCYBP14"; transcript_type "processed_pseudogene"; transcript_status "KNOWN"; transcript_name "MTCYBP14-001"; exon_number 1; exon_id "ENSE00001658542.1"; level 2; transcript_support_level "NA"; ont "PGO:0000004"; tag "basic"; havana_gene "OTTHUMG00000040469.2"; havana_…
chr1	237948016	237949143	ENSG00000232154.2	.	-	HAVANA	exon	.	gene_id "ENSG00000232154.2"; transcript_id "ENST00000433123.2"; gene_type "processed_pseudogene"; gene_status "KNOWN"; gene_name "MTCYBP15"; transcript_type "processed_pseudogene"; transcript_status "KNOWN"; transcript_name "MTCYBP15-001"; exon_number 1; exon_id "ENSE00001766252.2"; level 2; transcript_support_level "NA"; ont "PGO:0000004"; tag "basic"; havana_gene "OTTHUMG00000039591.2"; havana_…
chr2	82818130	82819264	ENSG00000227789.1	.	+	HAVANA	exon	.	gene_id "ENSG00000227789.1"; transcript_id "ENST00000419540.1"; gene_type "processed_pseudogene"; gene_status "KNOWN"; gene_name "MTCYBP7"; transcript_type "processed_pseudogene"; transcript_status "KNOWN"; transcript_name "MTCYBP7-001"; exon_number 1; exon_id "ENSE00001723657.1"; level 2; transcript_support_level "NA"; ont "PGO:0000004"; tag "not_organism_supported"; tag "basic"; havana_gene "OT…
chr2	130282678	130283329	ENSG00000233550.1	.	+	HAVANA	exon	.	gene_id "ENSG00000233550.1"; transcript_id "ENST00000422855.1"; gene_type "unprocessed_pseudogene"; gene_status "KNOWN"; gene_name "MTCYBP8"; transcript_type "unprocessed_pseudogene"; transcript_status "KNOWN"; transcript_name "MTCYBP8-001"; exon_number 1; exon_id "ENSE00001798043.1"; level 2; transcript_support_level "NA"; ont "PGO:0000005"; tag "basic"; havana_gene "OTTHUMG00000153774.1"; havan…
chr2	131369061	131369711	ENSG00000233285.1	.	-	HAVANA	exon	.	gene_id "ENSG00000233285.1"; transcript_id "ENST00000424905.1"; gene_type "unprocessed_pseudogene"; gene_status "KNOWN"; gene_name "MTCYBP10"; transcript_type "unprocessed_pseudogene"; transcript_status "KNOWN"; transcript_name "MTCYBP10-001"; exon_number 1; exon_id "ENSE00001653304.1"; level 2; transcript_support_level "NA"; ont "PGO:0000005"; tag "basic"; havana_gene "OTTHUMG00000153601.1"; hav…
chr2	143093055	143094164	ENSG00000224288.2	.	-	HAVANA	exon	.	gene_id "ENSG00000224288.2"; transcript_id "ENST00000447254.2"; gene_type "processed_pseudogene"; gene_status "KNOWN"; gene_name "MTCYBP11"; transcript_type "processed_pseudogene"; transcript_status "KNOWN"; transcript_name "MTCYBP11-001"; exon_number 1; exon_id "ENSE00001704279.2"; level 2; transcript_support_level "NA"; ont "PGO:0000004"; tag "basic"; havana_gene "OTTHUMG00000153818.2"; havana_…
chr2	155314065	155314368	ENSG00000229935.1	.	+	HAVANA	exon	.	gene_id "ENSG00000229935.1"; transcript_id "ENST00000431021.1"; gene_type "processed_pseudogene"; gene_status "KNOWN"; gene_name "MTCYBP9"; transcript_type "processed_pseudogene"; transcript_status "KNOWN"; transcript_name "MTCYBP9-001"; exon_number 1; exon_id "ENSE00001613555.1"; level 2; transcript_support_level "NA"; ont "PGO:0000004"; tag "basic"; havana_gene "OTTHUMG00000153815.1"; havana_tr…
chr4	64607702	64608831	ENSG00000251385.2	.	-	HAVANA	exon	.	gene_id "ENSG00000251385.2"; transcript_id "ENST00000509187.2"; gene_type "processed_pseudogene"; gene_status "KNOWN"; gene_name "MTCYBP16"; transcript_type "processed_pseudogene"; transcript_status "KNOWN"; transcript_name "MTCYBP16-001"; exon_number 1; exon_id "ENSE00002083059.2"; level 2; transcript_support_level "NA"; ont "PGO:0000004"; tag "basic"; havana_gene "OTTHUMG00000162338.3"; havana_…
chr4	155451616	155452405	ENSG00000249247.1	.	-	HAVANA	exon	.	gene_id "ENSG00000249247.1"; transcript_id "ENST00000503579.1"; gene_type "unprocessed_pseudogene"; gene_status "KNOWN"; gene_name "MTCYBP17"; transcript_type "unprocessed_pseudogene"; transcript_status "KNOWN"; transcript_name "MTCYBP17-001"; exon_number 1; exon_id "ENSE00002072180.1"; level 2; transcript_support_level "NA"; ont "PGO:0000005"; tag "basic"; havana_gene "OTTHUMG00000161820.1"; hav…
chr5	100045927	100046374	ENSG00000270232.1	.	-	HAVANA	exon	.	gene_id "ENSG00000270232.1"; transcript_id "ENST00000603788.1"; gene_type "processed_pseudogene"; gene_status "KNOWN"; gene_name "MTCYBP22"; transcript_type "processed_pseudogene"; transcript_status "KNOWN"; transcript_name "MTCYBP22-001"; exon_number 1; exon_id "ENSE00003500169.1"; level 2; transcript_support_level "NA"; ont "PGO:0000004"; tag "basic"; havana_gene "OTTHUMG00000185126.1"; havana_…
chr5	134923302	134924049	ENSG00000244921.2	.	-	HAVANA	exon	.	gene_id "ENSG00000244921.2"; transcript_id "ENST00000501056.2"; gene_type "processed_pseudogene"; gene_status "KNOWN"; gene_name "MTCYBP18"; transcript_type "processed_pseudogene"; transcript_status "KNOWN"; transcript_name "MTCYBP18-001"; exon_number 1; exon_id "ENSE00001978382.2"; level 2; transcript_support_level "NA"; ont "PGO:0000004"; tag "basic"; havana_gene "OTTHUMG00000163073.1"; havana_…
chr6	133150567	133150816	ENSG00000220113.2	.	+	HAVANA	exon	.	gene_id "ENSG00000220113.2"; transcript_id "ENST00000401524.2"; gene_type "processed_pseudogene"; gene_status "KNOWN"; gene_name "MTCYBP4"; transcript_type "processed_pseudogene"; transcript_status "KNOWN"; transcript_name "MTCYBP4-001"; exon_number 1; exon_id "ENSE00001562286.2"; level 2; transcript_support_level "NA"; ont "PGO:0000004"; tag "basic"; havana_gene "OTTHUMG00000015598.2"; havana_tr…
chr7	57173356	57174362	ENSG00000224880.1	.	+	HAVANA	exon	.	gene_id "ENSG00000224880.1"; transcript_id "ENST00000436327.1"; gene_type "unprocessed_pseudogene"; gene_status "KNOWN"; gene_name "MTCYBP29"; transcript_type "unprocessed_pseudogene"; transcript_status "KNOWN"; transcript_name "MTCYBP29-001"; exon_number 1; exon_id "ENSE00001629236.1"; level 2; transcript_support_level "NA"; ont "PGO:0000005"; tag "basic"; havana_gene "OTTHUMG00000156688.1"; hav…
chr7	57196637	57197772	ENSG00000234671.1	.	+	HAVANA	exon	.	gene_id "ENSG00000234671.1"; transcript_id "ENST00000423752.1"; gene_type "unprocessed_pseudogene"; gene_status "KNOWN"; gene_name "MTCYBP5"; transcript_type "unprocessed_pseudogene"; transcript_status "KNOWN"; transcript_name "MTCYBP5-001"; exon_number 1; exon_id "ENSE00001678774.1"; level 2; transcript_support_level "NA"; ont "PGO:0000005"; tag "basic"; havana_gene "OTTHUMG00000156684.1"; havan…
chr7	112374323	112375429	ENSG00000236232.1	.	+	HAVANA	exon	.	gene_id "ENSG00000236232.1"; transcript_id "ENST00000420387.1"; gene_type "unprocessed_pseudogene"; gene_status "KNOWN"; gene_name "MTCYBP24"; transcript_type "unprocessed_pseudogene"; transcript_status "KNOWN"; transcript_name "MTCYBP24-001"; exon_number 1; exon_id "ENSE00001784377.1"; level 2; transcript_support_level "NA"; ont "PGO:0000005"; tag "basic"; havana_gene "OTTHUMG00000155120.1"; hav…
chr7	117264392	117264530	ENSG00000230605.1	.	-	HAVANA	exon	.	gene_id "ENSG00000230605.1"; transcript_id "ENST00000441810.1"; gene_type "processed_pseudogene"; gene_status "KNOWN"; gene_name "MTCYBP6"; transcript_type "processed_pseudogene"; transcript_status "KNOWN"; transcript_name "MTCYBP6-001"; exon_number 1; exon_id "ENSE00001648749.1"; level 1; transcript_support_level "NA"; ont "PGO:0000004"; tag "pseudo_consens"; tag "basic"; havana_gene "OTTHUMG000…
chr8	36277762	36278886	ENSG00000253504.1	.	-	HAVANA	exon	.	gene_id "ENSG00000253504.1"; transcript_id "ENST00000517463.1"; gene_type "unprocessed_pseudogene"; gene_status "KNOWN"; gene_name "MTCYBP19"; transcript_type "unprocessed_pseudogene"; transcript_status "KNOWN"; transcript_name "MTCYBP19-001"; exon_number 1; exon_id "ENSE00002120729.1"; level 2; transcript_support_level "NA"; ont "PGO:0000005"; tag "basic"; havana_gene "OTTHUMG00000163974.1"; hav…
chr8	46837577	46838706	ENSG00000254118.1	.	-	HAVANA	exon	.	gene_id "ENSG00000254118.1"; transcript_id "ENST00000524239.1"; gene_type "processed_pseudogene"; gene_status "KNOWN"; gene_name "MTCYBP20"; transcript_type "processed_pseudogene"; transcript_status "KNOWN"; transcript_name "MTCYBP20-001"; exon_number 1; exon_id "ENSE00002109203.1"; level 2; transcript_support_level "NA"; ont "PGO:0000004"; tag "basic"; havana_gene "OTTHUMG00000164133.1"; havana_…
chr13	95694568	95695705	ENSG00000232373.2	.	+	HAVANA	exon	.	gene_id "ENSG00000232373.2"; transcript_id "ENST00000445588.2"; gene_type "processed_pseudogene"; gene_status "KNOWN"; gene_name "MTCYBP3"; transcript_type "processed_pseudogene"; transcript_status "KNOWN"; transcript_name "MTCYBP3-001"; exon_number 1; exon_id "ENSE00001760795.2"; level 2; transcript_support_level "NA"; ont "PGO:0000004"; tag "basic"; havana_gene "OTTHUMG00000017221.2"; havana_tr…
chr14	84176418	84177088	ENSG00000259012.2	.	+	HAVANA	exon	.	gene_id "ENSG00000259012.2"; transcript_id "ENST00000555160.2"; gene_type "processed_pseudogene"; gene_status "KNOWN"; gene_name "MTCYBP27"; transcript_type "processed_pseudogene"; transcript_status "KNOWN"; transcript_name "MTCYBP27-001"; exon_number 1; exon_id "ENSE00002461418.2"; level 2; transcript_support_level "NA"; ont "PGO:0000004"; tag "basic"; havana_gene "OTTHUMG00000171377.2"; havana_…
chr15	58154959	58156061	ENSG00000259671.1	.	+	HAVANA	exon	.	gene_id "ENSG00000259671.1"; transcript_id "ENST00000558717.1"; gene_type "processed_pseudogene"; gene_status "KNOWN"; gene_name "MTCYBP23"; transcript_type "processed_pseudogene"; transcript_status "KNOWN"; transcript_name "MTCYBP23-001"; exon_number 1; exon_id "ENSE00002564756.1"; level 2; transcript_support_level "NA"; ont "PGO:0000004"; tag "basic"; havana_gene "OTTHUMG00000171999.1"; havana_…
chr16	82120637	82121769	ENSG00000260161.1	.	-	HAVANA	exon	.	gene_id "ENSG00000260161.1"; transcript_id "ENST00000566728.1"; gene_type "processed_pseudogene"; gene_status "KNOWN"; gene_name "MTCYBP28"; transcript_type "processed_pseudogene"; transcript_status "KNOWN"; transcript_name "MTCYBP28-001"; exon_number 1; exon_id "ENSE00002615756.1"; level 2; transcript_support_level "NA"; ont "PGO:0000004"; tag "basic"; havana_gene "OTTHUMG00000176576.1"; havana_…
chr17	22519616	22520709	ENSG00000266529.1	.	+	HAVANA	exon	.	gene_id "ENSG00000266529.1"; transcript_id "ENST00000578634.1"; gene_type "unprocessed_pseudogene"; gene_status "KNOWN"; gene_name "MTCYBP13"; transcript_type "unprocessed_pseudogene"; transcript_status "KNOWN"; transcript_name "MTCYBP13-001"; exon_number 1; exon_id "ENSE00002707915.1"; level 2; transcript_support_level "NA"; ont "PGO:0000005"; tag "basic"; havana_gene "OTTHUMG00000179067.1"; hav…
chr21	44472097	44472516	ENSG00000224747.1	.	-	HAVANA	exon	.	gene_id "ENSG00000224747.1"; transcript_id "ENST00000443300.1"; gene_type "processed_pseudogene"; gene_status "KNOWN"; gene_name "MTCYBP21"; transcript_type "processed_pseudogene"; transcript_status "KNOWN"; transcript_name "MTCYBP21-001"; exon_number 1; exon_id "ENSE00001774227.1"; level 2; transcript_support_level "NA"; ont "PGO:0000004"; tag "basic"; havana_gene "OTTHUMG00000040846.1"; havana_…
chr21	44470669	44470927	ENSG00000224747.1	.	-	HAVANA	exon	.	gene_id "ENSG00000224747.1"; transcript_id "ENST00000443300.1"; gene_type "processed_pseudogene"; gene_status "KNOWN"; gene_name "MTCYBP21"; transcript_type "processed_pseudogene"; transcript_status "KNOWN"; transcript_name "MTCYBP21-001"; exon_number 2; exon_id "ENSE00001716424.1"; level 2; transcript_support_level "NA"; ont "PGO:0000004"; tag "basic"; havana_gene "OTTHUMG00000040846.1"; havana_…
chr21	44469928	44470364	ENSG00000224747.1	.	-	HAVANA	exon	.	gene_id "ENSG00000224747.1"; transcript_id "ENST00000443300.1"; gene_type "processed_pseudogene"; gene_status "KNOWN"; gene_name "MTCYBP21"; transcript_type "processed_pseudogene"; transcript_status "KNOWN"; transcript_name "MTCYBP21-001"; exon_number 3; exon_id "ENSE00001607690.1"; level 2; transcript_support_level "NA"; ont "PGO:0000004"; tag "basic"; havana_gene "OTTHUMG00000040846.1"; havana_…
chrX	5169511	5170645	ENSG00000226313.1	.	+	HAVANA	exon	.	gene_id "ENSG00000226313.1"; transcript_id "ENST00000440559.1"; gene_type "processed_pseudogene"; gene_status "KNOWN"; gene_name "MTCYBP12"; transcript_type "processed_pseudogene"; transcript_status "KNOWN"; transcript_name "MTCYBP12-001"; exon_number 1; exon_id "ENSE00001609662.1"; level 1; transcript_support_level "NA"; ont "PGO:0000004"; tag "pseudo_consens"; tag "basic"; havana_gene "OTTHUMG0…
chrX	70120352	70121474	ENSG00000226579.1	.	-	HAVANA	exon	.	gene_id "ENSG00000226579.1"; transcript_id "ENST00000438855.1"; gene_type "processed_pseudogene"; gene_status "KNOWN"; gene_name "MTCYBP31"; transcript_type "processed_pseudogene"; transcript_status "KNOWN"; transcript_name "MTCYBP31-001"; exon_number 1; exon_id "ENSE00001673467.1"; level 2; transcript_support_level "NA"; ont "PGO:0000004"; tag "basic"; havana_gene "OTTHUMG00000021761.1"; havana_…
chrX	102806740	102807824	ENSG00000229794.2	.	+	HAVANA	exon	.	gene_id "ENSG00000229794.2"; transcript_id "ENST00000427945.2"; gene_type "processed_pseudogene"; gene_status "KNOWN"; gene_name "MTCYBP32"; transcript_type "processed_pseudogene"; transcript_status "KNOWN"; transcript_name "MTCYBP32-001"; exon_number 1; exon_id "ENSE00001759129.2"; level 2; transcript_support_level "NA"; ont "PGO:0000004"; tag "basic"; havana_gene "OTTHUMG00000022066.2"; havana_…
chrY	8364031	8365150	ENSG00000234179.1	.	+	HAVANA	exon	.	gene_id "ENSG00000234179.1"; transcript_id "ENST00000454315.1"; gene_type "processed_pseudogene"; gene_status "KNOWN"; gene_name "MTCYBP1"; transcript_type "processed_pseudogene"; transcript_status "KNOWN"; transcript_name "MTCYBP1-001"; exon_number 1; exon_id "ENSE00001680177.1"; level 2; transcript_support_level "NA"; ont "PGO:0000004"; tag "basic"; havana_gene "OTTHUMG00000041271.1"; havana_tr…
chrY	18872101	18872272	ENSG00000217179.1	.	+	HAVANA	exon	.	gene_id "ENSG00000217179.1"; transcript_id "ENST00000407745.1"; gene_type "processed_pseudogene"; gene_status "KNOWN"; gene_name "MTCYBP2"; transcript_type "processed_pseudogene"; transcript_status "KNOWN"; transcript_name "MTCYBP2-001"; exon_number 1; exon_id "ENSE00001563558.1"; level 2; transcript_support_level "NA"; ont "PGO:0000004"; tag "basic"; havana_gene "OTTHUMG00000036510.1"; havana_tr…

## Sheet: Mouse mito. pseudo genes
Chromosome	Start	End	Name	Homology	Strand
chr1	24613970	24614651	mt-atp6_p1_LOC100503946	1	-
chr18	65837286	65837477	mt-atp6_p2_none	0.93	+
chr1	24614608	24614812	mt-atp8_p1_DS_LOC100503946	1	-
chr2	22588102	22589647	mt-co1_p1_Myo3a_intron_RC	0.98	-
chr1	24615705	24616188	mt-co1_p2_none	0.99	-
chr11	90538481	90539137	mt-co1_p3_Stxbp4_intron	0.91	-
chr9	93175666	93176340	mt-co1_p4_none	0.8	-
chr1	24614881	24615565	mt-co2_p1_none	1	-
chr2	22587290	22587962	mt-co2_p2_Myo3a_intron_RC	0.96	-
chr9	93174654	93175297	mt-co2_p3_none	0.8	-
chr11	44387110	44387269	mt-co2_p4_none	0.89	-
chr1	24613187	24613971	mt-co3_p1_UP_LOC100503946	1	-
chr1	65420849	65421120	mt-co3_p2_none	0.82	-
chr18	75005179	75005289	mt-co3_p3_none	0.82	-
chr2	22590023	22590534	mt-nd2_p1_Myo3a_intron_RC	0.97	-
chr5	60042717	60042819	mt-nd2_p2_none	0.97	+
chr1	188978336	188978423	mt-nd2_p3_Kctd3_intron	0.93	-
chr12	4077302	4077358	mt-nd2_p4_none	0.91	-
chr1	24612771	24613116	mt-nd3_p1_none	1	-
chr1	24611534	24612410	mt-nd4_p1_none	1	-
chr1	142729526	142730010	mt-nd4_p2_none	0.75	+
chr18	22373115	22373264	mt-nd4_p3_Asxl3_RC	0.85	-
chr8	29965415	29965448	mt-nd4_p4_none	0.97	-
chr1	24612403	24612700	mt-nd4l_p1_Gm10222	1	-
chr4	80002329	80003409	mt-nd5_p1_none	0.92	+
chr13	85126561	85127515	mt-nd5_p2_none	0.95	-
chr18	3638870	3639150	mt-nd5_p3_none	0.89	+
chr10	60162357	60162421	mt-nd5_p4_none	0.89	-
chr4	80003395	80003914	mt-nd6_p1_none	0.94	-
chr4	80003989	80005132	mt-cytb_p1_none	0.93	+
chr5	7276298	7276873	mt-cytb_p2_Zfp804b_intron_RC	0.83	+
