# Supplementary material for: The molecular basis of coupling between poly(A)-tail length and translational efficiency
Source: eLife. 2021 Jul 2;10:e66493. doi: 10.7554/eLife.66493 (PMC8253595; doi:10.7554/eLife.66493)
Supplement: Supplementary file 5. [file elife-66493-supp5.xlsx]

## Sheet: Frog_oocyte
Supplementary File 5. mRNA 3′-end annotations.
pA_site	gene_id	chr	chr_start	chr_end	chr_strand	pA_site_type
pA_chr5L-286	Xelaev18026741m.g	chr5L	48375954	48375995	+	unique
pA_chr6S-18	Xelaev18033828m.g	chr6S	101214230	101214271	-	unique
pA_chr3L-16	Xelaev18018162m.g	chr3L	89269570	89269611	+	unique
pA_chr7S-3	Xelaev18037367m.g	chr7S	49936982	49937023	+	unique
pA_chr4L-2	Xelaev18023131m.g	chr4L	83511943	83511984	+	unique
pA_chr6S-17	Xelaev18032686m.g	chr6S	1901020	1901061	-	unique
pA_chr6L-3	Xelaev18031734m.g	chr6L	95074390	95074431	+	unique
pA_chr5L-27	Xelaev18026410m.g	chr5L	23223386	23223427	+	unique
pA_chr7S-5	Xelaev18037541m.g	chr7S	63612043	63612084	-	unique
pA_chr3S-1	Xelaev18020679m.g	chr3S	53598705	53598746	-	unique
pA_chr2S-8	Xelaev18016158m.g	chr2S	134893559	134893600	-	unique
pA_chr3L-18	Xelaev18018161m.g	chr3L	89259624	89259665	+	unique
pA_chr4L-3	Xelaev18022472m.g	chr4L	37485657	37485698	+	unique
pA_chr8S-5	Xelaev18042532m.g	chr8S	82263890	82263931	+	unique
pA_chr9_10S-25	Xelaev18047575m.g	chr9_10S	87392700	87392741	-	unique
pA_chr1S-61	Xelaev18010928m.g	chr1S	158713222	158713263	-	unique
pA_chr3L-23	Xelaev18016933m.g	chr3L	14909780	14909821	-	unique
pA_chr2L-5	Xelaev18013589m.g	chr2L	149239357	149239398	+	unique
pA_chr6L-17	Xelaev18030970m.g	chr6L	38483249	38483290	-	unique
pA_chr7L-18	Xelaev18035694m.g	chr7L	88697154	88697195	-	unique
pA_chr4S-8	Xelaev18025244m.g	chr4S	67652531	67652572	+	unique
pA_chr5L-11	Xelaev18028040m.g	chr5L	138086200	138086241	+	unique
pA_chr2S-13	Xelaev18015209m.g	chr2S	70691714	70691755	+	unique
pA_chr8L-35	Xelaev18039722m.g	chr8L	74854625	74854666	-	unique
pA_chr6S-1	Xelaev18033520m.g	chr6S	75152989	75153030	-	unique
pA_chr8S-2	Xelaev18042961m.g	chr8S	97653878	97653919	+	unique
pA_chr9_10S-7	Xelaev18047052m.g	chr9_10S	48249677	48249718	+	unique
pA_chr4S-2	Xelaev18024961m.g	chr4S	47194350	47194391	-	unique
pA_chr5S-50	Xelaev18029222m.g	chr5S	56338533	56338574	-	unique
pA_chr2S-14	Xelaev18015437m.g	chr2S	87618994	87619035	+	unique
pA_chr9_10S-1	Xelaev18047692m.g	chr9_10S	93876026	93876067	+	unique
pA_chr2S-3	Xelaev18015031m.g	chr2S	62257845	62257886	-	unique
pA_chr9_10L-31	Xelaev18043893m.g	chr9_10L	31169286	31169327	-	unique
pA_chr7L-32	Xelaev18034922m.g	chr7L	43277338	43277379	+	unique
pA_chr3S-3	Xelaev18019792m.g	chr3S	3502977	3503018	-	unique
pA_chr5L-1	Xelaev18027510m.g	chr5L	102248478	102248519	-	unique
pA_chr2S-10	Xelaev18015999m.g	chr2S	127120663	127120704	+	unique
pA_chr1S-51	Xelaev18009326m.g	chr1S	54832589	54832630	+	unique
pA_chr9_10L-7	Xelaev18045675m.g	chr9_10L	114730757	114730798	-	unique
pA_chr9_10S-4	Xelaev18046739m.g	chr9_10S	34512327	34512368	-	unique
pA_chr7L-9	Xelaev18035485m.g	chr7L	77169660	77169701	-	unique
pA_chr9_10S-40	Xelaev18046869m.g	chr9_10S	40083765	40083806	+	unique
pA_chr6L-16	Xelaev18032487m.g	chr6L	152978523	152978564	-	unique
pA_chr9_10L-20	Xelaev18044525m.g	chr9_10L	53010385	53010426	+	unique
pA_chr7L-8	Xelaev18035406m.g	chr7L	73702617	73702658	+	unique
pA_chr1L-2	Xelaev18005732m.g	chr1L	68102888	68102929	+	unique
pA_chr9_10L-13	Xelaev18044106m.g	chr9_10L	37902948	37902989	-	unique
pA_chr7S-4	Xelaev18036724m.g	chr7S	4933206	4933247	+	unique
pA_chr3L-13	Xelaev18019226m.g	chr3L	136703365	136703406	+	unique
pA_chr6L-42	Xelaev18032206m.g	chr6L	129021091	129021132	-	unique
pA_chr3L-22	Xelaev18019668m.g	chr3L	143996393	143996434	+	unique
pA_chr9_10L-71	Xelaev18043488m.g	chr9_10L	13387574	13387615	-	unique
pA_chr2L-29	Xelaev18012110m.g	chr2L	58819269	58819310	-	unique
pA_chr8L-2	Xelaev18038892m.g	chr8L	38444317	38444358	+	unique
pA_chr2L-6	Xelaev18012536m.g	chr2L	84223294	84223335	+	unique
pA_chr9_10L-56	Xelaev18045397m.g	chr9_10L	104761220	104761261	+	unique
pA_chr4S-3	Xelaev18025736m.g	chr4S	96821158	96821199	-	unique
pA_chr9_10L-46	Xelaev18043865m.g	chr9_10L	30318132	30318173	+	unique
pA_chr9_10L-21	Xelaev18045676m.g	chr9_10L	114745284	114745325	+	unique
pA_chr4L-7	Xelaev18022134m.g	chr4L	22385182	22385223	-	unique
pA_chr1L-18	Xelaev18005855m.g	chr1L	76123867	76123908	+	unique
pA_chr4S-10	Xelaev18025407m.g	chr4S	78701222	78701263	-	unique
pA_chr1S-12	Xelaev18010165m.g	chr1S	110604269	110604310	+	unique
pA_chr3L-26	Xelaev18019056m.g	chr3L	132446005	132446046	-	unique
pA_chr2L-79	Xelaev18012612m.g	chr2L	88279342	88279383	-	unique
pA_chr8L-30	Xelaev18038230m.g	chr8L	2135968	2136009	-	unique
pA_chr6S-65	Xelaev18033732m.g	chr6S	92653109	92653150	-	unique
pA_chr2L-134	Xelaev18013704m.g	chr2L	154985442	154985483	-	unique
pA_chr5L-176	Xelaev18028043m.g	chr5L	138402934	138402975	-	unique
pA_chr6S-16	Xelaev18033686m.g	chr6S	88910443	88910484	+	unique
pA_chr9_10L-15	Xelaev18044794m.g	chr9_10L	71024765	71024806	+	unique
pA_chr1L-35	Xelaev18006829m.g	chr1L	125405373	125405414	-	unique
pA_chr8L-31	Xelaev18038264m.g	chr8L	2487978	2488019	+	unique
pA_chr9_10L-3	Xelaev18045423m.g	chr9_10L	105372463	105372504	+	unique
pA_chr4S-4	Xelaev18024414m.g	chr4S	10405627	10405668	+	unique
pA_chr2L-25	Xelaev18013610m.g	chr2L	150194891	150194932	+	unique
pA_chr5S-7	Xelaev18030079m.g	chr5S	119091676	119091717	+	unique
pA_chr8L-17	Xelaev18038552m.g	chr8L	16177593	16177634	-	unique
pA_chr2S-86	Xelaev18015216m.g	chr2S	70827011	70827052	+	unique
pA_chr9_10S-9	Xelaev18047441m.g	chr9_10S	76620487	76620528	+	unique
pA_chr2L-71	Xelaev18013534m.g	chr2L	146482155	146482196	+	unique
pA_chr4L-130	Xelaev18022787m.g	chr4L	62417069	62417110	-	unique
pA_chr1L-3	Xelaev18007338m.g	chr1L	141833003	141833044	+	unique
pA_chr2S-7	Xelaev18016174m.g	chr2S	136281449	136281490	+	unique
pA_chr9_10L-78	Xelaev18044272m.g	chr9_10L	43984154	43984195	+	unique
pA_chr9_10L-9	Xelaev18043104m.g	chr9_10L	1002457	1002498	-	unique
pA_chr7L-52	Xelaev18034420m.g	chr7L	7824360	7824401	+	unique
pA_chr2S-9	Xelaev18016186m.g	chr2S	137265733	137265774	+	unique
pA_chr9_10L-140	Xelaev18044267m.g	chr9_10L	43873973	43874014	+	unique
pA_chr9_10S-17	Xelaev18047673m.g	chr9_10S	93352209	93352250	+	unique
pA_chr9_10S-11	Xelaev18045905m.g	chr9_10S	1427659	1427700	-	unique
pA_chr9_10S-5	Xelaev18047886m.g	chr9_10S	102075326	102075367	-	unique
pA_chr3L-28	Xelaev18018326m.g	chr3L	98822054	98822095	+	unique
pA_chr2S-12	Xelaev18014220m.g	chr2S	8147957	8147998	-	unique
pA_chr5S-22	Xelaev18030082m.g	chr5S	119422841	119422882	-	unique
pA_chr1L-7	Xelaev18006949m.g	chr1L	133578092	133578133	+	unique
pA_chr1S-13	Xelaev18010675m.g	chr1S	136289192	136289233	-	unique
pA_chr3L-31	Xelaev18016974m.g	chr3L	17366400	17366441	-	unique
pA_chr8L-26	Xelaev18038679m.g	chr8L	22624672	22624713	-	unique
pA_chr6S-3	Xelaev18033059m.g	chr6S	32673380	32673421	-	unique
pA_chr4S-7	Xelaev18025864m.g	chr4S	104586554	104586595	+	unique
pA_chr4S-16	Xelaev18025447m.g	chr4S	80799084	80799125	+	unique
pA_chr9_10L-19	Xelaev18043710m.g	chr9_10L	21310443	21310484	+	unique
pA_chr2L-14	Xelaev18012861m.g	chr2L	103371558	103371599	+	unique
pA_chr1L-28	Xelaev18008213m.g	chr1L	189910120	189910161	-	unique
pA_chr2L-36	Xelaev18013636m.g	chr2L	151008397	151008438	-	unique
pA_chr8S-8	Xelaev18042169m.g	chr8S	61037575	61037616	-	unique
pA_chr6L-20	Xelaev18032512m.g	chr6L	153585187	153585228	+	unique
pA_chr1S-4	Xelaev18009158m.g	chr1S	37658975	37659016	+	unique
pA_chr2L-26	Xelaev18012146m.g	chr2L	59937921	59937962	+	unique
pA_chr9_10L-16	Xelaev18044791m.g	chr9_10L	70933149	70933190	+	unique
pA_chr1L-8	Xelaev18006348m.g	chr1L	100300813	100300854	-	unique
pA_chr7S-67	Xelaev18036725m.g	chr7S	4950639	4950680	+	unique
pA_chr4S-13	Xelaev18024336m.g	chr4S	6673748	6673789	-	unique
pA_chr7S-12	Xelaev18037483m.g	chr7S	59283975	59284016	+	unique
pA_chr2L-28	Xelaev18013486m.g	chr2L	144167075	144167116	-	unique
pA_chr9_10L-17	Xelaev18044959m.g	chr9_10L	80900087	80900128	+	unique
pA_chr2S-30	Xelaev18015901m.g	chr2S	121442030	121442071	-	unique
pA_chr5S-8	Xelaev18029833m.g	chr5S	103145737	103145778	+	unique
pA_chr3L-46	Xelaev18018518m.g	chr3L	113076474	113076515	+	unique
pA_chr6S-6	Xelaev18033063m.g	chr6S	33204659	33204700	+	unique
pA_chr6S-45	Xelaev18033879m.g	chr6S	105368169	105368210	-	unique
pA_chr2S-98	Xelaev18014856m.g	chr2S	54697201	54697242	-	unique
pA_chr6L-211	Xelaev18032137m.g	chr6L	124480603	124480644	-	unique
pA_chr7L-13	Xelaev18034801m.g	chr7L	34211649	34211690	+	unique
pA_chr8L-135	Xelaev18039029m.g	chr8L	48108928	48108969	-	unique
pA_chr5S-12	Xelaev18030190m.g	chr5S	130371341	130371382	+	unique
pA_chr9_10S-2	Xelaev18046308m.g	chr9_10S	15940486	15940527	+	unique
pA_chr6L-15	Xelaev18030978m.g	chr6L	39054082	39054123	+	unique
pA_chr4L-15	Xelaev18023037m.g	chr4L	77787392	77787433	-	unique
pA_chr9_10L-34	Xelaev18045052m.g	chr9_10L	84654720	84654761	-	unique
pA_chr3S-2	Xelaev18020745m.g	chr3S	57567443	57567484	+	unique
pA_chr3S-23	Xelaev18021238m.g	chr3S	90093454	90093495	-	unique
pA_chr6L-10	Xelaev18032031m.g	chr6L	116483399	116483440	-	unique
pA_chr4S-5	Xelaev18025032m.g	chr4S	51561071	51561112	-	unique
pA_chr5L-12	Xelaev18027294m.g	chr5L	87951236	87951277	+	unique
pA_chr5S-13	Xelaev18030066m.g	chr5S	118183171	118183212	+	unique
pA_chr9_10L-18	Xelaev18045643m.g	chr9_10L	114138167	114138208	-	unique
pA_chr5L-7	Xelaev18027324m.g	chr5L	89620729	89620770	+	unique
pA_chr9_10S-147	Xelaev18047705m.g	chr9_10S	94421913	94421954	-	unique
pA_chr2L-9	Xelaev18013545m.g	chr2L	147176727	147176768	+	unique
pA_chr7L-17	Xelaev18035407m.g	chr7L	73706435	73706476	+	unique
pA_chr2S-17	Xelaev18015820m.g	chr2S	118603239	118603280	-	unique
pA_chr1L-10	Xelaev18005024m.g	chr1L	12281758	12281799	-	unique
pA_chr7L-10	Xelaev18035585m.g	chr7L	83355156	83355197	-	unique
pA_chr8L-32	Xelaev18038952m.g	chr8L	44216401	44216442	-	unique
pA_chr9_10S-18	Xelaev18046385m.g	chr9_10S	17476106	17476147	+	unique
pA_chr9_10S-16	Xelaev18046555m.g	chr9_10S	27155706	27155747	-	unique
pA_chr8S-33	Xelaev18041349m.g	chr8S	24717427	24717468	+	unique
pA_chr6L-11	Xelaev18031174m.g	chr6L	54643132	54643173	-	unique
pA_chr6S-10	Xelaev18033513m.g	chr6S	74700119	74700160	-	unique
pA_chr1L-190	Xelaev18007951m.g	chr1L	169539555	169539596	-	unique
pA_chr2S-33	Xelaev18014444m.g	chr2S	27918087	27918128	-	unique
pA_chr6L-35	Xelaev18031534m.g	chr6L	82243038	82243079	+	unique
pA_chr3S-7	Xelaev18021534m.g	chr3S	114113002	114113043	-	unique
pA_chr8L-37	Xelaev18040857m.g	chr8L	118097934	118097975	+	unique
pA_chr1L-29	Xelaev18005871m.g	chr1L	77144582	77144623	+	unique
pA_chr4L-24	Xelaev18023642m.g	chr4L	112841301	112841342	+	unique
pA_chr7L-16	Xelaev18034469m.g	chr7L	11442956	11442997	+	unique
pA_chr1L-9	Xelaev18006543m.g	chr1L	107105662	107105703	-	unique
pA_chr4L-18	Xelaev18023142m.g	chr4L	83743271	83743312	-	unique
pA_chr4L-46	Xelaev18022889m.g	chr4L	66828488	66828529	+	unique
pA_chr3S-24	Xelaev18020451m.g	chr3S	37074417	37074458	+	unique
pA_chr2L-27	Xelaev18012172m.g	chr2L	61943861	61943902	-	unique
pA_chr8L-10	Xelaev18039125m.g	chr8L	50672074	50672115	+	unique
pA_chr5S-11	Xelaev18028993m.g	chr5S	39618479	39618520	+	unique
pA_chr9_10S-28	Xelaev18046205m.g	chr9_10S	12055034	12055075	-	unique
pA_chr1L-33	Xelaev18007868m.g	chr1L	164626162	164626203	-	unique
pA_chr2L-11	Xelaev18011916m.g	chr2L	47065887	47065928	-	unique
pA_chr6S-43	Xelaev18033797m.g	chr6S	98136776	98136817	-	unique
pA_chr4L-19	Xelaev18022367m.g	chr4L	30862107	30862148	+	unique
pA_chr4L-5	Xelaev18023748m.g	chr4L	116946505	116946546	-	unique
pA_chr1L-85	Xelaev18007761m.g	chr1L	160755075	160755116	+	unique
pA_chr2L-16	Xelaev18011478m.g	chr2L	13640940	13640981	+	unique
pA_chr2S-71	Xelaev18015864m.g	chr2S	120281994	120282035	-	unique
pA_chr1S-2	Xelaev18009423m.g	chr1S	62641786	62641827	+	unique
pA_chr9_10L-5	Xelaev18043477m.g	chr9_10L	12157326	12157367	-	unique
pA_chr2L-34	Xelaev18012050m.g	chr2L	56723402	56723443	-	unique
pA_chr8L-16	Xelaev18038180m.g	chr8L	1451889	1451930	-	unique
pA_chr8S-16	Xelaev18041485m.g	chr8S	27678026	27678067	+	unique
pA_chr4L-13	Xelaev18021963m.g	chr4L	12768385	12768426	-	unique
pA_chr9_10S-15	Xelaev18046316m.g	chr9_10S	16190311	16190352	+	unique
pA_chr3S-4	Xelaev18020100m.g	chr3S	18879981	18880022	-	unique
pA_chr9_10L-30	Xelaev18045247m.g	chr9_10L	96544726	96544767	+	unique
pA_chr2L-15	Xelaev18013289m.g	chr2L	135944864	135944905	+	unique
pA_chr3L-51	Xelaev18018020m.g	chr3L	82394164	82394205	-	unique
pA_chr3S-16	Xelaev18020022m.g	chr3S	14186917	14186958	+	unique
pA_chr9_10S-48	Xelaev18046924m.g	chr9_10S	41664742	41664783	+	unique
pA_chr1L-79	Xelaev18005517m.g	chr1L	51361184	51361225	-	unique
pA_chr7L-20	Xelaev18034355m.g	chr7L	6529331	6529372	-	unique
pA_chr4L-68	Xelaev18023349m.g	chr4L	96308028	96308069	-	unique
pA_chr4L-9	Xelaev18022158m.g	chr4L	23184793	23184834	-	unique
pA_chr9_10L-33	Xelaev18043144m.g	chr9_10L	1710239	1710280	-	unique
pA_chr4S-61	Xelaev18025668m.g	chr4S	94354452	94354493	-	unique
pA_chr7L-62	Xelaev18035213m.g	chr7L	60001615	60001656	-	unique
pA_chr4L-40	Xelaev18023939m.g	chr4L	126074553	126074594	-	unique
pA_chr3S-44	Xelaev18021333m.g	chr3S	97208105	97208146	-	unique
pA_chr3L-36	Xelaev18019581m.g	chr3L	142830531	142830572	-	unique
pA_chr5L-16	Xelaev18026389m.g	chr5L	22950300	22950341	+	unique
pA_chr3S-33	Xelaev18020003m.g	chr3S	13615442	13615483	+	unique
pA_chr5S-14	Xelaev18029462m.g	chr5S	73782377	73782418	+	unique
pA_chr6L-58	Xelaev18030980m.g	chr6L	39098004	39098045	+	unique
pA_chr8S-22	Xelaev18041786m.g	chr8S	38251202	38251243	-	unique
pA_chr9_10L-25	Xelaev18044072m.g	chr9_10L	37062687	37062728	-	unique
pA_chr1L-42	Xelaev18006386m.g	chr1L	101754829	101754870	-	unique
pA_chr2L-13	Xelaev18012026m.g	chr2L	55014589	55014630	+	unique
pA_chr3S-26	Xelaev18021385m.g	chr3S	99754558	99754599	+	unique
pA_chr3L-41	Xelaev18018310m.g	chr3L	98016034	98016075	+	unique
pA_chr1S-89	Xelaev18009003m.g	chr1S	25250579	25250620	-	unique
pA_chr5L-36	Xelaev18027252m.g	chr5L	83644911	83644952	+	unique
pA_chr1S-33	Xelaev18010829m.g	chr1S	151086176	151086217	+	unique
pA_chr1L-229	Xelaev18007581m.g	chr1L	151836735	151836776	-	unique
pA_chr2S-48	Xelaev18014700m.g	chr2S	43739336	43739377	-	unique
pA_chr7L-37	Xelaev18034349m.g	chr7L	6388018	6388059	-	unique
pA_chr6L-76	Xelaev18032341m.g	chr6L	141653954	141653995	-	unique
pA_chr3S-12	Xelaev18021112m.g	chr3S	82054622	82054663	+	unique
pA_chr2S-24	Xelaev18016352m.g	chr2S	151002882	151002923	-	unique
pA_chr5S-6	Xelaev18029579m.g	chr5S	83045583	83045624	-	unique
pA_chr6L-8	Xelaev18030954m.g	chr6L	36828679	36828720	+	unique
pA_chr1L-23	Xelaev18005128m.g	chr1L	19290582	19290623	+	unique
pA_chr1S-8	Xelaev18009820m.g	chr1S	86688803	86688844	+	unique
pA_chr5S-31	Xelaev18029408m.g	chr5S	69862106	69862147	+	unique
pA_chr1L-6	Xelaev18006122m.g	chr1L	90480997	90481038	-	unique
pA_chr2L-182	Xelaev18013674m.g	chr2L	152872125	152872166	-	unique
pA_chr6L-7	Xelaev18032410m.g	chr6L	149157751	149157792	-	unique
pA_chr9_10L-12	Xelaev18045802m.g	chr9_10L	117345523	117345564	-	unique
pA_chr8S-44	Xelaev18041030m.g	chr8S	2646902	2646943	+	unique
pA_chr4L-42	Xelaev18022719m.g	chr4L	56132360	56132401	+	unique
pA_chr2L-94	Xelaev18013721m.g	chr2L	156486718	156486759	+	unique
pA_chr6L-73	Xelaev18030937m.g	chr6L	35437749	35437790	+	unique
pA_chr2L-10	Xelaev18011280m.g	chr2L	2571492	2571533	-	unique
pA_chr6L-12	Xelaev18032489m.g	chr6L	153022657	153022698	+	unique
pA_chr8S-23	Xelaev18042225m.g	chr8S	66021985	66022026	+	unique
pA_chr4S-35	Xelaev18025548m.g	chr4S	87978578	87978619	-	unique
pA_chr5S-20	Xelaev18028917m.g	chr5S	33234815	33234856	-	unique
pA_chr9_10L-27	Xelaev18043657m.g	chr9_10L	18665681	18665722	-	unique
pA_chr5L-10	Xelaev18028227m.g	chr5L	151150912	151150953	+	unique
pA_chr9_10S-67	Xelaev18046895m.g	chr9_10S	40762035	40762076	+	unique
pA_chr9_10L-93	Xelaev18043051m.g	chr9_10L	54955	54996	-	unique
pA_chr8L-29	Xelaev18040086m.g	chr8L	94423871	94423912	+	unique
pA_chr4S-20	Xelaev18024408m.g	chr4S	10212361	10212402	+	unique
pA_chr2S-37	Xelaev18014544m.g	chr2S	31755226	31755267	+	unique
pA_chr2S-35	Xelaev18015506m.g	chr2S	92582217	92582258	-	unique
pA_chr1L-48	Xelaev18006517m.g	chr1L	106169213	106169254	+	unique
pA_chr8L-309	Xelaev18038736m.g	chr8L	24168703	24168744	-	unique
pA_chr6S-29	Xelaev18033577m.g	chr6S	81327992	81328033	+	unique
pA_chr8S-7	Xelaev18041060m.g	chr8S	3830856	3830897	+	unique
pA_chr3L-56	Xelaev18019680m.g	chr3L	144149716	144149757	+	unique
pA_chr9_10S-117	Xelaev18046866m.g	chr9_10S	40005879	40005920	+	unique
pA_chr9_10S-79	Xelaev18047430m.g	chr9_10S	76235377	76235418	-	unique
pA_chr3L-58	Xelaev18018541m.g	chr3L	114422726	114422767	-	unique
pA_chr1L-132	Xelaev18004853m.g	chr1L	5174050	5174091	+	unique
pA_chr2L-59	Xelaev18013114m.g	chr2L	119944939	119944980	-	unique
pA_chr6L-135	Xelaev18030531m.g	chr6L	3571542	3571583	-	unique
pA_chr2L-47	Xelaev18012403m.g	chr2L	76928110	76928151	+	unique
pA_chr6L-47	Xelaev18031829m.g	chr6L	103298750	103298791	-	unique
pA_chr7L-25	Xelaev18035945m.g	chr7L	101024956	101024997	-	unique
pA_chr3L-152	Xelaev18017652m.g	chr3L	60013714	60013755	+	unique
pA_chr7L-38	Xelaev18035740m.g	chr7L	90342512	90342553	+	unique
pA_chr7L-231	Xelaev18036268m.g	chr7L	115913529	115913570	-	unique
pA_chr3L-21	Xelaev18019208m.g	chr3L	136344192	136344233	+	unique
pA_chr5L-72	Xelaev18026704m.g	chr5L	43726925	43726966	-	unique
pA_chr1L-13	Xelaev18006105m.g	chr1L	89825107	89825148	+	unique
pA_chr6L-105	Xelaev18030691m.g	chr6L	14622720	14622761	-	unique
pA_chr2L-209	Xelaev18013176m.g	chr2L	125018535	125018576	+	unique
pA_chr1L-4	Xelaev18005417m.g	chr1L	43568161	43568202	+	unique
pA_chr2S-145	Xelaev18015372m.g	chr2S	80902053	80902094	-	unique
pA_chr2S-81	Xelaev18015799m.g	chr2S	117778553	117778594	+	unique
pA_chr1L-20	Xelaev18005131m.g	chr1L	19443564	19443605	-	unique
pA_chr4L-6	Xelaev18023356m.g	chr4L	96511190	96511231	+	unique
pA_chr1S-19	Xelaev18010866m.g	chr1S	154819651	154819692	-	unique
pA_chr4L-223	Xelaev18023821m.g	chr4L	119861349	119861390	-	unique
pA_chr9_10S-59	Xelaev18046673m.g	chr9_10S	32719335	32719376	+	unique
pA_chr5S-28	Xelaev18029621m.g	chr5S	85641242	85641283	-	unique
pA_chr7L-34	Xelaev18036122m.g	chr7L	108625556	108625597	+	unique
pA_chr4L-79	Xelaev18023090m.g	chr4L	80700073	80700114	-	unique
pA_chr8L-84	Xelaev18040083m.g	chr8L	94357885	94357926	+	unique
pA_chr1S-37	Xelaev18009660m.g	chr1S	78768576	78768617	+	unique
pA_chr1S-68	Xelaev18009381m.g	chr1S	59160732	59160773	-	unique
pA_chr1S-49	Xelaev18010496m.g	chr1S	126046550	126046591	+	unique
pA_chr8L-14	Xelaev18039070m.g	chr8L	49538012	49538053	-	unique
pA_chr3L-167	Xelaev18018654m.g	chr3L	119606236	119606277	+	unique
pA_chr4L-12	Xelaev18021990m.g	chr4L	15135938	15135979	+	unique
pA_chr1L-67	Xelaev18007547m.g	chr1L	151233365	151233406	-	unique
pA_chr2L-7	Xelaev18012630m.g	chr2L	88778621	88778662	-	unique
pA_chr9_10S-3	Xelaev18046700m.g	chr9_10S	33437022	33437063	+	unique
pA_chr2L-38	Xelaev18013533m.g	chr2L	146467048	146467089	-	unique
pA_chr1L-97	Xelaev18005217m.g	chr1L	28158982	28159023	-	unique
pA_chr7L-48	Xelaev18035128m.g	chr7L	55892433	55892474	+	unique
pA_chr9_10S-81	Xelaev18047795m.g	chr9_10S	99497596	99497637	-	unique
pA_chr4L-195	Xelaev18023406m.g	chr4L	99259762	99259803	+	unique
pA_chr8S-28	Xelaev18042753m.g	chr8S	91960619	91960660	-	unique
pA_chr1S-21	Xelaev18009841m.g	chr1S	87520350	87520391	+	unique
pA_chr3L-30	Xelaev18019097m.g	chr3L	133302763	133302804	+	unique
pA_chr1L-561	Xelaev18005620m.g	chr1L	59789443	59789484	+	unique
pA_chr3L-47	Xelaev18019354m.g	chr3L	139181421	139181462	-	unique
pA_chr5L-77	Xelaev18027711m.g	chr5L	115754460	115754501	+	unique
pA_chr5L-4	Xelaev18028022m.g	chr5L	137153633	137153674	+	unique
pA_chr1S-27	Xelaev18010167m.g	chr1S	110638329	110638370	-	unique
pA_chr7S-63	Xelaev18037714m.g	chr7S	74280189	74280230	-	unique
pA_chr4L-80	Xelaev18023463m.g	chr4L	103309298	103309339	-	unique
pA_chr3S-9	Xelaev18021366m.g	chr3S	98818813	98818854	+	unique
pA_chr3L-92	Xelaev18017379m.g	chr3L	42041016	42041057	+	unique
pA_chr4L-66	Xelaev18022897m.g	chr4L	66985505	66985546	-	unique
pA_chr6S-31	Xelaev18033057m.g	chr6S	32570087	32570128	+	unique
pA_chr1L-19	Xelaev18006987m.g	chr1L	136107305	136107346	+	unique
pA_chr8L-5	Xelaev18038859m.g	chr8L	36774957	36774998	+	unique
pA_chr8L-24	Xelaev18039013m.g	chr8L	47469679	47469720	+	unique
pA_chr2S-5	Xelaev18016234m.g	chr2S	140935687	140935728	-	unique
pA_chr3S-66	Xelaev18021535m.g	chr3S	114168622	114168663	-	unique
pA_chr1L-60	Xelaev18007695m.g	chr1L	154376408	154376449	+	unique
pA_chr3L-33	Xelaev18018243m.g	chr3L	94812005	94812046	+	unique
pA_chr7L-21	Xelaev18034356m.g	chr7L	6540927	6540968	-	unique
pA_chr2S-31	Xelaev18015309m.g	chr2S	77169293	77169334	-	unique
pA_chr4L-20	Xelaev18022796m.g	chr4L	63293234	63293275	+	unique
pA_chr1L-34	Xelaev18005305m.g	chr1L	33446153	33446194	+	unique
pA_chr1S-32	Xelaev18009329m.g	chr1S	55105352	55105393	+	unique
pA_chr1S-80	Xelaev18011128m.g	chr1S	175130922	175130963	+	unique
pA_chr7L-23	Xelaev18034687m.g	chr7L	27294907	27294948	+	unique
pA_chr8S-14	Xelaev18041434m.g	chr8S	26944677	26944718	-	unique
pA_chr9_10S-58	Xelaev18046530m.g	chr9_10S	26444757	26444798	+	unique
pA_chr2S-18	Xelaev18016113m.g	chr2S	132083139	132083180	-	unique
pA_chr4S-27	Xelaev18024255m.g	chr4S	2794089	2794130	+	unique
pA_chr7L-56	Xelaev18035591m.g	chr7L	83592049	83592090	+	unique
pA_chr4S-23	Xelaev18024267m.g	chr4S	3152320	3152361	+	unique
pA_chr9_10S-275	Xelaev18047425m.g	chr9_10S	76142458	76142499	+	unique
pA_chr7S-9	Xelaev18037099m.g	chr7S	28491249	28491290	-	unique
pA_chr6L-22	Xelaev18030886m.g	chr6L	31235477	31235518	-	unique
pA_chr9_10S-8	Xelaev18047582m.g	chr9_10S	87594943	87594984	-	unique
pA_chr7L-44	Xelaev18034598m.g	chr7L	20418602	20418643	-	unique
pA_chr2L-66	Xelaev18013932m.g	chr2L	172553779	172553820	+	unique
pA_chr7S-37	Xelaev18037678m.g	chr7S	72274647	72274688	+	unique
pA_chr7S-84	Xelaev18037431m.g	chr7S	54775073	54775114	-	unique
pA_chr1L-131	Xelaev18008489m.g	chr1L	211670760	211670801	+	unique
pA_chr5S-29	Xelaev18030214m.g	chr5S	131967176	131967217	-	unique
pA_chr2L-57	Xelaev18012218m.g	chr2L	63819398	63819439	+	unique
pA_chr3L-54	Xelaev18018776m.g	chr3L	123118427	123118468	-	unique
pA_chr5L-32	Xelaev18026933m.g	chr5L	60476175	60476216	-	unique
pA_chr2L-215	Xelaev18011433m.g	chr2L	10915133	10915174	+	unique
pA_chr7S-39	Xelaev18036889m.g	chr7S	15938493	15938534	-	unique
pA_chr8S-152	Xelaev18041802m.g	chr8S	39924935	39924976	+	unique
pA_chr8L-81	Xelaev18038978m.g	chr8L	45444214	45444255	+	unique
pA_chr1L-17	Xelaev18005127m.g	chr1L	19204365	19204406	-	unique
pA_chr3L-27	Xelaev18019201m.g	chr3L	136207458	136207499	+	unique
pA_chr2S-16	Xelaev18015087m.g	chr2S	63929377	63929418	+	unique
pA_chr2S-83	Xelaev18016520m.g	chr2S	158465684	158465725	-	unique
pA_chr9_10S-141	Xelaev18046612m.g	chr9_10S	29803944	29803985	+	unique
pA_chr9_10S-13	Xelaev18047490m.g	chr9_10S	79848724	79848765	-	unique
pA_chr8L-142	Xelaev18040366m.g	chr8L	103539990	103540031	+	unique
pA_chr3L-44	Xelaev18018083m.g	chr3L	84741248	84741289	-	unique
pA_chr2L-70	Xelaev18013400m.g	chr2L	139950755	139950796	-	unique
pA_chr2L-31	Xelaev18013202m.g	chr2L	127159014	127159055	+	unique
pA_chr7S-8	Xelaev18037286m.g	chr7S	43695786	43695827	+	unique
pA_chr9_10S-84	Xelaev18046508m.g	chr9_10S	25530895	25530936	-	unique
pA_chr5L-100	Xelaev18027573m.g	chr5L	107412397	107412438	-	unique
pA_chr5L-44	Xelaev18027586m.g	chr5L	108249842	108249883	+	unique
pA_chr2L-24	Xelaev18012860m.g	chr2L	103333570	103333611	-	unique
pA_chr3L-72	Xelaev18017717m.g	chr3L	65813127	65813168	-	unique
pA_chr7S-13	Xelaev18036709m.g	chr7S	4546737	4546778	-	unique
pA_chr1L-11	Xelaev18005920m.g	chr1L	79877063	79877104	+	unique
pA_chr9_10L-185	Xelaev18043589m.g	chr9_10L	17494806	17494847	+	unique
pA_chr2S-38	Xelaev18015260m.g	chr2S	73823990	73824031	-	unique
pA_chr3S-10	Xelaev18020901m.g	chr3S	65274651	65274692	+	unique
pA_chr2S-129	Xelaev18015782m.g	chr2S	116799069	116799110	-	unique
pA_chr4S-147	Xelaev18025347m.g	chr4S	74330478	74330519	-	unique
pA_chr2L-90	Xelaev18012771m.g	chr2L	96170763	96170804	-	unique
pA_chr9_10S-65	Xelaev18046520m.g	chr9_10S	26200956	26200997	+	unique
pA_chr4L-27	Xelaev18023945m.g	chr4L	126198636	126198677	+	unique
pA_chr1S-173	Xelaev18009454m.g	chr1S	65206311	65206352	+	unique
pA_chr2L-46	Xelaev18013297m.g	chr2L	136413521	136413562	-	unique
pA_chr4S-47	Xelaev18025207m.g	chr4S	65042287	65042328	-	unique
pA_chr3L-66	Xelaev18017402m.g	chr3L	43093070	43093111	+	unique
pA_chr1S-148	Xelaev18008780m.g	chr1S	4657826	4657867	-	unique
pA_chr6L-44	Xelaev18031038m.g	chr6L	43515540	43515581	-	unique
pA_chr1L-126	Xelaev18006666m.g	chr1L	112406137	112406178	+	unique
pA_chr4L-10	Xelaev18023118m.g	chr4L	82705108	82705149	+	unique
pA_chr5L-23	Xelaev18027096m.g	chr5L	71796935	71796976	+	unique
pA_chr2S-201	Xelaev18014343m.g	chr2S	22225628	22225669	-	unique
pA_chr3S-36	Xelaev18020426m.g	chr3S	35835741	35835782	+	unique
pA_chr9_10S-19	Xelaev18046892m.g	chr9_10S	40570474	40570515	-	unique
pA_chr7S-14	Xelaev18038075m.g	chr7S	89503834	89503875	-	unique
pA_chr8L-128	Xelaev18040359m.g	chr8L	103369889	103369930	+	unique
pA_chr7S-25	Xelaev18036802m.g	chr7S	8559217	8559258	+	unique
pA_chr9_10L-74	Xelaev18045624m.g	chr9_10L	113739891	113739932	-	unique
pA_chr1S-24	Xelaev18010191m.g	chr1S	113168079	113168120	+	unique
pA_chr8S-83	Xelaev18041358m.g	chr8S	25455743	25455784	+	unique
pA_chr5S-144	Xelaev18028809m.g	chr5S	26024907	26024948	-	unique
pA_chr3L-52	Xelaev18018617m.g	chr3L	118583615	118583656	+	unique
pA_chr1S-28	Xelaev18009635m.g	chr1S	77800728	77800769	+	unique
pA_chr1S-91	Xelaev18009829m.g	chr1S	87163508	87163549	-	unique
pA_chr4S-95	Xelaev18024869m.g	chr4S	39643676	39643717	+	unique
pA_chr3L-387	Xelaev18017565m.g	chr3L	52771581	52771622	-	unique
pA_chr9_10L-54	Xelaev18043110m.g	chr9_10L	1103646	1103687	+	unique
pA_chr5L-17	Xelaev18026456m.g	chr5L	25536282	25536323	+	unique
pA_chr6L-28	Xelaev18032032m.g	chr6L	116535474	116535515	-	unique
pA_chr7L-5	Xelaev18034537m.g	chr7L	14469679	14469720	+	unique
pA_chr3S-32	Xelaev18019895m.g	chr3S	6907469	6907510	-	unique
pA_chr9_10L-47	Xelaev18044358m.g	chr9_10L	46021310	46021351	-	unique
pA_chr3L-75	Xelaev18018645m.g	chr3L	119288620	119288661	+	unique
pA_chr7L-28	Xelaev18035398m.g	chr7L	73529827	73529868	-	unique
pA_chr2L-45	Xelaev18013263m.g	chr2L	134539997	134540038	-	unique
pA_chr5L-269	Xelaev18027199m.g	chr5L	79242831	79242872	-	unique
pA_chr2L-144	Xelaev18013609m.g	chr2L	150114839	150114880	-	unique
pA_chr2S-102	Xelaev18015791m.g	chr2S	117464743	117464784	-	unique
pA_chr7L-35	Xelaev18034244m.g	chr7L	2631284	2631325	-	unique
pA_chr9_10L-197	Xelaev18043856m.g	chr9_10L	29969535	29969576	+	unique
pA_chr2L-23	Xelaev18012689m.g	chr2L	92104714	92104755	+	unique
pA_chr4S-133	Xelaev18024969m.g	chr4S	47905892	47905933	+	unique
pA_chr8S-41	Xelaev18041356m.g	chr8S	25400469	25400510	+	unique
pA_chr1L-16	Xelaev18008125m.g	chr1L	185475250	185475291	+	unique
pA_chr5L-104	Xelaev18026299m.g	chr5L	17342325	17342366	-	unique
pA_chr6L-64	Xelaev18030630m.g	chr6L	8717461	8717502	+	unique
pA_chr9_10S-37	Xelaev18047433m.g	chr9_10S	76421958	76421999	+	unique
pA_chr3L-130	Xelaev18019123m.g	chr3L	134034272	134034313	-	unique
pA_chr8L-82	Xelaev18039446m.g	chr8L	59860749	59860790	+	unique
pA_chr4L-48	Xelaev18022568m.g	chr4L	42792956	42792997	+	unique
pA_chr1S-149	Xelaev18009272m.g	chr1S	48474415	48474456	-	unique
pA_chr4S-62	Xelaev18025705m.g	chr4S	95514612	95514653	-	unique
pA_chr9_10L-167	Xelaev18044294m.g	chr9_10L	44350528	44350569	-	unique
pA_chr1L-197	Xelaev18006841m.g	chr1L	126297758	126297799	+	unique
pA_chr2L-136	Xelaev18013931m.g	chr2L	172519677	172519718	+	unique
pA_chr5L-68	Xelaev18027867m.g	chr5L	125668684	125668725	+	unique
pA_chr3S-6	Xelaev18020179m.g	chr3S	22449203	22449244	+	unique
pA_chr4S-148	Xelaev18025450m.g	chr4S	80938839	80938880	+	unique
pA_chr9_10S-167	Xelaev18046375m.g	chr9_10S	17221173	17221214	+	unique
pA_chr6L-65	Xelaev18030727m.g	chr6L	19370893	19370934	+	unique
pA_chr9_10L-37	Xelaev18044150m.g	chr9_10L	39472186	39472227	-	unique
pA_chr1L-110	Xelaev18005076m.g	chr1L	16197659	16197700	-	unique
pA_chr6S-5	Xelaev18033544m.g	chr6S	78323625	78323666	+	unique
pA_chr1L-251	Xelaev18008108m.g	chr1L	184453518	184453559	+	unique
pA_chr2S-25	Xelaev18016414m.g	chr2S	155709508	155709549	+	unique
pA_chr5L-26	Xelaev18028440m.g	chr5L	158839294	158839335	-	unique
pA_chr1L-121	Xelaev18005062m.g	chr1L	14551682	14551723	+	unique
pA_chr5S-60	Xelaev18029873m.g	chr5S	106525265	106525306	+	unique
pA_chr3S-13	Xelaev18020633m.g	chr3S	50731539	50731580	+	unique
pA_chr4S-39	Xelaev18025319m.g	chr4S	72124193	72124234	-	unique
pA_chr6S-24	Xelaev18032951m.g	chr6S	23439846	23439887	+	unique
pA_chr4S-54	Xelaev18025038m.g	chr4S	51775432	51775473	+	unique
pA_chr4S-80	Xelaev18025804m.g	chr4S	100753590	100753631	-	unique
pA_chr6S-57	Xelaev18033740m.g	chr6S	93330001	93330042	+	unique
pA_chr7S-117	Xelaev18036916m.g	chr7S	18125162	18125203	+	unique
pA_chr4S-180	Xelaev18025574m.g	chr4S	88638166	88638207	-	unique
pA_chr1L-71	Xelaev18005235m.g	chr1L	28836476	28836517	+	unique
pA_chr1S-40	Xelaev18010011m.g	chr1S	96516268	96516309	+	unique
pA_chr1L-49	Xelaev18006844m.g	chr1L	126364082	126364123	-	unique
pA_chr8L-149	Xelaev18038554m.g	chr8L	16201385	16201426	-	unique
pA_chr6S-12	Xelaev18033015m.g	chr6S	29426693	29426734	-	unique
pA_chr4L-11	Xelaev18023660m.g	chr4L	113408580	113408621	-	unique
pA_chr8S-36	Xelaev18041863m.g	chr8S	42897742	42897783	+	unique
pA_chr9_10L-35	Xelaev18044966m.g	chr9_10L	81133459	81133500	+	unique
pA_chr2L-102	Xelaev18013869m.g	chr2L	168310388	168310429	+	unique
pA_chr2L-110	Xelaev18012883m.g	chr2L	104467025	104467066	-	unique
pA_chr6L-31	Xelaev18031890m.g	chr6L	108002428	108002469	+	unique
pA_chr2L-54	Xelaev18013263m.g	chr2L	134539601	134539642	-	unique
pA_chr1S-25	Xelaev18010463m.g	chr1S	125117876	125117917	-	unique
pA_chr2S-52	Xelaev18016521m.g	chr2S	158480466	158480507	-	unique
pA_chr8S-61	Xelaev18041273m.g	chr8S	19006485	19006526	-	unique
pA_chr2L-22	Xelaev18013788m.g	chr2L	161697434	161697475	-	unique
pA_chr1S-17	Xelaev18009263m.g	chr1S	47488916	47488957	-	unique
pA_chr4L-205	Xelaev18022124m.g	chr4L	22008285	22008326	+	unique
pA_chr6L-37	Xelaev18032329m.g	chr6L	140088269	140088310	-	unique
pA_chr5S-68	Xelaev18029349m.g	chr5S	66447866	66447907	+	unique
pA_chr8S-29	Xelaev18042638m.g	chr8S	85944770	85944811	+	unique
pA_chr2S-89	Xelaev18016014m.g	chr2S	128312986	128313027	-	unique
pA_chr1L-75	Xelaev18006612m.g	chr1L	110480944	110480985	-	unique
pA_chr3L-45	Xelaev18018083m.g	chr3L	84741344	84741385	-	unique
pA_chr3S-18	Xelaev18020735m.g	chr3S	57289618	57289659	+	unique
pA_chr9_10L-224	Xelaev18044892m.g	chr9_10L	76893315	76893356	-	unique
pA_chr1L-27	Xelaev18007986m.g	chr1L	173659992	173660033	+	unique
pA_chr3L-62	Xelaev18017000m.g	chr3L	19839473	19839514	+	unique
pA_chr4L-28	Xelaev18023446m.g	chr4L	102340219	102340260	-	unique
pA_chr6S-46	Xelaev18033896m.g	chr6S	106826114	106826155	+	unique
pA_chr1S-222	Xelaev18008815m.g	chr1S	6738083	6738124	+	unique
pA_chr2L-61	Xelaev18012591m.g	chr2L	87442338	87442379	-	unique
pA_chr2L-30	Xelaev18013762m.g	chr2L	159294290	159294331	-	unique
pA_chr6L-33	Xelaev18031018m.g	chr6L	41145993	41146034	-	unique
pA_chr4L-76	Xelaev18022776m.g	chr4L	61240144	61240185	-	unique
pA_chr6L-38	Xelaev18030897m.g	chr6L	31958737	31958778	-	unique
pA_chr7L-33	Xelaev18034459m.g	chr7L	10369310	10369351	-	unique
pA_chr1S-15	Xelaev18009673m.g	chr1S	79409685	79409726	-	unique
pA_chr8S-15	Xelaev18041382m.g	chr8S	25923423	25923464	-	unique
pA_chr1L-30	Xelaev18006229m.g	chr1L	96261611	96261652	+	unique
pA_chr3L-169	Xelaev18019083m.g	chr3L	133077863	133077904	+	unique
pA_chr7L-85	Xelaev18034467m.g	chr7L	11024601	11024642	-	unique
pA_chr1S-121	Xelaev18008835m.g	chr1S	9354391	9354432	-	unique
pA_chr2S-21	Xelaev18015189m.g	chr2S	68977744	68977785	-	unique
pA_chr4S-29	Xelaev18025187m.g	chr4S	64410943	64410984	-	unique
pA_chr2S-26	Xelaev18015851m.g	chr2S	119880964	119881005	-	unique
pA_chr4S-176	Xelaev18025135m.g	chr4S	59816957	59816998	-	unique
pA_chr3S-73	Xelaev18020203m.g	chr3S	23352535	23352576	-	unique
pA_chr4S-50	Xelaev18025877m.g	chr4S	105596096	105596137	-	unique
pA_chr9_10L-86	Xelaev18045175m.g	chr9_10L	91173788	91173829	+	unique
pA_chr2L-74	Xelaev18011267m.g	chr2L	2106039	2106080	+	unique
pA_chr8S-27	Xelaev18042408m.g	chr8S	77864250	77864291	-	unique
pA_chr1L-180	Xelaev18005530m.g	chr1L	52185441	52185482	+	unique
pA_chr6L-49	Xelaev18030827m.g	chr6L	26444215	26444256	-	unique
pA_chr8S-42	Xelaev18041887m.g	chr8S	44111203	44111244	+	unique
pA_chr8S-9	Xelaev18042855m.g	chr8S	95979930	95979971	+	unique
pA_chr2L-118	Xelaev18012490m.g	chr2L	81202625	81202666	-	unique
pA_chr6L-62	Xelaev18031704m.g	chr6L	92199979	92200020	-	unique
pA_chr8L-40	Xelaev18039133m.g	chr8L	50804053	50804094	-	unique
pA_chr2L-65	Xelaev18013890m.g	chr2L	170542853	170542894	+	unique
pA_chr5L-127	Xelaev18026704m.g	chr5L	43726530	43726571	-	unique
pA_chr9_10S-63	Xelaev18046338m.g	chr9_10S	16607082	16607123	-	unique
pA_chr1L-178	Xelaev18005164m.g	chr1L	21866663	21866704	+	unique
pA_chr1L-12	Xelaev18007815m.g	chr1L	162779381	162779422	-	unique
pA_chr3L-222	Xelaev18017419m.g	chr3L	44344176	44344217	+	unique
pA_chr8L-80	Xelaev18038718m.g	chr8L	23805754	23805795	+	unique
pA_chr8L-43	Xelaev18039214m.g	chr8L	53224000	53224041	+	unique
pA_chr7L-70	Xelaev18036132m.g	chr7L	109102496	109102537	+	unique
pA_chr2S-308	Xelaev18014154m.g	chr2S	4102961	4103002	+	unique
pA_chr9_10L-61	Xelaev18043065m.g	chr9_10L	233177	233218	-	unique
pA_chr6L-124	Xelaev18032207m.g	chr6L	129040930	129040971	+	unique
pA_chr3L-168	Xelaev18018893m.g	chr3L	126135163	126135204	-	unique
pA_chr2S-70	Xelaev18015861m.g	chr2S	120182591	120182632	-	unique
pA_chr5S-57	Xelaev18028807m.g	chr5S	25972570	25972611	+	unique
pA_chr9_10S-29	Xelaev18045942m.g	chr9_10S	2207390	2207431	+	unique
pA_chr3S-110	Xelaev18020155m.g	chr3S	21447317	21447358	+	unique
pA_chr4S-182	Xelaev18024243m.g	chr4S	2421712	2421753	+	unique
pA_chr3L-71	Xelaev18017608m.g	chr3L	56209379	56209420	+	unique
pA_chr2S-287	Xelaev18014901m.g	chr2S	56708157	56708198	-	unique
pA_chr5S-84	Xelaev18029517m.g	chr5S	78950447	78950488	-	unique
pA_chr2L-311	Xelaev18011433m.g	chr2L	10914631	10914672	+	unique
pA_chr8L-55	Xelaev18039232m.g	chr8L	53650091	53650132	+	unique
pA_chr2S-165	Xelaev18014577m.g	chr2S	33905394	33905435	+	unique
pA_chr4S-11	Xelaev18024337m.g	chr4S	6720906	6720947	+	unique
pA_chr5L-73	Xelaev18026448m.g	chr5L	24273726	24273767	+	unique
pA_chr9_10L-121	Xelaev18043180m.g	chr9_10L	2447028	2447069	-	unique
pA_chr1S-11	Xelaev18008962m.g	chr1S	20124719	20124760	-	unique
pA_chr4S-48	Xelaev18025290m.g	chr4S	70960328	70960369	-	unique
pA_chr4L-43	Xelaev18022964m.g	chr4L	72924377	72924418	-	unique
pA_chr1S-86	Xelaev18010362m.g	chr1S	118370381	118370422	-	unique
pA_chr5S-19	Xelaev18028551m.g	chr5S	6776074	6776115	-	unique
pA_chr4S-21	Xelaev18024217m.g	chr4S	1843308	1843349	+	unique
pA_chr2L-49	Xelaev18014052m.g	chr2L	178319182	178319223	+	unique
pA_chr3L-160	Xelaev18017427m.g	chr3L	44955796	44955837	+	unique
pA_chr2L-89	Xelaev18012634m.g	chr2L	88905425	88905466	+	unique
pA_chr3L-159	Xelaev18017104m.g	chr3L	24279815	24279856	-	unique
pA_chr3L-150	Xelaev18019667m.g	chr3L	143977522	143977563	-	unique
pA_chr6L-24	Xelaev18031045m.g	chr6L	44501691	44501732	+	unique
pA_chr7L-57	Xelaev18035648m.g	chr7L	86901716	86901757	+	unique
pA_chr5S-49	Xelaev18028917m.g	chr5S	33235147	33235188	-	unique
pA_chr9_10L-57	Xelaev18043132m.g	chr9_10L	1423222	1423263	+	unique
pA_chr9_10S-14	Xelaev18046262m.g	chr9_10S	15085796	15085837	+	unique
pA_chr8L-9	Xelaev18038655m.g	chr8L	21857752	21857793	-	unique
pA_chr8L-73	Xelaev18039309m.g	chr8L	56336813	56336854	+	unique
pA_chr7S-16	Xelaev18036978m.g	chr7S	22049728	22049769	-	unique
pA_chr2L-114	Xelaev18011221m.g	chr2L	1000470	1000511	+	unique
pA_chr2L-12	Xelaev18012932m.g	chr2L	108781229	108781270	-	unique
pA_chr9_10L-14	Xelaev18044744m.g	chr9_10L	68201792	68201833	+	unique
pA_chr1L-133	Xelaev18005156m.g	chr1L	21280890	21280931	+	unique
pA_chr1L-14	Xelaev18007598m.g	chr1L	152394230	152394271	+	unique
pA_chr1S-44	Xelaev18010459m.g	chr1S	125110697	125110738	+	unique
pA_chr9_10S-10	Xelaev18046456m.g	chr9_10S	22834884	22834925	-	unique
pA_chr1L-46	Xelaev18006289m.g	chr1L	98371795	98371836	+	unique
pA_chr1S-237	Xelaev18010734m.g	chr1S	140483311	140483352	-	unique
pA_chr8S-73	Xelaev18041928m.g	chr8S	47188535	47188576	-	unique
pA_chr9_10L-28	Xelaev18045435m.g	chr9_10L	105667833	105667874	-	unique
pA_chr4S-44	Xelaev18024466m.g	chr4S	13522830	13522871	+	unique
pA_chr2L-127	Xelaev18011926m.g	chr2L	47888472	47888513	+	unique
pA_chr4L-17	Xelaev18022759m.g	chr4L	60137263	60137304	-	unique
pA_chr5L-70	Xelaev18026282m.g	chr5L	17063988	17064029	+	unique
pA_chr7L-116	Xelaev18034818m.g	chr7L	35348186	35348227	-	unique
pA_chr1L-37	Xelaev18007056m.g	chr1L	138584537	138584578	-	unique
pA_chr1L-453	Xelaev18005238m.g	chr1L	29213544	29213585	+	unique
pA_chr3L-102	Xelaev18017941m.g	chr3L	79838682	79838723	+	unique
pA_chr6L-36	Xelaev18031782m.g	chr6L	99322670	99322711	+	unique
pA_chr1S-48	Xelaev18009547m.g	chr1S	71838972	71839013	+	unique
pA_chr9_10S-52	Xelaev18047503m.g	chr9_10S	81820396	81820437	-	unique
pA_chr4L-292	Xelaev18022115m.g	chr4L	21767070	21767111	+	unique
pA_chr7L-12	Xelaev18035919m.g	chr7L	99569230	99569271	+	unique
pA_chr2S-42	Xelaev18016091m.g	chr2S	131200283	131200324	-	unique
pA_chr6L-74	Xelaev18031327m.g	chr6L	64756187	64756228	+	unique
pA_chr2S-101	Xelaev18015177m.g	chr2S	67965134	67965175	-	unique
pA_chr4S-72	Xelaev18025375m.g	chr4S	76614098	76614139	+	unique
pA_chr2L-19	Xelaev18012537m.g	chr2L	84228396	84228437	-	unique
pA_chr3L-35	Xelaev18019533m.g	chr3L	141799113	141799154	+	unique
pA_chr1S-171	Xelaev18009259m.g	chr1S	47380032	47380073	-	unique
pA_chr4S-41	Xelaev18025687m.g	chr4S	94963757	94963798	-	unique
pA_chr7S-47	Xelaev18037495m.g	chr7S	61085104	61085145	+	unique
pA_chr2S-75	Xelaev18016561m.g	chr2S	159395189	159395230	+	unique
pA_chr8S-10	Xelaev18042326m.g	chr8S	75111821	75111862	-	unique
pA_chr7L-14	Xelaev18035188m.g	chr7L	58807601	58807642	+	unique
pA_chr2S-92	Xelaev18015075m.g	chr2S	63435400	63435441	-	unique
pA_chr1S-272	Xelaev18010774m.g	chr1S	145141355	145141396	-	unique
pA_chr6L-162	Xelaev18031641m.g	chr6L	88994649	88994690	+	unique
pA_chr3S-5	Xelaev18019746m.g	chr3S	1996453	1996494	-	unique
pA_chr7S-44	Xelaev18037562m.g	chr7S	64787562	64787603	+	unique
pA_chr4S-109	Xelaev18024187m.g	chr4S	1145591	1145632	+	unique
pA_chr8S-46	Xelaev18041822m.g	chr8S	40362168	40362209	-	unique
pA_chr1L-89	Xelaev18007803m.g	chr1L	162496503	162496544	+	unique
pA_chr5L-114	Xelaev18028391m.g	chr5L	157512418	157512459	-	unique
pA_chr6L-96	Xelaev18030757m.g	chr6L	21697237	21697278	+	unique
pA_chr8L-122	Xelaev18039817m.g	chr8L	80107539	80107580	-	unique
pA_chr8L-57	Xelaev18040755m.g	chr8L	116109383	116109424	+	unique
pA_chr2L-92	Xelaev18012890m.g	chr2L	104915562	104915603	-	unique
pA_chr3L-157	Xelaev18019676m.g	chr3L	144092101	144092142	+	unique
pA_chr4L-224	Xelaev18023973m.g	chr4L	127835269	127835310	-	unique
pA_chr2S-91	Xelaev18015005m.g	chr2S	60553277	60553318	+	unique
pA_chr8S-207	Xelaev18041615m.g	chr8S	32246648	32246689	+	unique
pA_chr2L-186	Xelaev18011623m.g	chr2L	28752810	28752851	-	unique
pA_chr2L-117	Xelaev18012147m.g	chr2L	59952342	59952383	+	unique
pA_chr1S-46	Xelaev18010763m.g	chr1S	144163355	144163396	+	unique
pA_chr2S-39	Xelaev18016071m.g	chr2S	130405879	130405920	-	unique
pA_chr3S-49	Xelaev18021032m.g	chr3S	75802225	75802266	-	unique
pA_chr3S-53	Xelaev18021206m.g	chr3S	88655825	88655866	+	unique
pA_chr4S-45	Xelaev18025280m.g	chr4S	70522357	70522398	+	unique
pA_chr1L-113	Xelaev18006983m.g	chr1L	135847233	135847274	-	unique
pA_chr4L-29	Xelaev18023049m.g	chr4L	78007492	78007533	+	unique
pA_chr2S-65	Xelaev18016369m.g	chr2S	152918365	152918406	+	unique
pA_chr3S-20	Xelaev18021532m.g	chr3S	114085534	114085575	+	unique
pA_chr1L-72	Xelaev18005389m.g	chr1L	38687931	38687972	+	unique
pA_chr1L-87	Xelaev18005529m.g	chr1L	52138832	52138873	-	unique
pA_chr8L-200	Xelaev18039071m.g	chr8L	49602730	49602771	+	unique
pA_chr5S-190	Xelaev18028608m.g	chr5S	10713422	10713463	+	unique
pA_chr1L-76	Xelaev18006647m.g	chr1L	111409635	111409676	-	unique
pA_chr2L-20	Xelaev18012593m.g	chr2L	87485621	87485662	-	unique
pA_chr6L-95	Xelaev18032230m.g	chr6L	130497302	130497343	+	unique
pA_chr8L-406	Xelaev18039273m.g	chr8L	55300383	55300424	-	unique
pA_chr4S-73	Xelaev18025453m.g	chr4S	81070984	81071025	+	unique
pA_chr9_10L-117	Xelaev18044939m.g	chr9_10L	79292046	79292087	-	unique
pA_chr1L-52	Xelaev18008613m.g	chr1L	218838343	218838384	-	unique
pA_chr4L-127	Xelaev18021982m.g	chr4L	14706651	14706692	+	unique
pA_chr5L-21	Xelaev18027898m.g	chr5L	127101083	127101124	-	unique
pA_chr1L-165	Xelaev18005850m.g	chr1L	75955689	75955730	-	unique
pA_chr3L-522	Xelaev18018324m.g	chr3L	98576191	98576232	+	unique
pA_chr4L-87	Xelaev18023987m.g	chr4L	129445305	129445346	+	unique
pA_chr9_10L-63	Xelaev18043501m.g	chr9_10L	13885860	13885901	+	unique
pA_chr3L-65	Xelaev18018208m.g	chr3L	92474526	92474567	+	unique
pA_chr4L-25	Xelaev18021975m.g	chr4L	13588606	13588647	+	unique
pA_chr8L-46	Xelaev18039104m.g	chr8L	50225508	50225549	-	unique
pA_chr8L-47	Xelaev18039592m.g	chr8L	66787516	66787557	+	unique
pA_chr2S-41	Xelaev18015884m.g	chr2S	120901038	120901079	-	unique
pA_chr2S-45	Xelaev18015980m.g	chr2S	125891666	125891707	+	unique
pA_chr9_10L-455	Xelaev18044612m.g	chr9_10L	60834607	60834648	+	unique
pA_chr2S-67	Xelaev18014222m.g	chr2S	8173076	8173117	-	unique
pA_chr6S-97	Xelaev18033282m.g	chr6S	52448434	52448475	+	unique
pA_chr6S-110	Xelaev18034091m.g	chr6S	126933306	126933347	+	unique
pA_chr9_10L-53	Xelaev18045199m.g	chr9_10L	92719498	92719539	-	unique
pA_chr3L-272	Xelaev18017780m.g	chr3L	68646571	68646612	-	unique
pA_chr7L-45	Xelaev18036397m.g	chr7L	119996851	119996892	-	unique
pA_chr2L-98	Xelaev18012105m.g	chr2L	58536638	58536679	-	unique
pA_chr1L-402	Xelaev18004815m.g	chr1L	2896757	2896798	-	unique
pA_chr1L-156	Xelaev18006393m.g	chr1L	102065818	102065859	+	unique
pA_chr6L-84	Xelaev18032306m.g	chr6L	138528802	138528843	-	unique
pA_chr8L-83	Xelaev18039931m.g	chr8L	85581290	85581331	+	unique
pA_chr2S-63	Xelaev18014960m.g	chr2S	58918369	58918410	-	unique
pA_chr3S-15	Xelaev18019996m.g	chr3S	12604284	12604325	+	unique
pA_chr2L-86	Xelaev18012722m.g	chr2L	93523131	93523172	+	unique
pA_chr3S-123	Xelaev18020526m.g	chr3S	44506542	44506583	-	unique
pA_chr8S-171	Xelaev18042337m.g	chr8S	75581446	75581487	-	unique
pA_chr9_10L-8	Xelaev18043762m.g	chr9_10L	24022228	24022269	-	unique
pA_chr4L-22	Xelaev18023531m.g	chr4L	107254891	107254932	-	unique
pA_chr1S-87	Xelaev18010609m.g	chr1S	133866237	133866278	-	unique
pA_chr1S-10	Xelaev18011037m.g	chr1S	168851196	168851237	-	unique
pA_chr4S-14	Xelaev18025163m.g	chr4S	62730106	62730147	+	unique
pA_chr9_10S-36	Xelaev18046785m.g	chr9_10S	36810607	36810648	-	unique
pA_chr3S-54	Xelaev18021410m.g	chr3S	101490936	101490977	+	unique
pA_chr4S-71	Xelaev18025165m.g	chr4S	62770265	62770306	-	unique
pA_chr6S-37	Xelaev18033234m.g	chr6S	48002735	48002776	-	unique
pA_chr9_10S-83	Xelaev18047888m.g	chr9_10S	102086816	102086857	+	unique
pA_chr4S-28	Xelaev18024882m.g	chr4S	40164133	40164174	-	unique
pA_chr3L-67	Xelaev18019511m.g	chr3L	141478054	141478095	-	unique
pA_chr6L-106	Xelaev18030860m.g	chr6L	29261177	29261218	-	unique
pA_chr5S-51	Xelaev18030291m.g	chr5S	135174545	135174586	+	unique
pA_chr8S-17	Xelaev18042102m.g	chr8S	56484899	56484940	+	unique
pA_chr9_10L-198	Xelaev18044026m.g	chr9_10L	36122260	36122301	+	unique
pA_chr1L-96	Xelaev18005042m.g	chr1L	13526060	13526101	+	unique
pA_chr2L-21	Xelaev18012969m.g	chr2L	110504695	110504736	-	unique
pA_chr5L-161	Xelaev18027127m.g	chr5L	75250018	75250059	+	unique
pA_chr4S-64	Xelaev18024906m.g	chr4S	41551176	41551217	+	unique
pA_chr4S-25	Xelaev18025050m.g	chr4S	52333666	52333707	+	unique
pA_chr7S-29	Xelaev18036837m.g	chr7S	10924575	10924616	+	unique
pA_chr2L-60	Xelaev18012073m.g	chr2L	57625123	57625164	+	unique
pA_chr8L-63	Xelaev18039625m.g	chr8L	69361381	69361422	+	unique
pA_chr1S-26	Xelaev18008935m.g	chr1S	17362225	17362266	-	unique
pA_chr3S-58	Xelaev18021274m.g	chr3S	93924427	93924468	-	unique
pA_chr3L-34	Xelaev18017873m.g	chr3L	75328864	75328905	+	unique
pA_chr2L-69	Xelaev18013334m.g	chr2L	137561243	137561284	+	unique
pA_chr4L-8	Xelaev18023331m.g	chr4L	95048182	95048223	-	unique
pA_chr5L-45	Xelaev18027897m.g	chr5L	127086083	127086124	-	unique
pA_chr1S-29	Xelaev18010860m.g	chr1S	154655597	154655638	+	unique
pA_chr4L-129	Xelaev18022277m.g	chr4L	27304339	27304380	+	unique
pA_chr9_10L-32	Xelaev18043750m.g	chr9_10L	23636518	23636559	+	unique
pA_chr2S-51	Xelaev18016319m.g	chr2S	147447977	147448018	+	unique
pA_chr4S-86	Xelaev18025052m.g	chr4S	52335245	52335286	-	unique
pA_chr9_10L-95	Xelaev18043721m.g	chr9_10L	22095946	22095987	+	unique
pA_chr3L-232	Xelaev18018779m.g	chr3L	123279313	123279354	+	unique
pA_chr1S-120	Xelaev18011109m.g	chr1S	174165912	174165953	-	unique
pA_chr2S-109	Xelaev18016451m.g	chr2S	156645044	156645085	+	unique
pA_chr1L-146	Xelaev18006314m.g	chr1L	99215803	99215844	+	unique
pA_chr8S-94	Xelaev18041102m.g	chr8S	5989794	5989835	-	unique
pA_chr9_10L-134	Xelaev18043364m.g	chr9_10L	7323274	7323315	-	unique
pA_chr2L-163	Xelaev18012514m.g	chr2L	82843591	82843632	+	unique
pA_chr3L-206	Xelaev18017384m.g	chr3L	42173352	42173393	-	unique
pA_chr4L-167	Xelaev18022280m.g	chr4L	27421418	27421459	+	unique
pA_chr5L-147	Xelaev18026487m.g	chr5L	28847234	28847275	-	unique
pA_chr3S-265	Xelaev18020502m.g	chr3S	43218112	43218153	+	unique
pA_chr1L-463	Xelaev18007059m.g	chr1L	138627535	138627576	-	unique
pA_chr2S-166	Xelaev18014742m.g	chr2S	46093288	46093329	-	unique
pA_chr6L-57	Xelaev18030913m.g	chr6L	33615799	33615840	+	unique
pA_chr2S-53	Xelaev18014453m.g	chr2S	28363402	28363443	+	unique
pA_chr9_10S-352	Xelaev18047738m.g	chr9_10S	96013143	96013184	-	unique
pA_chr2L-44	Xelaev18012510m.g	chr2L	82535057	82535098	-	unique
pA_chr3L-98	Xelaev18018473m.g	chr3L	109318082	109318123	+	unique
pA_chr8L-457	Xelaev18038451m.g	chr8L	10690658	10690699	+	unique
pA_chr4S-15	Xelaev18024349m.g	chr4S	7095112	7095153	-	unique
pA_chr8S-39	Xelaev18042212m.g	chr8S	65843019	65843060	+	unique
pA_chr8L-61	Xelaev18039410m.g	chr8L	59202270	59202311	+	unique
pA_chr1S-43	Xelaev18009039m.g	chr1S	27960103	27960144	+	unique
pA_chr2S-64	Xelaev18015143m.g	chr2S	66126118	66126159	-	unique
pA_chr3L-61	Xelaev18017437m.g	chr3L	45684009	45684050	-	unique
pA_chr4L-16	Xelaev18022248m.g	chr4L	26394921	26394962	-	unique
pA_chr3L-301	Xelaev18019014m.g	chr3L	131311069	131311110	+	unique
pA_chr4S-92	Xelaev18024632m.g	chr4S	22084493	22084534	+	unique
pA_chr3L-89	Xelaev18019573m.g	chr3L	142672880	142672921	+	unique
pA_chr6L-127	Xelaev18031210m.g	chr6L	57528468	57528509	-	unique
pA_chr4S-12	Xelaev18025276m.g	chr4S	70418241	70418282	+	unique
pA_chr5S-78	Xelaev18030036m.g	chr5S	114690799	114690840	-	unique
pA_chr9_10S-21	Xelaev18047426m.g	chr9_10S	76171081	76171122	+	unique
pA_chr6L-93	Xelaev18031133m.g	chr6L	50875808	50875849	-	unique
pA_chr3S-25	Xelaev18020865m.g	chr3S	62941948	62941989	-	unique
pA_chr9_10L-153	Xelaev18043090m.g	chr9_10L	809490	809531	+	unique
pA_chr1L-24	Xelaev18005351m.g	chr1L	37423638	37423679	-	unique
pA_chr1L-226	Xelaev18007403m.g	chr1L	143446704	143446745	+	unique
pA_chr2L-120	Xelaev18012767m.g	chr2L	96112202	96112243	+	unique
pA_chr4L-299	Xelaev18022896m.g	chr4L	66983968	66984009	+	unique
pA_chr4L-61	Xelaev18023891m.g	chr4L	122725566	122725607	-	unique
pA_chr5S-101	Xelaev18028836m.g	chr5S	27938373	27938414	+	unique
pA_chr5L-35	Xelaev18026785m.g	chr5L	51155499	51155540	+	unique
pA_chr7L-42	Xelaev18034602m.g	chr7L	20670045	20670086	-	unique
pA_chr2S-154	Xelaev18014473m.g	chr2S	28849705	28849746	-	unique
pA_chr4S-188	Xelaev18025010m.g	chr4S	50259345	50259386	-	unique
pA_chr8S-20	Xelaev18042402m.g	chr8S	77705133	77705174	-	unique
pA_chr1L-312	Xelaev18005705m.g	chr1L	66090309	66090350	+	unique
pA_chr5S-37	Xelaev18028698m.g	chr5S	17487403	17487444	-	unique
pA_chr6S-35	Xelaev18033485m.g	chr6S	71662425	71662466	-	unique
pA_chr9_10S-61	Xelaev18047194m.g	chr9_10S	61681078	61681119	-	unique
pA_chr1L-148	Xelaev18007915m.g	chr1L	167407541	167407582	-	unique
pA_chr2L-33	Xelaev18013643m.g	chr2L	151458491	151458532	+	unique
pA_chr3L-86	Xelaev18018449m.g	chr3L	108341458	108341499	-	unique
pA_chr5L-48	Xelaev18026883m.g	chr5L	57097103	57097144	-	unique
pA_chr8L-76	Xelaev18039773m.g	chr8L	77582543	77582584	-	unique
pA_chr3S-51	Xelaev18019966m.g	chr3S	11110856	11110897	+	unique
pA_chr8L-174	Xelaev18039531m.g	chr8L	64287259	64287300	+	unique
pA_chr3L-78	Xelaev18016889m.g	chr3L	11960807	11960848	+	unique
pA_chr5S-52	Xelaev18028852m.g	chr5S	29272354	29272395	+	unique
pA_chr1L-118	Xelaev18008207m.g	chr1L	189819111	189819152	-	unique
pA_chr2L-43	Xelaev18012359m.g	chr2L	73687579	73687620	-	unique
pA_chr4L-189	Xelaev18022661m.g	chr4L	52751490	52751531	+	unique
pA_chr2S-219	Xelaev18014822m.g	chr2S	51692568	51692609	-	unique
pA_chr5S-174	Xelaev18029784m.g	chr5S	98101937	98101978	-	unique
pA_chr9_10L-45	Xelaev18043594m.g	chr9_10L	17558868	17558909	-	unique
pA_chr1L-166	Xelaev18006062m.g	chr1L	87705064	87705105	+	unique
pA_chr7L-41	Xelaev18035956m.g	chr7L	101627353	101627394	+	unique
pA_chr3S-90	Xelaev18020266m.g	chr3S	25830453	25830494	+	unique
pA_chr8S-109	Xelaev18041444m.g	chr8S	27059475	27059516	+	unique
pA_chr5L-132	Xelaev18026551m.g	chr5L	34700576	34700617	-	unique
pA_chr2S-189	Xelaev18015121m.g	chr2S	65076287	65076328	+	unique
pA_chr3S-100	Xelaev18021290m.g	chr3S	95558077	95558118	+	unique
pA_chr6S-20	Xelaev18033198m.g	chr6S	44697054	44697095	+	unique
pA_chr9_10L-102	Xelaev18045239m.g	chr9_10L	95821282	95821323	+	unique
pA_chr7L-31	Xelaev18034541m.g	chr7L	14794656	14794697	-	unique
pA_chr4S-74	Xelaev18025827m.g	chr4S	101403380	101403421	+	unique
pA_chr6S-21	Xelaev18033950m.g	chr6S	111977731	111977772	+	unique
pA_chr4L-108	Xelaev18023691m.g	chr4L	114976723	114976764	+	unique
pA_chr1S-53	Xelaev18011160m.g	chr1S	178813801	178813842	-	unique
pA_chr3S-71	Xelaev18021064m.g	chr3S	78332842	78332883	-	unique
pA_chr5S-9	Xelaev18028513m.g	chr5S	3467150	3467191	-	unique
pA_chr7S-92	Xelaev18037587m.g	chr7S	67101943	67101984	-	unique
pA_chr2L-100	Xelaev18012800m.g	chr2L	98945613	98945654	+	unique
pA_chr2L-64	Xelaev18013587m.g	chr2L	149203300	149203341	-	unique
pA_chr5L-86	Xelaev18027155m.g	chr5L	76240782	76240823	+	unique
pA_chr6L-85	Xelaev18030931m.g	chr6L	35216148	35216189	-	unique
pA_chr4S-125	Xelaev18024184m.g	chr4S	1027407	1027448	+	unique
pA_chr5S-103	Xelaev18029271m.g	chr5S	59737244	59737285	-	unique
pA_chr4L-38	Xelaev18023124m.g	chr4L	83038907	83038948	+	unique
pA_chr9_10L-210	Xelaev18044942m.g	chr9_10L	79425324	79425365	-	unique
pA_chr1S-233	Xelaev18010151m.g	chr1S	109379362	109379403	-	unique
pA_chr2S-137	Xelaev18015391m.g	chr2S	83421712	83421753	-	unique
pA_chr3S-57	Xelaev18020958m.g	chr3S	70511234	70511275	-	unique
pA_chr5S-39	Xelaev18029887m.g	chr5S	106864864	106864905	-	unique
pA_chr1S-165	Xelaev18011156m.g	chr1S	178736544	178736585	+	unique
pA_chr2S-113	Xelaev18015055m.g	chr2S	62857016	62857057	+	unique
pA_chr5S-18	Xelaev18029769m.g	chr5S	97161894	97161935	+	unique
pA_chr9_10L-70	Xelaev18043188m.g	chr9_10L	2591420	2591461	+	unique
pA_chr1L-86	Xelaev18008451m.g	chr1L	209662331	209662372	+	unique
pA_chr4L-107	Xelaev18023687m.g	chr4L	114891748	114891789	+	unique
pA_chr7L-46	Xelaev18034580m.g	chr7L	18655564	18655605	+	unique
pA_chr8L-49	Xelaev18039615m.g	chr8L	69015099	69015140	-	unique
pA_chr3S-34	Xelaev18020129m.g	chr3S	20821314	20821355	-	unique
pA_chr5S-249	Xelaev18028835m.g	chr5S	27882572	27882613	+	unique
pA_chr5S-72	Xelaev18028949m.g	chr5S	35308820	35308861	-	unique
pA_chr9_10S-90	Xelaev18047477m.g	chr9_10S	78590760	78590801	-	unique
pA_chr4L-45	Xelaev18022463m.g	chr4L	36996698	36996739	-	unique
pA_chr5L-184	Xelaev18026510m.g	chr5L	30749530	30749571	-	unique
pA_chr1S-41	Xelaev18010862m.g	chr1S	154709773	154709814	+	unique
pA_chr1L-195	Xelaev18006727m.g	chr1L	116954239	116954280	-	unique
pA_chr3L-295	Xelaev18018168m.g	chr3L	89650609	89650650	+	unique
pA_chr5L-22	Xelaev18026802m.g	chr5L	52090416	52090457	+	unique
pA_chr7L-348	Xelaev18035305m.g	chr7L	68717492	68717533	-	unique
pA_chr1S-142	Xelaev18010360m.g	chr1S	118312807	118312848	-	unique
pA_chr9_10L-194	Xelaev18043193m.g	chr9_10L	2631880	2631921	-	unique
pA_chr2S-47	Xelaev18014436m.g	chr2S	27743510	27743551	+	unique
pA_chr2S-108	Xelaev18016343m.g	chr2S	150243491	150243532	+	unique
pA_chr9_10S-325	Xelaev18045839m.g	chr9_10S	63359	63400	-	unique
pA_chr9_10S-32	Xelaev18046013m.g	chr9_10S	3878823	3878864	+	unique
pA_chr4L-64	Xelaev18023102m.g	chr4L	81291948	81291989	-	unique
pA_chr3S-61	Xelaev18019718m.g	chr3S	1357255	1357296	+	unique
pA_chr1L-138	Xelaev18007579m.g	chr1L	151824320	151824361	+	unique
pA_chr1L-324	Xelaev18008004m.g	chr1L	174721144	174721185	+	unique
pA_chr1S-72	Xelaev18010867m.g	chr1S	154865773	154865814	+	unique
pA_chr1L-100	Xelaev18004995m.g	chr1L	9755720	9755761	-	unique
pA_chr1L-21	Xelaev18006181m.g	chr1L	94635312	94635353	+	unique
pA_chr6S-28	Xelaev18033222m.g	chr6S	45948909	45948950	-	unique
pA_chr8S-104	Xelaev18041036m.g	chr8S	2864949	2864990	+	unique
pA_chr1L-210	Xelaev18006851m.g	chr1L	127010593	127010634	-	unique
pA_chr2L-326	Xelaev18013349m.g	chr2L	138256839	138256880	-	unique
pA_chr2S-77	Xelaev18015312m.g	chr2S	77288503	77288544	+	unique
pA_chr9_10L-292	Xelaev18044693m.g	chr9_10L	65689549	65689590	+	unique
pA_chr4L-213	Xelaev18022721m.g	chr4L	56300145	56300186	-	unique
pA_chr4L-217	Xelaev18023324m.g	chr4L	94881961	94882002	-	unique
pA_chr8L-15	Xelaev18039849m.g	chr8L	81770487	81770528	-	unique
pA_chr8L-71	Xelaev18039152m.g	chr8L	51667984	51668025	-	unique
pA_chr7L-162	Xelaev18035450m.g	chr7L	74987446	74987487	-	unique
pA_chr9_10L-105	Xelaev18043755m.g	chr9_10L	23749057	23749098	+	unique
pA_chr4L-54	Xelaev18022820m.g	chr4L	64295778	64295819	+	unique
pA_chr5L-51	Xelaev18027302m.g	chr5L	88334744	88334785	+	unique
pA_chr3L-333	Xelaev18017789m.g	chr3L	68958304	68958345	+	unique
pA_chr8L-27	Xelaev18038842m.g	chr8L	33862199	33862240	-	unique
pA_chr4S-210	Xelaev18025521m.g	chr4S	86560035	86560076	+	unique
pA_chr7S-54	Xelaev18037389m.g	chr7S	51685877	51685918	+	unique
pA_chr7S-19	Xelaev18037805m.g	chr7S	78736972	78737013	+	unique
pA_chr2L-112	Xelaev18013370m.g	chr2L	138831441	138831482	-	unique
pA_chr3L-83	Xelaev18016856m.g	chr3L	10343049	10343090	-	unique
pA_chr5S-117	Xelaev18028626m.g	chr5S	12074621	12074662	+	unique
pA_chr3L-100	Xelaev18018751m.g	chr3L	122334543	122334584	+	unique
pA_chr8L-50	Xelaev18038220m.g	chr8L	1985662	1985703	-	unique
pA_chr2S-49	Xelaev18015968m.g	chr2S	125055293	125055334	-	unique
pA_chr9_10L-115	Xelaev18044447m.g	chr9_10L	50590134	50590175	+	unique
pA_chr3L-318	Xelaev18018335m.g	chr3L	99098602	99098643	+	unique
pA_chr5L-41	Xelaev18026468m.g	chr5L	27700144	27700185	+	unique
pA_chr4S-65	Xelaev18024935m.g	chr4S	43117808	43117849	-	unique
pA_chr1L-218	Xelaev18004907m.g	chr1L	7392307	7392348	+	unique
pA_chr2L-52	Xelaev18013787m.g	chr2L	161693803	161693844	+	unique
pA_chr5L-20	Xelaev18027045m.g	chr5L	68882530	68882571	+	unique
pA_chr4S-181	Xelaev18026046m.g	chr4S	121006404	121006445	-	unique
pA_chr1L-94	Xelaev18006973m.g	chr1L	134722663	134722704	-	unique
pA_chr3L-143	Xelaev18018245m.g	chr3L	94875547	94875588	-	unique
pA_chr4L-192	Xelaev18023307m.g	chr4L	93849796	93849837	+	unique
pA_chr5L-61	Xelaev18026087m.g	chr5L	2072647	2072688	-	unique
pA_chr5L-137	Xelaev18026275m.g	chr5L	16592743	16592784	+	unique
pA_chr6L-53	Xelaev18031304m.g	chr6L	63582149	63582190	+	unique
pA_chr9_10S-185	Xelaev18047247m.g	chr9_10S	64853543	64853584	+	unique
pA_chr1L-54	Xelaev18005436m.g	chr1L	44776058	44776099	+	unique
pA_chr1L-499	Xelaev18007387m.g	chr1L	143110898	143110939	+	unique
pA_chr4L-39	Xelaev18023173m.g	chr4L	86493764	86493805	+	unique
pA_chr5L-29	Xelaev18026271m.g	chr5L	16402289	16402330	-	unique
pA_chr6L-21	Xelaev18031307m.g	chr6L	63695479	63695520	-	unique
pA_chr5S-247	Xelaev18028486m.g	chr5S	1472622	1472663	+	unique
pA_chr7S-23	Xelaev18037233m.g	chr7S	37817462	37817503	+	unique
pA_chr9_10S-53	Xelaev18047580m.g	chr9_10S	87487897	87487938	+	unique
pA_chr2L-101	Xelaev18012819m.g	chr2L	99918947	99918988	+	unique
pA_chr2L-212	Xelaev18013645m.g	chr2L	151539174	151539215	-	unique
pA_chr1S-231	Xelaev18010012m.g	chr1S	96530794	96530835	-	unique
pA_chr7L-30	Xelaev18035811m.g	chr7L	95793561	95793602	+	unique
pA_chr4S-69	Xelaev18025862m.g	chr4S	104497421	104497462	-	unique
pA_chr8S-72	Xelaev18041701m.g	chr8S	34895415	34895456	+	unique
pA_chr6L-97	Xelaev18031247m.g	chr6L	60309039	60309080	-	unique
pA_chr7L-276	Xelaev18036378m.g	chr7L	119532992	119533033	-	unique
pA_chr8L-8	Xelaev18039700m.g	chr8L	73940414	73940455	+	unique
pA_chr1S-100	Xelaev18009401m.g	chr1S	60798345	60798386	+	unique
pA_chr1S-111	Xelaev18010226m.g	chr1S	115014794	115014835	+	unique
pA_chr2L-111	Xelaev18013249m.g	chr2L	133552123	133552164	+	unique
pA_chr3L-110	Xelaev18018478m.g	chr3L	109474375	109474416	-	unique
pA_chr5L-15	Xelaev18026124m.g	chr5L	5298052	5298093	-	unique
pA_chr7L-94	Xelaev18034456m.g	chr7L	10326337	10326378	+	unique
pA_chr2S-296	Xelaev18014438m.g	chr2S	27749800	27749841	-	unique
pA_chr3S-64	Xelaev18020548m.g	chr3S	45439956	45439997	-	unique
pA_chr9_10L-146	Xelaev18043820m.g	chr9_10L	28353932	28353973	-	unique
pA_chr9_10L-65	Xelaev18045057m.g	chr9_10L	84869338	84869379	+	unique
pA_chr2L-447	Xelaev18011243m.g	chr2L	1403821	1403862	-	unique
pA_chr2L-115	Xelaev18011606m.g	chr2L	27590341	27590382	+	unique
pA_chr8L-69	Xelaev18038955m.g	chr8L	44248611	44248652	-	unique
pA_chr4S-131	Xelaev18024162m.g	chr4S	332044	332085	-	unique
pA_chr2L-173	Xelaev18011184m.g	chr2L	195368	195409	-	unique
pA_chr1S-123	Xelaev18009232m.g	chr1S	44991854	44991895	-	unique
pA_chr4S-18	Xelaev18024211m.g	chr4S	1752877	1752918	-	unique
pA_chr5S-16	Xelaev18028769m.g	chr5S	22639507	22639548	+	unique
pA_chr9_10L-81	Xelaev18045046m.g	chr9_10L	84567272	84567313	+	unique
pA_chr2L-50	Xelaev18012497m.g	chr2L	81429043	81429084	-	unique
pA_chr6L-77	Xelaev18030845m.g	chr6L	28173530	28173571	+	unique
pA_chr7L-90	Xelaev18035437m.g	chr7L	74362150	74362191	+	unique
pA_chr8S-18	Xelaev18041100m.g	chr8S	5965017	5965058	+	unique
pA_chr3S-238	Xelaev18020309m.g	chr3S	27156133	27156174	-	unique
pA_chr5S-48	Xelaev18028791m.g	chr5S	25025205	25025246	+	unique
pA_chr9_10S-23	Xelaev18046862m.g	chr9_10S	39833940	39833981	-	unique
pA_chr2L-150	Xelaev18012230m.g	chr2L	64452489	64452530	+	unique
pA_chr9_10L-38	Xelaev18044411m.g	chr9_10L	48900597	48900638	+	unique
pA_chr2L-139	Xelaev18012563m.g	chr2L	85808682	85808723	-	unique
pA_chr5L-57	Xelaev18028098m.g	chr5L	143615326	143615367	-	unique
pA_chr2S-32	Xelaev18014434m.g	chr2S	27730606	27730647	-	unique
pA_chr2S-252	Xelaev18015292m.g	chr2S	76453090	76453131	-	unique
pA_chr4S-42	Xelaev18025879m.g	chr4S	105618116	105618157	+	unique
pA_chr2L-545	Xelaev18011891m.g	chr2L	45369016	45369057	-	unique
pA_chr2L-576	Xelaev18013725m.g	chr2L	157422704	157422745	+	unique
pA_chr8L-66	Xelaev18040411m.g	chr8L	105433872	105433913	-	unique
pA_chr1S-95	Xelaev18009011m.g	chr1S	25757628	25757669	+	unique
pA_chr9_10S-164	Xelaev18047478m.g	chr9_10S	78692838	78692879	+	unique
pA_chr4L-62	Xelaev18022218m.g	chr4L	25134090	25134131	-	unique
pA_chr5L-37	Xelaev18027442m.g	chr5L	98199941	98199982	+	unique
pA_chr5S-64	Xelaev18029020m.g	chr5S	41790454	41790495	+	unique
pA_chr9_10S-88	Xelaev18046516m.g	chr9_10S	25841904	25841945	+	unique
pA_chr6L-99	Xelaev18032080m.g	chr6L	120032905	120032946	+	unique
pA_chr1L-314	Xelaev18006236m.g	chr1L	96785429	96785470	-	unique
pA_chr8S-81	Xelaev18043012m.g	chr8S	98425032	98425073	+	unique
pA_chr5L-111	Xelaev18027671m.g	chr5L	113394061	113394102	+	unique
pA_chr1S-96	Xelaev18009389m.g	chr1S	59906541	59906582	+	unique
pA_chr1L-62	Xelaev18008172m.g	chr1L	187761913	187761954	-	unique
pA_chr6L-104	Xelaev18030615m.g	chr6L	7726153	7726194	-	unique
pA_chr1L-175	Xelaev18008378m.g	chr1L	203847385	203847426	+	unique
pA_chr3L-395	Xelaev18018308m.g	chr3L	97997529	97997570	+	unique
pA_chr5L-115	Xelaev18026165m.g	chr5L	8752638	8752679	+	unique
pA_chr1S-215	Xelaev18010762m.g	chr1S	144086943	144086984	-	unique
pA_chr3S-35	Xelaev18020408m.g	chr3S	34906130	34906171	-	unique
pA_chr6S-48	Xelaev18032961m.g	chr6S	24351350	24351391	-	unique
pA_chr1L-326	Xelaev18008420m.g	chr1L	207165308	207165349	+	unique
pA_chr3S-74	Xelaev18020270m.g	chr3S	25937542	25937583	+	unique
pA_chr3S-11	Xelaev18020758m.g	chr3S	58087086	58087127	-	unique
pA_chr4S-102	Xelaev18024969m.g	chr4S	47906155	47906196	+	unique
pA_chr8S-227	Xelaev18042298m.g	chr8S	73114894	73114935	+	unique
pA_chr8S-134	Xelaev18042654m.g	chr8S	87013162	87013203	-	unique
pA_chr9_10L-62	Xelaev18043309m.g	chr9_10L	5521142	5521183	+	unique
pA_chr9_10L-118	Xelaev18045126m.g	chr9_10L	87794237	87794278	+	unique
pA_chr4L-358	Xelaev18023359m.g	chr4L	97072549	97072590	+	unique
pA_chr8L-299	Xelaev18038083m.g	chr8L	97076	97117	+	unique
pA_chr2S-247	Xelaev18014684m.g	chr2S	42299264	42299305	-	unique
pA_chr4S-201	Xelaev18024277m.g	chr4S	3441611	3441652	-	unique
pA_chr7S-34	Xelaev18036854m.g	chr7S	11993738	11993779	-	unique
pA_chr9_10L-82	Xelaev18045403m.g	chr9_10L	104872811	104872852	+	unique
pA_chr9_10L-67	Xelaev18045440m.g	chr9_10L	105896548	105896589	+	unique
pA_chr5L-13	Xelaev18027724m.g	chr5L	117089265	117089306	-	unique
pA_chr8L-72	Xelaev18039280m.g	chr8L	55486172	55486213	-	unique
pA_chr1L-137	Xelaev18006663m.g	chr1L	112301569	112301610	+	unique
pA_chr3L-485	Xelaev18017767m.g	chr3L	68015372	68015413	-	unique
pA_chr2S-150	Xelaev18016290m.g	chr2S	143955310	143955351	+	unique
pA_chr1L-633	Xelaev18007345m.g	chr1L	141968828	141968869	-	unique
pA_chr5L-66	Xelaev18028048m.g	chr5L	138525607	138525648	-	unique
pA_chr1S-36	Xelaev18009250m.g	chr1S	46724820	46724861	-	unique
pA_chr2S-22	Xelaev18015483m.g	chr2S	91115206	91115247	+	unique
pA_chr5S-119	Xelaev18028796m.g	chr5S	25356938	25356979	+	unique
pA_chr8S-58	Xelaev18042276m.g	chr8S	71292443	71292484	-	unique
pA_chr9_10S-60	Xelaev18046829m.g	chr9_10S	38536617	38536658	+	unique
pA_chr1L-348	Xelaev18007414m.g	chr1L	143736763	143736804	+	unique
pA_chr7L-185	Xelaev18036050m.g	chr7L	106005461	106005502	+	unique
pA_chr2S-61	Xelaev18015869m.g	chr2S	120412629	120412670	-	unique
pA_chr1L-99	Xelaev18007575m.g	chr1L	151743435	151743476	+	unique
pA_chr4L-144	Xelaev18022995m.g	chr4L	74398079	74398120	-	unique
pA_chr7L-129	Xelaev18035840m.g	chr7L	97515537	97515578	+	unique
pA_chr3S-17	Xelaev18020909m.g	chr3S	65679396	65679437	+	unique
pA_chr5S-17	Xelaev18028634m.g	chr5S	12214897	12214938	-	unique
pA_chr7S-121	Xelaev18037658m.g	chr7S	71828375	71828416	-	unique
pA_chr2L-291	Xelaev18011589m.g	chr2L	26643071	26643112	-	unique
pA_chr3L-38	Xelaev18019577m.g	chr3L	142772649	142772690	-	unique
pA_chr6L-88	Xelaev18032252m.g	chr6L	132240738	132240779	+	unique
pA_chr2S-142	Xelaev18015452m.g	chr2S	88126181	88126222	+	unique
pA_chr8L-60	Xelaev18038747m.g	chr8L	24847048	24847089	-	unique
pA_chr2S-173	Xelaev18014665m.g	chr2S	41168238	41168279	-	unique
pA_chr6S-136	Xelaev18033202m.g	chr6S	45067345	45067386	+	unique
pA_chr9_10L-136	Xelaev18043753m.g	chr9_10L	23709618	23709659	+	unique
pA_chr9_10S-132	Xelaev18045897m.g	chr9_10S	1199751	1199792	+	unique
pA_chr1L-187	Xelaev18007064m.g	chr1L	138738597	138738638	-	unique
pA_chr2L-37	Xelaev18013403m.g	chr2L	140030637	140030678	+	unique
pA_chr5L-6	Xelaev18026482m.g	chr5L	28397676	28397717	-	unique
pA_chr8L-136	Xelaev18039112m.g	chr8L	50389015	50389056	-	unique
pA_chr8L-44	Xelaev18039935m.g	chr8L	85849640	85849681	-	unique
pA_chr4S-106	Xelaev18025350m.g	chr4S	74540823	74540864	+	unique
pA_chr8S-161	Xelaev18041246m.g	chr8S	15792406	15792447	-	unique
pA_chr9_10L-41	Xelaev18045067m.g	chr9_10L	85164864	85164905	+	unique
pA_chr2S-271	Xelaev18015405m.g	chr2S	84343583	84343624	+	unique
pA_chr6S-56	Xelaev18033588m.g	chr6S	82621110	82621151	-	unique
pA_chr4L-105	Xelaev18023402m.g	chr4L	98975622	98975663	+	unique
pA_chr3S-181	Xelaev18020915m.g	chr3S	66085445	66085486	-	unique
pA_chr7S-36	Xelaev18037794m.g	chr7S	78256733	78256774	-	unique
pA_chr3L-129	Xelaev18018634m.g	chr3L	118960597	118960638	-	unique
pA_chr6L-54	Xelaev18031672m.g	chr6L	90494810	90494851	+	unique
pA_chr8L-472	Xelaev18039081m.g	chr8L	49866548	49866589	-	unique
pA_chr1S-76	Xelaev18010781m.g	chr1S	145750354	145750395	-	unique
pA_chr1L-173	Xelaev18008005m.g	chr1L	174724949	174724990	-	unique
pA_chr3L-133	Xelaev18017255m.g	chr3L	36736392	36736433	-	unique
pA_chr9_10S-103	Xelaev18047624m.g	chr9_10S	90367745	90367786	-	unique
pA_chr2L-80	Xelaev18012683m.g	chr2L	91921773	91921814	-	unique
pA_chr2S-111	Xelaev18014946m.g	chr2S	58233859	58233900	-	unique
pA_chr4S-107	Xelaev18025363m.g	chr4S	74964623	74964664	-	unique
pA_chr4S-26	Xelaev18025811m.g	chr4S	100960283	100960324	-	unique
pA_chr1S-191	Xelaev18008842m.g	chr1S	9580287	9580328	-	unique
pA_chr1S-254	Xelaev18009347m.g	chr1S	56475992	56476033	-	unique
pA_chr2S-167	Xelaev18014764m.g	chr2S	47774705	47774746	+	unique
pA_chr9_10S-47	Xelaev18045940m.g	chr9_10S	2147629	2147670	-	unique
pA_chr2L-84	Xelaev18012612m.g	chr2L	88278500	88278541	-	unique
pA_chr3L-183	Xelaev18017798m.g	chr3L	69612362	69612403	+	unique
pA_chr5S-53	Xelaev18029422m.g	chr5S	70954438	70954479	+	unique
pA_chr6S-170	Xelaev18034007m.g	chr6S	118751515	118751556	+	unique
pA_chr9_10S-57	Xelaev18047232m.g	chr9_10S	63836708	63836749	-	unique
pA_chr9_10S-96	Xelaev18047438m.g	chr9_10S	76570522	76570563	+	unique
pA_chr2L-55	Xelaev18013735m.g	chr2L	157655347	157655388	+	unique
pA_chr4L-463	Xelaev18023869m.g	chr4L	122105914	122105955	+	unique
pA_chr7L-60	Xelaev18034594m.g	chr7L	20076674	20076715	-	unique
pA_chr8L-288	Xelaev18039568m.g	chr8L	65704031	65704072	-	unique
pA_chr1S-291	Xelaev18010071m.g	chr1S	103763576	103763617	+	unique
pA_chr4S-75	Xelaev18025900m.g	chr4S	107764660	107764701	-	unique
pA_chr4L-84	Xelaev18022896m.g	chr4L	66984079	66984120	+	unique
pA_chr3S-30	Xelaev18020681m.g	chr3S	53709836	53709877	+	unique
pA_chr8S-136	Xelaev18041233m.g	chr8S	14221756	14221797	+	unique
pA_chr4L-85	Xelaev18022957m.g	chr4L	72688052	72688093	+	unique
pA_chr5L-18	Xelaev18026414m.g	chr5L	23290466	23290507	-	unique
pA_chr8L-123	Xelaev18038443m.g	chr8L	10531927	10531968	-	unique
pA_chr4S-269	Xelaev18025620m.g	chr4S	91963742	91963783	-	unique
pA_chr2L-96	Xelaev18011563m.g	chr2L	21494201	21494242	-	unique
pA_chr4L-59	Xelaev18023699m.g	chr4L	115210804	115210845	-	unique
pA_chr8L-103	Xelaev18040653m.g	chr8L	113080850	113080891	-	unique
pA_chr2L-161	Xelaev18012097m.g	chr2L	58271569	58271610	+	unique
pA_chr6L-82	Xelaev18031395m.g	chr6L	70757298	70757339	+	unique
pA_chr5S-126	Xelaev18028880m.g	chr5S	30572152	30572193	+	unique
pA_chr9_10L-89	Xelaev18044306m.g	chr9_10L	44600514	44600555	-	unique
pA_chr1L-32	Xelaev18007038m.g	chr1L	138222939	138222980	+	unique
pA_chr6L-159	Xelaev18031322m.g	chr6L	64523402	64523443	+	unique
pA_chr1S-78	Xelaev18011070m.g	chr1S	170960436	170960477	+	unique
pA_chr3S-62	Xelaev18019950m.g	chr3S	10312049	10312090	-	unique
pA_chr3S-14	Xelaev18019995m.g	chr3S	12586514	12586555	+	unique
pA_chr8S-21	Xelaev18042642m.g	chr8S	86150033	86150074	-	unique
pA_chr2L-198	Xelaev18011701m.g	chr2L	33229264	33229305	-	unique
pA_chr5L-60	Xelaev18027283m.g	chr5L	87108718	87108759	+	unique
pA_chr7L-157	Xelaev18034826m.g	chr7L	35538605	35538646	-	unique
pA_chr7L-81	Xelaev18034919m.g	chr7L	43226982	43227023	+	unique
pA_chr8L-419	Xelaev18040901m.g	chr8L	118797345	118797386	+	unique
pA_chr7S-79	Xelaev18037696m.g	chr7S	73097136	73097177	+	unique
pA_chr2L-275	Xelaev18012307m.g	chr2L	68607785	68607826	-	unique
pA_chr3L-80	Xelaev18017687m.g	chr3L	62800887	62800928	+	unique
pA_chr3L-185	Xelaev18018062m.g	chr3L	84122376	84122417	+	unique
pA_chr5L-79	Xelaev18027940m.g	chr5L	128913445	128913486	+	unique
pA_chr2S-195	Xelaev18015544m.g	chr2S	94735372	94735413	+	unique
pA_chr2S-147	Xelaev18015836m.g	chr2S	119167237	119167278	-	unique
pA_chr4S-155	Xelaev18024221m.g	chr4S	1961186	1961227	+	unique
pA_chr4S-98	Xelaev18025146m.g	chr4S	60799863	60799904	+	unique
pA_chr1L-367	Xelaev18006024m.g	chr1L	86220779	86220820	+	unique
pA_chr8L-167	Xelaev18038840m.g	chr8L	33669460	33669501	-	unique
pA_chr9_10L-51	Xelaev18045095m.g	chr9_10L	85858184	85858225	+	unique
pA_chr9_10S-44	Xelaev18046362m.g	chr9_10S	16983106	16983147	-	unique
pA_chr9_10S-26	Xelaev18047558m.g	chr9_10S	86581150	86581191	+	unique
pA_chr1L-259	Xelaev18005922m.g	chr1L	79907786	79907827	+	unique
pA_chr2L-109	Xelaev18012521m.g	chr2L	83037658	83037699	+	unique
pA_chr4S-158	Xelaev18024784m.g	chr4S	31624761	31624802	-	unique
pA_chr8S-45	Xelaev18041362m.g	chr8S	25531691	25531732	-	unique
pA_chr9_10L-39	Xelaev18043869m.g	chr9_10L	30396299	30396340	+	unique
pA_chr2L-175	Xelaev18011474m.g	chr2L	13496176	13496217	+	unique
pA_chr8L-41	Xelaev18040547m.g	chr8L	109538249	109538290	-	unique
pA_chr3S-80	Xelaev18020394m.g	chr3S	34402723	34402764	-	unique
pA_chr4S-33	Xelaev18025240m.g	chr4S	67521836	67521877	-	unique
pA_chr5S-168	Xelaev18029338m.g	chr5S	65192755	65192796	+	unique
pA_chr8S-47	Xelaev18042545m.g	chr8S	82677897	82677938	+	unique
pA_chr9_10L-139	Xelaev18043931m.g	chr9_10L	32774234	32774275	+	unique
pA_chr9_10S-110	Xelaev18047541m.g	chr9_10S	84253419	84253460	-	unique
pA_chr2L-259	Xelaev18012399m.g	chr2L	76824940	76824981	+	unique
pA_chr2L-233	Xelaev18013508m.g	chr2L	145145689	145145730	+	unique
pA_chr6L-155	Xelaev18032361m.g	chr6L	143268592	143268633	+	unique
pA_chr8L-250	Xelaev18039224m.g	chr8L	53440311	53440352	-	unique
pA_chr6S-32	Xelaev18033591m.g	chr6S	82715847	82715888	+	unique
pA_chr8S-86	Xelaev18041787m.g	chr8S	38273923	38273964	+	unique
pA_chr1L-15	Xelaev18005203m.g	chr1L	27447034	27447075	-	unique
pA_chr7L-40	Xelaev18034759m.g	chr7L	31608099	31608140	+	unique
pA_chr7L-242	Xelaev18035356m.g	chr7L	70740598	70740639	+	unique
pA_chr1S-159	Xelaev18010605m.g	chr1S	133804263	133804304	-	unique
pA_chr6S-8	Xelaev18032996m.g	chr6S	26750950	26750991	-	unique
pA_chr8S-231	Xelaev18042507m.g	chr8S	81404816	81404857	-	unique
pA_chr2L-254	Xelaev18011526m.g	chr2L	16064032	16064073	-	unique
pA_chr3L-84	Xelaev18017512m.g	chr3L	49870471	49870512	+	unique
pA_chr3L-230	Xelaev18018231m.g	chr3L	94134898	94134939	-	unique
pA_chr1S-211	Xelaev18009936m.g	chr1S	90726757	90726798	+	unique
pA_chr2S-122	Xelaev18015396m.g	chr2S	83728679	83728720	+	unique
pA_chr3S-124	Xelaev18020619m.g	chr3S	49248871	49248912	-	unique
pA_chr5L-62	Xelaev18026579m.g	chr5L	36654638	36654679	-	unique
pA_chr6L-108	Xelaev18031067m.g	chr6L	46423712	46423753	+	unique
pA_chr8L-75	Xelaev18039519m.g	chr8L	63688353	63688394	+	unique
pA_chr3S-276	Xelaev18021269m.g	chr3S	93293811	93293852	-	unique
pA_chr6S-125	Xelaev18033167m.g	chr6S	42810673	42810714	-	unique
pA_chr9_10L-79	Xelaev18043138m.g	chr9_10L	1558012	1558053	+	unique
pA_chr1L-186	Xelaev18006725m.g	chr1L	116936585	116936626	+	unique
pA_chr2L-154	Xelaev18012629m.g	chr2L	88762608	88762649	-	unique
pA_chr8L-150	Xelaev18038662m.g	chr8L	22049198	22049239	+	unique
pA_chr3S-29	Xelaev18021455m.g	chr3S	106368746	106368787	+	unique
pA_chr9_10S-135	Xelaev18046010m.g	chr9_10S	3749772	3749813	+	unique
pA_chr2L-407	Xelaev18011875m.g	chr2L	44830537	44830578	-	unique
pA_chr2L-366	Xelaev18013232m.g	chr2L	132686147	132686188	-	unique
pA_chr7L-87	Xelaev18036094m.g	chr7L	107735582	107735623	-	unique
pA_chr9_10L-83	Xelaev18043570m.g	chr9_10L	17041750	17041791	-	unique
pA_chr9_10L-300	Xelaev18043840m.g	chr9_10L	29175237	29175278	-	unique
pA_chr9_10L-130	Xelaev18045232m.g	chr9_10L	94546953	94546994	-	unique
pA_chr9_10S-274	Xelaev18047328m.g	chr9_10S	70190941	70190982	-	unique
pA_chr2L-77	Xelaev18011472m.g	chr2L	13469818	13469859	+	unique
pA_chr4L-36	Xelaev18021910m.g	chr4L	10737623	10737664	+	unique
pA_chr5L-399	Xelaev18026248m.g	chr5L	15045046	15045087	+	unique
pA_chr1S-181	Xelaev18009424m.g	chr1S	62649277	62649318	-	unique
pA_chr1S-59	Xelaev18009640m.g	chr1S	78010577	78010618	+	unique
pA_chr2S-28	Xelaev18015116m.g	chr2S	64944310	64944351	+	unique
pA_chr4S-87	Xelaev18025210m.g	chr4S	65175447	65175488	+	unique
pA_chr3L-127	Xelaev18018080m.g	chr3L	84642445	84642486	-	unique
pA_chr3S-103	Xelaev18020018m.g	chr3S	14105954	14105995	+	unique
pA_chr3S-111	Xelaev18020359m.g	chr3S	30485903	30485944	+	unique
pA_chr3S-28	Xelaev18020845m.g	chr3S	61404087	61404128	-	unique
pA_chr5S-210	Xelaev18028878m.g	chr5S	30526679	30526720	-	unique
pA_chr8S-163	Xelaev18041369m.g	chr8S	25647221	25647262	+	unique
pA_chr8S-37	Xelaev18041740m.g	chr8S	35912129	35912170	-	unique
pA_chr1L-245	Xelaev18006669m.g	chr1L	112526648	112526689	+	unique
pA_chr1L-702	Xelaev18008524m.g	chr1L	215636666	215636707	-	unique
pA_chr2L-229	Xelaev18013039m.g	chr2L	113941603	113941644	-	unique
pA_chr3L-117	Xelaev18018417m.g	chr3L	106963049	106963090	-	unique
pA_chr2S-285	Xelaev18014581m.g	chr2S	34299953	34299994	+	unique
pA_chr2S-178	Xelaev18015152m.g	chr2S	66631366	66631407	+	unique
pA_chr1S-64	Xelaev18008925m.g	chr1S	17000199	17000240	+	unique
pA_chr4S-154	Xelaev18024191m.g	chr4S	1241465	1241506	-	unique
pA_chr9_10L-372	Xelaev18045352m.g	chr9_10L	101605525	101605566	+	unique
pA_chr2L-312	Xelaev18011500m.g	chr2L	14436945	14436986	+	unique
pA_chr4L-33	Xelaev18021929m.g	chr4L	11312890	11312931	-	unique
pA_chr4L-99	Xelaev18022810m.g	chr4L	63965973	63966014	+	unique
pA_chr5L-55	Xelaev18026418m.g	chr5L	23442449	23442490	+	unique
pA_chr4S-111	Xelaev18024859m.g	chr4S	39186536	39186577	+	unique
pA_chr4S-207	Xelaev18025203m.g	chr4S	64935830	64935871	-	unique
pA_chr6S-82	Xelaev18033273m.g	chr6S	51880536	51880577	+	unique
pA_chr6S-25	Xelaev18034087m.g	chr6S	126886317	126886358	-	unique
pA_chr9_10S-145	Xelaev18046710m.g	chr9_10S	33697582	33697623	+	unique
pA_chr1L-109	Xelaev18007741m.g	chr1L	158261769	158261810	-	unique
pA_chr5L-42	Xelaev18027348m.g	chr5L	90696859	90696900	+	unique
pA_chr8S-113	Xelaev18042903m.g	chr8S	96762049	96762090	-	unique
pA_chr9_10S-62	Xelaev18046311m.g	chr9_10S	15992236	15992277	+	unique
pA_chr2L-256	Xelaev18011590m.g	chr2L	26738873	26738914	-	unique
pA_chr2S-69	Xelaev18015067m.g	chr2S	63296540	63296581	+	unique
pA_chr6S-90	Xelaev18033119m.g	chr6S	38199034	38199075	+	unique
pA_chr8S-170	Xelaev18042272m.g	chr8S	71088733	71088774	+	unique
pA_chr5L-63	Xelaev18026793m.g	chr5L	51517462	51517503	+	unique
pA_chr8L-357	Xelaev18039628m.g	chr8L	69445998	69446039	+	unique
pA_chr4S-129	Xelaev18025543m.g	chr4S	87708412	87708453	-	unique
pA_chr9_10L-144	Xelaev18045565m.g	chr9_10L	111571466	111571507	-	unique
pA_chr1L-203	Xelaev18008464m.g	chr1L	210565270	210565311	-	unique
pA_chr6L-189	Xelaev18032305m.g	chr6L	138499126	138499167	+	unique
pA_chr1S-200	Xelaev18010308m.g	chr1S	116802771	116802812	+	unique
pA_chr5S-97	Xelaev18029806m.g	chr5S	99521826	99521867	-	unique
pA_chr7S-43	Xelaev18037523m.g	chr7S	62725770	62725811	-	unique
pA_chr9_10L-64	Xelaev18043923m.g	chr9_10L	32575321	32575362	+	unique
pA_chr9_10L-225	Xelaev18045390m.g	chr9_10L	103981640	103981681	-	unique
pA_chr1L-279	Xelaev18007559m.g	chr1L	151460423	151460464	+	unique
pA_chr2L-93	Xelaev18013284m.g	chr2L	135636703	135636744	+	unique
pA_chr3L-53	Xelaev18016836m.g	chr3L	9467918	9467959	-	unique
pA_chr3L-154	Xelaev18019086m.g	chr3L	133118286	133118327	+	unique
pA_chr4L-391	Xelaev18023542m.g	chr4L	107519600	107519641	+	unique
pA_chr1S-253	Xelaev18009224m.g	chr1S	44218109	44218150	-	unique
pA_chr2S-36	Xelaev18014505m.g	chr2S	29340214	29340255	-	unique
pA_chr2S-236	Xelaev18014743m.g	chr2S	46177704	46177745	-	unique
pA_chr2S-180	Xelaev18015542m.g	chr2S	94696326	94696367	+	unique
pA_chr8S-127	Xelaev18041100m.g	chr8S	5965321	5965362	+	unique
pA_chr2L-546	Xelaev18011978m.g	chr2L	51948686	51948727	-	unique
pA_chr3L-245	Xelaev18018197m.g	chr3L	91903213	91903254	+	unique
pA_chr3L-320	Xelaev18018445m.g	chr3L	108271357	108271398	+	unique
pA_chr6L-50	Xelaev18031307m.g	chr6L	63695620	63695661	-	unique
pA_chr7L-59	Xelaev18036567m.g	chr7L	126056409	126056450	-	unique
pA_chr1S-14	Xelaev18009423m.g	chr1S	62641923	62641964	+	unique
pA_chr2S-237	Xelaev18015341m.g	chr2S	78542085	78542126	+	unique
pA_chr2S-169	Xelaev18015771m.g	chr2S	116451312	116451353	+	unique
pA_chr3S-42	Xelaev18020197m.g	chr3S	23095419	23095460	-	unique
pA_chr5S-179	Xelaev18028672m.g	chr5S	14831274	14831315	-	unique
pA_chr8S-24	Xelaev18041159m.g	chr8S	9913009	9913050	-	unique
pA_chr9_10L-52	Xelaev18044260m.g	chr9_10L	43675818	43675859	-	unique
pA_chr9_10S-102	Xelaev18047568m.g	chr9_10S	86982951	86982992	+	unique
pA_chr1L-170	Xelaev18007623m.g	chr1L	152891914	152891955	-	unique
pA_chr3L-106	Xelaev18017414m.g	chr3L	43640616	43640657	+	unique
pA_chr4L-73	Xelaev18022534m.g	chr4L	41562646	41562687	+	unique
pA_chr8L-12	Xelaev18039170m.g	chr8L	52093683	52093724	-	unique
pA_chr2S-125	Xelaev18014415m.g	chr2S	25342469	25342510	-	unique
pA_chr3S-19	Xelaev18021181m.g	chr3S	87262756	87262797	-	unique
pA_chr4L-47	Xelaev18023241m.g	chr4L	88709336	88709377	-	unique
pA_chr5L-112	Xelaev18027710m.g	chr5L	115713356	115713397	-	unique
pA_chr1S-52	Xelaev18009759m.g	chr1S	84737568	84737609	-	unique
pA_chr8S-35	Xelaev18042480m.g	chr8S	79901144	79901185	-	unique
pA_chr9_10L-133	Xelaev18045685m.g	chr9_10L	114948514	114948555	+	unique
pA_chr4L-283	Xelaev18024036m.g	chr4L	132253589	132253630	-	unique
pA_chr5L-28	Xelaev18026688m.g	chr5L	43215019	43215060	+	unique
pA_chr8L-115	Xelaev18038799m.g	chr8L	29520965	29521006	+	unique
pA_chr7S-74	Xelaev18036987m.g	chr7S	22384459	22384500	+	unique
pA_chr8S-122	Xelaev18042089m.g	chr8S	56064410	56064451	+	unique
pA_chr1L-322	Xelaev18007455m.g	chr1L	145421795	145421836	-	unique
pA_chr2L-384	Xelaev18012188m.g	chr2L	62512536	62512577	-	unique
pA_chr3S-231	Xelaev18019753m.g	chr3S	2215496	2215537	-	unique
pA_chr5S-36	Xelaev18029458m.g	chr5S	73306504	73306545	+	unique
pA_chr9_10L-454	Xelaev18044578m.g	chr9_10L	58424061	58424102	-	unique
pA_chr1L-334	Xelaev18005686m.g	chr1L	64373443	64373484	-	unique
pA_chr1L-114	Xelaev18007525m.g	chr1L	149480893	149480934	-	unique
pA_chr1L-354	Xelaev18008208m.g	chr1L	189839010	189839051	-	unique
pA_chr2L-142	Xelaev18012917m.g	chr2L	107783242	107783283	-	unique
pA_chr1S-185	Xelaev18009743m.g	chr1S	84394896	84394937	-	unique
pA_chr6S-58	Xelaev18033202m.g	chr6S	45067472	45067513	+	unique
pA_chr7S-130	Xelaev18037843m.g	chr7S	80069171	80069212	+	unique
pA_chr9_10L-418	Xelaev18044177m.g	chr9_10L	40819741	40819782	+	unique
pA_chr9_10L-141	Xelaev18045057m.g	chr9_10L	84869493	84869534	+	unique
pA_chr4L-320	Xelaev18022837m.g	chr4L	65004134	65004175	+	unique
pA_chr5L-82	Xelaev18026690m.g	chr5L	43219048	43219089	-	unique
pA_chr6L-34	Xelaev18031093m.g	chr6L	48382271	48382312	+	unique
pA_chr6L-63	Xelaev18032026m.g	chr6L	116377398	116377439	+	unique
pA_chr5S-135	Xelaev18029588m.g	chr5S	83504497	83504538	+	unique
pA_chr9_10S-66	Xelaev18046580m.g	chr9_10S	27852906	27852947	-	unique
pA_chr2L-35	Xelaev18012036m.g	chr2L	55511530	55511571	+	unique
pA_chr3L-68	Xelaev18016668m.g	chr3L	2875799	2875840	-	unique
pA_chr3L-179	Xelaev18016995m.g	chr3L	19665081	19665122	+	unique
pA_chr1S-22	Xelaev18010309m.g	chr1S	116820969	116821010	+	unique
pA_chr4S-327	Xelaev18024953m.g	chr4S	45165215	45165256	-	unique
pA_chr8S-101	Xelaev18042567m.g	chr8S	83727808	83727849	+	unique
pA_chr3L-258	Xelaev18018239m.g	chr3L	94565944	94565985	+	unique
pA_chr6L-411	Xelaev18030792m.g	chr6L	24022579	24022620	+	unique
pA_chr8S-74	Xelaev18042168m.g	chr8S	60841353	60841394	-	unique
pA_chr2L-283	Xelaev18013247m.g	chr2L	133401045	133401086	+	unique
pA_chr2L-350	Xelaev18013924m.g	chr2L	172387391	172387432	-	unique
pA_chr3L-128	Xelaev18018498m.g	chr3L	110500254	110500295	+	unique
pA_chr4L-50	Xelaev18023555m.g	chr4L	107796352	107796393	-	unique
pA_chr1S-268	Xelaev18010148m.g	chr1S	109220561	109220602	+	unique
pA_chr2S-59	Xelaev18015177m.g	chr2S	67965577	67965618	-	unique
pA_chr3S-130	Xelaev18020963m.g	chr3S	71088781	71088822	-	unique
pA_chr4S-40	Xelaev18025619m.g	chr4S	91931702	91931743	-	unique
pA_chr5S-46	Xelaev18029741m.g	chr5S	95597517	95597558	+	unique
pA_chr9_10L-24	Xelaev18044054m.g	chr9_10L	36645056	36645097	+	unique
pA_chr9_10L-29	Xelaev18044670m.g	chr9_10L	64858046	64858087	+	unique
pA_chr1L-39	Xelaev18005474m.g	chr1L	48064546	48064587	-	unique
pA_chr1L-161	Xelaev18008230m.g	chr1L	191572349	191572390	-	unique
pA_chr3L-94	Xelaev18017924m.g	chr3L	78152912	78152953	+	unique
pA_chr3L-249	Xelaev18019052m.g	chr3L	132404421	132404462	-	unique
pA_chr6L-168	Xelaev18030705m.g	chr6L	15561853	15561894	-	unique
pA_chr6L-415	Xelaev18030941m.g	chr6L	35728282	35728323	+	unique
pA_chr9_10L-483	Xelaev18044460m.g	chr9_10L	51242118	51242159	+	unique
pA_chr9_10L-66	Xelaev18045182m.g	chr9_10L	91520923	91520964	+	unique
pA_chr1L-50	Xelaev18007465m.g	chr1L	145717194	145717235	-	unique
pA_chr2L-85	Xelaev18012641m.g	chr2L	89079874	89079915	+	unique
pA_chr3L-382	Xelaev18016618m.g	chr3L	1632421	1632462	+	unique
pA_chr3L-24	Xelaev18017339m.g	chr3L	40687471	40687512	-	unique
pA_chr3L-99	Xelaev18018535m.g	chr3L	114039612	114039653	-	unique
pA_chr4L-290	Xelaev18021916m.g	chr4L	10922846	10922887	+	unique
pA_chr1S-464	Xelaev18010999m.g	chr1S	164795191	164795232	+	unique
pA_chr3S-85	Xelaev18021103m.g	chr3S	81321406	81321447	-	unique
pA_chr4S-173	Xelaev18024941m.g	chr4S	44391434	44391475	+	unique
pA_chr5S-311	Xelaev18028863m.g	chr5S	29951302	29951343	-	unique
pA_chr8S-53	Xelaev18042523m.g	chr8S	81917475	81917516	+	unique
pA_chr1L-285	Xelaev18008243m.g	chr1L	192784490	192784531	-	unique
pA_chr1S-54	Xelaev18008938m.g	chr1S	17527583	17527624	-	unique
pA_chr9_10L-393	Xelaev18044711m.g	chr9_10L	66653015	66653056	-	unique
pA_chr3L-224	Xelaev18017610m.g	chr3L	56255033	56255074	+	unique
pA_chr5L-384	Xelaev18027443m.g	chr5L	98240582	98240623	+	unique
pA_chr6L-260	Xelaev18031353m.g	chr6L	67554080	67554121	+	unique
pA_chr1S-38	Xelaev18010944m.g	chr1S	160249390	160249431	-	unique
pA_chr6S-26	Xelaev18032985m.g	chr6S	26227186	26227227	-	unique
pA_chr8S-34	Xelaev18042294m.g	chr8S	72493203	72493244	+	unique
pA_chr9_10L-36	Xelaev18043776m.g	chr9_10L	24393089	24393130	-	unique
pA_chr9_10L-49	Xelaev18044048m.g	chr9_10L	36583434	36583475	+	unique
pA_chr4L-386	Xelaev18023178m.g	chr4L	86599653	86599694	-	unique
pA_chr5L-49	Xelaev18026677m.g	chr5L	41809611	41809652	-	unique
pA_chr8L-165	Xelaev18038261m.g	chr8L	2460346	2460387	+	unique
pA_chr8L-141	Xelaev18040067m.g	chr8L	93580944	93580985	+	unique
pA_chr2S-185	Xelaev18014525m.g	chr2S	30601750	30601791	-	unique
pA_chr4S-67	Xelaev18025198m.g	chr4S	64675879	64675920	-	unique
pA_chr5S-259	Xelaev18029645m.g	chr5S	86778620	86778661	+	unique
pA_chr5S-159	Xelaev18030167m.g	chr5S	128663913	128663954	-	unique
pA_chr6S-153	Xelaev18032706m.g	chr6S	2292547	2292588	+	unique
pA_chr6S-13	Xelaev18033404m.g	chr6S	63841414	63841455	+	unique
pA_chr9_10L-204	Xelaev18043181m.g	chr9_10L	2455380	2455421	-	unique
pA_chr9_10S-101	Xelaev18047423m.g	chr9_10S	76056911	76056952	-	unique
pA_chr3L-184	Xelaev18017850m.g	chr3L	74307101	74307142	-	unique
pA_chr1L-44	Xelaev18007532m.g	chr1L	149956380	149956421	+	unique
pA_chr2L-319	Xelaev18012512m.g	chr2L	82825751	82825792	+	unique
pA_chr3L-243	Xelaev18017703m.g	chr3L	63488909	63488950	+	unique
pA_chr4L-136	Xelaev18023525m.g	chr4L	106967920	106967961	-	unique
pA_chr6L-219	Xelaev18030535m.g	chr6L	3710457	3710498	+	unique
pA_chr8L-220	Xelaev18038127m.g	chr8L	719715	719756	+	unique
pA_chr4S-53	Xelaev18024585m.g	chr4S	19811941	19811982	-	unique
pA_chr4S-213	Xelaev18025750m.g	chr4S	97350603	97350644	+	unique
pA_chr4S-130	Xelaev18025983m.g	chr4S	113018089	113018130	-	unique
pA_chr6S-39	Xelaev18033469m.g	chr6S	68256889	68256930	-	unique
pA_chr7S-20	Xelaev18037361m.g	chr7S	49655925	49655966	+	unique
pA_chr8S-291	Xelaev18041680m.g	chr8S	34228229	34228270	-	unique
pA_chr8S-125	Xelaev18042332m.g	chr8S	75344250	75344291	+	unique
pA_chr1L-55	Xelaev18005894m.g	chr1L	78081777	78081818	+	unique
pA_chr2L-370	Xelaev18013576m.g	chr2L	148944458	148944499	+	unique
pA_chr3L-274	Xelaev18017896m.g	chr3L	77273409	77273450	+	unique
pA_chr6L-148	Xelaev18031149m.g	chr6L	51785708	51785749	+	unique
pA_chr8L-106	Xelaev18038567m.g	chr8L	16691096	16691137	+	unique
pA_chr5S-44	Xelaev18029553m.g	chr5S	82112398	82112439	-	unique
pA_chr9_10S-22	Xelaev18047702m.g	chr9_10S	94168275	94168316	-	unique
pA_chr3L-520	Xelaev18018269m.g	chr3L	95605104	95605145	+	unique
pA_chr5L-34	Xelaev18027557m.g	chr5L	105127800	105127841	-	unique
pA_chr2S-93	Xelaev18015180m.g	chr2S	68074673	68074714	-	unique
pA_chr3S-176	Xelaev18020043m.g	chr3S	15301274	15301315	+	unique
pA_chr5S-115	Xelaev18030116m.g	chr5S	124046240	124046281	-	unique
pA_chr9_10L-379	Xelaev18043636m.g	chr9_10L	18312446	18312487	-	unique
pA_chr1L-474	Xelaev18008186m.g	chr1L	188721610	188721651	-	unique
pA_chr2L-99	Xelaev18012187m.g	chr2L	62504948	62504989	+	unique
pA_chr4L-56	Xelaev18023992m.g	chr4L	129728989	129729030	-	unique
pA_chr1S-69	Xelaev18010357m.g	chr1S	118175667	118175708	-	unique
pA_chr5S-26	Xelaev18029030m.g	chr5S	42267706	42267747	+	unique
pA_chr1L-333	Xelaev18005628m.g	chr1L	60129565	60129606	+	unique
pA_chr6L-125	Xelaev18030680m.g	chr6L	13551937	13551978	+	unique
pA_chr6L-60	Xelaev18032227m.g	chr6L	130438475	130438516	+	unique
pA_chr2S-156	Xelaev18014885m.g	chr2S	55969604	55969645	-	unique
pA_chr7S-151	Xelaev18037818m.g	chr7S	79430080	79430121	-	unique
pA_chr8S-250	Xelaev18041077m.g	chr8S	5002174	5002215	+	unique
pA_chr9_10S-118	Xelaev18046995m.g	chr9_10S	46007172	46007213	+	unique
pA_chr3L-158	Xelaev18016786m.g	chr3L	6637657	6637698	-	unique
pA_chr3L-226	Xelaev18017754m.g	chr3L	67659124	67659165	+	unique
pA_chr3L-108	Xelaev18017872m.g	chr3L	75316407	75316448	-	unique
pA_chr4L-69	Xelaev18024033m.g	chr4L	132069086	132069127	-	unique
pA_chr1S-471	Xelaev18009018m.g	chr1S	26113070	26113111	+	unique
pA_chr2S-215	Xelaev18016535m.g	chr2S	158791396	158791437	-	unique
pA_chr7S-137	Xelaev18037778m.g	chr7S	77649227	77649268	-	unique
pA_chr8S-192	Xelaev18041408m.g	chr8S	26373335	26373376	-	unique
pA_chr1L-217	Xelaev18008469m.g	chr1L	211152387	211152428	+	unique
pA_chr2L-416	Xelaev18013345m.g	chr2L	138113071	138113112	-	unique
pA_chr4L-131	Xelaev18022848m.g	chr4L	65229493	65229534	-	unique
pA_chr8L-224	Xelaev18038541m.g	chr8L	15831029	15831070	+	unique
pA_chr8L-70	Xelaev18039102m.g	chr8L	50201863	50201904	-	unique
pA_chr2S-57	Xelaev18014570m.g	chr2S	33624174	33624215	-	unique
pA_chr3S-93	Xelaev18020604m.g	chr3S	48400479	48400520	+	unique
pA_chr5S-61	Xelaev18028635m.g	chr5S	12249459	12249500	+	unique
pA_chr8S-263	Xelaev18042570m.g	chr8S	83781115	83781156	-	unique
pA_chr9_10L-110	Xelaev18045525m.g	chr9_10L	110300284	110300325	-	unique
pA_chr9_10S-27	Xelaev18047848m.g	chr9_10S	101475197	101475238	+	unique
pA_chr1L-373	Xelaev18006966m.g	chr1L	134458639	134458680	+	unique
pA_chr4L-31	Xelaev18021913m.g	chr4L	10823274	10823315	-	unique
pA_chr5L-120	Xelaev18027826m.g	chr5L	124265311	124265352	+	unique
pA_chr1S-30	Xelaev18011028m.g	chr1S	167636875	167636916	+	unique
pA_chr2S-270	Xelaev18015288m.g	chr2S	75285640	75285681	+	unique
pA_chr3S-55	Xelaev18019976m.g	chr3S	11451390	11451431	+	unique
pA_chr3L-267	Xelaev18017344m.g	chr3L	40849342	40849383	-	unique
pA_chr3L-212	Xelaev18018366m.g	chr3L	100517273	100517314	-	unique
pA_chr1S-340	Xelaev18010848m.g	chr1S	153805597	153805638	+	unique
pA_chr2S-76	Xelaev18014202m.g	chr2S	7053790	7053831	+	unique
pA_chr2S-446	Xelaev18016180m.g	chr2S	137114339	137114380	+	unique
pA_chr3S-222	Xelaev18020744m.g	chr3S	57554982	57555023	-	unique
pA_chr5S-34	Xelaev18028640m.g	chr5S	12350176	12350217	-	unique
pA_chr5S-113	Xelaev18030077m.g	chr5S	119008553	119008594	+	unique
pA_chr5S-30	Xelaev18030319m.g	chr5S	136165651	136165692	-	unique
pA_chr3L-203	Xelaev18019513m.g	chr3L	141517142	141517183	-	unique
pA_chr5L-223	Xelaev18026187m.g	chr5L	10319945	10319986	+	unique
pA_chr5L-53	Xelaev18027802m.g	chr5L	123673145	123673186	+	unique
pA_chr7L-91	Xelaev18035806m.g	chr7L	95570638	95570679	+	unique
pA_chr8L-237	Xelaev18040789m.g	chr8L	116932963	116933004	-	unique
pA_chr3S-270	Xelaev18020916m.g	chr3S	66114894	66114935	+	unique
pA_chr8S-111	Xelaev18042484m.g	chr8S	79991972	79992013	-	unique
pA_chr2L-160	Xelaev18011834m.g	chr2L	42239170	42239211	+	unique
pA_chr2L-121	Xelaev18013361m.g	chr2L	138536569	138536610	+	unique
pA_chr6L-55	Xelaev18031421m.g	chr6L	71628492	71628533	-	unique
pA_chr6L-30	Xelaev18031595m.g	chr6L	86277086	86277127	-	unique
pA_chr6L-268	Xelaev18032570m.g	chr6L	155033492	155033533	+	unique
pA_chr8L-11	Xelaev18039489m.g	chr8L	60622770	60622811	-	unique
pA_chr2S-117	Xelaev18016337m.g	chr2S	149634365	149634406	+	unique
pA_chr6S-71	Xelaev18033718m.g	chr6S	91858678	91858719	-	unique
pA_chr9_10S-125	Xelaev18046358m.g	chr9_10S	16941454	16941495	+	unique
pA_chr7L-83	Xelaev18036130m.g	chr7L	108915856	108915897	-	unique
pA_chr8L-159	Xelaev18039271m.g	chr8L	55177340	55177381	-	unique
pA_chr3S-128	Xelaev18020403m.g	chr3S	34772733	34772774	+	unique
pA_chr5S-155	Xelaev18029652m.g	chr5S	87029655	87029696	+	unique
pA_chr9_10L-169	Xelaev18044370m.g	chr9_10L	46528587	46528628	-	unique
pA_chr2L-199	Xelaev18011839m.g	chr2L	42329155	42329196	+	unique
pA_chr2L-184	Xelaev18013758m.g	chr2L	159150893	159150934	-	unique
pA_chr3L-146	Xelaev18018813m.g	chr3L	124382694	124382735	-	unique
pA_chr7L-69	Xelaev18035689m.g	chr7L	88607304	88607345	+	unique
pA_chr8L-99	Xelaev18039667m.g	chr8L	72121458	72121499	+	unique
pA_chr1S-127	Xelaev18009826m.g	chr1S	86966861	86966902	+	unique
pA_chr2S-171	Xelaev18016183m.g	chr2S	137192764	137192805	-	unique
pA_chr5S-35	Xelaev18029125m.g	chr5S	49743224	49743265	+	unique
pA_chr6S-235	Xelaev18033356m.g	chr6S	59418825	59418866	-	unique
pA_chr9_10L-186	Xelaev18043612m.g	chr9_10L	18000167	18000208	-	unique
pA_chr2L-58	Xelaev18012617m.g	chr2L	88341195	88341236	-	unique
pA_chr7L-146	Xelaev18036460m.g	chr7L	122285757	122285798	+	unique
pA_chr2S-55	Xelaev18015968m.g	chr2S	125055044	125055085	-	unique
pA_chr4S-59	Xelaev18024395m.g	chr4S	9619295	9619336	-	unique
pA_chr4S-193	Xelaev18025392m.g	chr4S	77739773	77739814	+	unique
pA_chr6S-47	Xelaev18033962m.g	chr6S	114473798	114473839	+	unique
pA_chr7S-60	Xelaev18036771m.g	chr7S	5800529	5800570	+	unique
pA_chr1L-292	Xelaev18006096m.g	chr1L	89392676	89392717	+	unique
pA_chr1L-158	Xelaev18006589m.g	chr1L	109624490	109624531	-	unique
pA_chr1L-139	Xelaev18007781m.g	chr1L	161752490	161752531	-	unique
pA_chr2L-388	Xelaev18012685m.g	chr2L	91968643	91968684	-	unique
pA_chr5L-33	Xelaev18028014m.g	chr5L	134946471	134946512	+	unique
pA_chr4S-77	Xelaev18024184m.g	chr4S	1027213	1027254	+	unique
pA_chr9_10L-408	Xelaev18043248m.g	chr9_10L	4043564	4043605	+	unique
pA_chr9_10L-100	Xelaev18043844m.g	chr9_10L	29293043	29293084	-	unique
pA_chr4L-313	Xelaev18024072m.g	chr4L	134808617	134808658	+	unique
pA_chr5L-489	Xelaev18027821m.g	chr5L	124185322	124185363	+	unique
pA_chr3S-120	Xelaev18020178m.g	chr3S	22354343	22354384	-	unique
pA_chr4S-78	Xelaev18024282m.g	chr4S	3564435	3564476	+	unique
pA_chr9_10L-306	Xelaev18044384m.g	chr9_10L	47043956	47043997	-	unique
pA_chr3L-265	Xelaev18017216m.g	chr3L	33321096	33321137	-	unique
pA_chr3L-281	Xelaev18018941m.g	chr3L	127320178	127320219	-	unique
pA_chr3S-46	Xelaev18021286m.g	chr3S	95217659	95217700	-	unique
pA_chr1L-250	Xelaev18007849m.g	chr1L	163688651	163688692	-	unique
pA_chr3L-322	Xelaev18018890m.g	chr3L	126081944	126081985	-	unique
pA_chr1S-176	Xelaev18010480m.g	chr1S	125506024	125506065	-	unique
pA_chr1S-216	Xelaev18010865m.g	chr1S	154814142	154814183	+	unique
pA_chr2S-62	Xelaev18014937m.g	chr2S	58028613	58028654	+	unique
pA_chr4S-143	Xelaev18025019m.g	chr4S	50774226	50774267	-	unique
pA_chr8S-128	Xelaev18041224m.g	chr8S	13496611	13496652	+	unique
pA_chr9_10L-221	Xelaev18044270m.g	chr9_10L	43935636	43935677	-	unique
pA_chr9_10S-30	Xelaev18047090m.g	chr9_10S	53189155	53189196	+	unique
pA_chr1L-136	Xelaev18005863m.g	chr1L	76608427	76608468	+	unique
pA_chr1L-128	Xelaev18007472m.g	chr1L	146005745	146005786	+	unique
pA_chr3L-172	Xelaev18018084m.g	chr3L	84756924	84756965	+	unique
pA_chr4L-234	Xelaev18023803m.g	chr4L	119381636	119381677	-	unique
pA_chr5L-56	Xelaev18026736m.g	chr5L	47865213	47865254	+	unique
pA_chr8L-111	Xelaev18039859m.g	chr8L	82159024	82159065	-	unique
pA_chr1S-114	Xelaev18010464m.g	chr1S	125152299	125152340	+	unique
pA_chr2S-351	Xelaev18015821m.g	chr2S	118676667	118676708	+	unique
pA_chr9_10L-303	Xelaev18044168m.g	chr9_10L	40484143	40484184	-	unique
pA_chr1L-389	Xelaev18006334m.g	chr1L	99855280	99855321	-	unique
pA_chr1L-104	Xelaev18006943m.g	chr1L	133074102	133074143	+	unique
pA_chr2L-361	Xelaev18012089m.g	chr2L	57982712	57982753	-	unique
pA_chr4L-52	Xelaev18023959m.g	chr4L	127269269	127269310	-	unique
pA_chr8L-18	Xelaev18038639m.g	chr8L	21467397	21467438	-	unique
pA_chr4S-31	Xelaev18025652m.g	chr4S	93845689	93845730	+	unique
pA_chr9_10L-307	Xelaev18044520m.g	chr9_10L	52864828	52864869	-	unique
pA_chr2L-238	Xelaev18011801m.g	chr2L	40994952	40994993	+	unique
pA_chr3L-79	Xelaev18017115m.g	chr3L	24758905	24758946	-	unique
pA_chr7L-26	Xelaev18035687m.g	chr7L	88552664	88552705	-	unique
pA_chr8L-155	Xelaev18039851m.g	chr8L	81819600	81819641	-	unique
pA_chr2S-56	Xelaev18014144m.g	chr2S	3763867	3763908	-	unique
pA_chr5S-21	Xelaev18029413m.g	chr5S	70356514	70356555	-	unique
pA_chr1L-234	Xelaev18008145m.g	chr1L	186225244	186225285	+	unique
pA_chr1L-117	Xelaev18008170m.g	chr1L	187711958	187711999	+	unique
pA_chr2L-510	Xelaev18011695m.g	chr2L	32999267	32999308	-	unique
pA_chr3L-510	Xelaev18017458m.g	chr3L	47571407	47571448	-	unique
pA_chr4L-123	Xelaev18023014m.g	chr4L	75848232	75848273	+	unique
pA_chr5L-238	Xelaev18026427m.g	chr5L	23858731	23858772	+	unique
pA_chr8L-67	Xelaev18038786m.g	chr8L	28849597	28849638	+	unique
pA_chr8L-256	Xelaev18039822m.g	chr8L	80383079	80383120	-	unique
pA_chr1S-363	Xelaev18010507m.g	chr1S	126300015	126300056	-	unique
pA_chr5S-25	Xelaev18029687m.g	chr5S	89690369	89690410	-	unique
pA_chr8S-63	Xelaev18041770m.g	chr8S	37408106	37408147	+	unique
pA_chr9_10S-131	Xelaev18047720m.g	chr9_10S	94979121	94979162	+	unique
pA_chr3L-135	Xelaev18018649m.g	chr3L	119414838	119414879	-	unique
pA_chr4L-41	Xelaev18021907m.g	chr4L	10664229	10664270	-	unique
pA_chr6L-228	Xelaev18031816m.g	chr6L	102790557	102790598	-	unique
pA_chr8L-74	Xelaev18038376m.g	chr8L	6883215	6883256	+	unique
pA_chr1S-246	Xelaev18010908m.g	chr1S	157387328	157387369	-	unique
pA_chr2S-302	Xelaev18015128m.g	chr2S	65318163	65318204	-	unique
pA_chr4S-85	Xelaev18024972m.g	chr4S	48835974	48836015	+	unique
pA_chr5S-66	Xelaev18028616m.g	chr5S	11551088	11551129	-	unique
pA_chr7S-138	Xelaev18036788m.g	chr7S	7613817	7613858	+	unique
pA_chr7S-17	Xelaev18036927m.g	chr7S	18674551	18674592	-	unique
pA_chr9_10L-50	Xelaev18044325m.g	chr9_10L	45231948	45231989	+	unique
pA_chr4L-266	Xelaev18022228m.g	chr4L	25723881	25723922	+	unique
pA_chr7L-36	Xelaev18035897m.g	chr7L	98655110	98655151	+	unique
pA_chr3S-45	Xelaev18020793m.g	chr3S	59610391	59610432	+	unique
pA_chr4S-60	Xelaev18025701m.g	chr4S	95339227	95339268	-	unique
pA_chr5S-32	Xelaev18028492m.g	chr5S	1683493	1683534	-	unique
pA_chr9_10S-166	Xelaev18046130m.g	chr9_10S	7601738	7601779	-	unique
pA_chr2L-298	Xelaev18012542m.g	chr2L	84301646	84301687	-	unique
pA_chr4L-239	Xelaev18022212m.g	chr4L	24975634	24975675	-	unique
pA_chr4L-154	Xelaev18023070m.g	chr4L	79984391	79984432	-	unique
pA_chr8S-210	Xelaev18042021m.g	chr8S	52031352	52031393	+	unique
pA_chr1L-685	Xelaev18007378m.g	chr1L	142565401	142565442	+	unique
pA_chr1S-169	Xelaev18008998m.g	chr1S	25159109	25159150	-	unique
pA_chr2S-87	Xelaev18015505m.g	chr2S	92576246	92576287	+	unique
pA_chr5S-102	Xelaev18029019m.g	chr5S	41760817	41760858	-	unique
pA_chr5S-86	Xelaev18029827m.g	chr5S	102025260	102025301	-	unique
pA_chr8S-89	Xelaev18042085m.g	chr8S	55970006	55970047	-	unique
pA_chr8S-31	Xelaev18042323m.g	chr8S	75020883	75020924	+	unique
pA_chr4L-83	Xelaev18022054m.g	chr4L	17625965	17626006	-	unique
pA_chr4S-136	Xelaev18025576m.g	chr4S	88721922	88721963	-	unique
pA_chr9_10S-120	Xelaev18047509m.g	chr9_10S	82108855	82108896	+	unique
pA_chr9_10S-215	Xelaev18047520m.g	chr9_10S	83116751	83116792	-	unique
pA_chr1L-92	Xelaev18006603m.g	chr1L	110176625	110176666	+	unique
pA_chr1L-323	Xelaev18007619m.g	chr1L	152835514	152835555	-	unique
pA_chr1L-69	Xelaev18008248m.g	chr1L	193297264	193297305	+	unique
pA_chr4L-60	Xelaev18023860m.g	chr4L	121868173	121868214	-	unique
pA_chr5L-43	Xelaev18027502m.g	chr5L	102065692	102065733	+	unique
pA_chr6L-83	Xelaev18031820m.g	chr6L	102972536	102972577	-	unique
pA_chr8L-336	Xelaev18039391m.g	chr8L	58490332	58490373	-	unique
pA_chr9_10L-154	Xelaev18043252m.g	chr9_10L	4199591	4199632	+	unique
pA_chr1L-107	Xelaev18007714m.g	chr1L	155602287	155602328	+	unique
pA_chr5L-130	Xelaev18028044m.g	chr5L	138429908	138429949	-	unique
pA_chr6L-205	Xelaev18031311m.g	chr6L	63794784	63794825	-	unique
pA_chr8L-185	Xelaev18038981m.g	chr8L	45508668	45508709	-	unique
pA_chr4S-88	Xelaev18025514m.g	chr4S	86376729	86376770	-	unique
pA_chr6S-115	Xelaev18033241m.g	chr6S	48572172	48572213	-	unique
pA_chr9_10S-86	Xelaev18047679m.g	chr9_10S	93451039	93451080	-	unique
pA_chr3L-93	Xelaev18017747m.g	chr3L	67401926	67401967	-	unique
pA_chr3L-97	Xelaev18018139m.g	chr3L	87201018	87201059	+	unique
pA_chr5L-38	Xelaev18027733m.g	chr5L	118105409	118105450	+	unique
pA_chr1S-73	Xelaev18008771m.g	chr1S	3680495	3680536	+	unique
pA_chr3S-41	Xelaev18021033m.g	chr3S	75857967	75858008	-	unique
pA_chr4S-83	Xelaev18024356m.g	chr4S	7487463	7487504	-	unique
pA_chr5S-332	Xelaev18028477m.g	chr5S	1005814	1005855	-	unique
pA_chr9_10L-230	Xelaev18043758m.g	chr9_10L	23927124	23927165	-	unique
pA_chr2L-226	Xelaev18012600m.g	chr2L	87842162	87842203	+	unique
pA_chr3L-42	Xelaev18018309m.g	chr3L	98003571	98003612	-	unique
pA_chr4L-88	Xelaev18022123m.g	chr4L	21974582	21974623	+	unique
pA_chr7L-124	Xelaev18034807m.g	chr7L	34595591	34595632	-	unique
pA_chr1S-374	Xelaev18009212m.g	chr1S	43337354	43337395	+	unique
pA_chr1S-101	Xelaev18009641m.g	chr1S	78075227	78075268	+	unique
pA_chr5S-65	Xelaev18029032m.g	chr5S	42285848	42285889	-	unique
pA_chr9_10S-91	Xelaev18046454m.g	chr9_10S	22742317	22742358	+	unique
pA_chr1L-315	Xelaev18006248m.g	chr1L	97060503	97060544	-	unique
pA_chr1L-837	Xelaev18006617m.g	chr1L	110618087	110618128	+	unique
pA_chr4L-70	Xelaev18021868m.g	chr4L	8874846	8874887	+	unique
pA_chr4L-166	Xelaev18022224m.g	chr4L	25634082	25634123	-	unique
pA_chr7L-64	Xelaev18035687m.g	chr7L	88552809	88552850	-	unique
pA_chr2S-124	Xelaev18016245m.g	chr2S	141364266	141364307	-	unique
pA_chr4S-115	Xelaev18025631m.g	chr4S	92520892	92520933	+	unique
pA_chr5S-163	Xelaev18028531m.g	chr5S	6084439	6084480	+	unique
pA_chr5S-42	Xelaev18028650m.g	chr5S	12852618	12852659	+	unique
pA_chr9_10S-421	Xelaev18046277m.g	chr9_10S	15214687	15214728	-	unique
pA_chr1L-288	Xelaev18005180m.g	chr1L	24380710	24380751	-	unique
pA_chr3L-48	Xelaev18018205m.g	chr3L	92330787	92330828	-	unique
pA_chr5L-52	Xelaev18026692m.g	chr5L	43242780	43242821	-	unique
pA_chr5L-343	Xelaev18027977m.g	chr5L	131804480	131804521	+	unique
pA_chr2S-539	Xelaev18015696m.g	chr2S	107240405	107240446	-	unique
pA_chr2S-610	Xelaev18015849m.g	chr2S	119771417	119771458	-	unique
pA_chr7S-113	Xelaev18037564m.g	chr7S	65057587	65057628	+	unique
pA_chr8S-108	Xelaev18041327m.g	chr8S	21500834	21500875	+	unique
pA_chr1L-168	Xelaev18006673m.g	chr1L	112552773	112552814	-	unique
pA_chr1L-374	Xelaev18007480m.g	chr1L	146443327	146443368	-	unique
pA_chr2L-73	Xelaev18011255m.g	chr2L	1789982	1790023	-	unique
pA_chr4L-360	Xelaev18023474m.g	chr4L	103689988	103690029	-	unique
pA_chr4L-246	Xelaev18023539m.g	chr4L	107487796	107487837	+	unique
pA_chr4L-113	Xelaev18023889m.g	chr4L	122639197	122639238	-	unique
pA_chr6L-69	Xelaev18031972m.g	chr6L	112155973	112156014	-	unique
pA_chr3L-214	Xelaev18019105m.g	chr3L	133681410	133681451	+	unique
pA_chr4L-72	Xelaev18022112m.g	chr4L	21727057	21727098	+	unique
pA_chr4L-109	Xelaev18022566m.g	chr4L	42752751	42752792	-	unique
pA_chr5L-261	Xelaev18027946m.g	chr5L	129331578	129331619	+	unique
pA_chr2S-395	Xelaev18014219m.g	chr2S	8140034	8140075	+	unique
pA_chr2S-40	Xelaev18014576m.g	chr2S	33877921	33877962	+	unique
pA_chr6S-33	Xelaev18032794m.g	chr6S	7009351	7009392	+	unique
pA_chr8S-226	Xelaev18042102m.g	chr8S	56484358	56484399	+	unique
pA_chr1L-122	Xelaev18005352m.g	chr1L	37443272	37443313	-	unique
pA_chr5L-217	Xelaev18027774m.g	chr5L	121824925	121824966	+	unique
pA_chr8L-131	Xelaev18040928m.g	chr8L	119241107	119241148	-	unique
pA_chr1S-116	Xelaev18010763m.g	chr1S	144163844	144163885	+	unique
pA_chr2S-276	Xelaev18015656m.g	chr2S	103173929	103173970	-	unique
pA_chr2S-27	Xelaev18016058m.g	chr2S	129821980	129822021	-	unique
pA_chr2S-90	Xelaev18016239m.g	chr2S	141157985	141158026	-	unique
pA_chr4S-56	Xelaev18025224m.g	chr4S	66123217	66123258	-	unique
pA_chr9_10L-284	Xelaev18043916m.g	chr9_10L	32383188	32383229	+	unique
pA_chr3L-32	Xelaev18017421m.g	chr3L	44361481	44361522	+	unique
pA_chr4L-169	Xelaev18022748m.g	chr4L	58142638	58142679	-	unique
pA_chr5L-152	Xelaev18027927m.g	chr5L	128581758	128581799	+	unique
pA_chr7L-106	Xelaev18034782m.g	chr7L	33746364	33746405	+	unique
pA_chr8L-110	Xelaev18039847m.g	chr8L	81709472	81709513	-	unique
pA_chr8L-91	Xelaev18040652m.g	chr8L	113065857	113065898	-	unique
pA_chr1S-359	Xelaev18010325m.g	chr1S	117105209	117105250	+	unique
pA_chr5S-166	Xelaev18029035m.g	chr5S	42432926	42432967	+	unique
pA_chr5S-121	Xelaev18029961m.g	chr5S	110419024	110419065	+	unique
pA_chr6S-41	Xelaev18033799m.g	chr6S	98216614	98216655	+	unique
pA_chr2L-107	Xelaev18012051m.g	chr2L	56755571	56755612	-	unique
pA_chr4L-147	Xelaev18023974m.g	chr4L	127898317	127898358	-	unique
pA_chr8L-216	Xelaev18039797m.g	chr8L	78929969	78930010	+	unique
pA_chr2S-254	Xelaev18015607m.g	chr2S	98806918	98806959	-	unique
pA_chr3S-136	Xelaev18019955m.g	chr3S	10449444	10449485	+	unique
pA_chr3S-76	Xelaev18020648m.g	chr3S	52185378	52185419	-	unique
pA_chr9_10L-316	Xelaev18043370m.g	chr9_10L	7500173	7500214	+	unique
pA_chr9_10S-64	Xelaev18046511m.g	chr9_10S	25648102	25648143	-	unique
pA_chr9_10S-78	Xelaev18047163m.g	chr9_10S	59638073	59638114	-	unique
pA_chr1L-150	Xelaev18008085m.g	chr1L	181543892	181543933	+	unique
pA_chr2L-279	Xelaev18012818m.g	chr2L	99909538	99909579	+	unique
pA_chr4L-71	Xelaev18024058m.g	chr4L	133753276	133753317	+	unique
pA_chr8L-93	Xelaev18038650m.g	chr8L	21754158	21754199	-	unique
pA_chr8L-68	Xelaev18038841m.g	chr8L	33684034	33684075	-	unique
pA_chr6S-78	Xelaev18032900m.g	chr6S	18596133	18596174	+	unique
pA_chr9_10L-44	Xelaev18043184m.g	chr9_10L	2506595	2506636	+	unique
pA_chr1L-68	Xelaev18007829m.g	chr1L	163175933	163175974	+	unique
pA_chr4L-228	Xelaev18022851m.g	chr4L	65305978	65306019	+	unique
pA_chr1S-157	Xelaev18009645m.g	chr1S	78254467	78254508	-	unique
pA_chr5S-263	Xelaev18029881m.g	chr5S	106704087	106704128	+	unique
pA_chr3L-85	Xelaev18017560m.g	chr3L	52357308	52357349	+	unique
pA_chr6L-215	Xelaev18032311m.g	chr6L	138926354	138926395	-	unique
pA_chr8S-137	Xelaev18041630m.g	chr8S	32649041	32649082	+	unique
pA_chr2L-125	Xelaev18011671m.g	chr2L	31235178	31235219	+	unique
pA_chr3L-76	Xelaev18019095m.g	chr3L	133279393	133279434	+	unique
pA_chr7L-125	Xelaev18034851m.g	chr7L	36579205	36579246	-	unique
pA_chr1S-152	Xelaev18009734m.g	chr1S	84060466	84060507	+	unique
pA_chr2S-281	Xelaev18014185m.g	chr2S	6320072	6320113	+	unique
pA_chr2S-204	Xelaev18014912m.g	chr2S	57010057	57010098	+	unique
pA_chr5S-81	Xelaev18028873m.g	chr5S	30335729	30335770	-	unique
pA_chr7S-49	Xelaev18037636m.g	chr7S	71555418	71555459	+	unique
pA_chr7S-82	Xelaev18037988m.g	chr7S	86908847	86908888	-	unique
pA_chr2L-129	Xelaev18012459m.g	chr2L	79641470	79641511	+	unique
pA_chr3L-50	Xelaev18016888m.g	chr3L	11865472	11865513	-	unique
pA_chr3L-95	Xelaev18019092m.g	chr3L	133209934	133209975	+	unique
pA_chr5L-259	Xelaev18027736m.g	chr5L	118803287	118803328	-	unique
pA_chr8L-104	Xelaev18038218m.g	chr8L	1972335	1972376	+	unique
pA_chr8L-175	Xelaev18039552m.g	chr8L	65134191	65134232	+	unique
pA_chr2S-406	Xelaev18015259m.g	chr2S	73774392	73774433	-	unique
pA_chr2S-95	Xelaev18016136m.g	chr2S	133128126	133128167	+	unique
pA_chr9_10L-642	Xelaev18045321m.g	chr9_10L	100408647	100408688	-	unique
pA_chr1L-63	Xelaev18006011m.g	chr1L	85424344	85424385	+	unique
pA_chr2L-116	Xelaev18011811m.g	chr2L	41483644	41483685	-	unique
pA_chr7L-119	Xelaev18036390m.g	chr7L	119802927	119802968	+	unique
pA_chr1S-75	Xelaev18009938m.g	chr1S	90875581	90875622	-	unique
pA_chr1S-34	Xelaev18010884m.g	chr1S	156303869	156303910	+	unique
pA_chr2S-153	Xelaev18014151m.g	chr2S	4060635	4060676	+	unique
pA_chr5S-15	Xelaev18029315m.g	chr5S	62435001	62435042	+	unique
pA_chr5S-318	Xelaev18029556m.g	chr5S	82158264	82158305	-	unique
pA_chr9_10L-84	Xelaev18043948m.g	chr9_10L	33693540	33693581	+	unique
pA_chr4L-37	Xelaev18022226m.g	chr4L	25657096	25657137	-	unique
pA_chr7S-119	Xelaev18037260m.g	chr7S	39628159	39628200	+	unique
pA_chr9_10L-92	Xelaev18045328m.g	chr9_10L	100691077	100691118	-	unique
pA_chr1L-408	Xelaev18005683m.g	chr1L	64147300	64147341	-	unique
pA_chr1L-399	Xelaev18008035m.g	chr1L	177491848	177491889	-	unique
pA_chr2L-103	Xelaev18011218m.g	chr2L	957052	957093	-	unique
pA_chr2L-138	Xelaev18012116m.g	chr2L	59060531	59060572	-	unique
pA_chr3L-278	Xelaev18018277m.g	chr3L	95848439	95848480	-	unique
pA_chr3L-103	Xelaev18018359m.g	chr3L	100120498	100120539	+	unique
pA_chr4L-133	Xelaev18023073m.g	chr4L	80058943	80058984	-	unique
pA_chr5L-110	Xelaev18027555m.g	chr5L	105108831	105108872	-	unique
pA_chr8L-215	Xelaev18039792m.g	chr8L	78583619	78583660	-	unique
pA_chr3S-137	Xelaev18020123m.g	chr3S	20690255	20690296	+	unique
pA_chr3S-89	Xelaev18020244m.g	chr3S	25170557	25170598	-	unique
pA_chr3S-508	Xelaev18021192m.g	chr3S	88115919	88115960	+	unique
pA_chr5S-162	Xelaev18028479m.g	chr5S	1069762	1069803	-	unique
pA_chr5S-242	Xelaev18029847m.g	chr5S	104689202	104689243	+	unique
pA_chr7S-83	Xelaev18037118m.g	chr7S	30109870	30109911	-	unique
pA_chr1L-119	Xelaev18008227m.g	chr1L	191512940	191512981	-	unique
pA_chr2L-108	Xelaev18012274m.g	chr2L	66763205	66763246	+	unique
pA_chr2L-241	Xelaev18012423m.g	chr2L	78178521	78178562	-	unique
pA_chr3L-496	Xelaev18018637m.g	chr3L	119092618	119092659	+	unique
pA_chr4L-301	Xelaev18023084m.g	chr4L	80411685	80411726	+	unique
pA_chr5L-529	Xelaev18027911m.g	chr5L	127735248	127735289	-	unique
pA_chr8L-132	Xelaev18038559m.g	chr8L	16531737	16531778	-	unique
pA_chr8L-34	Xelaev18039747m.g	chr8L	76270561	76270602	+	unique
pA_chr1S-241	Xelaev18010254m.g	chr1S	115819381	115819422	+	unique
pA_chr3S-320	Xelaev18021607m.g	chr3S	118495839	118495880	+	unique
pA_chr4S-70	Xelaev18024185m.g	chr4S	1039426	1039467	+	unique
pA_chr6S-382	Xelaev18033637m.g	chr6S	85732905	85732946	-	unique
pA_chr7S-111	Xelaev18036917m.g	chr7S	18143495	18143536	+	unique
pA_chr9_10S-43	Xelaev18047844m.g	chr9_10S	101396520	101396561	+	unique
pA_chr1L-709	Xelaev18005215m.g	chr1L	28061185	28061226	-	unique
pA_chr1L-456	Xelaev18005638m.g	chr1L	60719554	60719595	-	unique
pA_chr2L-269	Xelaev18011271m.g	chr2L	2196011	2196052	+	unique
pA_chr2L-219	Xelaev18013287m.g	chr2L	135875371	135875412	+	unique
pA_chr3L-122	Xelaev18017283m.g	chr3L	38394712	38394753	-	unique
pA_chr3L-228	Xelaev18017897m.g	chr3L	77277456	77277497	-	unique
pA_chr7L-110	Xelaev18035666m.g	chr7L	87733332	87733373	+	unique
pA_chr8L-33	Xelaev18039128m.g	chr8L	50704925	50704966	+	unique
pA_chr4L-599	Xelaev18023377m.g	chr4L	97872578	97872619	+	unique
pA_chr5L-394	Xelaev18028191m.g	chr5L	149399765	149399806	-	unique
pA_chr6L-146	Xelaev18031001m.g	chr6L	39866995	39867036	-	unique
pA_chr6L-109	Xelaev18031169m.g	chr6L	53078468	53078509	-	unique
pA_chr6L-230	Xelaev18031991m.g	chr6L	113768853	113768894	+	unique
pA_chr8L-78	Xelaev18038368m.g	chr8L	6756407	6756448	-	unique
pA_chr2S-79	Xelaev18014716m.g	chr2S	44451124	44451165	+	unique
pA_chr2S-50	Xelaev18016042m.g	chr2S	129364444	129364485	+	unique
pA_chr4S-93	Xelaev18025743m.g	chr4S	96950383	96950424	+	unique
pA_chr1L-38	Xelaev18005181m.g	chr1L	24456813	24456854	+	unique
pA_chr2L-574	Xelaev18013402m.g	chr2L	139980713	139980754	-	unique
pA_chr4L-81	Xelaev18023606m.g	chr4L	111409247	111409288	+	unique
pA_chr6L-75	Xelaev18031821m.g	chr6L	102994171	102994212	+	unique
pA_chr7L-108	Xelaev18035411m.g	chr7L	73804963	73805004	+	unique
pA_chr7L-437	Xelaev18035652m.g	chr7L	87094649	87094690	-	unique
pA_chr8L-56	Xelaev18039908m.g	chr8L	85072283	85072324	-	unique
pA_chr1S-35	Xelaev18008978m.g	chr1S	22227884	22227925	+	unique
pA_chr1S-319	Xelaev18010711m.g	chr1S	138853529	138853570	-	unique
pA_chr2S-110	Xelaev18016558m.g	chr2S	159321746	159321787	+	unique
pA_chr2L-126	Xelaev18011820m.g	chr2L	41896327	41896368	+	unique
pA_chr3L-145	Xelaev18018499m.g	chr3L	110517385	110517426	+	unique
pA_chr7L-98	Xelaev18035497m.g	chr7L	77802933	77802974	+	unique
pA_chr1S-122	Xelaev18008988m.g	chr1S	24575050	24575091	-	unique
pA_chr1L-82	Xelaev18006642m.g	chr1L	111381255	111381296	+	unique
pA_chr1L-301	Xelaev18007971m.g	chr1L	171428813	171428854	-	unique
pA_chr3L-141	Xelaev18018169m.g	chr3L	89782308	89782349	-	unique
pA_chr3L-81	Xelaev18018494m.g	chr3L	109959921	109959962	+	unique
pA_chr3L-280	Xelaev18018631m.g	chr3L	118860264	118860305	-	unique
pA_chr3L-400	Xelaev18018731m.g	chr3L	121673708	121673749	+	unique
pA_chr5L-83	Xelaev18027110m.g	chr5L	72837970	72838011	+	unique
pA_chr5L-95	Xelaev18027659m.g	chr5L	112349607	112349648	-	unique
pA_chr7L-65	Xelaev18035836m.g	chr7L	97471450	97471491	+	unique
pA_chr1S-90	Xelaev18009057m.g	chr1S	28723773	28723814	+	unique
pA_chr2S-34	Xelaev18015178m.g	chr2S	68033666	68033707	+	unique
pA_chr3S-159	Xelaev18021044m.g	chr3S	76930246	76930287	+	unique
pA_chr3S-171	Xelaev18021631m.g	chr3S	119922022	119922063	-	unique
pA_chr4S-209	Xelaev18025519m.g	chr4S	86499520	86499561	-	unique
pA_chr8S-232	Xelaev18042561m.g	chr8S	83493390	83493431	+	unique
pA_chr9_10S-285	Xelaev18046381m.g	chr9_10S	17454155	17454196	+	unique
pA_chr2L-223	Xelaev18011535m.g	chr2L	17807914	17807955	+	unique
pA_chr2L-521	Xelaev18012508m.g	chr2L	82476428	82476469	-	unique
pA_chr4L-384	Xelaev18023065m.g	chr4L	79853932	79853973	-	unique
pA_chr5L-101	Xelaev18027920m.g	chr5L	128283472	128283513	+	unique
pA_chr1S-250	Xelaev18008860m.g	chr1S	11363533	11363574	-	unique
pA_chr4S-342	Xelaev18025437m.g	chr4S	80540973	80541014	+	unique
pA_chr4S-17	Xelaev18025757m.g	chr4S	98507308	98507349	-	unique
pA_chr1L-135	Xelaev18005621m.g	chr1L	59797848	59797889	-	unique
pA_chr1L-469	Xelaev18007851m.g	chr1L	163746859	163746900	-	unique
pA_chr5L-118	Xelaev18027146m.g	chr5L	75914702	75914743	-	unique
pA_chr2S-29	Xelaev18015210m.g	chr2S	70698711	70698752	-	unique
pA_chr3S-27	Xelaev18020364m.g	chr3S	30656717	30656758	-	unique
pA_chr8S-79	Xelaev18042800m.g	chr8S	94094708	94094749	-	unique
pA_chr1L-98	Xelaev18005651m.g	chr1L	61643543	61643584	+	unique
pA_chr7L-131	Xelaev18034647m.g	chr7L	23966505	23966546	+	unique
pA_chr8L-231	Xelaev18039643m.g	chr8L	70854240	70854281	+	unique
pA_chr1S-93	Xelaev18010576m.g	chr1S	130813311	130813352	-	unique
pA_chr3S-213	Xelaev18019717m.g	chr3S	1334828	1334869	-	unique
pA_chr3S-125	Xelaev18020767m.g	chr3S	58567810	58567851	+	unique
pA_chr4S-37	Xelaev18024644m.g	chr4S	22262274	22262315	+	unique
pA_chr5S-402	Xelaev18029939m.g	chr5S	109204021	109204062	-	unique
pA_chr7S-46	Xelaev18038019m.g	chr7S	87641170	87641211	+	unique
pA_chr8S-87	Xelaev18041631m.g	chr8S	32688182	32688223	+	unique
pA_chr9_10S-55	Xelaev18045850m.g	chr9_10S	258124	258165	-	unique
pA_chr9_10S-263	Xelaev18046237m.g	chr9_10S	13576586	13576627	-	unique
pA_chr9_10S-230	Xelaev18047504m.g	chr9_10S	81847226	81847267	+	unique
pA_chr1L-123	Xelaev18005895m.g	chr1L	78124998	78125039	-	unique
pA_chr2L-78	Xelaev18011645m.g	chr2L	29434792	29434833	-	unique
pA_chr2L-328	Xelaev18013473m.g	chr2L	143738757	143738798	-	unique
pA_chr5L-151	Xelaev18027647m.g	chr5L	111726948	111726989	-	unique
pA_chr5L-102	Xelaev18027923m.g	chr5L	128390543	128390584	+	unique
pA_chr6L-117	Xelaev18031847m.g	chr6L	104220876	104220917	-	unique
pA_chr7L-253	Xelaev18036239m.g	chr7L	114916493	114916534	+	unique
pA_chr2S-578	Xelaev18015658m.g	chr2S	103275968	103276009	-	unique
pA_chr7S-50	Xelaev18037838m.g	chr7S	80011309	80011350	+	unique
pA_chr8S-57	Xelaev18042218m.g	chr8S	65951325	65951366	-	unique
pA_chr8S-70	Xelaev18042391m.g	chr8S	77520838	77520879	-	unique
pA_chr9_10S-72	Xelaev18047749m.g	chr9_10S	96616703	96616744	+	unique
pA_chr1L-362	Xelaev18005396m.g	chr1L	41147044	41147085	-	unique
pA_chr1L-344	Xelaev18006293m.g	chr1L	98556937	98556978	+	unique
pA_chr1L-398	Xelaev18007954m.g	chr1L	169608088	169608129	-	unique
pA_chr2L-56	Xelaev18011888m.g	chr2L	45318082	45318123	-	unique
pA_chr6L-158	Xelaev18031119m.g	chr6L	49718724	49718765	-	unique
pA_chr8L-187	Xelaev18039282m.g	chr8L	55503110	55503151	+	unique
pA_chr8L-54	Xelaev18040966m.g	chr8L	119953137	119953178	-	unique
pA_chr1S-162	Xelaev18010951m.g	chr1S	160451888	160451929	-	unique
pA_chr2S-123	Xelaev18016056m.g	chr2S	129785132	129785173	-	unique
pA_chr4S-112	Xelaev18025383m.g	chr4S	77455717	77455758	-	unique
pA_chr8S-119	Xelaev18041467m.g	chr8S	27382541	27382582	-	unique
pA_chr9_10L-268	Xelaev18044855m.g	chr9_10L	74105049	74105090	+	unique
pA_chr1L-634	Xelaev18007351m.g	chr1L	142049114	142049155	+	unique
pA_chr3L-63	Xelaev18017606m.g	chr3L	56143314	56143355	-	unique
pA_chr8L-352	Xelaev18039386m.g	chr8L	58433370	58433411	-	unique
pA_chr8L-98	Xelaev18039630m.g	chr8L	69462977	69463018	+	unique
pA_chr1S-183	Xelaev18009638m.g	chr1S	77954163	77954204	-	unique
pA_chr1S-147	Xelaev18011096m.g	chr1S	173295570	173295611	+	unique
pA_chr2S-440	Xelaev18015642m.g	chr2S	102403386	102403427	-	unique
pA_chr2S-353	Xelaev18015904m.g	chr2S	121502773	121502814	-	unique
pA_chr5S-88	Xelaev18029096m.g	chr5S	47495170	47495211	+	unique
pA_chr5S-59	Xelaev18029586m.g	chr5S	83247973	83248014	+	unique
pA_chr6S-179	Xelaev18033523m.g	chr6S	75224782	75224823	-	unique
pA_chr9_10S-267	Xelaev18046580m.g	chr9_10S	27852824	27852865	-	unique
pA_chr1L-59	Xelaev18007606m.g	chr1L	152567196	152567237	-	unique
pA_chr3L-350	Xelaev18017642m.g	chr3L	59653830	59653871	+	unique
pA_chr5L-131	Xelaev18026520m.g	chr5L	31530012	31530053	+	unique
pA_chr6S-104	Xelaev18032784m.g	chr6S	6256689	6256730	-	unique
pA_chr1L-213	Xelaev18007424m.g	chr1L	144024491	144024532	-	unique
pA_chr2L-88	Xelaev18012102m.g	chr2L	58486066	58486107	+	unique
pA_chr2L-228	Xelaev18012970m.g	chr2L	110521854	110521895	-	unique
pA_chr5L-200	Xelaev18027270m.g	chr5L	86398477	86398518	+	unique
pA_chr8L-117	Xelaev18039202m.g	chr8L	52907208	52907249	+	unique
pA_chr2S-43	Xelaev18015042m.g	chr2S	62511273	62511314	+	unique
pA_chr3S-38	Xelaev18020883m.g	chr3S	63628216	63628257	+	unique
pA_chr8S-214	Xelaev18042622m.g	chr8S	85172378	85172419	+	unique
pA_chr3L-307	Xelaev18016959m.g	chr3L	16080337	16080378	+	unique
pA_chr4L-172	Xelaev18023748m.g	chr4L	116946129	116946170	-	unique
pA_chr5L-239	Xelaev18026509m.g	chr5L	30644366	30644407	-	unique
pA_chr3S-116	Xelaev18020304m.g	chr3S	27011785	27011826	+	unique
pA_chr5S-330	Xelaev18030217m.g	chr5S	132128580	132128621	-	unique
pA_chr7S-104	Xelaev18037020m.g	chr7S	23898041	23898082	-	unique
pA_chr7S-162	Xelaev18037783m.g	chr7S	77910403	77910444	+	unique
pA_chr8S-262	Xelaev18042563m.g	chr8S	83545490	83545531	+	unique
pA_chr2L-48	Xelaev18013891m.g	chr2L	170572083	170572124	+	unique
pA_chr4L-82	Xelaev18021713m.g	chr4L	1640849	1640890	-	unique
pA_chr4L-206	Xelaev18022133m.g	chr4L	22367664	22367705	+	unique
pA_chr5L-50	Xelaev18027234m.g	chr5L	81274114	81274155	+	unique
pA_chr1S-47	Xelaev18008972m.g	chr1S	21714438	21714479	+	unique
pA_chr5S-71	Xelaev18028742m.g	chr5S	20824020	20824061	+	unique
pA_chr5S-146	Xelaev18029131m.g	chr5S	49909580	49909621	-	unique
pA_chr6S-137	Xelaev18033401m.g	chr6S	63684360	63684401	-	unique
pA_chr8S-51	Xelaev18042465m.g	chr8S	79521341	79521382	+	unique
pA_chr1L-424	Xelaev18005332m.g	chr1L	35491651	35491692	-	unique
pA_chr1L-320	Xelaev18006931m.g	chr1L	132438387	132438428	-	unique
pA_chr3L-244	Xelaev18017893m.g	chr3L	77199530	77199571	+	unique
pA_chr3L-131	Xelaev18019212m.g	chr3L	136406282	136406323	+	unique
pA_chr4S-38	Xelaev18025105m.g	chr4S	58187351	58187392	+	unique
pA_chr8S-25	Xelaev18043018m.g	chr8S	98576517	98576558	-	unique
pA_chr9_10L-75	Xelaev18043750m.g	chr9_10L	23636917	23636958	+	unique
pA_chr2L-399	Xelaev18011260m.g	chr2L	1942900	1942941	-	unique
pA_chr3L-88	Xelaev18019101m.g	chr3L	133604720	133604761	+	unique
pA_chr5L-180	Xelaev18026078m.g	chr5L	1524811	1524852	-	unique
pA_chr6S-52	Xelaev18033771m.g	chr6S	95934230	95934271	+	unique
pA_chr6S-101	Xelaev18033779m.g	chr6S	96182793	96182834	-	unique
pA_chr7S-126	Xelaev18037002m.g	chr7S	22714664	22714705	-	unique
pA_chr8S-52	Xelaev18042494m.g	chr8S	80395465	80395506	+	unique
pA_chr9_10S-189	Xelaev18047567m.g	chr9_10S	86948264	86948305	+	unique
pA_chr1L-153	Xelaev18005005m.g	chr1L	10158791	10158832	+	unique
pA_chr3L-551	Xelaev18017940m.g	chr3L	79801996	79802037	-	unique
pA_chr4L-93	Xelaev18023668m.g	chr4L	113691403	113691444	-	unique
pA_chr6L-193	Xelaev18030821m.g	chr6L	26042837	26042878	-	unique
pA_chr6L-248	Xelaev18032519m.g	chr6L	153728450	153728491	+	unique
pA_chr7L-115	Xelaev18034605m.g	chr7L	20811639	20811680	-	unique
pA_chr7L-51	Xelaev18035949m.g	chr7L	101149244	101149285	-	unique
pA_chr7L-211	Xelaev18036564m.g	chr7L	125943468	125943509	-	unique
pA_chr8L-264	Xelaev18038372m.g	chr8L	6787615	6787656	-	unique
pA_chr8L-219	Xelaev18040399m.g	chr8L	104768945	104768986	-	unique
pA_chr1S-154	Xelaev18010555m.g	chr1S	128448550	128448591	+	unique
pA_chr3S-219	Xelaev18020358m.g	chr3S	30469151	30469192	-	unique
pA_chr4S-105	Xelaev18025211m.g	chr4S	65207208	65207249	-	unique
pA_chr6S-339	Xelaev18032998m.g	chr6S	26853683	26853724	-	unique
pA_chr6S-98	Xelaev18033329m.g	chr6S	55757542	55757583	-	unique
pA_chr8S-55	Xelaev18041207m.g	chr8S	12691260	12691301	+	unique
pA_chr9_10L-147	Xelaev18043845m.g	chr9_10L	29343649	29343690	-	unique
pA_chr9_10L-179	Xelaev18044803m.g	chr9_10L	71591830	71591871	-	unique
pA_chr1L-206	Xelaev18005478m.g	chr1L	48170701	48170742	-	unique
pA_chr1L-103	Xelaev18006459m.g	chr1L	103171207	103171248	-	unique
pA_chr1L-116	Xelaev18007828m.g	chr1L	163127845	163127886	-	unique
pA_chr2L-179	Xelaev18013051m.g	chr2L	114820487	114820528	-	unique
pA_chr2L-534	Xelaev18013702m.g	chr2L	154828865	154828906	-	unique
pA_chr3L-252	Xelaev18016752m.g	chr3L	5276529	5276570	+	unique
pA_chr4L-543	Xelaev18022661m.g	chr4L	52750891	52750932	+	unique
pA_chr7L-55	Xelaev18035207m.g	chr7L	59803530	59803571	+	unique
pA_chr2S-206	Xelaev18015436m.g	chr2S	87592345	87592386	-	unique
pA_chr9_10L-294	Xelaev18045148m.g	chr9_10L	89320397	89320438	-	unique
pA_chr9_10S-126	Xelaev18046375m.g	chr9_10S	17221285	17221326	+	unique
pA_chr1L-300	Xelaev18007865m.g	chr1L	164508200	164508241	+	unique
pA_chr1L-191	Xelaev18008520m.g	chr1L	215559503	215559544	-	unique
pA_chr3L-231	Xelaev18018556m.g	chr3L	115098873	115098914	+	unique
pA_chr4L-395	Xelaev18023913m.g	chr4L	124233446	124233487	+	unique
pA_chr6L-68	Xelaev18031891m.g	chr6L	108029976	108030017	-	unique
pA_chr1S-143	Xelaev18010440m.g	chr1S	123806702	123806743	-	unique
pA_chr1S-117	Xelaev18010767m.g	chr1S	144299154	144299195	+	unique
pA_chr3S-82	Xelaev18019807m.g	chr3S	3857687	3857728	+	unique
pA_chr4S-252	Xelaev18025682m.g	chr4S	94777585	94777626	+	unique
pA_chr5S-185	Xelaev18029945m.g	chr5S	109575097	109575138	+	unique
pA_chr7S-99	Xelaev18036923m.g	chr7S	18456991	18457032	+	unique
pA_chr9_10L-252	Xelaev18044169m.g	chr9_10L	40502615	40502656	-	unique
pA_chr1L-194	Xelaev18006476m.g	chr1L	104070437	104070478	+	unique
pA_chr1L-74	Xelaev18006532m.g	chr1L	106689393	106689434	-	unique
pA_chr3L-161	Xelaev18017559m.g	chr3L	52332044	52332085	+	unique
pA_chr4L-265	Xelaev18021858m.g	chr4L	8466104	8466145	-	unique
pA_chr6L-111	Xelaev18031364m.g	chr6L	68215506	68215547	+	unique
pA_chr1S-39	Xelaev18009761m.g	chr1S	84754073	84754114	-	unique
pA_chr1S-94	Xelaev18010652m.g	chr1S	135264602	135264643	-	unique
pA_chr2S-85	Xelaev18015126m.g	chr2S	65256570	65256611	+	unique
pA_chr3S-210	Xelaev18021187m.g	chr3S	87634495	87634536	-	unique
pA_chr6S-30	Xelaev18033984m.g	chr6S	117071002	117071043	+	unique
pA_chr9_10L-122	Xelaev18043209m.g	chr9_10L	3119868	3119909	+	unique
pA_chr1L-90	Xelaev18004894m.g	chr1L	7125612	7125653	+	unique
pA_chr1L-258	Xelaev18005713m.g	chr1L	67033613	67033654	+	unique
pA_chr4L-199	Xelaev18023677m.g	chr4L	114524076	114524117	+	unique
pA_chr8L-94	Xelaev18038891m.g	chr8L	38410017	38410058	-	unique
pA_chr8L-506	Xelaev18039197m.g	chr8L	52719912	52719953	-	unique
pA_chr3S-59	Xelaev18021342m.g	chr3S	97426945	97426986	+	unique
pA_chr3S-228	Xelaev18021470m.g	chr3S	107734109	107734150	+	unique
pA_chr5S-344	Xelaev18029612m.g	chr5S	85332044	85332085	+	unique
pA_chr6S-141	Xelaev18033963m.g	chr6S	114623068	114623109	-	unique
pA_chr7S-202	Xelaev18036986m.g	chr7S	22357867	22357908	+	unique
pA_chr7S-105	Xelaev18037174m.g	chr7S	34775948	34775989	-	unique
pA_chr1L-81	Xelaev18006092m.g	chr1L	89221308	89221349	+	unique
pA_chr2L-149	Xelaev18011525m.g	chr2L	16059765	16059806	+	unique
pA_chr3L-298	Xelaev18018487m.g	chr3L	109612075	109612116	-	unique
pA_chr3L-121	Xelaev18019108m.g	chr3L	133783430	133783471	+	unique
pA_chr6L-210	Xelaev18031895m.g	chr6L	108232839	108232880	+	unique
pA_chr1S-322	Xelaev18008863m.g	chr1S	11621322	11621363	+	unique
pA_chr2S-242	Xelaev18016133m.g	chr2S	132990413	132990454	-	unique
pA_chr3S-431	Xelaev18020542m.g	chr3S	45024677	45024718	+	unique
pA_chr3S-166	Xelaev18021113m.g	chr3S	82067879	82067920	-	unique
pA_chr9_10L-644	Xelaev18045396m.g	chr9_10L	104711017	104711058	+	unique
pA_chr1L-755	Xelaev18008057m.g	chr1L	179366283	179366324	+	unique
pA_chr4L-221	Xelaev18023511m.g	chr4L	106480321	106480362	+	unique
pA_chr5L-369	Xelaev18026290m.g	chr5L	17196269	17196310	-	unique
pA_chr8L-210	Xelaev18038681m.g	chr8L	22662493	22662534	+	unique
pA_chr1S-444	Xelaev18009768m.g	chr1S	85228916	85228957	-	unique
pA_chr2S-112	Xelaev18015015m.g	chr2S	61406655	61406696	+	unique
pA_chr2S-157	Xelaev18015072m.g	chr2S	63389679	63389720	+	unique
pA_chr2S-192	Xelaev18015328m.g	chr2S	77995183	77995224	-	unique
pA_chr2S-581	Xelaev18016180m.g	chr2S	137114007	137114048	+	unique
pA_chr5S-105	Xelaev18029690m.g	chr5S	89827700	89827741	-	unique
pA_chr6S-53	Xelaev18032687m.g	chr6S	1902259	1902300	+	unique
pA_chr7S-120	Xelaev18037510m.g	chr7S	62000257	62000298	-	unique
pA_chr2L-448	Xelaev18011446m.g	chr2L	11752136	11752177	-	unique
pA_chr3L-115	Xelaev18017952m.g	chr3L	80196692	80196733	-	unique
pA_chr2S-574	Xelaev18015540m.g	chr2S	94645483	94645524	-	unique
pA_chr3S-97	Xelaev18021204m.g	chr3S	88638845	88638886	+	unique
pA_chr6S-140	Xelaev18033957m.g	chr6S	114076659	114076700	-	unique
pA_chr9_10L-333	Xelaev18044061m.g	chr9_10L	36806469	36806510	+	unique
pA_chr9_10L-241	Xelaev18045328m.g	chr9_10L	100690400	100690441	-	unique
pA_chr9_10L-325	Xelaev18045426m.g	chr9_10L	105447724	105447765	+	unique
pA_chr9_10S-111	Xelaev18047547m.g	chr9_10S	84663749	84663790	-	unique
pA_chr1L-298	Xelaev18007483m.g	chr1L	146500462	146500503	-	unique
pA_chr2L-140	Xelaev18012803m.g	chr2L	99046397	99046438	+	unique
pA_chr4L-269	Xelaev18022339m.g	chr4L	29620776	29620817	+	unique
pA_chr5L-94	Xelaev18027456m.g	chr5L	98788993	98789034	-	unique
pA_chr8L-92	Xelaev18038221m.g	chr8L	1993904	1993945	-	unique
pA_chr8L-240	Xelaev18038467m.g	chr8L	12157644	12157685	-	unique
pA_chr1S-85	Xelaev18009664m.g	chr1S	78846526	78846567	-	unique
pA_chr2S-368	Xelaev18014449m.g	chr2S	28278127	28278168	+	unique
pA_chr2S-107	Xelaev18016237m.g	chr2S	141136850	141136891	+	unique
pA_chr4S-32	Xelaev18024979m.g	chr4S	48954603	48954644	+	unique
pA_chr9_10L-445	Xelaev18044054m.g	chr9_10L	36634771	36634812	+	unique
pA_chr3L-312	Xelaev18017919m.g	chr3L	78031404	78031445	+	unique
pA_chr3L-458	Xelaev18018677m.g	chr3L	120488942	120488983	+	unique
pA_chr4L-288	Xelaev18021886m.g	chr4L	9433430	9433471	-	unique
pA_chr4L-150	Xelaev18022104m.g	chr4L	21545711	21545752	-	unique
pA_chr5L-159	Xelaev18027025m.g	chr5L	67187749	67187790	-	unique
pA_chr5L-201	Xelaev18027295m.g	chr5L	88020131	88020172	-	unique
pA_chr5L-113	Xelaev18028041m.g	chr5L	138101194	138101235	+	unique
pA_chr6L-92	Xelaev18031110m.g	chr6L	49311240	49311281	-	unique
pA_chr7L-68	Xelaev18035637m.g	chr7L	86404391	86404432	-	unique
pA_chr8L-21	Xelaev18038663m.g	chr8L	22054617	22054658	-	unique
pA_chr8L-275	Xelaev18039639m.g	chr8L	70791391	70791432	-	unique
pA_chr4S-55	Xelaev18025208m.g	chr4S	65068736	65068777	-	unique
pA_chr7S-26	Xelaev18037480m.g	chr7S	59093441	59093482	-	unique
pA_chr7S-64	Xelaev18037729m.g	chr7S	74994674	74994715	-	unique
pA_chr8S-120	Xelaev18041589m.g	chr8S	31352621	31352662	-	unique
pA_chr9_10L-148	Xelaev18044063m.g	chr9_10L	36855230	36855271	+	unique
pA_chr9_10S-116	Xelaev18046232m.g	chr9_10S	13415869	13415910	-	unique
pA_chr1L-41	Xelaev18005634m.g	chr1L	60613501	60613542	+	unique
pA_chr4L-49	Xelaev18022636m.g	chr4L	50063056	50063097	-	unique
pA_chr1S-177	Xelaev18008839m.g	chr1S	9514150	9514191	-	unique
pA_chr2S-274	Xelaev18015564m.g	chr2S	96531958	96531999	-	unique
pA_chr7S-262	Xelaev18037932m.g	chr7S	84926191	84926232	+	unique
pA_chr8S-126	Xelaev18042533m.g	chr8S	82281812	82281853	+	unique
pA_chr9_10L-85	Xelaev18045048m.g	chr9_10L	84617709	84617750	-	unique
pA_chr1L-257	Xelaev18005507m.g	chr1L	50558291	50558332	-	unique
pA_chr3L-338	Xelaev18018316m.g	chr3L	98424364	98424405	+	unique
pA_chr3L-248	Xelaev18018778m.g	chr3L	123265514	123265555	+	unique
pA_chr4L-494	Xelaev18024126m.g	chr4L	139674787	139674828	-	unique
pA_chr5L-211	Xelaev18026426m.g	chr5L	23816965	23817006	-	unique
pA_chr5L-304	Xelaev18026503m.g	chr5L	30475083	30475124	+	unique
pA_chr5L-133	Xelaev18027144m.g	chr5L	75871180	75871221	-	unique
pA_chr5L-76	Xelaev18027263m.g	chr5L	84832797	84832838	+	unique
pA_chr6L-234	Xelaev18032071m.g	chr6L	119565595	119565636	-	unique
pA_chr6L-59	Xelaev18032202m.g	chr6L	128821944	128821985	-	unique
pA_chr3S-67	Xelaev18020029m.g	chr3S	14663526	14663567	+	unique
pA_chr9_10L-490	Xelaev18044931m.g	chr9_10L	78886327	78886368	+	unique
pA_chr9_10L-96	Xelaev18045330m.g	chr9_10L	100785217	100785258	-	unique
pA_chr9_10L-97	Xelaev18045420m.g	chr9_10L	105257028	105257069	-	unique
pA_chr1L-269	Xelaev18008366m.g	chr1L	202638593	202638634	+	unique
pA_chr1L-701	Xelaev18008463m.g	chr1L	210553027	210553068	-	unique
pA_chr2L-378	Xelaev18014100m.g	chr2L	180768933	180768974	-	unique
pA_chr5L-46	Xelaev18026346m.g	chr5L	19986000	19986041	-	unique
pA_chr7L-29	Xelaev18035488m.g	chr7L	77444429	77444470	-	unique
pA_chr1S-56	Xelaev18009334m.g	chr1S	55552724	55552765	+	unique
pA_chr5S-177	Xelaev18030118m.g	chr5S	124142803	124142844	+	unique
pA_chr6S-102	Xelaev18033913m.g	chr6S	108465176	108465217	+	unique
pA_chr9_10L-228	Xelaev18043054m.g	chr9_10L	92194	92235	-	unique
pA_chr1L-147	Xelaev18006627m.g	chr1L	110998001	110998042	+	unique
pA_chr2L-177	Xelaev18012046m.g	chr2L	56586086	56586127	-	unique
pA_chr2L-113	Xelaev18013687m.g	chr2L	153466220	153466261	-	unique
pA_chr4L-233	Xelaev18023646m.g	chr4L	112961316	112961357	-	unique
pA_chr5L-39	Xelaev18027801m.g	chr5L	123569214	123569255	-	unique
pA_chr1S-379	Xelaev18009935m.g	chr1S	90690256	90690297	+	unique
pA_chr1S-145	Xelaev18010837m.g	chr1S	152229584	152229625	-	unique
pA_chr2S-121	Xelaev18015094m.g	chr2S	64077615	64077656	-	unique
pA_chr4S-381	Xelaev18025550m.g	chr4S	88005067	88005108	-	unique
pA_chr4S-212	Xelaev18025691m.g	chr4S	95093461	95093502	+	unique
pA_chr5S-43	Xelaev18029270m.g	chr5S	59717065	59717106	-	unique
pA_chr7S-95	Xelaev18037855m.g	chr7S	80564203	80564244	+	unique
pA_chr7S-66	Xelaev18037898m.g	chr7S	83458110	83458151	+	unique
pA_chr8S-190	Xelaev18041284m.g	chr8S	19528834	19528875	-	unique
pA_chr8S-133	Xelaev18042475m.g	chr8S	79760546	79760587	-	unique
pA_chr9_10L-203	Xelaev18045634m.g	chr9_10L	113896677	113896718	+	unique
pA_chr1L-51	Xelaev18007555m.g	chr1L	151418051	151418092	+	unique
pA_chr5L-142	Xelaev18027834m.g	chr5L	124644852	124644893	-	unique
pA_chr7L-183	Xelaev18035440m.g	chr7L	74450649	74450690	-	unique
pA_chr2S-190	Xelaev18015193m.g	chr2S	69308969	69309010	+	unique
pA_chr4S-242	Xelaev18025031m.g	chr4S	51557185	51557226	+	unique
pA_chr5S-56	Xelaev18028762m.g	chr5S	22053491	22053532	+	unique
pA_chr6S-76	Xelaev18033050m.g	chr6S	32049270	32049311	-	unique
pA_chr1L-339	Xelaev18006109m.g	chr1L	89990259	89990300	+	unique
pA_chr1L-570	Xelaev18006454m.g	chr1L	103067432	103067473	+	unique
pA_chr2L-242	Xelaev18012531m.g	chr2L	84134452	84134493	-	unique
pA_chr3L-70	Xelaev18017396m.g	chr3L	42742551	42742592	-	unique
pA_chr6L-224	Xelaev18031233m.g	chr6L	59086683	59086724	-	unique
pA_chr8L-405	Xelaev18039229m.g	chr8L	53574941	53574982	-	unique
pA_chr8L-260	Xelaev18040051m.g	chr8L	92962181	92962222	+	unique
pA_chr3S-189	Xelaev18019943m.g	chr3S	10153206	10153247	-	unique
pA_chr4S-113	Xelaev18025425m.g	chr4S	79930077	79930118	-	unique
pA_chr8S-220	Xelaev18041316m.g	chr8S	20997309	20997350	+	unique
pA_chr8S-98	Xelaev18041419m.g	chr8S	26602045	26602086	+	unique
pA_chr8S-245	Xelaev18042642m.g	chr8S	86149887	86149928	-	unique
pA_chr9_10L-290	Xelaev18044348m.g	chr9_10L	45844757	45844798	+	unique
pA_chr1L-93	Xelaev18006616m.g	chr1L	110554340	110554381	-	unique
pA_chr3L-409	Xelaev18017469m.g	chr3L	48236908	48236949	+	unique
pA_chr3L-523	Xelaev18018432m.g	chr3L	107404607	107404648	-	unique
pA_chr3L-297	Xelaev18018474m.g	chr3L	109327066	109327107	-	unique
pA_chr3L-202	Xelaev18019337m.g	chr3L	138837670	138837711	+	unique
pA_chr6L-52	Xelaev18031899m.g	chr6L	108480550	108480591	-	unique
pA_chr8L-79	Xelaev18038478m.g	chr8L	13008848	13008889	+	unique
pA_chr2S-66	Xelaev18014150m.g	chr2S	3998066	3998107	-	unique
pA_chr2S-84	Xelaev18015123m.g	chr2S	65179665	65179706	+	unique
pA_chr3S-118	Xelaev18021071m.g	chr3S	78621011	78621052	-	unique
pA_chr3S-230	Xelaev18021624m.g	chr3S	119474500	119474541	-	unique
pA_chr4S-104	Xelaev18025163m.g	chr4S	62729628	62729669	+	unique
pA_chr4S-138	Xelaev18025929m.g	chr4S	109700512	109700553	-	unique
pA_chr6S-144	Xelaev18032884m.g	chr6S	17317907	17317948	-	unique
pA_chr9_10L-554	Xelaev18043373m.g	chr9_10L	7560445	7560486	+	unique
pA_chr9_10L-80	Xelaev18043463m.g	chr9_10L	11499622	11499663	-	unique
pA_chr9_10S-109	Xelaev18047097m.g	chr9_10S	53593563	53593604	-	unique
pA_chr2L-169	Xelaev18011892m.g	chr2L	45393995	45394036	+	unique
pA_chr3L-282	Xelaev18018952m.g	chr3L	127842336	127842377	-	unique
[truncated: 15,994 more rows]

## Sheet: HeLa
pA_site	gene_id	chr	chr_start	chr_end	chr_strand	pA_site_type
pA_chr12-11	ENSG00000123416.15	chr12	49127788	49127829	-	unique
pA_chr17-13	ENSG00000179029.14	chr17	8173476	8173517	-	unique
pA_chr10-2	ENSG00000026025.14	chr10	17237538	17237579	+	unique
pA_chr5-26	ENSG00000186468.12	chr5	82276069	82276110	-	unique
pA_chr12-2	ENSG00000111640.14	chr12	6538314	6538355	+	unique
pA_chr2-2	ENSG00000034510.5	chr2	84906619	84906660	+	unique
pA_chr5-4	ENSG00000178172.6	chr5	148215094	148215135	+	unique
pA_chr11-2	ENSG00000166441.12	chr11	8685795	8685836	+	unique
pA_chr19-4	ENSG00000087086.14	chr19	48966830	48966871	+	unique
pA_chr17-33	ENSG00000184009.9	chr17	81509970	81510011	-	unique
pA_chrX-2	ENSG00000198918.7	chrX	119786506	119786547	-	unique
pA_chr2-3	ENSG00000071082.10	chr2	101006368	101006409	+	unique
pA_chr15-4	ENSG00000137818.11	chr15	69455514	69455555	+	unique
pA_chr10-1	ENSG00000138326.18	chr10	78040659	78040700	+	unique
pA_chr11-3	ENSG00000149273.14	chr11	75405639	75405680	+	unique
pA_chr3-1	ENSG00000144713.12	chr3	12836040	12836081	-	unique
pA_chr9-2	ENSG00000136942.14	chr9	124857886	124857927	-	unique
pA_chr17-5	ENSG00000125691.12	chr17	38850079	38850120	-	unique
pA_chr9-1	ENSG00000136810.12	chr9	110244025	110244066	-	unique
pA_chr1-4	ENSG00000197956.9	chr1	153534603	153534644	-	unique
pA_chr9-4	ENSG00000137154.12	chr9	19376253	19376294	-	unique
pA_chr17-3	ENSG00000131469.12	chr17	43002904	43002945	+	unique
pA_chr14-4	ENSG00000213741.8	chr14	49583586	49583627	-	unique
pA_chr8-2	ENSG00000161016.16	chr8	144789770	144789811	-	unique
pA_chr8-6	ENSG00000008988.9	chr8	56073052	56073093	-	unique
pA_chr1-1	ENSG00000074800.13	chr1	8861011	8861052	-	unique
pA_chr12-32	ENSG00000089157.15	chr12	120196703	120196744	-	unique
pA_chr12-17	ENSG00000135486.17	chr12	54284831	54284872	+	unique
pA_chr17-4	ENSG00000172809.12	chr17	74209823	74209864	+	unique
pA_chr19-3	ENSG00000105193.8	chr19	39433220	39433261	-	unique
pA_chr1-2	ENSG00000142676.12	chr1	23696364	23696405	+	unique
pA_chr2-7	ENSG00000197756.9	chr2	216501414	216501455	+	unique
pA_chr3-63	ENSG00000174748.18	chr3	23919513	23919554	+	unique
pA_chr8-4	ENSG00000156482.10	chr8	98041721	98041762	-	unique
pA_chr20-2	ENSG00000171858.17	chr20	62388462	62388503	+	unique
pA_chr1-9	ENSG00000122406.12	chr1	92841867	92841908	+	unique
pA_chr3-2	ENSG00000182899.14	chr3	197955788	197955829	+	unique
pA_chr17-27	ENSG00000108298.9	chr17	39204679	39204720	+	unique
pA_chrX-1	ENSG00000198034.10	chrX	72272614	72272655	-	unique
pA_chr12-9	ENSG00000167553.14	chr12	49273288	49273329	+	unique
pA_chr11-9	ENSG00000149806.10	chr11	65120634	65120675	-	unique
pA_chr11-15	ENSG00000110321.15	chr11	10797053	10797094	-	unique
pA_chr19-12	ENSG00000083845.8	chr19	58394757	58394798	+	unique
pA_chr4-1	ENSG00000109475.16	chr4	108625202	108625243	+	unique
pA_chr17-2	ENSG00000170315.13	chr17	16382703	16382744	+	unique
pA_chr17-12	ENSG00000108518.7	chr17	4945661	4945702	-	unique
pA_chr7-6	ENSG00000122566.20	chr7	26191850	26191891	-	unique
pA_chr4-3	ENSG00000164032.11	chr4	99948071	99948112	-	unique
pA_chr2-5	ENSG00000143933.16	chr2	47160168	47160209	-	unique
pA_chr20-1	ENSG00000101182.14	chr20	62136733	62136774	-	unique
pA_chr5-1	ENSG00000204628.11	chr5	181236936	181236977	-	unique
pA_chr6-25	ENSG00000124614.13	chr6	34417455	34417496	-	unique
pA_chr13-1	ENSG00000189403.14	chr13	30460888	30460929	-	unique
pA_chr16-5	ENSG00000149925.17	chr16	30070370	30070411	+	unique
pA_chr19-8	ENSG00000142534.6	chr19	49499651	49499692	+	unique
pA_chr19-19	ENSG00000170889.13	chr19	54207601	54207642	+	unique
pA_chr19-2	ENSG00000108107.13	chr19	55388334	55388375	+	unique
pA_chr6-3	ENSG00000096384.19	chr6	44253831	44253872	+	unique
pA_chr16-3	ENSG00000140988.15	chr16	1962975	1963016	-	unique
pA_chr12-1	ENSG00000092841.18	chr12	56161527	56161568	+	unique
pA_chr2-1	ENSG00000115758.12	chr2	10440384	10440425	-	unique
pA_chr2-19	ENSG00000114942.13	chr2	206162883	206162924	+	unique
pA_chr16-4	ENSG00000169715.14	chr16	56627059	56627100	+	unique
pA_chr12-29	ENSG00000229117.8	chr12	56117793	56117834	+	unique
pA_chr1-49	ENSG00000173660.11	chr1	46316724	46316765	+	unique
pA_chr8-33	ENSG00000070756.14	chr8	100702914	100702955	-	unique
pA_chr17-18	ENSG00000108561.8	chr17	5432785	5432826	-	unique
pA_chr2-114	ENSG00000144381.16	chr2	197486594	197486635	-	unique
pA_chr1-8	ENSG00000117450.13	chr1	45511046	45511087	-	unique
pA_chr15-12	ENSG00000182774.10	chr15	82536746	82536787	-	unique
pA_chr7-2	ENSG00000106211.8	chr7	76304247	76304288	+	unique
pA_chr1-56	ENSG00000197747.8	chr1	151982920	151982961	-	unique
pA_chr9-29	ENSG00000197958.12	chr9	127447683	127447724	-	unique
pA_chr6-7	ENSG00000137309.19	chr6	34246179	34246220	+	unique
pA_chr5-14	ENSG00000127184.11	chr5	86620711	86620752	+	unique
pA_chr5-16	ENSG00000164405.10	chr5	132867656	132867697	+	unique
pA_chr12-34	ENSG00000111716.12	chr12	21635345	21635386	-	unique
pA_chr12-7	ENSG00000075415.12	chr12	98601665	98601706	+	unique
pA_chr7-19	ENSG00000075624.13	chr7	5527146	5527187	-	unique
pA_chr19-11	ENSG00000063177.12	chr19	48615340	48615381	-	unique
pA_chr5-15	ENSG00000197451.11	chr5	178211121	178211162	+	unique
pA_chr19-9	ENSG00000104904.12	chr19	2273283	2273324	+	unique
pA_chr16-2	ENSG00000167526.13	chr16	89563029	89563070	+	unique
pA_chr12-56	ENSG00000139343.10	chr12	95866083	95866124	+	unique
pA_chr6-13	ENSG00000135346.8	chr6	87085508	87085549	-	unique
pA_chr5-78	ENSG00000213585.10	chr5	133971928	133971969	-	unique
pA_chr17-7	ENSG00000141753.6	chr17	40457671	40457712	+	unique
pA_chr21-1	ENSG00000205581.10	chr21	39342309	39342350	-	unique
pA_chr1-3	ENSG00000196154.11	chr1	153543624	153543665	-	unique
pA_chr11-1	ENSG00000172757.12	chr11	65854809	65854850	-	unique
pA_chr6-2	ENSG00000112245.9	chr6	63581406	63581447	+	unique
pA_chr1-32	ENSG00000143321.18	chr1	156742108	156742149	-	unique
pA_chr5-45	ENSG00000145741.15	chr5	73505447	73505488	+	unique
pA_chr17-6	ENSG00000239672.7	chr17	51162001	51162042	+	unique
pA_chr19-28	ENSG00000105202.7	chr19	39834461	39834502	-	unique
pA_chr12-99	ENSG00000023734.10	chr12	15903426	15903467	+	unique
pA_chr7-7	ENSG00000132432.13	chr7	54752257	54752298	-	unique
pA_chr5-30	ENSG00000161011.19	chr5	179837216	179837257	+	unique
pA_chr11-46	ENSG00000173113.6	chr11	64316682	64316723	-	unique
pA_chr1-12	ENSG00000168653.10	chr1	39034575	39034616	+	unique
pA_chr16-13	ENSG00000103187.7	chr16	84565588	84565629	-	unique
pA_chr14-8	ENSG00000087302.8	chr14	52004654	52004695	+	unique
pA_chr2-58	ENSG00000154518.9	chr2	175178146	175178187	-	unique
pA_chr6-9	ENSG00000120438.11	chr6	159778947	159778988	-	unique
pA_chr19-6	ENSG00000167658.15	chr19	3976056	3976097	-	unique
pA_chr19-27	ENSG00000105185.11	chr19	32587380	32587421	+	unique
pA_chr9-28	ENSG00000147889.17	chr9	21967993	21968034	-	unique
pA_chr9-13	ENSG00000135046.13	chr9	73170349	73170390	+	unique
pA_chr9-5	ENSG00000148303.16	chr9	133351383	133351424	+	unique
pA_chr19-1	ENSG00000125743.10	chr19	45687464	45687505	-	unique
pA_chr4-8	ENSG00000163453.11	chr4	57031089	57031130	-	unique
pA_chr1-15	ENSG00000158710.14	chr1	159918111	159918152	-	unique
pA_chr5-8	ENSG00000169567.11	chr5	131159286	131159327	-	unique
pA_chr8-65	ENSG00000104529.17	chr8	143579712	143579753	-	unique
pA_chr3-3	ENSG00000163931.15	chr3	53225648	53225689	-	unique
pA_chr12-8	ENSG00000060138.12	chr12	10699076	10699117	-	unique
pA_chrX-4	ENSG00000102144.13	chrX	78126224	78126265	+	unique
pA_chr5-3	ENSG00000150753.11	chr5	10264966	10265007	+	unique
pA_chr14-6	ENSG00000119705.9	chr14	77717539	77717580	+	unique
pA_chr12-63	ENSG00000110955.8	chr12	56638182	56638223	-	unique
pA_chrX-14	ENSG00000147140.15	chrX	71301114	71301155	+	unique
pA_chr4-5	ENSG00000164111.14	chr4	121667998	121668039	-	unique
pA_chr8-3	ENSG00000160886.13	chr8	142703409	142703450	+	unique
pA_chr11-13	ENSG00000177600.8	chr11	812823	812864	+	unique
pA_chr3-20	ENSG00000169908.11	chr3	149369024	149369065	-	unique
pA_chr12-14	ENSG00000135480.14	chr12	52248871	52248912	+	unique
pA_chr12-16	ENSG00000088986.10	chr12	120498454	120498495	+	unique
pA_chr14-9	ENSG00000198668.10	chr14	90405560	90405601	+	unique
pA_chr1-22	ENSG00000163191.5	chr1	152032511	152032552	-	unique
pA_chr17-41	ENSG00000161960.14	chr17	7578952	7578993	+	unique
pA_chr1-52	ENSG00000116288.12	chr1	7985236	7985277	+	unique
pA_chr11-18	ENSG00000151366.12	chr11	78069854	78069895	-	unique
pA_chr13-4	ENSG00000132963.7	chr13	28678159	28678200	+	unique
pA_chrX-6	ENSG00000102317.17	chrX	48578237	48578278	+	unique
pA_chr11-8	ENSG00000109919.9	chr11	47618722	47618763	-	unique
pA_chr1-21	ENSG00000159377.10	chr1	151401892	151401933	+	unique
pA_chr11-17	ENSG00000069482.6	chr11	68691139	68691180	+	unique
pA_chr19-349	ENSG00000142541.16	chr19	49492260	49492301	+	unique
pA_chr17-46	ENSG00000189159.15	chr17	75135990	75136031	-	unique
pA_chr5-17	ENSG00000049656.13	chr5	1317863	1317904	-	unique
pA_chr1-58	ENSG00000196352.14	chr1	207360469	207360510	+	unique
pA_chr16-6	ENSG00000103257.8	chr16	87830030	87830071	-	unique
pA_chr11-16	ENSG00000084207.15	chr11	67586607	67586648	+	unique
pA_chr14-35	ENSG00000100804.18	chr14	23025854	23025895	-	unique
pA_chr12-85	ENSG00000150991.14	chr12	124911646	124911687	-	unique
pA_chr1-28	ENSG00000117395.11	chr1	43164301	43164342	-	unique
pA_chr4-10	ENSG00000138668.18	chr4	82353825	82353866	-	unique
pA_chr2-14	ENSG00000121966.6	chr2	136114349	136114390	-	unique
pA_chr16-106	ENSG00000131143.8	chr16	85806944	85806985	+	unique
pA_chr11-5	ENSG00000149257.13	chr11	75572739	75572780	+	unique
pA_chr1-74	ENSG00000163468.14	chr1	156308970	156309011	-	unique
pA_chr7-47	ENSG00000106588.10	chr7	42917413	42917454	-	unique
pA_chr1-50	ENSG00000174021.10	chr1	84498322	84498363	-	unique
pA_chr19-117	ENSG00000221983.7	chr19	18575188	18575229	+	unique
pA_chr5-24	ENSG00000150753.11	chr5	10264876	10264917	+	unique
pA_chr7-24	ENSG00000106028.10	chr7	141750419	141750460	+	unique
pA_chr8-12	ENSG00000147684.7	chr8	124549934	124549975	+	unique
pA_chr4-14	ENSG00000163682.15	chr4	39454125	39454166	-	unique
pA_chr15-13	ENSG00000166710.17	chr15	44718109	44718150	+	unique
pA_chr8-5	ENSG00000136997.15	chr8	127741381	127741422	+	unique
pA_chr9-7	ENSG00000136930.12	chr9	124353478	124353519	-	unique
pA_chr5-6	ENSG00000145494.11	chr5	1815999	1816040	+	unique
pA_chr5-32	ENSG00000181163.13	chr5	171406688	171406729	+	unique
pA_chr9-26	ENSG00000123975.4	chr9	89316660	89316701	+	unique
pA_chr5-5	ENSG00000176788.8	chr5	17276790	17276831	+	unique
pA_chr1-14	ENSG00000196754.10	chr1	153561340	153561381	-	unique
pA_chr12-21	ENSG00000111639.7	chr12	6492147	6492188	-	unique
pA_chr1-257	ENSG00000143761.14	chr1	228099163	228099204	+	unique
pA_chr1-23	ENSG00000182004.12	chr1	203870045	203870086	+	unique
pA_chr9-9	ENSG00000198467.13	chr9	35682007	35682048	-	unique
pA_chr1-42	ENSG00000090621.13	chr1	39560819	39560860	-	unique
pA_chr11-29	ENSG00000176340.3	chr11	63976500	63976541	+	unique
pA_chr22-13	ENSG00000100097.11	chr22	37679757	37679798	+	unique
pA_chr3-25	ENSG00000065518.7	chr3	120602282	120602323	+	unique
pA_chr12-4	ENSG00000135404.11	chr12	55725461	55725502	-	unique
pA_chr14-5	ENSG00000100632.10	chr14	69380135	69380176	-	unique
pA_chr17-37	ENSG00000136450.12	chr17	58003501	58003542	-	unique
pA_chr7-67	ENSG00000189043.9	chr7	10933460	10933501	-	unique
pA_chr12-15	ENSG00000166226.12	chr12	69601527	69601568	+	unique
pA_chr12-18	ENSG00000198431.15	chr12	104350246	104350287	+	unique
pA_chr1-61	ENSG00000117450.13	chr1	45511237	45511278	-	unique
pA_chr17-34	ENSG00000186395.7	chr17	40818127	40818168	-	unique
pA_chr9-12	ENSG00000136938.8	chr9	98015767	98015808	+	unique
pA_chr17-50	ENSG00000129235.10	chr17	6643067	6643108	+	unique
pA_chrX-22	ENSG00000184216.12	chrX	154010507	154010548	-	unique
pA_chr16-19	ENSG00000134419.15	chr16	18782950	18782991	-	unique
pA_chr22-5	ENSG00000100138.13	chr22	41674804	41674845	-	unique
pA_chr7-20	ENSG00000196683.10	chr7	22812987	22813028	-	unique
pA_chr1-20	ENSG00000162909.17	chr1	223775789	223775830	+	unique
pA_chr7-11	ENSG00000127920.5	chr7	93926473	93926514	+	unique
pA_chr3-28	ENSG00000067560.10	chr3	49359138	49359179	-	unique
pA_chr11-63	ENSG00000149100.12	chr11	32602427	32602468	+	unique
pA_chr5-11	ENSG00000113407.13	chr5	33468034	33468075	+	unique
pA_chr2-56	ENSG00000115053.15	chr2	231454891	231454932	-	unique
pA_chrX-10	ENSG00000147065.16	chrX	65741886	65741927	+	unique
pA_chr3-37	ENSG00000114902.13	chr3	52708127	52708168	+	unique
pA_chr16-1	ENSG00000140988.15	chr16	1962044	1962085	-	unique
pA_chr5-18	ENSG00000113732.8	chr5	173034840	173034881	+	unique
pA_chr5-12	ENSG00000171421.12	chr5	1798389	1798430	-	unique
pA_chr7-9	ENSG00000075618.17	chr7	5606600	5606641	+	unique
pA_chr12-24	ENSG00000086598.10	chr12	123598091	123598132	+	unique
pA_chr12-13	ENSG00000008394.12	chr12	16364359	16364400	+	unique
pA_chr17-11	ENSG00000087191.12	chr17	63831979	63832020	+	unique
pA_chr7-73	ENSG00000146731.10	chr7	56063356	56063397	+	unique
pA_chr1-102	ENSG00000065978.18	chr1	42702315	42702356	+	unique
pA_chr8-10	ENSG00000147677.10	chr8	116644834	116644875	-	unique
pA_chr2-17	ENSG00000163466.15	chr2	218254303	218254344	+	unique
pA_chr12-22	ENSG00000139644.12	chr12	49764880	49764921	+	unique
pA_chr19-7	ENSG00000104904.12	chr19	2273205	2273246	+	unique
pA_chr5-21	ENSG00000164587.11	chr5	150444228	150444269	-	unique
pA_chr5-19	ENSG00000113460.12	chr5	34925630	34925671	+	unique
pA_chr21-4	ENSG00000142168.14	chr21	31668630	31668671	+	unique
pA_chr6-11	ENSG00000112306.7	chr6	132817511	132817552	+	unique
pA_chr3-116	ENSG00000168374.10	chr3	57571363	57571404	-	unique
pA_chrX-5	ENSG00000125356.6	chrX	119876618	119876659	+	unique
pA_chr6-66	ENSG00000204389.9	chr6	31817898	31817939	+	unique
pA_chr9-30	ENSG00000119335.16	chr9	128696350	128696391	+	unique
pA_chr22-32	ENSG00000100216.5	chr22	38684446	38684487	+	unique
pA_chr20-29	ENSG00000088832.15	chr20	1368980	1369021	-	unique
pA_chr7-38	ENSG00000105887.10	chr7	135926744	135926785	-	unique
pA_chr20-28	ENSG00000124172.9	chr20	59028678	59028719	-	unique
pA_chr5-43	ENSG00000120708.16	chr5	136063776	136063817	+	unique
pA_chr7-4	ENSG00000241468.7	chr7	99458198	99458239	-	unique
pA_chr12-12	ENSG00000111669.14	chr12	6870794	6870835	+	unique
pA_chr19-13	ENSG00000105538.9	chr19	48720582	48720623	-	unique
pA_chr6-23	ENSG00000112695.11	chr6	75237783	75237824	-	unique
pA_chr20-5	ENSG00000175063.16	chr20	45816906	45816947	+	unique
pA_chr7-5	ENSG00000170027.6	chr7	76326792	76326833	-	unique
pA_chr6-37	ENSG00000196230.12	chr6	30724532	30724573	+	unique
pA_chr11-10	ENSG00000150687.11	chr11	86809125	86809166	+	unique
pA_chr12-26	ENSG00000134294.13	chr12	46358193	46358234	-	unique
pA_chr17-24	ENSG00000141030.12	chr17	17246831	17246872	-	unique
pA_chr2-100	ENSG00000172428.10	chr2	240130813	240130854	-	unique
pA_chr4-4	ENSG00000179010.14	chr4	6642689	6642730	+	unique
pA_chr12-36	ENSG00000215021.8	chr12	6965349	6965390	-	unique
pA_chr20-9	ENSG00000101084.16	chr20	36612507	36612548	+	unique
pA_chr16-12	ENSG00000006327.13	chr16	3022333	3022374	+	unique
pA_chr6-8	ENSG00000008018.8	chr6	170535119	170535160	-	unique
pA_chr2-12	ENSG00000079246.15	chr2	216205373	216205414	+	unique
pA_chr2-36	ENSG00000115310.17	chr2	54972184	54972225	-	unique
pA_chr5-9	ENSG00000113013.12	chr5	138555338	138555379	-	unique
pA_chr9-15	ENSG00000136888.6	chr9	114598330	114598371	+	unique
pA_chr3-69	ENSG00000157020.17	chr3	10300927	10300968	-	unique
pA_chr17-69	ENSG00000277791.4	chr17	38764176	38764217	+	unique
pA_chr17-10	ENSG00000224877.3	chr17	81241230	81241271	+	unique
pA_chr11-4	ENSG00000168003.16	chr11	62888825	62888866	+	unique
pA_chr10-11	ENSG00000151465.13	chr10	12250531	12250572	+	unique
pA_chr1-186	ENSG00000116649.9	chr1	11054593	11054634	-	unique
pA_chr1-60	ENSG00000130770.17	chr1	28238045	28238086	+	unique
pA_chr16-65	ENSG00000004779.9	chr16	23581003	23581044	-	unique
pA_chr9-6	ENSG00000130558.19	chr9	135121139	135121180	+	unique
pA_chr5-22	ENSG00000164611.12	chr5	160428686	160428727	+	unique
pA_chr7-68	ENSG00000105968.18	chr7	44834237	44834278	-	unique
pA_chr7-33	ENSG00000106263.17	chr7	2380697	2380738	+	unique
pA_chr10-10	ENSG00000067057.16	chr10	3136752	3136793	+	unique
pA_chr3-10	ENSG00000170860.3	chr3	14198299	14198340	+	unique
pA_chr14-17	ENSG00000100567.12	chr14	58271958	58271999	+	unique
pA_chr1-31	ENSG00000163479.13	chr1	156009048	156009089	-	unique
pA_chr10-24	ENSG00000057608.16	chr10	5765228	5765269	-	unique
pA_chr14-15	ENSG00000156411.9	chr14	103912515	103912556	-	unique
pA_chr22-18	ENSG00000100387.8	chr22	40972618	40972659	+	unique
pA_chr22-17	ENSG00000196419.12	chr22	41663996	41664037	+	unique
pA_chr16-15	ENSG00000170540.14	chr16	18791675	18791716	-	unique
pA_chr9-19	ENSG00000148229.12	chr9	113407232	113407273	-	unique
pA_chr1-11	ENSG00000175756.13	chr1	1373725	1373766	-	unique
pA_chr21-5	ENSG00000241837.6	chr21	33903442	33903483	-	unique
pA_chr12-19	ENSG00000123349.13	chr12	53299411	53299452	+	unique
pA_chr15-3	ENSG00000041357.15	chr15	78549165	78549206	+	unique
pA_chr12-96	ENSG00000151239.13	chr12	43793721	43793762	-	unique
pA_chr11-20	ENSG00000181649.5	chr11	2928422	2928463	-	unique
pA_chr13-7	ENSG00000102804.14	chr13	44433518	44433559	-	unique
pA_chr15-33	ENSG00000182117.5	chr15	34341719	34341760	-	unique
pA_chr22-55	ENSG00000099901.16	chr22	20127148	20127189	+	unique
pA_chr2-120	ENSG00000119013.8	chr2	201085703	201085744	+	unique
pA_chr6-51	ENSG00000204387.12	chr6	31839706	31839747	+	unique
pA_chr16-41	ENSG00000089280.18	chr16	31191554	31191595	+	unique
pA_chr9-31	ENSG00000122705.16	chr9	36212004	36212045	+	unique
pA_chr1-136	ENSG00000153187.17	chr1	244853661	244853702	-	unique
pA_chr8-29	ENSG00000156467.9	chr8	96230923	96230964	-	unique
pA_chr16-27	ENSG00000179958.8	chr16	30423696	30423737	-	unique
pA_chr5-34	ENSG00000113648.16	chr5	135334376	135334417	-	unique
pA_chr8-32	ENSG00000179091.4	chr8	144097478	144097519	+	unique
pA_chr1-361	ENSG00000069275.12	chr1	205713192	205713233	-	unique
pA_chr1-10	ENSG00000134375.10	chr1	201970305	201970346	+	unique
pA_chr1-5	ENSG00000117318.8	chr1	23557934	23557975	-	unique
pA_chr2-11	ENSG00000115541.10	chr2	197503403	197503444	+	unique
pA_chr11-89	ENSG00000134825.14	chr11	61789139	61789180	-	unique
pA_chr15-29	ENSG00000140391.14	chr15	77046013	77046054	-	unique
pA_chr16-10	ENSG00000065427.14	chr16	75627722	75627763	-	unique
pA_chr17-25	ENSG00000142507.9	chr17	4798451	4798492	+	unique
pA_chr8-18	ENSG00000104341.16	chr8	97852552	97852593	+	unique
pA_chr19-34	ENSG00000104979.8	chr19	13778409	13778450	+	unique
pA_chr19-175	ENSG00000099795.6	chr19	14566074	14566115	-	unique
pA_chr20-3	ENSG00000125868.15	chr20	17607961	17608002	+	unique
pA_chr10-25	ENSG00000169813.16	chr10	43386010	43386051	-	unique
pA_chr2-6	ENSG00000115053.15	chr2	231454745	231454786	-	unique
pA_chr2-42	ENSG00000115241.10	chr2	27381210	27381251	-	unique
pA_chr19-58	ENSG00000179218.13	chr19	12944435	12944476	+	unique
pA_chr2-31	ENSG00000115128.6	chr2	24067589	24067630	-	unique
pA_chr2-18	ENSG00000135624.15	chr2	73252966	73253007	+	unique
pA_chr3-33	ENSG00000169908.11	chr3	149369685	149369726	-	unique
pA_chr11-6	ENSG00000085063.14	chr11	33708852	33708893	-	unique
pA_chr18-6	ENSG00000101608.12	chr18	3256200	3256241	+	unique
pA_chr3-13	ENSG00000175166.16	chr3	184309003	184309044	+	unique
pA_chr19-10	ENSG00000130402.11	chr19	38730480	38730521	+	unique
pA_chr19-47	ENSG00000095752.6	chr19	55364389	55364430	-	unique
pA_chr7-3	ENSG00000146701.11	chr7	76066550	76066591	+	unique
pA_chr19-32	ENSG00000099783.11	chr19	8489063	8489104	+	unique
pA_chr1-70	ENSG00000242485.5	chr1	1401928	1401969	-	unique
pA_chr16-18	ENSG00000140990.14	chr16	1961928	1961969	+	unique
pA_chr19-25	ENSG00000178982.9	chr19	38636900	38636941	+	unique
pA_chr2-21	ENSG00000119185.12	chr2	9406654	9406695	-	unique
pA_chr11-60	ENSG00000174547.13	chr11	66435833	66435874	-	unique
pA_chr19-85	ENSG00000104904.12	chr19	2273435	2273476	+	unique
pA_chr13-6	ENSG00000133112.16	chr13	45336884	45336925	-	unique
pA_chr15-59	ENSG00000131876.16	chr15	101281513	101281554	-	unique
pA_chr12-60	ENSG00000111057.10	chr12	52952859	52952900	+	unique
pA_chr11-56	ENSG00000173457.10	chr11	64244487	64244528	-	unique
pA_chr21-12	ENSG00000160213.5	chr21	43773949	43773990	-	unique
pA_chr1-43	ENSG00000143621.16	chr1	153662034	153662075	-	unique
pA_chr6-35	ENSG00000112378.11	chr6	138090789	138090830	-	unique
pA_chr2-20	ENSG00000135919.12	chr2	223975143	223975184	-	unique
pA_chr14-25	ENSG00000165502.6	chr14	49618703	49618744	-	unique
pA_chr2-10	ENSG00000169564.6	chr2	70089128	70089169	+	unique
pA_chr18-7	ENSG00000152234.15	chr18	46084146	46084187	-	unique
pA_chr1-184	ENSG00000159176.13	chr1	201483536	201483577	-	unique
pA_chr1-18	ENSG00000143106.12	chr1	109401853	109401894	-	unique
pA_chr3-39	ENSG00000114850.6	chr3	156540141	156540182	-	unique
pA_chr2-29	ENSG00000065548.17	chr2	186509317	186509358	+	unique
pA_chr10-8	ENSG00000165629.19	chr10	7807763	7807804	+	unique
pA_chr10-16	ENSG00000168209.4	chr10	72275983	72276024	+	unique
pA_chr6-6	ENSG00000276966.2	chr6	26204962	26205003	+	unique
pA_chr11-43	ENSG00000026508.16	chr11	35229977	35230018	+	unique
pA_chr22-3	ENSG00000239900.12	chr22	40366516	40366557	+	unique
pA_chr3-7	ENSG00000069849.10	chr3	141926144	141926185	+	unique
pA_chr1-62	ENSG00000125944.18	chr1	23309786	23309827	-	unique
pA_chr16-14	ENSG00000171490.12	chr16	11837344	11837385	-	unique
pA_chr1-39	ENSG00000004455.16	chr1	33013048	33013089	-	unique
pA_chr5-13	ENSG00000249915.7	chr5	314928	314969	+	unique
pA_chr4-12	ENSG00000164104.11	chr4	173331701	173331742	-	unique
pA_chr1-16	ENSG00000084623.11	chr1	32231551	32231592	+	unique
pA_chr13-5	ENSG00000122034.13	chr13	27435646	27435687	+	unique
pA_chr17-20	ENSG00000108344.14	chr17	39997911	39997952	+	unique
pA_chr19-5	ENSG00000105220.14	chr19	34400295	34400336	+	unique
pA_chr14-19	ENSG00000100591.7	chr14	77469415	77469456	+	unique
pA_chr11-31	ENSG00000085063.14	chr11	33708665	33708706	-	unique
pA_chr14-29	ENSG00000129562.10	chr14	22564918	22564959	-	unique
pA_chr3-23	ENSG00000178035.11	chr3	49024329	49024370	-	unique
pA_chr2-87	ENSG00000055044.10	chr2	202303618	202303659	+	unique
pA_chr18-2	ENSG00000167088.10	chr18	21629200	21629241	+	unique
pA_chr20-13	ENSG00000087460.23	chr20	58911141	58911182	+	unique
pA_chrX-3	ENSG00000102007.10	chrX	49175057	49175098	+	unique
pA_chr14-13	ENSG00000100644.16	chr14	61748214	61748255	+	unique
pA_chr5-25	ENSG00000112977.15	chr5	10679237	10679278	-	unique
pA_chr1-105	ENSG00000168275.14	chr1	234383999	234384040	+	unique
pA_chr6-12	ENSG00000204435.13	chr6	31670012	31670053	+	unique
pA_chr17-163	ENSG00000175826.11	chr17	7243597	7243638	-	unique
pA_chr7-48	ENSG00000214194.8	chr7	113116722	113116763	-	unique
pA_chr11-14	ENSG00000026508.16	chr11	35232351	35232392	+	unique
pA_chr10-7	ENSG00000165678.20	chr10	84153127	84153168	+	unique
pA_chr5-10	ENSG00000113384.13	chr5	32124714	32124755	-	unique
pA_chr12-41	ENSG00000111786.8	chr12	120461679	120461720	-	unique
pA_chr9-24	ENSG00000136830.11	chr9	127505341	127505382	-	unique
pA_chr10-32	ENSG00000096746.17	chr10	68342228	68342269	+	unique
pA_chr18-5	ENSG00000178127.12	chr18	9134292	9134333	+	unique
pA_chr9-10	ENSG00000086061.15	chr9	33039012	33039053	+	unique
pA_chr4-18	ENSG00000198856.12	chr4	108667782	108667823	+	unique
pA_chr8-7	ENSG00000198363.16	chr8	61624541	61624582	-	unique
pA_chr7-116	ENSG00000105974.11	chr7	116561145	116561186	+	unique
pA_chr16-24	ENSG00000167526.13	chr16	89563403	89563444	+	unique
pA_chr16-134	ENSG00000103035.10	chr16	74305730	74305771	+	unique
pA_chr15-41	ENSG00000185088.13	chr15	63153866	63153907	-	unique
pA_chrX-8	ENSG00000196924.14	chrX	154348534	154348575	-	unique
pA_chr12-249	ENSG00000196531.10	chr12	56712426	56712467	-	unique
pA_chr6-48	ENSG00000124795.14	chr6	18224182	18224223	-	unique
pA_chr3-4	ENSG00000174748.18	chr3	23919751	23919792	+	unique
pA_chr10-13	ENSG00000165672.6	chr10	119167713	119167754	-	unique
pA_chr19-41	ENSG00000127540.11	chr19	1598042	1598083	-	unique
pA_chr5-98	ENSG00000155506.16	chr5	154817565	154817606	+	unique
pA_chr12-54	ENSG00000111229.15	chr12	110434893	110434934	-	unique
pA_chr1-25	ENSG00000143543.14	chr1	153974512	153974553	-	unique
pA_chr18-8	ENSG00000176014.12	chr18	12326529	12326570	+	unique
pA_chr2-43	ENSG00000169604.19	chr2	69249281	69249322	+	unique
pA_chr20-14	ENSG00000125835.18	chr20	2461642	2461683	-	unique
pA_chr17-35	ENSG00000108829.9	chr17	50381245	50381286	-	unique
pA_chr5-23	ENSG00000071539.13	chr5	918006	918047	+	unique
pA_chr10-90	ENSG00000148672.8	chr10	87050486	87050527	-	unique
pA_chr5-48	ENSG00000145912.8	chr5	178149464	178149505	-	unique
pA_chr7-77	ENSG00000136238.17	chr7	6403938	6403979	+	unique
pA_chr1-76	ENSG00000183291.15	chr1	86862724	86862765	-	unique
pA_chr17-38	ENSG00000173812.10	chr17	41691595	41691636	+	unique
pA_chrX-11	ENSG00000123131.12	chrX	23686346	23686387	+	unique
pA_chr9-16	ENSG00000107223.12	chr9	136862125	136862166	-	unique
pA_chr12-20	ENSG00000111328.6	chr12	123260989	123261030	-	unique
pA_chr1-127	ENSG00000121774.17	chr1	32043829	32043870	+	unique
pA_chr17-130	ENSG00000161960.14	chr17	7576915	7576956	+	unique
pA_chr8-23	ENSG00000156471.12	chr8	96334508	96334549	+	unique
pA_chr11-64	ENSG00000167996.15	chr11	61964544	61964585	-	unique
pA_chr2-23	ENSG00000127824.13	chr2	219250282	219250323	-	unique
pA_chrX-12	ENSG00000101856.9	chrX	119244419	119244460	+	unique
pA_chr1-40	ENSG00000159352.15	chr1	151267424	151267465	+	unique
pA_chr6-118	ENSG00000112335.14	chr6	108211512	108211553	-	unique
pA_chr20-37	ENSG00000166913.12	chr20	44906469	44906510	+	unique
pA_chr20-24	ENSG00000124207.16	chr20	49096546	49096587	+	unique
pA_chr20-7	ENSG00000172216.5	chr20	50192631	50192672	+	unique
pA_chr16-36	ENSG00000103363.14	chr16	2771953	2771994	-	unique
pA_chr9-63	ENSG00000048828.16	chr9	93566066	93566107	+	unique
pA_chr19-29	ENSG00000011304.18	chr19	812272	812313	+	unique
pA_chr1-88	ENSG00000116898.11	chr1	36455762	36455803	-	unique
pA_chr17-53	ENSG00000183684.7	chr17	81887841	81887882	-	unique
pA_chr2-132	ENSG00000168385.17	chr2	241353981	241354022	+	unique
pA_chr3-57	ENSG00000161203.13	chr3	184184044	184184085	+	unique
pA_chr15-15	ENSG00000134153.9	chr15	34084027	34084068	-	unique
pA_chr9-36	ENSG00000148248.13	chr9	133361459	133361500	-	unique
pA_chr16-23	ENSG00000181019.12	chr16	69710843	69710884	-	unique
pA_chr11-19	ENSG00000165916.8	chr11	47418772	47418813	-	unique
pA_chr22-2	ENSG00000100028.11	chr22	24572097	24572138	+	unique
pA_chr6-18	ENSG00000118515.11	chr6	134169254	134169295	-	unique
pA_chr12-27	ENSG00000197111.15	chr12	53479585	53479626	+	unique
pA_chr15-18	ENSG00000140307.10	chr15	59638866	59638907	-	unique
pA_chr2-30	ENSG00000228474.5	chr2	27070483	27070524	-	unique
pA_chr1-45	ENSG00000078369.17	chr1	1785300	1785341	-	unique
pA_chr5-97	ENSG00000177733.6	chr5	137752613	137752654	-	unique
pA_chr19-40	ENSG00000063244.12	chr19	55674664	55674705	+	unique
pA_chr18-4	ENSG00000176890.15	chr18	673450	673491	+	unique
pA_chr10-4	ENSG00000166033.11	chr10	122514858	122514899	+	unique
pA_chr17-183	ENSG00000159199.13	chr17	48895827	48895868	+	unique
pA_chr20-4	ENSG00000242372.6	chr20	35278910	35278951	-	unique
pA_chr1-193	ENSG00000143761.14	chr1	228099082	228099123	+	unique
pA_chr7-85	ENSG00000172115.8	chr7	25122817	25122858	-	unique
pA_chr1-34	ENSG00000143612.18	chr1	154206718	154206759	-	unique
pA_chr19-68	ENSG00000105583.9	chr19	12668077	12668118	-	unique
pA_chr1-65	ENSG00000143256.4	chr1	161100565	161100606	-	unique
pA_chr3-17	ENSG00000241553.12	chr3	9807050	9807091	+	unique
pA_chr1-41	ENSG00000117592.8	chr1	173488763	173488804	+	unique
pA_chr17-47	ENSG00000141522.11	chr17	81867724	81867765	-	unique
pA_chr3-19	ENSG00000188846.13	chr3	40462336	40462377	+	unique
pA_chr4-28	ENSG00000118816.9	chr4	77047160	77047201	-	unique
pA_chr19-274	ENSG00000132002.7	chr19	14514785	14514826	-	unique
pA_chr9-142	ENSG00000119421.6	chr9	122144059	122144100	-	unique
pA_chr5-91	ENSG00000169230.9	chr5	177306916	177306957	+	unique
pA_chr15-16	ENSG00000255302.4	chr15	48879765	48879806	+	unique
pA_chr15-36	ENSG00000128463.12	chr15	34230110	34230151	+	unique
pA_chr8-63	ENSG00000176731.11	chr8	85214504	85214545	-	unique
pA_chr7-81	ENSG00000161057.10	chr7	103368102	103368143	+	unique
pA_chr11-27	ENSG00000110107.8	chr11	60890729	60890770	-	unique
pA_chr3-140	ENSG00000163634.11	chr3	63833870	63833911	-	unique
pA_chr1-48	ENSG00000009307.15	chr1	114716919	114716960	-	unique
pA_chr11-118	ENSG00000177700.5	chr11	840197	840238	-	unique
pA_chr2-46	ENSG00000082153.17	chr2	200823801	200823842	+	unique
pA_chr3-95	ENSG00000174748.18	chr3	23920797	23920838	+	unique
pA_chr14-16	ENSG00000100528.11	chr14	54426930	54426971	-	unique
pA_chr11-79	ENSG00000149357.9	chr11	72097291	72097332	-	unique
pA_chr17-49	ENSG00000141552.17	chr17	81900210	81900251	+	unique
pA_chr18-3	ENSG00000101558.13	chr18	9954773	9954814	+	unique
pA_chr6-113	ENSG00000137409.19	chr6	36968156	36968197	-	unique
pA_chr7-12	ENSG00000106245.9	chr7	99419561	99419602	+	unique
pA_chr2-26	ENSG00000135940.6	chr2	97648141	97648182	+	unique
pA_chr12-177	ENSG00000177889.9	chr12	93409354	93409395	-	unique
pA_chr22-29	ENSG00000185721.11	chr22	31434140	31434181	+	unique
pA_chr9-11	ENSG00000086062.12	chr9	33110652	33110693	-	unique
pA_chr7-36	ENSG00000241685.8	chr7	99366221	99366262	+	unique
pA_chr2-32	ENSG00000014641.17	chr2	63607148	63607189	+	unique
pA_chr19-23	ENSG00000198258.10	chr19	9830077	9830118	+	unique
pA_chrX-39	ENSG00000166681.13	chrX	103378030	103378071	+	unique
pA_chr10-5	ENSG00000148834.12	chr10	104267405	104267446	+	unique
pA_chr7-31	ENSG00000136261.14	chr7	16706473	16706514	+	unique
pA_chr5-2	ENSG00000184840.11	chr5	177596065	177596106	+	unique
pA_chrX-44	ENSG00000165704.14	chrX	134500631	134500672	+	unique
pA_chr2-39	ENSG00000138363.14	chr2	215349717	215349758	+	unique
pA_chr17-87	ENSG00000161547.15	chr17	76734119	76734160	-	unique
pA_chr16-35	ENSG00000103275.19	chr16	1325304	1325345	+	unique
pA_chr17-19	ENSG00000131473.16	chr17	41866919	41866960	-	unique
pA_chr5-60	ENSG00000113719.15	chr5	172952636	172952677	+	unique
pA_chr12-5	ENSG00000159335.15	chr12	6770902	6770943	+	unique
pA_chr2-40	ENSG00000068697.6	chr2	20032655	20032696	-	unique
pA_chr1-26	ENSG00000142937.11	chr1	44778681	44778722	+	unique
pA_chr12-77	ENSG00000187109.13	chr12	76047591	76047632	-	unique
pA_chrX-19	ENSG00000155959.10	chrX	155239781	155239822	+	unique
pA_chr15-11	ENSG00000166803.10	chr15	64365585	64365626	-	unique
pA_chr14-34	ENSG00000100823.11	chr14	20457718	20457759	+	unique
pA_chr17-31	ENSG00000141543.9	chr17	80135253	80135294	-	unique
pA_chr22-30	ENSG00000130638.15	chr22	45843938	45843979	+	unique
pA_chr6-22	ENSG00000225921.6	chr6	13620867	13620908	+	unique
pA_chr11-24	ENSG00000026508.16	chr11	35229422	35229463	+	unique
pA_chr15-6	ENSG00000140416.19	chr15	63071865	63071906	+	unique
pA_chr20-22	ENSG00000130706.12	chr20	62308812	62308853	+	unique
pA_chr17-99	ENSG00000062716.11	chr17	59840544	59840585	+	unique
pA_chr16-26	ENSG00000103342.12	chr16	11872676	11872717	-	unique
pA_chr14-10	ENSG00000072110.13	chr14	68874317	68874358	-	unique
pA_chr19-18	ENSG00000179271.2	chr19	12954168	12954209	-	unique
pA_chr2-85	ENSG00000115233.11	chr2	161411671	161411712	+	unique
pA_chr3-6	ENSG00000145050.15	chr3	51389294	51389335	+	unique
pA_chr1-194	ENSG00000173726.10	chr1	235109329	235109370	-	unique
pA_chr17-373	ENSG00000132475.9	chr17	75778261	75778302	-	unique
pA_chr2-13	ENSG00000138085.16	chr2	27217118	27217159	+	unique
pA_chrX-36	ENSG00000215301.9	chrX	41350156	41350197	+	unique
pA_chr4-11	ENSG00000109390.11	chr4	139289943	139289984	-	unique
pA_chr12-197	ENSG00000133639.4	chr12	92143129	92143170	-	unique
pA_chr1-17	ENSG00000117632.21	chr1	25900562	25900603	-	unique
pA_chr2-63	ENSG00000196141.13	chr2	200478486	200478527	+	unique
pA_chr17-155	ENSG00000213977.7	chr17	3662894	3662935	-	unique
pA_chr2-44	ENSG00000115944.14	chr2	42350498	42350539	-	unique
pA_chr8-58	ENSG00000078668.13	chr8	42405852	42405893	+	unique
pA_chr9-14	ENSG00000119403.13	chr9	120869583	120869624	-	unique
pA_chr15-19	ENSG00000140374.15	chr15	76216285	76216326	-	unique
pA_chr1-75	ENSG00000203667.9	chr1	244843253	244843294	+	unique
pA_chr3-87	ENSG00000114125.13	chr3	141745660	141745701	+	unique
pA_chr7-49	ENSG00000128595.16	chr7	128771430	128771471	+	unique
pA_chr12-43	ENSG00000183283.15	chr12	51243729	51243770	+	unique
pA_chr6-87	ENSG00000112110.9	chr6	159798386	159798427	+	unique
pA_chr4-7	ENSG00000145425.9	chr4	151104604	151104645	+	unique
pA_chr5-44	ENSG00000133398.3	chr5	6371919	6371960	-	unique
pA_chr8-15	ENSG00000133872.13	chr8	30063094	30063135	-	unique
pA_chr19-37	ENSG00000123136.14	chr19	14408815	14408856	-	unique
pA_chr6-47	ENSG00000278828.1	chr6	27810477	27810518	+	unique
pA_chr16-30	ENSG00000230989.6	chr16	83811621	83811662	+	unique
pA_chr13-18	ENSG00000188243.12	chr13	75526429	75526470	-	unique
pA_chr4-25	ENSG00000169020.9	chr4	672441	672482	-	unique
pA_chr1-154	ENSG00000163399.15	chr1	116404727	116404768	+	unique
pA_chr6-28	ENSG00000112514.15	chr6	33416548	33416589	-	unique
pA_chr11-193	ENSG00000134802.17	chr11	57406952	57406993	-	unique
pA_chr19-64	ENSG00000099817.11	chr19	1088168	1088209	-	unique
pA_chr5-42	ENSG00000127022.14	chr5	179730879	179730920	+	unique
pA_chr12-199	ENSG00000184752.12	chr12	94971327	94971368	-	unique
pA_chr2-57	ENSG00000155368.16	chr2	119372503	119372544	+	unique
pA_chr2-155	ENSG00000168288.12	chr2	149569629	149569670	-	unique
pA_chr19-94	ENSG00000105373.18	chr19	47757005	47757046	+	unique
pA_chr11-40	ENSG00000110104.11	chr11	60851037	60851078	+	unique
pA_chr19-33	ENSG00000105401.7	chr19	10391120	10391161	-	unique
pA_chr19-17	ENSG00000126247.10	chr19	36150307	36150348	+	unique
pA_chr19-49	ENSG00000126457.21	chr19	49688402	49688443	+	unique
pA_chr22-8	ENSG00000100353.17	chr22	36510850	36510891	-	unique
pA_chr6-20	ENSG00000112081.16	chr6	36602245	36602286	+	unique
pA_chr17-72	ENSG00000109099.13	chr17	15229775	15229816	-	unique
pA_chr12-3	ENSG00000197111.15	chr12	53479772	53479813	+	unique
pA_chr19-97	ENSG00000130811.11	chr19	10115014	10115055	-	unique
pA_chr12-61	ENSG00000205352.10	chr12	53446602	53446643	+	unique
pA_chr11-47	ENSG00000168439.16	chr11	64204503	64204544	+	unique
pA_chr17-101	ENSG00000109113.18	chr17	28714298	28714339	-	unique
pA_chr6-55	ENSG00000124562.9	chr6	34773741	34773782	+	unique
pA_chr6-78	ENSG00000135535.15	chr6	109366510	109366551	-	unique
pA_chr3-119	ENSG00000254999.3	chr3	10126874	10126915	+	unique
pA_chr5-223	ENSG00000169230.9	chr5	177306617	177306658	+	unique
pA_chr12-79	ENSG00000126749.14	chr12	6975944	6975985	+	unique
pA_chr1-66	ENSG00000090273.13	chr1	26946354	26946395	+	unique
pA_chr7-23	ENSG00000172354.9	chr7	100679117	100679158	+	unique
pA_chr10-18	ENSG00000107949.16	chr10	125836514	125836555	+	unique
pA_chr1-217	ENSG00000070831.15	chr1	22092899	22092940	+	unique
pA_chr22-43	ENSG00000184076.13	chr22	29769896	29769937	+	unique
pA_chr5-35	ENSG00000037474.14	chr5	6599236	6599277	-	unique
pA_chr5-74	ENSG00000113387.11	chr5	32601217	32601258	+	unique
pA_chr21-3	ENSG00000183255.11	chr21	44849599	44849640	-	unique
pA_chr19-24	ENSG00000126267.8	chr19	35658734	35658775	+	unique
pA_chr13-3	ENSG00000185896.10	chr13	113323377	113323418	+	unique
pA_chr12-47	ENSG00000089220.4	chr12	118145536	118145577	+	unique
pA_chr20-39	ENSG00000101132.9	chr20	54219168	54219209	+	unique
pA_chr18-14	ENSG00000134046.11	chr18	54154839	54154880	-	unique
pA_chr21-6	ENSG00000184900.15	chr21	44805620	44805661	-	unique
pA_chr20-16	ENSG00000125534.9	chr20	63522125	63522166	+	unique
pA_chr1-59	ENSG00000117410.13	chr1	43978249	43978290	+	unique
pA_chr11-58	ENSG00000213619.9	chr11	47584515	47584556	+	unique
pA_chr7-10	ENSG00000106348.16	chr7	128392287	128392328	-	unique
pA_chr12-30	ENSG00000127314.17	chr12	68660476	68660517	+	unique
pA_chr7-79	ENSG00000087077.12	chr7	100873400	100873441	+	unique
pA_chr7-17	ENSG00000091136.13	chr7	107923791	107923832	-	unique
pA_chr7-15	ENSG00000128524.4	chr7	128865799	128865840	+	unique
pA_chr4-39	ENSG00000128050.8	chr4	56461316	56461357	+	unique
pA_chr6-17	ENSG00000169976.6	chr6	144094885	144094926	-	unique
pA_chr19-76	ENSG00000105355.8	chr19	4838335	4838376	-	unique
pA_chr20-131	ENSG00000125977.6	chr20	34089428	34089469	-	unique
pA_chr8-14	ENSG00000120533.12	chr8	109343632	109343673	+	unique
pA_chr3-5	ENSG00000163902.11	chr3	128619967	128620008	-	unique
pA_chr21-20	ENSG00000154719.13	chr21	25585659	25585700	-	unique
pA_chr11-38	ENSG00000149136.8	chr11	57325981	57326022	-	unique
pA_chr11-54	ENSG00000085063.14	chr11	33709435	33709476	-	unique
pA_chr11-103	ENSG00000076043.9	chr11	114450221	114450262	+	unique
pA_chr2-25	ENSG00000115677.16	chr2	241229213	241229254	-	unique
pA_chr1-316	ENSG00000091483.6	chr1	241497788	241497829	-	unique
pA_chr7-56	ENSG00000071462.11	chr7	73698168	73698209	+	unique
pA_chr14-14	ENSG00000131981.15	chr14	55145374	55145415	+	unique
pA_chr15-80	ENSG00000166797.10	chr15	64072574	64072615	-	unique
pA_chr19-172	ENSG00000130332.14	chr19	2321515	2321556	-	unique
pA_chr17-70	ENSG00000108774.14	chr17	42124981	42125022	-	unique
pA_chr11-48	ENSG00000197345.12	chr11	68891286	68891327	-	unique
pA_chr22-23	ENSG00000100142.14	chr22	37967756	37967797	+	unique
pA_chr12-45	ENSG00000004478.7	chr12	2803911	2803952	+	unique
pA_chr3-30	ENSG00000136521.12	chr3	179624444	179624485	+	unique
pA_chr15-20	ENSG00000140612.13	chr15	84669546	84669587	-	unique
pA_chr7-54	ENSG00000106355.9	chr7	32487038	32487079	-	unique
pA_chr20-23	ENSG00000125995.15	chr20	35700944	35700985	+	unique
pA_chr19-55	ENSG00000167644.11	chr19	38304964	38305005	+	unique
pA_chr7-58	ENSG00000136231.13	chr7	23310219	23310260	-	unique
pA_chr16-61	ENSG00000178952.9	chr16	28842790	28842831	-	unique
pA_chr1-173	ENSG00000009307.15	chr1	114717299	114717340	-	unique
pA_chr12-80	ENSG00000111371.15	chr12	46183061	46183102	-	unique
pA_chr1-79	ENSG00000143641.9	chr1	230282083	230282124	+	unique
pA_chr7-27	ENSG00000164713.9	chr7	98291481	98291522	+	unique
pA_chr12-74	ENSG00000187109.13	chr12	76049560	76049601	-	unique
pA_chr22-65	ENSG00000099977.13	chr22	23971381	23971422	-	unique
pA_chr1-174	ENSG00000143436.10	chr1	151759645	151759686	-	unique
pA_chr17-92	ENSG00000108671.9	chr17	32482330	32482371	+	unique
pA_chr1-182	ENSG00000117592.8	chr1	173487975	173488016	+	unique
pA_chr2-257	ENSG00000138071.13	chr2	65271207	65271248	+	unique
pA_chr5-33	ENSG00000048162.20	chr5	176383950	176383991	-	unique
pA_chr7-64	ENSG00000105854.12	chr7	95404872	95404913	-	unique
pA_chr2-262	ENSG00000163541.11	chr2	84423541	84423582	-	unique
pA_chr3-50	ENSG00000114686.8	chr3	131462373	131462414	-	unique
pA_chr12-28	ENSG00000135390.17	chr12	53665172	53665213	-	unique
pA_chr6-79	ENSG00000196591.11	chr6	113940705	113940746	-	unique
pA_chr9-22	ENSG00000148291.9	chr9	133361118	133361159	+	unique
pA_chr1-98	ENSG00000116221.15	chr1	54218326	54218367	+	unique
pA_chr12-49	ENSG00000247077.6	chr12	132722687	132722728	+	unique
pA_chr11-7	ENSG00000168066.20	chr11	64764609	64764650	-	unique
pA_chr5-20	ENSG00000113575.9	chr5	134197094	134197135	-	unique
pA_chr15-10	ENSG00000166557.12	chr15	79322795	79322836	+	unique
pA_chrX-75	ENSG00000147123.10	chrX	47142215	47142256	-	unique
pA_chr9-53	ENSG00000147889.17	chr9	21967759	21967800	-	unique
pA_chr19-42	ENSG00000186010.18	chr19	19528142	19528183	+	unique
pA_chr11-68	ENSG00000172531.14	chr11	67398182	67398223	-	unique
pA_chr14-48	ENSG00000092199.17	chr14	21210539	21210580	-	unique
pA_chr14-44	ENSG00000126777.17	chr14	55684531	55684572	+	unique
pA_chr8-49	ENSG00000104687.12	chr8	30678060	30678101	-	unique
pA_chr1-290	ENSG00000160075.11	chr1	1541672	1541713	-	unique
pA_chr6-129	ENSG00000155115.6	chr6	110967829	110967870	+	unique
pA_chr22-20	ENSG00000184983.9	chr22	42086102	42086143	-	unique
pA_chr14-43	ENSG00000172590.18	chr14	22834302	22834343	+	unique
pA_chr16-7	ENSG00000074071.14	chr16	1771899	1771940	-	unique
pA_chr1-176	ENSG00000143771.11	chr1	224375944	224375985	+	unique
pA_chr12-73	ENSG00000257727.5	chr12	56310437	56310478	-	unique
pA_chr3-62	ENSG00000070087.13	chr3	149964917	149964958	-	unique
pA_chrX-28	ENSG00000130826.16	chrX	154777638	154777679	+	unique
pA_chrX-9	ENSG00000102024.17	chrX	115650625	115650666	+	unique
pA_chr5-276	ENSG00000122203.14	chr5	176346067	176346108	-	unique
pA_chrX-20	ENSG00000072506.12	chrX	53431260	53431301	-	unique
pA_chr5-179	ENSG00000082515.17	chr5	154966930	154966971	+	unique
pA_chr13-24	ENSG00000118939.17	chr13	75605893	75605934	+	unique
pA_chr21-7	ENSG00000154723.12	chr21	25724554	25724595	-	unique
pA_chr3-100	ENSG00000163584.17	chr3	170866263	170866304	-	unique
pA_chr10-31	ENSG00000165609.12	chr10	12167572	12167613	-	unique
pA_chr9-81	ENSG00000119318.12	chr9	107330845	107330886	+	unique
pA_chr2-66	ENSG00000115919.14	chr2	143042267	143042308	+	unique
pA_chr20-36	ENSG00000125868.15	chr20	17608190	17608231	+	unique
pA_chr1-149	ENSG00000266472.5	chr1	150308322	150308363	+	unique
pA_chr2-45	ENSG00000138069.16	chr2	65087873	65087914	-	unique
pA_chr5-46	ENSG00000145919.10	chr5	173607526	173607567	-	unique
pA_chr17-225	ENSG00000132475.9	chr17	75778033	75778074	-	unique
pA_chr6-16	ENSG00000112118.17	chr6	52264010	52264051	-	unique
pA_chr13-16	ENSG00000126226.21	chr13	113177609	113177650	-	unique
pA_chr14-12	ENSG00000166165.12	chr14	103519669	103519710	-	unique
pA_chr19-120	ENSG00000074842.7	chr19	4657543	4657584	-	unique
pA_chr10-23	ENSG00000165637.13	chr10	75231234	75231275	+	unique
pA_chr2-82	ENSG00000115307.16	chr2	74526647	74526688	-	unique
pA_chr19-157	ENSG00000179115.10	chr19	12922480	12922521	-	unique
pA_chr2-168	ENSG00000128699.13	chr2	189771308	189771349	-	unique
pA_chr7-29	ENSG00000196262.13	chr7	44801598	44801639	+	unique
pA_chr1-156	ENSG00000069275.12	chr1	205717986	205718027	-	unique
pA_chr5-72	ENSG00000181163.13	chr5	171410863	171410904	+	unique
pA_chr7-22	ENSG00000106400.11	chr7	101224144	101224185	+	unique
pA_chr18-12	ENSG00000141424.12	chr18	36108529	36108570	-	unique
pA_chr11-78	ENSG00000129084.17	chr11	14504880	14504921	-	unique
pA_chr5-51	ENSG00000170606.13	chr5	133104435	133104476	+	unique
pA_chr16-77	ENSG00000166851.14	chr16	23690318	23690359	+	unique
pA_chr17-21	ENSG00000108826.15	chr17	50367872	50367913	-	unique
pA_chr1-73	ENSG00000126067.11	chr1	35603146	35603187	-	unique
pA_chr8-60	ENSG00000121022.13	chr8	67043079	67043120	-	unique
pA_chr4-37	ENSG00000151012.13	chr4	138164084	138164125	-	unique
pA_chr16-22	ENSG00000102898.11	chr16	67871270	67871311	+	unique
pA_chr1-119	ENSG00000131238.16	chr1	40072712	40072753	-	unique
pA_chr8-48	ENSG00000147649.9	chr8	97726274	97726315	+	unique
pA_chr1-159	ENSG00000184007.18	chr1	31906413	31906454	-	unique
pA_chr19-31	ENSG00000099341.11	chr19	38383435	38383476	+	unique
pA_chr3-71	ENSG00000249992.1	chr3	45224468	45224509	-	unique
pA_chr12-88	ENSG00000235162.8	chr12	105371215	105371256	+	unique
pA_chr2-107	ENSG00000138434.16	chr2	181930685	181930726	+	unique
pA_chr18-22	ENSG00000168461.12	chr18	9862512	9862553	+	unique
pA_chr17-55	ENSG00000177469.12	chr17	42402463	42402504	-	unique
pA_chr2-33	ENSG00000079246.15	chr2	216206237	216206278	+	unique
pA_chr19-26	ENSG00000042753.11	chr19	46838163	46838204	-	unique
pA_chr1-204	ENSG00000143198.12	chr1	165655560	165655601	+	unique
pA_chr7-55	ENSG00000128609.14	chr7	123541032	123541073	-	unique
pA_chr7-221	ENSG00000075142.13	chr7	88206279	88206320	-	unique
pA_chr6-91	ENSG00000112081.16	chr6	36602741	36602782	+	unique
pA_chr19-44	ENSG00000130520.10	chr19	18306913	18306954	-	unique
pA_chr22-34	ENSG00000250479.8	chr22	23765837	23765878	-	unique
pA_chr16-76	ENSG00000007520.3	chr16	1349242	1349283	-	unique
pA_chr19-43	ENSG00000105393.15	chr19	17279297	17279338	+	unique
pA_chr3-43	ENSG00000067560.10	chr3	49359502	49359543	-	unique
pA_chr7-13	ENSG00000172336.4	chr7	100707447	100707488	+	unique
pA_chr13-9	ENSG00000102572.14	chr13	98452153	98452194	-	unique
pA_chr6-56	ENSG00000118508.4	chr6	146554911	146554952	+	unique
pA_chr7-18	ENSG00000197157.10	chr7	128092553	128092594	+	unique
pA_chr17-59	ENSG00000184640.17	chr17	77500548	77500589	+	unique
pA_chr1-276	ENSG00000116560.10	chr1	35183593	35183634	-	unique
pA_chr1-53	ENSG00000162368.13	chr1	47378785	47378826	+	unique
pA_chr7-25	ENSG00000106305.9	chr7	6023794	6023835	+	unique
pA_chr11-116	ENSG00000166012.15	chr11	93730279	93730320	-	unique
pA_chr10-49	ENSG00000165732.12	chr10	68985031	68985072	+	unique
pA_chr10-51	ENSG00000108179.13	chr10	79354667	79354708	+	unique
pA_chr1-47	ENSG00000162613.16	chr1	77948398	77948439	-	unique
pA_chr11-42	ENSG00000158042.8	chr11	6681924	6681965	-	unique
pA_chr11-71	ENSG00000171067.10	chr11	68261478	68261519	-	unique
pA_chr1-130	ENSG00000134248.13	chr1	110401246	110401287	-	unique
pA_chr7-65	ENSG00000004799.7	chr7	95583500	95583541	-	unique
pA_chr22-15	ENSG00000100138.13	chr22	41673942	41673983	-	unique
pA_chr6-33	ENSG00000203760.8	chr6	126348549	126348590	+	unique
pA_chr8-26	ENSG00000076554.15	chr8	80036606	80036647	-	unique
pA_chr8-22	ENSG00000185122.10	chr8	144314672	144314713	+	unique
pA_chr9-18	ENSG00000107262.17	chr9	33255035	33255076	-	unique
pA_chr11-39	ENSG00000110108.9	chr11	60923386	60923427	+	unique
pA_chr14-11	ENSG00000090060.17	chr14	96567066	96567107	+	unique
pA_chr19-50	ENSG00000099800.7	chr19	2426564	2426605	-	unique
pA_chr1-152	ENSG00000134202.10	chr1	109736972	109737013	-	unique
pA_chr3-75	ENSG00000163430.10	chr3	120394288	120394329	-	unique
pA_chr1-205	ENSG00000143158.10	chr1	167918070	167918111	-	unique
pA_chr14-24	ENSG00000170348.8	chr14	75134251	75134292	-	unique
pA_chr2-24	ENSG00000243147.7	chr2	27779696	27779737	+	unique
pA_chr19-107	ENSG00000105568.17	chr19	52226374	52226415	+	unique
pA_chr5-58	ENSG00000120705.12	chr5	138506096	138506137	-	unique
pA_chr22-37	ENSG00000185608.8	chr22	19436019	19436060	+	unique
pA_chr20-12	ENSG00000000419.12	chr20	50934862	50934903	-	unique
pA_chr17-8	ENSG00000141526.15	chr17	82239442	82239483	+	unique
pA_chr17-29	ENSG00000091542.8	chr17	18209905	18209946	+	unique
pA_chr17-112	ENSG00000167862.9	chr17	75021223	75021264	+	unique
pA_chr19-38	ENSG00000130312.6	chr19	17306795	17306836	+	unique
pA_chr17-119	ENSG00000133030.19	chr17	17185516	17185557	+	unique
pA_chr2-49	ENSG00000163466.15	chr2	218254080	218254121	+	unique
pA_chr9-34	ENSG00000119326.14	chr9	108942582	108942623	-	unique
pA_chr8-59	ENSG00000154582.16	chr8	73946619	73946660	-	unique
pA_chr8-13	ENSG00000120885.20	chr8	27597999	27598040	-	unique
pA_chr14-28	ENSG00000184990.12	chr14	104759609	104759650	+	unique
pA_chr11-77	ENSG00000074201.8	chr11	77616151	77616192	-	unique
pA_chr17-44	ENSG00000004142.11	chr17	28347184	28347225	-	unique
pA_chr3-49	ENSG00000114686.8	chr3	131462207	131462248	-	unique
pA_chr10-12	ENSG00000265354.3	chr10	46003683	46003724	+	unique
pA_chr10-74	ENSG00000266412.5	chr10	46005085	46005126	-	unique
pA_chr17-121	ENSG00000173812.10	chr17	41690961	41691002	+	unique
pA_chr5-27	ENSG00000044115.20	chr5	138934675	138934716	+	unique
pA_chr11-112	ENSG00000149547.14	chr11	125584638	125584679	+	unique
pA_chr2-65	ENSG00000115875.18	chr2	38744899	38744940	-	unique
pA_chr2-27	ENSG00000115484.14	chr2	61868424	61868465	-	unique
pA_chr2-86	ENSG00000138385.15	chr2	169812015	169812056	+	unique
pA_chr16-32	ENSG00000168488.18	chr16	28837175	28837216	+	unique
pA_chr3-34	ENSG00000164054.15	chr3	48467875	48467916	-	unique
pA_chr17-54	ENSG00000127774.6	chr17	3669619	3669660	+	unique
pA_chr19-111	ENSG00000183207.12	chr19	49015883	49015924	+	unique
pA_chr15-107	ENSG00000140612.13	chr15	84669731	84669772	-	unique
pA_chr12-87	ENSG00000111666.10	chr12	101729042	101729083	+	unique
pA_chrX-154	ENSG00000123562.16	chrX	103675502	103675543	-	unique
pA_chr1-24	ENSG00000159346.12	chr1	202940839	202940880	-	unique
pA_chr7-16	ENSG00000168090.9	chr7	100091876	100091917	+	unique
pA_chr11-91	ENSG00000166181.12	chr11	43344477	43344518	+	unique
pA_chr3-99	ENSG00000081154.11	chr3	101594403	101594444	+	unique
pA_chr5-157	ENSG00000164258.11	chr5	53683287	53683328	+	unique
pA_chr11-87	ENSG00000109861.15	chr11	88293597	88293638	-	unique
pA_chr15-58	ENSG00000198901.13	chr15	90966048	90966089	-	unique
pA_chr21-11	ENSG00000183527.11	chr21	39175458	39175499	-	unique
pA_chr9-62	ENSG00000135018.13	chr9	83659966	83660007	-	unique
pA_chr16-20	ENSG00000103266.10	chr16	682716	682757	+	unique
pA_chr3-38	ENSG00000184220.11	chr3	100178551	100178592	+	unique
pA_chr17-57	ENSG00000083457.11	chr17	3714634	3714675	-	unique
pA_chr4-95	ENSG00000164040.16	chr4	128270134	128270175	-	unique
pA_chr16-123	ENSG00000103035.10	chr16	74306245	74306286	+	unique
pA_chr8-36	ENSG00000175324.9	chr8	38163332	38163373	-	unique
pA_chr1-123	ENSG00000143570.17	chr1	153959108	153959149	-	unique
pA_chr11-45	ENSG00000213593.9	chr11	57740914	57740955	+	unique
pA_chr6-19	ENSG00000124783.12	chr6	7287569	7287610	-	unique
pA_chr1-82	ENSG00000171735.18	chr1	6871985	6872026	+	unique
pA_chr19-71	ENSG00000123144.10	chr19	12730645	12730686	-	unique
pA_chr6-85	ENSG00000118418.14	chr6	79201244	79201285	-	unique
pA_chr18-33	ENSG00000128789.20	chr18	12725698	12725739	+	unique
pA_chr19-166	ENSG00000176619.11	chr19	2428170	2428211	-	unique
pA_chr4-41	ENSG00000145220.13	chr4	4267706	4267747	-	unique
pA_chr2-60	ENSG00000168393.12	chr2	241675750	241675791	-	unique
pA_chr18-11	ENSG00000141759.14	chr18	79973500	79973541	-	unique
pA_chr20-19	ENSG00000022277.12	chr20	56518839	56518880	+	unique
pA_chr1-67	ENSG00000116478.11	chr1	32333581	32333622	+	unique
pA_chr9-55	ENSG00000148344.10	chr9	129738343	129738384	-	unique
pA_chr8-56	ENSG00000067167.7	chr8	70573442	70573483	-	unique
pA_chr5-41	ENSG00000113389.15	chr5	32791673	32791714	+	unique
pA_chr12-48	ENSG00000060982.14	chr12	24811360	24811401	-	unique
pA_chr11-82	ENSG00000186642.15	chr11	72576145	72576186	-	unique
pA_chr19-56	ENSG00000095752.6	chr19	55365555	55365596	-	unique
pA_chr16-40	ENSG00000167397.14	chr16	31090851	31090892	-	unique
pA_chr17-48	ENSG00000131467.10	chr17	42843187	42843228	+	unique
pA_chrX-27	ENSG00000126756.11	chrX	47651794	47651835	-	unique
pA_chr4-23	ENSG00000078140.13	chr4	39778584	39778625	+	unique
pA_chr3-76	ENSG00000184432.9	chr3	139357598	139357639	-	unique
pA_chr17-116	ENSG00000131747.14	chr17	40388523	40388564	-	unique
pA_chr14-65	ENSG00000134001.12	chr14	67383806	67383847	+	unique
pA_chr11-30	ENSG00000185627.17	chr11	252936	252977	+	unique
pA_chr1-295	ENSG00000171960.10	chr1	42676707	42676748	+	unique
pA_chr8-17	ENSG00000179950.13	chr8	143816369	143816410	-	unique
pA_chr19-134	ENSG00000105176.17	chr19	30015655	30015696	+	unique
pA_chr6-50	ENSG00000001036.13	chr6	143495491	143495532	-	unique
pA_chr18-9	ENSG00000118680.12	chr18	3278223	3278264	+	unique
pA_chr15-17	ENSG00000177971.8	chr15	75639096	75639137	-	unique
pA_chr14-42	ENSG00000183648.9	chr14	92116120	92116161	-	unique
pA_chr6-38	ENSG00000278705.1	chr6	26026901	26026942	-	unique
pA_chr11-108	ENSG00000126432.13	chr11	64321768	64321809	+	unique
pA_chr20-10	ENSG00000125968.8	chr20	31606465	31606506	+	unique
pA_chr11-34	ENSG00000188486.3	chr11	119093870	119093911	-	unique
pA_chr15-21	ENSG00000128951.13	chr15	48342368	48342409	+	unique
pA_chr4-72	ENSG00000109332.19	chr4	102796591	102796632	-	unique
pA_chr6-27	ENSG00000204568.11	chr6	30626343	30626384	+	unique
pA_chr14-18	ENSG00000119655.9	chr14	74479949	74479990	-	unique
pA_chr1-126	ENSG00000162704.15	chr1	183626203	183626244	-	unique
pA_chr1-484	ENSG00000116161.17	chr1	175010758	175010799	+	unique
pA_chr1-68	ENSG00000143420.17	chr1	150622131	150622172	-	unique
pA_chr17-66	ENSG00000177731.15	chr17	18244830	18244871	-	unique
pA_chr1-158	ENSG00000004487.15	chr1	23083643	23083684	+	unique
pA_chr2-171	ENSG00000082898.16	chr2	61477931	61477972	-	unique
pA_chr17-63	ENSG00000002834.17	chr17	38921722	38921763	+	unique
pA_chr12-35	ENSG00000139289.13	chr12	76029563	76029604	-	unique
pA_chr12-118	ENSG00000111361.12	chr12	123621031	123621072	-	unique
pA_chr16-63	ENSG00000181019.12	chr16	69709408	69709449	-	unique
pA_chr18-19	ENSG00000091164.12	chr18	56602821	56602862	-	unique
pA_chr2-118	ENSG00000163811.11	chr2	28948175	28948216	+	unique
pA_chr2-103	ENSG00000162961.13	chr2	32023900	32023941	-	unique
pA_chr1-164	ENSG00000116560.10	chr1	35184127	35184168	-	unique
pA_chr5-56	ENSG00000273841.4	chr5	69364744	69364785	-	unique
pA_chr15-82	ENSG00000174444.14	chr15	66499302	66499343	-	unique
pA_chr16-11	ENSG00000103495.13	chr16	29811121	29811162	+	unique
pA_chr4-31	ENSG00000164109.13	chr4	120059437	120059478	-	unique
pA_chr21-2	ENSG00000159228.12	chr21	36073119	36073160	+	unique
pA_chr1-120	ENSG00000172380.5	chr1	67701534	67701575	-	unique
pA_chr1-138	ENSG00000162385.10	chr1	53226919	53226960	-	unique
pA_chr1-166	ENSG00000143569.18	chr1	154263449	154263490	+	unique
pA_chr12-101	ENSG00000111142.13	chr12	95514301	95514342	+	unique
pA_chr17-67	ENSG00000185624.14	chr17	81843165	81843206	-	unique
pA_chr18-13	ENSG00000118680.12	chr18	3278138	3278179	+	unique
pA_chr20-6	ENSG00000101294.16	chr20	31569510	31569551	+	unique
pA_chr15-40	ENSG00000140350.15	chr15	68778910	68778951	-	unique
pA_chr10-20	ENSG00000154473.17	chr10	123165319	123165360	+	unique
pA_chr3-9	ENSG00000163636.10	chr3	64010550	64010591	-	unique
pA_chr12-66	ENSG00000111481.9	chr12	54351800	54351841	+	unique
pA_chr20-57	ENSG00000087586.17	chr20	56369387	56369428	-	unique
pA_chr17-147	ENSG00000175826.11	chr17	7243797	7243838	-	unique
pA_chr9-108	ENSG00000182154.7	chr9	137552508	137552549	+	unique
pA_chr19-118	ENSG00000130204.12	chr19	44903649	44903690	+	unique
pA_chr1-93	ENSG00000183520.11	chr1	38023763	38023804	+	unique
pA_chr3-21	ENSG00000090520.11	chr3	186585745	186585786	+	unique
pA_chr4-116	ENSG00000163319.10	chr4	83461182	83461223	+	unique
pA_chr1-78	ENSG00000155380.11	chr1	112912352	112912393	-	unique
pA_chr11-65	ENSG00000168002.11	chr11	62766665	62766706	+	unique
pA_chr1-29	ENSG00000188976.10	chr1	944212	944253	-	unique
pA_chr17-40	ENSG00000089685.14	chr17	78224667	78224708	+	unique
pA_chr6-29	ENSG00000124541.6	chr6	43029561	43029602	+	unique
pA_chr1-108	ENSG00000066322.13	chr1	43363402	43363443	-	unique
pA_chr8-19	ENSG00000169139.11	chr8	48061514	48061555	+	unique
pA_chr19-149	ENSG00000066044.14	chr19	7962284	7962325	-	unique
pA_chr2-69	ENSG00000198612.10	chr2	237098653	237098694	+	unique
pA_chr8-28	ENSG00000137575.11	chr8	58582808	58582849	+	unique
pA_chr11-99	ENSG00000168496.3	chr11	61797191	61797232	+	unique
pA_chr4-48	ENSG00000138668.18	chr4	82353978	82354019	-	unique
pA_chr9-37	ENSG00000165280.15	chr9	35056561	35056602	-	unique
pA_chr9-96	ENSG00000165689.16	chr9	136401921	136401962	-	unique
pA_chr1-219	ENSG00000180198.15	chr1	28538950	28538991	+	unique
pA_chr10-42	ENSG00000107833.10	chr10	101781329	101781370	-	unique
pA_chr17-56	ENSG00000125445.10	chr17	75266321	75266362	+	unique
pA_chr16-86	ENSG00000034713.7	chr16	75577831	75577872	+	unique
pA_chrX-86	ENSG00000147155.10	chrX	48528671	48528712	+	unique
pA_chr1-376	ENSG00000117862.11	chr1	52020129	52020170	-	unique
pA_chr1-433	ENSG00000153187.17	chr1	244854139	244854180	-	unique
pA_chr1-326	ENSG00000143222.11	chr1	161158807	161158848	+	unique
pA_chr7-84	ENSG00000122786.19	chr7	134970581	134970622	+	unique
pA_chr17-42	ENSG00000121073.13	chr17	49701308	49701349	-	unique
pA_chr2-102	ENSG00000213639.9	chr2	28800982	28801023	+	unique
pA_chr22-10	ENSG00000128245.14	chr22	31957547	31957588	+	unique
pA_chr6-100	ENSG00000112237.12	chr6	99542399	99542440	-	unique
pA_chr22-38	ENSG00000100345.20	chr22	36281279	36281320	-	unique
pA_chr5-187	ENSG00000145860.11	chr5	159157417	159157458	-	unique
pA_chr19-106	ENSG00000105438.8	chr19	48382571	48382612	-	unique
pA_chr7-272	ENSG00000157778.8	chr7	1567331	1567372	-	unique
pA_chr11-44	ENSG00000167325.14	chr11	4138830	4138871	+	unique
pA_chr7-259	ENSG00000122545.18	chr7	35905262	35905303	+	unique
pA_chr16-45	ENSG00000103018.16	chr16	69463760	69463801	+	unique
pA_chr1-178	ENSG00000179051.13	chr1	17406763	17406804	-	unique
pA_chr5-83	ENSG00000145555.14	chr5	16665297	16665338	-	unique
pA_chr5-104	ENSG00000131495.8	chr5	140645477	140645518	-	unique
pA_chr9-38	ENSG00000136950.13	chr9	124877370	124877411	+	unique
pA_chr14-101	ENSG00000100526.19	chr14	54420165	54420206	+	unique
pA_chr8-24	ENSG00000104613.11	chr8	19852029	19852070	+	unique
pA_chr19-35	ENSG00000125753.13	chr19	45526939	45526980	+	unique
pA_chr6-67	ENSG00000111832.12	chr6	116593230	116593271	+	unique
pA_chr19-16	ENSG00000105700.10	chr19	18569328	18569369	+	unique
pA_chr3-64	ENSG00000091317.7	chr3	32481310	32481351	-	unique
pA_chr3-61	ENSG00000188846.13	chr3	40462235	40462276	+	unique
pA_chr3-51	ENSG00000129055.12	chr3	134477718	134477759	-	unique
pA_chr19-116	ENSG00000105281.12	chr19	46774880	46774921	-	unique
pA_chr5-28	ENSG00000113068.9	chr5	140245065	140245106	-	unique
pA_chr16-46	ENSG00000103121.8	chr16	80975804	80975845	-	unique
pA_chr22-22	ENSG00000100410.7	chr22	41459711	41459752	-	unique
pA_chr6-41	ENSG00000112245.9	chr6	63583336	63583377	+	unique
pA_chr9-43	ENSG00000147955.16	chr9	34634719	34634760	-	unique
pA_chr14-23	ENSG00000100714.15	chr14	64459967	64460008	+	unique
pA_chr22-19	ENSG00000100243.20	chr22	42618813	42618854	-	unique
pA_chrX-32	ENSG00000102265.11	chrX	47586742	47586783	+	unique
pA_chrX-38	ENSG00000068438.14	chrX	48486254	48486295	+	unique
pA_chr12-68	ENSG00000136026.13	chr12	106237871	106237912	-	unique
pA_chr3-11	ENSG00000144867.11	chr3	133820630	133820671	+	unique
pA_chr10-162	ENSG00000166197.16	chr10	102163824	102163865	+	unique
pA_chr1-140	ENSG00000196352.14	chr1	207359673	207359714	+	unique
pA_chr15-105	ENSG00000140395.8	chr15	78283235	78283276	-	unique
pA_chr13-2	ENSG00000120675.5	chr13	43107387	43107428	+	unique
pA_chr1-144	ENSG00000142864.14	chr1	67411036	67411077	-	unique
pA_chr19-30	ENSG00000174886.12	chr19	5894680	5894721	-	unique
pA_chr5-52	ENSG00000131507.10	chr5	142152730	142152771	+	unique
pA_chr17-110	ENSG00000159111.12	chr17	47823457	47823498	-	unique
pA_chr5-82	ENSG00000145817.16	chr5	144159275	144159316	-	unique
pA_chr7-45	ENSG00000146731.10	chr7	56063942	56063983	+	unique
pA_chr1-298	ENSG00000092621.11	chr1	119744174	119744215	+	unique
pA_chr5-77	ENSG00000177556.11	chr5	151742821	151742862	-	unique
pA_chrX-88	ENSG00000147274.14	chrX	136869190	136869231	-	unique
pA_chr5-205	ENSG00000113328.18	chr5	163444973	163445014	+	unique
pA_chr6-32	ENSG00000135318.11	chr6	85495737	85495778	+	unique
pA_chrX-30	ENSG00000232119.7	chrX	120612340	120612381	+	unique
pA_chr8-20	ENSG00000164919.10	chr8	99878143	99878184	-	unique
pA_chrX-18	ENSG00000130826.16	chrX	154777535	154777576	+	unique
pA_chr1-92	ENSG00000117118.9	chr1	17018750	17018791	-	unique
pA_chr7-112	ENSG00000166508.17	chr7	100092768	100092809	-	unique
pA_chr12-137	ENSG00000235162.8	chr12	105371476	105371517	+	unique
pA_chr17-81	ENSG00000108654.12	chr17	64499624	64499665	-	unique
pA_chr11-325	ENSG00000149485.17	chr11	61799620	61799661	-	unique
pA_chr12-92	ENSG00000134287.9	chr12	48936205	48936246	-	unique
pA_chr20-15	ENSG00000101132.9	chr20	54219367	54219408	+	unique
pA_chr12-147	ENSG00000064102.14	chr12	26905184	26905225	-	unique
pA_chr12-57	ENSG00000174437.16	chr12	110347272	110347313	+	unique
pA_chr19-54	ENSG00000105677.11	chr19	35547476	35547517	+	unique
pA_chr3-41	ENSG00000168036.16	chr3	41240393	41240434	+	unique
pA_chr5-37	ENSG00000124275.14	chr5	7901073	7901114	+	unique
pA_chr6-109	ENSG00000012660.13	chr6	53267396	53267437	-	unique
pA_chr11-33	ENSG00000087365.15	chr11	66068853	66068894	+	unique
pA_chr12-112	ENSG00000134291.11	chr12	47968832	47968873	+	unique
pA_chr16-25	ENSG00000103202.12	chr16	400707	400748	+	unique
pA_chr17-236	ENSG00000176170.13	chr17	76387812	76387853	+	unique
pA_chr4-9	ENSG00000109332.19	chr4	102795969	102796010	-	unique
pA_chr1-181	ENSG00000197965.11	chr1	167790774	167790815	+	unique
pA_chr3-26	ENSG00000136518.16	chr3	179588361	179588402	+	unique
pA_chr20-156	ENSG00000198900.5	chr20	41124440	41124481	+	unique
pA_chr19-60	ENSG00000128626.11	chr19	38932971	38933012	+	unique
pA_chr11-26	ENSG00000085063.14	chr11	33709980	33710021	-	unique
pA_chr18-10	ENSG00000141429.13	chr18	35710944	35710985	+	unique
pA_chr2-38	ENSG00000003436.14	chr2	187466801	187466842	-	unique
pA_chr5-121	ENSG00000112996.10	chr5	44815270	44815311	+	unique
pA_chr17-51	ENSG00000013306.15	chr17	44319632	44319673	-	unique
pA_chr7-42	ENSG00000214253.8	chr7	101239617	101239658	-	unique
pA_chr2-112	ENSG00000115641.18	chr2	105360820	105360861	-	unique
pA_chr17-168	ENSG00000183010.16	chr17	81932393	81932434	-	unique
pA_chr7-52	ENSG00000090266.12	chr7	140706585	140706626	+	unique
pA_chr11-160	ENSG00000152558.14	chr11	102396333	102396374	-	unique
pA_chr5-86	ENSG00000153037.13	chr5	112867851	112867892	+	unique
pA_chr5-185	ENSG00000152377.13	chr5	136975312	136975353	-	unique
pA_chr22-71	ENSG00000100219.16	chr22	28794560	28794601	-	unique
pA_chr6-119	ENSG00000277443.2	chr6	113861752	113861793	+	unique
pA_chr7-88	ENSG00000006652.13	chr7	112476150	112476191	+	unique
pA_chr2-35	ENSG00000119812.18	chr2	33583659	33583700	-	unique
pA_chr5-130	ENSG00000154122.12	chr5	14709815	14709856	-	unique
pA_chr8-21	ENSG00000137547.8	chr8	54147846	54147887	+	unique
pA_chr12-143	ENSG00000184575.11	chr12	64448641	64448682	+	unique
pA_chr20-20	ENSG00000125971.16	chr20	34540915	34540956	+	unique
pA_chr21-10	ENSG00000142168.14	chr21	31668868	31668909	+	unique
pA_chr7-61	ENSG00000105976.14	chr7	116798340	116798381	+	unique
pA_chr12-40	ENSG00000062485.18	chr12	56271694	56271735	-	unique
pA_chr5-144	ENSG00000120727.12	chr5	139369665	139369706	+	unique
pA_chr11-126	ENSG00000076706.15	chr11	119308538	119308579	-	unique
pA_chr19-45	ENSG00000167601.11	chr19	41261720	41261761	+	unique
pA_chr1-86	ENSG00000155366.16	chr1	112701115	112701156	-	unique
pA_chr3-16	ENSG00000162244.10	chr3	51993609	51993650	-	unique
pA_chr16-42	ENSG00000141101.12	chr16	69741871	69741912	-	unique
pA_chr5-160	ENSG00000176087.14	chr5	140569051	140569092	+	unique
pA_chr11-80	ENSG00000181924.6	chr11	73872769	73872810	-	unique
pA_chr11-95	ENSG00000150779.11	chr11	112085149	112085190	-	unique
pA_chr13-14	ENSG00000125304.8	chr13	99563348	99563389	+	unique
pA_chr1-124	ENSG00000160752.14	chr1	155320611	155320652	+	unique
pA_chr6-52	ENSG00000124733.3	chr6	43012221	43012262	-	unique
pA_chr5-36	ENSG00000164346.9	chr5	74776780	74776821	+	unique
pA_chr4-27	ENSG00000109180.14	chr4	48861208	48861249	+	unique
pA_chr16-44	ENSG00000140740.10	chr16	21983305	21983346	+	unique
pA_chr17-133	ENSG00000131462.7	chr17	42615190	42615231	+	unique
pA_chr20-11	ENSG00000101057.15	chr20	43716441	43716482	+	unique
pA_chr1-202	ENSG00000132676.15	chr1	155738489	155738530	+	unique
pA_chr1-145	ENSG00000116489.12	chr1	112671495	112671536	+	unique
pA_chr5-40	ENSG00000112984.11	chr5	138187620	138187661	+	unique
pA_chr7-251	ENSG00000155561.14	chr7	135648694	135648735	+	unique
pA_chr9-20	ENSG00000136933.16	chr9	125233967	125234008	+	unique
pA_chr1-404	ENSG00000077152.9	chr1	202331661	202331702	-	unique
pA_chr7-128	ENSG00000006625.17	chr7	30496612	30496653	-	unique
pA_chr2-68	ENSG00000144580.13	chr2	218596385	218596426	+	unique
pA_chr5-63	ENSG00000153395.9	chr5	1461431	1461472	-	unique
pA_chr14-39	ENSG00000139921.12	chr14	51256009	51256050	+	unique
pA_chr5-85	ENSG00000134480.13	chr5	87394279	87394320	-	unique
pA_chr1-84	ENSG00000060688.12	chr1	31259673	31259714	-	unique
pA_chr1-239	ENSG00000117399.13	chr1	43363155	43363196	+	unique
pA_chr1-99	ENSG00000117143.13	chr1	162599795	162599836	+	unique
pA_chr3-85	ENSG00000136527.17	chr3	185917322	185917363	-	unique
pA_chrX-31	ENSG00000102054.17	chrX	16844650	16844691	-	unique
pA_chr9-64	ENSG00000086061.15	chr9	33039865	33039906	+	unique
pA_chr9-60	ENSG00000130560.8	chr9	135932971	135933012	-	unique
pA_chr2-64	ENSG00000127837.9	chr2	218264129	218264170	-	unique
pA_chr6-89	ENSG00000204388.6	chr6	31830215	31830256	+	unique
pA_chr19-125	ENSG00000167635.11	chr19	36238723	36238764	+	unique
pA_chr2-113	ENSG00000115524.15	chr2	197391977	197392018	-	unique
pA_chrX-37	ENSG00000017483.14	chrX	48458544	48458585	-	unique
pA_chr1-147	ENSG00000077549.17	chr1	19338781	19338822	-	unique
pA_chr17-85	ENSG00000174231.16	chr17	1650634	1650675	-	unique
pA_chr5-47	ENSG00000146066.2	chr5	176389725	176389766	+	unique
pA_chr3-73	ENSG00000114850.6	chr3	156543005	156543046	-	unique
pA_chr8-39	ENSG00000185803.8	chr8	144361230	144361271	+	unique
pA_chr17-100	ENSG00000108953.16	chr17	1344551	1344592	-	unique
pA_chr5-162	ENSG00000164182.10	chr5	61152976	61153017	+	unique
pA_chr8-53	ENSG00000198791.11	chr8	17229225	17229266	-	unique
pA_chr19-96	ENSG00000088247.16	chr19	6413345	6413386	-	unique
pA_chr11-256	ENSG00000150787.7	chr11	112233760	112233801	+	unique
pA_chr9-51	ENSG00000107372.12	chr9	72354459	72354500	-	unique
pA_chr9-247	ENSG00000106723.16	chr9	88478656	88478697	+	unique
pA_chr7-89	ENSG00000182158.14	chr7	137874996	137875037	-	unique
pA_chr11-41	ENSG00000175581.13	chr11	73864560	73864601	+	unique
pA_chr19-87	ENSG00000077312.8	chr19	40765340	40765381	+	unique
pA_chr17-30	ENSG00000108946.14	chr17	68532715	68532756	+	unique
pA_chr1-143	ENSG00000123080.10	chr1	50974587	50974628	+	unique
pA_chr10-30	ENSG00000170759.10	chr10	32009013	32009054	-	unique
pA_chr18-25	ENSG00000134779.14	chr18	36796068	36796109	-	unique
pA_chr19-63	ENSG00000011304.18	chr19	812176	812217	+	unique
pA_chr19-351	ENSG00000213024.11	chr19	49906819	49906860	-	unique
pA_chr1-131	ENSG00000116473.14	chr1	111713063	111713104	+	unique
pA_chr1-116	ENSG00000116750.13	chr1	193015760	193015801	-	unique
pA_chr1-220	ENSG00000175130.6	chr1	32333836	32333877	-	unique
pA_chr17-95	ENSG00000154217.14	chr17	67692870	67692911	+	unique
pA_chr5-81	ENSG00000134352.19	chr5	55936655	55936696	-	unique
pA_chr9-99	ENSG00000165119.19	chr9	83968174	83968215	-	unique
pA_chr11-115	ENSG00000109861.15	chr11	88326079	88326120	-	unique
pA_chr12-255	ENSG00000110880.10	chr12	108645124	108645165	-	unique
pA_chr15-2	ENSG00000166794.4	chr15	64155831	64155872	-	unique
pA_chr1-132	ENSG00000188643.10	chr1	153606886	153606927	-	unique
pA_chr3-22	ENSG00000113845.9	chr3	119524028	119524069	+	unique
pA_chr5-198	ENSG00000153113.23	chr5	96774629	96774670	+	unique
pA_chr16-37	ENSG00000102978.12	chr16	57471959	57472000	+	unique
pA_chr5-84	ENSG00000164172.18	chr5	53098077	53098118	-	unique
pA_chr11-55	ENSG00000085733.15	chr11	70436528	70436569	+	unique
pA_chr17-96	ENSG00000262814.7	chr17	81707483	81707524	+	unique
pA_chr7-100	ENSG00000155660.10	chr7	149003440	149003481	-	unique
pA_chr8-38	ENSG00000179632.9	chr8	144107567	144107608	+	unique
pA_chr14-53	ENSG00000155463.12	chr14	22771740	22771781	+	unique
pA_chr15-75	ENSG00000067225.17	chr15	72199032	72199073	-	unique
pA_chr3-55	ENSG00000175792.11	chr3	128080963	128081004	-	unique
pA_chr2-239	ENSG00000180398.11	chr2	46901871	46901912	-	unique
pA_chr11-25	ENSG00000109881.16	chr11	27338519	27338560	-	unique
pA_chr11-57	ENSG00000150316.11	chr11	94963340	94963381	-	unique
pA_chr12-69	ENSG00000010292.12	chr12	6531908	6531949	+	unique
pA_chr7-34	ENSG00000136240.9	chr7	6461088	6461129	-	unique
pA_chr15-26	ENSG00000157456.7	chr15	59124987	59125028	+	unique
pA_chr19-210	ENSG00000130816.14	chr19	10133349	10133390	-	unique
pA_chr22-35	ENSG00000100300.17	chr22	43163194	43163235	+	unique
pA_chr3-14	ENSG00000163882.9	chr3	184368498	184368539	+	unique
pA_chr2-22	ENSG00000150938.9	chr2	36550990	36551031	+	unique
pA_chr17-356	ENSG00000108961.13	chr17	8290045	8290086	+	unique
pA_chr2-79	ENSG00000128708.12	chr2	171983583	171983624	+	unique
pA_chr6-75	ENSG00000124767.6	chr6	38675938	38675979	-	unique
pA_chr13-19	ENSG00000139842.14	chr13	113264501	113264542	+	unique
pA_chr5-299	ENSG00000039560.13	chr5	34832565	34832606	+	unique
pA_chr5-76	ENSG00000113712.16	chr5	149495976	149496017	-	unique
pA_chr11-76	ENSG00000168040.4	chr11	70207345	70207386	+	unique
pA_chr1-789	ENSG00000160691.18	chr1	154962295	154962336	-	unique
pA_chr5-65	ENSG00000131508.15	chr5	139626818	139626859	+	unique
pA_chr6-120	ENSG00000198818.9	chr6	166320030	166320071	-	unique
pA_chr9-59	ENSG00000130558.19	chr9	135098059	135098100	+	unique
pA_chr20-21	ENSG00000101158.13	chr20	58995077	58995118	+	unique
pA_chr11-234	ENSG00000110717.11	chr11	68036603	68036644	+	unique
pA_chr1-333	ENSG00000183431.11	chr1	37956976	37957017	-	unique
pA_chr5-70	ENSG00000049656.13	chr5	1317755	1317796	-	unique
pA_chr7-66	ENSG00000105821.14	chr7	103312515	103312556	-	unique
pA_chr3-52	ENSG00000114738.10	chr3	50649238	50649279	+	unique
pA_chr11-235	ENSG00000177156.10	chr11	764974	765015	+	unique
pA_chr13-22	ENSG00000065150.18	chr13	98023020	98023061	+	unique
pA_chr5-54	ENSG00000174695.9	chr5	83056301	83056342	-	unique
pA_chr11-93	ENSG00000089597.16	chr11	62624829	62624870	-	unique
pA_chr22-69	ENSG00000180957.17	chr22	27851668	27851709	-	unique
pA_chr7-40	ENSG00000156928.4	chr7	23309523	23309564	+	unique
pA_chr8-9	ENSG00000261236.6	chr8	144262105	144262146	-	unique
pA_chr2-54	ENSG00000115963.13	chr2	150468207	150468248	-	unique
pA_chr3-150	ENSG00000160124.9	chr3	122359598	122359639	-	unique
pA_chr5-57	ENSG00000164292.12	chr5	95796317	95796358	+	unique
pA_chr11-146	ENSG00000149089.12	chr11	34882368	34882409	-	unique
pA_chr2-52	ENSG00000115368.9	chr2	189475506	189475547	+	unique
pA_chr5-150	ENSG00000171530.13	chr5	77691219	77691260	-	unique
pA_chr7-127	ENSG00000136240.9	chr7	6461753	6461794	-	unique
pA_chr17-167	ENSG00000189159.15	chr17	75135247	75135288	-	unique
pA_chr1-80	ENSG00000162607.12	chr1	62451696	62451737	+	unique
pA_chr7-115	ENSG00000242265.5	chr7	94669642	94669683	+	unique
pA_chrX-15	ENSG00000147224.10	chrX	107650987	107651028	+	unique
pA_chr15-71	ENSG00000104131.12	chr15	44562042	44562083	+	unique
pA_chr12-93	ENSG00000139180.10	chr12	4687187	4687228	+	unique
pA_chr12-23	ENSG00000166598.13	chr12	103947874	103947915	+	unique
pA_chr9-182	ENSG00000136819.15	chr9	129827291	129827332	-	unique
pA_chr11-180	ENSG00000073921.17	chr11	85957679	85957720	-	unique
pA_chr11-53	ENSG00000166741.7	chr11	114312471	114312512	+	unique
pA_chr12-86	ENSG00000111321.10	chr12	6391523	6391564	+	unique
pA_chr14-41	ENSG00000156411.9	chr14	103912294	103912335	-	unique
pA_chr20-59	ENSG00000125821.11	chr20	18763852	18763893	+	unique
pA_chr3-101	ENSG00000136527.17	chr3	185916740	185916781	-	unique
pA_chr5-111	ENSG00000113141.16	chr5	140662420	140662461	+	unique
pA_chr1-106	ENSG00000189266.11	chr1	23963406	23963447	+	unique
pA_chr11-49	ENSG00000133318.13	chr11	63759834	63759875	+	unique
pA_chr17-177	ENSG00000161547.15	chr17	76734848	76734889	-	unique
pA_chr1-165	ENSG00000117505.12	chr1	93362552	93362593	+	unique
pA_chr10-66	ENSG00000151923.17	chr10	119575401	119575442	-	unique
pA_chr22-36	ENSG00000131100.12	chr22	17592166	17592207	-	unique
pA_chr8-16	ENSG00000179041.3	chr8	66430687	66430728	+	unique
pA_chr12-110	ENSG00000089159.16	chr12	120210447	120210488	-	unique
pA_chr6-400	ENSG00000123545.5	chr6	96891008	96891049	-	unique
pA_chr22-94	ENSG00000100304.12	chr22	43166622	43166663	-	unique
pA_chr5-176	ENSG00000178913.7	chr5	141318490	141318531	-	unique
pA_chr9-74	ENSG00000044574.7	chr9	125236237	125236278	-	unique
pA_chr16-59	ENSG00000161980.5	chr16	47057	47098	-	unique
pA_chr19-115	ENSG00000160014.16	chr19	46610737	46610778	+	unique
pA_chr19-70	ENSG00000130726.11	chr19	58550689	58550730	+	unique
pA_chr16-101	ENSG00000167962.13	chr16	1997656	1997697	-	unique
pA_chr7-14	ENSG00000005075.15	chr7	102473451	102473492	-	unique
pA_chr9-89	ENSG00000148337.20	chr9	128166062	128166103	-	unique
pA_chr10-9	ENSG00000127884.4	chr10	133362474	133362515	-	unique
pA_chr22-40	ENSG00000100347.14	chr22	43996487	43996528	+	unique
pA_chr3-65	ENSG00000164091.11	chr3	52254434	52254475	-	unique
pA_chr7-50	ENSG00000106603.17	chr7	43639260	43639301	-	unique
pA_chr1-57	ENSG00000137955.15	chr1	75794777	75794818	+	unique
pA_chr6-26	ENSG00000112081.16	chr6	36602877	36602918	+	unique
pA_chr8-11	ENSG00000155189.11	chr8	6759609	6759650	+	unique
pA_chr20-77	ENSG00000101421.3	chr20	33854319	33854360	+	unique
pA_chr20-44	ENSG00000101447.13	chr20	38953013	38953054	+	unique
pA_chr13-10	ENSG00000198176.12	chr13	113586128	113586169	+	unique
pA_chr12-39	ENSG00000166986.13	chr12	57516607	57516648	+	unique
pA_chr17-226	ENSG00000167900.11	chr17	78174080	78174121	-	unique
pA_chr1-321	ENSG00000084073.8	chr1	40294140	40294181	+	unique
pA_chr4-46	ENSG00000128050.8	chr4	56459635	56459676	+	unique
pA_chr9-25	ENSG00000148303.16	chr9	133349428	133349469	+	unique
pA_chr3-141	ENSG00000114354.13	chr3	100748917	100748958	+	unique
pA_chr3-12	ENSG00000058262.9	chr3	128071637	128071678	+	unique
pA_chr10-153	ENSG00000108010.11	chr10	130179547	130179588	+	unique
pA_chr11-32	ENSG00000110651.11	chr11	2397363	2397404	+	unique
pA_chr3-18	ENSG00000152601.17	chr3	152465727	152465768	+	unique
pA_chr7-198	ENSG00000106484.14	chr7	130506247	130506288	+	unique
pA_chr5-87	ENSG00000113580.14	chr5	143277936	143277977	-	unique
pA_chr18-20	ENSG00000134440.11	chr18	57600648	57600689	-	unique
pA_chr19-179	ENSG00000179262.9	chr19	12953595	12953636	+	unique
pA_chrX-67	ENSG00000126890.13	chrX	154651975	154652016	-	unique
pA_chr15-60	ENSG00000090487.10	chr15	64963024	64963065	-	unique
pA_chr15-68	ENSG00000074696.12	chr15	65578314	65578355	+	unique
pA_chr2-134	ENSG00000079785.14	chr2	15631061	15631102	+	unique
pA_chr9-46	ENSG00000107371.12	chr9	37780457	37780498	-	unique
pA_chr3-32	ENSG00000010256.10	chr3	48598998	48599039	-	unique
pA_chr13-48	ENSG00000186184.16	chr13	27623402	27623443	+	unique
pA_chr6-46	ENSG00000273542.1	chr6	27831177	27831218	-	unique
pA_chr5-146	ENSG00000040275.16	chr5	169604723	169604764	+	unique
pA_chrX-17	ENSG00000180879.13	chrX	153798463	153798504	+	unique
pA_chr1-63	ENSG00000143179.13	chr1	165908073	165908114	+	unique
pA_chr7-132	ENSG00000136240.9	chr7	6462737	6462778	-	unique
pA_chr11-83	ENSG00000087053.18	chr11	95834090	95834131	-	unique
pA_chr12-119	ENSG00000110801.13	chr12	121916589	121916630	+	unique
pA_chr17-111	ENSG00000141367.11	chr17	59694738	59694779	+	unique
pA_chr1-623	ENSG00000054116.11	chr1	36136573	36136614	-	unique
pA_chr1-281	ENSG00000116729.13	chr1	68125494	68125535	-	unique
pA_chr4-40	ENSG00000138777.19	chr4	105369562	105369603	-	unique
pA_chr7-111	ENSG00000106635.7	chr7	73536358	73536399	-	unique
pA_chr11-62	ENSG00000159063.12	chr11	78100939	78100980	-	unique
pA_chr19-142	ENSG00000099624.7	chr19	1244784	1244825	+	unique
pA_chr2-71	ENSG00000115380.19	chr2	55866604	55866645	-	unique
pA_chr3-90	ENSG00000114867.20	chr3	184335307	184335348	+	unique
pA_chr12-305	ENSG00000139579.12	chr12	56229811	56229852	+	unique
pA_chr14-37	ENSG00000100519.11	chr14	52727948	52727989	+	unique
pA_chr17-141	ENSG00000278845.4	chr17	38323169	38323210	+	unique
pA_chr1-422	ENSG00000143314.12	chr1	156737298	156737339	-	unique
pA_chr10-106	ENSG00000166136.15	chr10	100523733	100523774	-	unique
pA_chr7-156	ENSG00000196636.7	chr7	97181719	97181760	+	unique
pA_chr16-129	ENSG00000133393.12	chr16	15865716	15865757	-	unique
pA_chr9-165	ENSG00000135047.14	chr9	87731347	87731388	+	unique
pA_chr12-102	ENSG00000136045.11	chr12	107712427	107712468	+	unique
pA_chr10-88	ENSG00000122873.11	chr10	58287936	58287977	+	unique
pA_chrX-13	ENSG00000131828.13	chrX	19359798	19359839	+	unique
pA_chr1-460	ENSG00000135829.16	chr1	182887704	182887745	+	unique
pA_chr5-213	ENSG00000113048.16	chr5	72219527	72219568	-	unique
pA_chr12-165	ENSG00000135486.17	chr12	54285208	54285249	+	unique
pA_chr17-195	ENSG00000170291.14	chr17	7259892	7259933	+	unique
pA_chr15-9	ENSG00000167004.12	chr15	43771500	43771541	+	unique
pA_chr2-76	ENSG00000196504.15	chr2	152655329	152655370	-	unique
pA_chr22-27	ENSG00000093010.12	chr22	19968972	19969013	+	unique
pA_chr3-138	ENSG00000168273.7	chr3	52540484	52540525	+	unique
pA_chr7-177	ENSG00000122565.18	chr7	26212446	26212487	+	unique
pA_chr10-17	ENSG00000165678.20	chr10	84152505	84152546	+	unique
pA_chr1-192	ENSG00000023572.8	chr1	193096461	193096502	-	unique
pA_chr7-28	ENSG00000128534.7	chr7	118192125	118192166	+	unique
pA_chr16-132	ENSG00000159593.14	chr16	66802878	66802919	-	unique
pA_chr17-89	ENSG00000132383.11	chr17	1898026	1898067	+	unique
pA_chr2-61	ENSG00000171848.13	chr2	10131369	10131410	+	unique
pA_chrX-85	ENSG00000102119.10	chrX	154381477	154381518	+	unique
pA_chr19-127	ENSG00000170892.10	chr19	54193621	54193662	+	unique
pA_chr14-32	ENSG00000100442.10	chr14	45115900	45115941	-	unique
pA_chr4-139	ENSG00000071127.16	chr4	10074337	10074378	-	unique
pA_chr5-290	ENSG00000177879.14	chr5	115914037	115914078	+	unique
pA_chr2-90	ENSG00000143870.12	chr2	10783859	10783900	-	unique
pA_chr1-110	ENSG00000009307.15	chr1	114717982	114718023	-	unique
pA_chr10-61	ENSG00000099194.5	chr10	100363565	100363606	+	unique
pA_chr5-204	ENSG00000113282.13	chr5	157786289	157786330	-	unique
pA_chr17-52	ENSG00000108883.12	chr17	44850927	44850968	-	unique
pA_chr19-89	ENSG00000013275.7	chr19	39981393	39981434	+	unique
pA_chr3-31	ENSG00000214706.10	chr3	50287748	50287789	-	unique
pA_chr10-75	ENSG00000172586.7	chr10	73783328	73783369	+	unique
pA_chr17-114	ENSG00000170043.11	chr17	7930347	7930388	-	unique
pA_chr3-97	ENSG00000172053.16	chr3	49095934	49095975	-	unique
pA_chr11-67	ENSG00000204922.4	chr11	62672333	62672374	+	unique
pA_chr11-28	ENSG00000171204.12	chr11	85636467	85636508	+	unique
pA_chr9-147	ENSG00000107164.15	chr9	130638303	130638344	+	unique
pA_chr11-72	ENSG00000166337.9	chr11	6610829	6610870	-	unique
pA_chr15-7	ENSG00000185787.14	chr15	78897202	78897243	+	unique
pA_chr18-21	ENSG00000134049.4	chr18	47156025	47156066	-	unique
pA_chr2-34	ENSG00000173692.12	chr2	231172706	231172747	+	unique
pA_chr6-69	ENSG00000092820.17	chr6	158765744	158765785	-	unique
pA_chr2-41	ENSG00000114956.19	chr2	73958908	73958949	+	unique
pA_chr11-21	ENSG00000211450.9	chr11	57743000	57743041	+	unique
pA_chr16-85	ENSG00000171208.9	chr16	47082825	47082866	-	unique
pA_chr1-94	ENSG00000213281.4	chr1	114704469	114704510	-	unique
pA_chr1-360	ENSG00000116857.16	chr1	201134781	201134822	-	unique
pA_chr17-73	ENSG00000172301.10	chr17	31851869	31851910	-	unique
pA_chr1-142	ENSG00000181817.5	chr1	36393424	36393465	-	unique
pA_chr17-43	ENSG00000108829.9	chr17	50382654	50382695	-	unique
pA_chr19-105	ENSG00000105254.11	chr19	36125897	36125938	+	unique
pA_chr10-38	ENSG00000122952.16	chr10	56357439	56357480	-	unique
pA_chr9-80	ENSG00000165283.15	chr9	35099891	35099932	-	unique
pA_chr14-46	ENSG00000100462.15	chr14	22920528	22920569	-	unique
pA_chr22-115	ENSG00000100380.13	chr22	40826136	40826177	-	unique
pA_chr3-70	ENSG00000008324.10	chr3	42594947	42594988	+	unique
pA_chr11-113	ENSG00000166902.4	chr11	59806136	59806177	-	unique
pA_chr4-34	ENSG00000047315.14	chr4	57031114	57031155	+	unique
pA_chr6-96	ENSG00000137288.9	chr6	33697568	33697609	-	unique
pA_chr8-50	ENSG00000104695.12	chr8	30785620	30785661	-	unique
pA_chr19-240	ENSG00000073008.14	chr19	44663537	44663578	+	unique
pA_chr21-24	ENSG00000160208.12	chr21	43696025	43696066	+	unique
pA_chr1-148	ENSG00000132768.13	chr1	43973324	43973365	+	unique
pA_chr8-37	ENSG00000172172.7	chr8	120395849	120395890	-	unique
pA_chr4-113	ENSG00000109606.12	chr4	24527472	24527513	-	unique
pA_chr11-142	ENSG00000204370.8	chr11	112095741	112095782	+	unique
pA_chr8-144	ENSG00000147687.17	chr8	124488507	124488548	-	unique
pA_chr11-197	ENSG00000133316.15	chr11	62832910	62832951	-	unique
pA_chr12-273	ENSG00000170515.13	chr12	56113866	56113907	+	unique
pA_chr4-188	ENSG00000109534.16	chr4	109824694	109824735	+	unique
pA_chr5-170	ENSG00000173545.4	chr5	16451519	16451560	-	unique
pA_chr3-286	ENSG00000144895.11	chr3	150584203	150584244	+	unique
pA_chr11-221	ENSG00000162191.13	chr11	62676510	62676551	-	unique
pA_chr16-67	ENSG00000103502.13	chr16	29858358	29858399	-	unique
pA_chr1-265	ENSG00000142871.16	chr1	85583657	85583698	+	unique
pA_chr2-191	ENSG00000003436.14	chr2	187464236	187464277	-	unique
pA_chr2-199	ENSG00000116062.14	chr2	47806908	47806949	+	unique
pA_chr12-266	ENSG00000186298.11	chr12	110719805	110719846	-	unique
pA_chr14-90	ENSG00000182979.17	chr14	105470670	105470711	+	unique
pA_chr17-150	ENSG00000167085.11	chr17	49404063	49404104	-	unique
pA_chr1-187	ENSG00000134697.12	chr1	37566827	37566868	-	unique
pA_chr11-52	ENSG00000166012.15	chr11	93730520	93730561	-	unique
pA_chr10-83	ENSG00000119953.12	chr10	110293041	110293082	-	unique
pA_chr11-84	ENSG00000137692.11	chr11	103062083	103062124	-	unique
pA_chrX-25	ENSG00000101911.12	chrX	12824179	12824220	+	unique
pA_chr12-44	ENSG00000089693.10	chr12	6747997	6748038	-	unique
pA_chr12-51	ENSG00000123374.10	chr12	55972730	55972771	+	unique
pA_chr4-93	ENSG00000145386.9	chr4	121816440	121816481	-	unique
pA_chr9-119	ENSG00000136938.8	chr9	98015908	98015949	+	unique
pA_chr9-78	ENSG00000188986.5	chr9	137273497	137273538	+	unique
pA_chr7-125	ENSG00000064419.13	chr7	128954194	128954235	-	unique
pA_chr1-294	ENSG00000116350.16	chr1	29147745	29147786	-	unique
pA_chr4-43	ENSG00000145337.4	chr4	88520994	88521035	-	unique
pA_chr5-173	ENSG00000188725.7	chr5	61158603	61158644	-	unique
pA_chr16-43	ENSG00000126602.10	chr16	3658039	3658080	-	unique
pA_chr20-66	ENSG00000124225.15	chr20	57648396	57648437	-	unique
pA_chrX-144	ENSG00000068366.19	chrX	109641333	109641374	-	unique
pA_chr2-105	ENSG00000163170.11	chr2	74135416	74135457	-	unique
pA_chr19-130	ENSG00000141858.11	chr19	14087846	14087887	-	unique
pA_chr16-39	ENSG00000095906.16	chr16	1789142	1789183	+	unique
pA_chr2-80	ENSG00000061676.14	chr2	182924882	182924923	-	unique
pA_chr9-68	ENSG00000165264.10	chr9	32553755	32553796	-	unique
pA_chr22-6	ENSG00000100418.7	chr22	41600889	41600930	-	unique
pA_chr1-479	ENSG00000081870.11	chr1	53921557	53921598	-	unique
pA_chr1-286	ENSG00000143384.12	chr1	150574554	150574595	-	unique
pA_chr20-92	ENSG00000064601.16	chr20	45898770	45898811	+	unique
pA_chr5-55	ENSG00000113643.8	chr5	168519253	168519294	+	unique
pA_chr19-21	ENSG00000105698.15	chr19	35279765	35279806	+	unique
pA_chr2-91	ENSG00000143947.12	chr2	55235562	55235603	+	unique
pA_chr6-143	ENSG00000050393.11	chr6	13790791	13790832	-	unique
pA_chr19-22	ENSG00000160877.5	chr19	13141095	13141136	+	unique
pA_chr4-32	ENSG00000002549.12	chr4	17607924	17607965	+	unique
pA_chr5-184	ENSG00000119048.7	chr5	134390738	134390779	+	unique
pA_chr17-290	ENSG00000181222.15	chr17	7514568	7514609	+	unique
pA_chr3-40	ENSG00000178057.14	chr3	49023238	49023279	+	unique
pA_chr20-53	ENSG00000132640.14	chr20	11926552	11926593	+	unique
pA_chr3-48	ENSG00000170275.14	chr3	33143130	33143171	+	unique
pA_chr17-32	ENSG00000213246.6	chr17	58345918	58345959	-	unique
pA_chr5-110	ENSG00000152700.13	chr5	134606425	134606466	-	unique
pA_chr6-189	ENSG00000120256.9	chr6	149818784	149818825	-	unique
pA_chr17-90	ENSG00000166582.9	chr17	16342529	16342570	-	unique
pA_chr5-75	ENSG00000113368.11	chr5	126836970	126837011	+	unique
pA_chr1-483	ENSG00000081721.11	chr1	161757111	161757152	+	unique
pA_chr3-45	ENSG00000170142.11	chr3	23891272	23891313	+	unique
pA_chr19-36	ENSG00000167468.16	chr19	1106732	1106773	+	unique
pA_chr20-38	ENSG00000101150.17	chr20	63891493	63891534	+	unique
pA_chr1-146	ENSG00000117362.12	chr1	150265407	150265448	-	unique
pA_chr1-133	ENSG00000122218.14	chr1	160289272	160289313	-	unique
pA_chr11-23	ENSG00000109854.13	chr11	20383738	20383779	+	unique
pA_chr1-876	ENSG00000198492.15	chr1	28769734	28769775	+	unique
pA_chr3-77	ENSG00000072274.12	chr3	196049291	196049332	-	unique
pA_chr12-55	ENSG00000111665.11	chr12	6848831	6848872	-	unique
pA_chr1-117	ENSG00000143774.16	chr1	228148908	228148949	+	unique
pA_chr4-70	ENSG00000164096.12	chr4	119298492	119298533	-	unique
pA_chr13-62	ENSG00000123179.13	chr13	49660725	49660766	-	unique
pA_chr19-123	ENSG00000130303.12	chr19	17402942	17402983	-	unique
pA_chr3-83	ENSG00000120742.10	chr3	150544219	150544260	-	unique
pA_chr20-161	ENSG00000101361.15	chr20	2655156	2655197	+	unique
pA_chr13-12	ENSG00000198176.12	chr13	113641425	113641466	+	unique
pA_chr10-210	ENSG00000165637.13	chr10	75231407	75231448	+	unique
pA_chr13-20	ENSG00000150459.12	chr13	21147557	21147598	+	unique
pA_chr17-45	ENSG00000159210.9	chr17	48930378	48930419	-	unique
pA_chr22-48	ENSG00000100418.7	chr22	41598032	41598073	-	unique
pA_chr7-51	ENSG00000106636.7	chr7	44214249	44214290	+	unique
pA_chr16-51	ENSG00000166595.11	chr16	66932063	66932104	-	unique
pA_chr17-102	ENSG00000073584.18	chr17	40628730	40628771	-	unique
pA_chrX-63	ENSG00000077721.15	chrX	119584377	119584418	+	unique
pA_chr13-15	ENSG00000120694.19	chr13	31136625	31136666	-	unique
pA_chr16-57	ENSG00000135698.9	chr16	82148159	82148200	-	unique
pA_chr19-214	ENSG00000142546.13	chr19	49555725	49555766	-	unique
pA_chr5-190	ENSG00000083720.12	chr5	41730067	41730108	-	unique
pA_chr8-41	ENSG00000169499.14	chr8	38973864	38973905	+	unique
pA_chr19-100	ENSG00000105379.9	chr19	51345165	51345206	-	unique
pA_chr1-218	ENSG00000142669.14	chr1	26281476	26281517	+	unique
pA_chr6-130	ENSG00000198721.12	chr6	4115696	4115737	-	unique
pA_chr6-371	ENSG00000096092.5	chr6	52686541	52686582	+	unique
pA_chr19-39	ENSG00000123159.15	chr19	14477761	14477802	-	unique
pA_chr2-77	ENSG00000170144.19	chr2	177220489	177220530	+	unique
pA_chr10-95	ENSG00000079332.14	chr10	70150206	70150247	-	unique
pA_chr11-164	ENSG00000205339.9	chr11	9446180	9446221	+	unique
pA_chr19-185	ENSG00000099622.13	chr19	1273125	1273166	+	unique
pA_chr1-97	ENSG00000078808.16	chr1	1216923	1216964	-	unique
pA_chr7-95	ENSG00000136193.16	chr7	29920111	29920152	-	unique
pA_chr5-115	ENSG00000171720.9	chr5	141620873	141620914	-	unique
pA_chr6-49	ENSG00000204463.12	chr6	31639035	31639076	-	unique
pA_chr1-69	ENSG00000143183.16	chr1	165727552	165727593	-	unique
pA_chr2-83	ENSG00000176407.17	chr2	85053723	85053764	+	unique
pA_chr15-51	ENSG00000128739.21	chr15	24978538	24978579	+	unique
pA_chr1-254	ENSG00000143549.19	chr1	154156357	154156398	-	unique
pA_chr11-102	ENSG00000149196.15	chr11	86345617	86345658	+	unique
pA_chrX-54	ENSG00000126945.8	chrX	101414086	101414127	+	unique
pA_chr1-101	ENSG00000134684.10	chr1	32775229	32775270	-	unique
pA_chr5-250	ENSG00000113312.10	chr5	160065499	160065540	+	unique
pA_chr9-112	ENSG00000095319.14	chr9	129007051	129007092	+	unique
pA_chr15-62	ENSG00000131871.14	chr15	101272190	101272231	-	unique
pA_chr20-75	ENSG00000171867.16	chr20	4701542	4701583	+	unique
pA_chr1-113	ENSG00000117133.10	chr1	84497631	84497672	+	unique
pA_chr1-121	ENSG00000160767.20	chr1	155247212	155247253	-	unique
pA_chr2-122	ENSG00000186522.14	chr2	109542988	109543029	-	unique
pA_chr20-30	ENSG00000118705.16	chr20	37241575	37241616	+	unique
pA_chr16-72	ENSG00000149923.13	chr16	30085327	30085368	+	unique
pA_chr16-108	ENSG00000103005.11	chr16	58021575	58021616	+	unique
pA_chr7-139	ENSG00000146834.13	chr7	100434069	100434110	+	unique
pA_chr6-117	ENSG00000135316.17	chr6	85612571	85612612	-	unique
pA_chr16-34	ENSG00000132603.13	chr16	69343057	69343098	+	unique
pA_chr2-111	ENSG00000168883.19	chr2	85649233	85649274	+	unique
pA_chr3-129	ENSG00000121579.12	chr3	113718983	113719024	-	unique
pA_chr12-210	ENSG00000089248.6	chr12	112022945	112022986	+	unique
pA_chrX-117	ENSG00000185222.7	chrX	103358415	103358456	+	unique
pA_chr19-232	ENSG00000105058.11	chr19	16192000	16192041	+	unique
pA_chr19-93	ENSG00000006016.10	chr19	18593234	18593275	-	unique
pA_chr2-304	ENSG00000115866.10	chr2	135906676	135906717	-	unique
pA_chr12-180	ENSG00000089053.12	chr12	121308351	121308392	-	unique
pA_chr22-9	ENSG00000182944.17	chr22	29300473	29300514	+	unique
pA_chr12-204	ENSG00000170515.13	chr12	56113107	56113148	+	unique
pA_chr14-66	ENSG00000198805.11	chr14	20477047	20477088	+	unique
pA_chr2-128	ENSG00000114999.7	chr2	112532358	112532399	+	unique
pA_chr8-75	ENSG00000147669.10	chr8	100153956	100153997	+	unique
pA_chr12-33	ENSG00000139644.12	chr12	49762962	49763003	+	unique
pA_chr12-114	ENSG00000133773.11	chr12	82352837	82352878	-	unique
pA_chr14-63	ENSG00000073712.14	chr14	52857272	52857313	-	unique
pA_chr1-109	ENSG00000168710.17	chr1	110023696	110023737	+	unique
pA_chr2-529	ENSG00000084733.10	chr2	26137372	26137413	+	unique
pA_chr19-84	ENSG00000123146.19	chr19	14408679	14408720	+	unique
pA_chr7-30	ENSG00000106399.11	chr7	7636929	7636970	-	unique
pA_chr19-14	ENSG00000142002.16	chr19	4724640	4724681	-	unique
pA_chr1-643	ENSG00000198860.11	chr1	184074170	184074211	+	unique
pA_chr1-216	ENSG00000196352.14	chr1	207360919	207360960	+	unique
pA_chr1-96	ENSG00000162910.18	chr1	228106687	228106728	-	unique
pA_chr2-204	ENSG00000168894.9	chr2	85597534	85597575	+	unique
pA_chr2-352	ENSG00000135930.13	chr2	232569173	232569214	+	unique
pA_chr4-89	ENSG00000138757.14	chr4	75642781	75642822	-	unique
pA_chr17-162	ENSG00000108639.7	chr17	78172678	78172719	+	unique
pA_chr19-82	ENSG00000228300.13	chr19	1279194	1279235	+	unique
pA_chr19-66	ENSG00000105364.13	chr19	10260014	10260055	+	unique
pA_chr5-105	ENSG00000169223.14	chr5	177331562	177331603	-	unique
pA_chr13-55	ENSG00000136156.12	chr13	48261344	48261385	+	unique
pA_chr17-122	ENSG00000108788.11	chr17	42572653	42572694	+	unique
pA_chr20-17	ENSG00000088325.15	chr20	31801754	31801795	+	unique
pA_chrX-24	ENSG00000102030.15	chrX	153929927	153929968	-	unique
pA_chr16-115	ENSG00000103194.15	chr16	84779878	84779919	+	unique
pA_chr20-60	ENSG00000173418.11	chr20	20033578	20033619	+	unique
pA_chr1-249	ENSG00000126088.13	chr1	45015532	45015573	+	unique
pA_chr3-247	ENSG00000247596.8	chr3	52228609	52228650	-	unique
pA_chr6-449	ENSG00000204392.10	chr6	31797393	31797434	-	unique
pA_chr11-104	ENSG00000177697.17	chr11	838787	838828	+	unique
pA_chr6-57	ENSG00000111845.4	chr6	10709711	10709752	+	unique
pA_chr10-154	ENSG00000134453.15	chr10	6115709	6115750	+	unique
pA_chr17-202	ENSG00000169689.14	chr17	82018698	82018739	-	unique
pA_chr1-54	ENSG00000162551.13	chr1	21578358	21578399	+	unique
pA_chr1-104	ENSG00000065135.9	chr1	109593479	109593520	+	unique
pA_chr7-102	ENSG00000146729.9	chr7	56000133	56000174	+	unique
pA_chr11-129	ENSG00000172757.12	chr11	65854936	65854977	-	unique
pA_chr16-80	ENSG00000141076.17	chr16	69168981	69169022	+	unique
pA_chr2-123	ENSG00000155438.11	chr2	121727046	121727087	-	unique
pA_chr2-129	ENSG00000211460.11	chr2	121767247	121767288	+	unique
pA_chr6-114	ENSG00000146278.10	chr6	89084789	89084830	+	unique
pA_chr19-193	ENSG00000142541.16	chr19	49490921	49490962	+	unique
pA_chr1-227	ENSG00000117394.19	chr1	42926170	42926211	-	unique
pA_chr1-85	ENSG00000197982.13	chr1	37809409	37809450	+	unique
pA_chr11-114	ENSG00000149480.6	chr11	62593209	62593250	-	unique
pA_chr16-261	ENSG00000140859.15	chr16	57758214	57758255	-	unique
pA_chr19-182	ENSG00000126254.11	chr19	35637640	35637681	+	unique
pA_chr6-58	ENSG00000112759.16	chr6	44234093	44234134	+	unique
pA_chr17-14	ENSG00000129255.15	chr17	7588148	7588189	+	unique
pA_chr2-78	ENSG00000198522.13	chr2	27650806	27650847	+	unique
pA_chr12-201	ENSG00000003056.7	chr12	8940377	8940418	-	unique
pA_chr17-138	ENSG00000005100.12	chr17	5440927	5440968	-	unique
pA_chr2-121	ENSG00000180398.11	chr2	46905236	46905277	-	unique
pA_chr2-72	ENSG00000144034.14	chr2	73729890	73729931	-	unique
pA_chr19-324	ENSG00000178980.14	chr19	47784638	47784679	+	unique
pA_chr22-61	ENSG00000100345.20	chr22	36281636	36281677	-	unique
pA_chr1-103	ENSG00000162368.13	chr1	47377733	47377774	+	unique
pA_chr3-181	ENSG00000171148.13	chr3	9779969	9780010	-	unique
pA_chr13-52	ENSG00000132963.7	chr13	28678456	28678497	+	unique
pA_chr10-78	ENSG00000156515.21	chr10	69401836	69401877	+	unique
pA_chr12-109	ENSG00000075188.8	chr12	102074187	102074228	-	unique
pA_chr19-77	ENSG00000130309.10	chr19	17583112	17583153	+	unique
pA_chr6-131	ENSG00000124783.12	chr6	7289549	7289590	-	unique
pA_chr6-149	ENSG00000204356.12	chr6	31952225	31952266	-	unique
pA_chr3-179	ENSG00000152952.11	chr3	146069441	146069482	-	unique
pA_chr6-90	ENSG00000112473.17	chr6	33204391	33204432	+	unique
pA_chr10-44	ENSG00000213551.4	chr10	73242828	73242869	-	unique
pA_chr11-159	ENSG00000171204.12	chr11	85636376	85636417	+	unique
pA_chr15-78	ENSG00000185043.10	chr15	90230246	90230287	-	unique
pA_chr1-122	ENSG00000116161.17	chr1	175010338	175010379	+	unique
pA_chr11-275	ENSG00000074266.18	chr11	86278695	86278736	+	unique
pA_chr17-164	ENSG00000141232.4	chr17	50862218	50862259	-	unique
pA_chr16-171	ENSG00000102900.12	chr16	56844725	56844766	+	unique
pA_chr2-173	ENSG00000088205.12	chr2	117832338	117832379	+	unique
pA_chr15-43	ENSG00000128944.13	chr15	40394209	40394250	+	unique
pA_chr12-103	ENSG00000172572.6	chr12	20684048	20684089	+	unique
pA_chr12-127	ENSG00000170855.3	chr12	120443966	120444007	-	unique
pA_chr17-77	ENSG00000167193.7	chr17	1420707	1420748	-	unique
pA_chr3-29	ENSG00000144848.10	chr3	112532529	112532570	-	unique
pA_chr2-147	ENSG00000138442.9	chr2	202880601	202880642	-	unique
pA_chr4-181	ENSG00000145247.11	chr4	48885388	48885429	-	unique
pA_chr7-133	ENSG00000006451.7	chr7	39708075	39708116	+	unique
pA_chr9-79	ENSG00000080608.9	chr9	2804165	2804206	-	unique
pA_chr20-118	ENSG00000131051.21	chr20	35704336	35704377	-	unique
pA_chr3-270	ENSG00000205981.6	chr3	180984536	180984577	-	unique
pA_chr4-102	ENSG00000109133.12	chr4	41954412	41954453	+	unique
pA_chr6-102	ENSG00000272047.1	chr6	158192385	158192426	+	unique
pA_chr9-66	ENSG00000137106.17	chr9	37436946	37436987	+	unique
pA_chr11-12	ENSG00000175550.7	chr11	65921503	65921544	+	unique
pA_chr4-47	ENSG00000138772.12	chr4	78610394	78610435	+	unique
pA_chr4-29	ENSG00000164167.9	chr4	146189879	146189920	+	unique
pA_chr19-20	ENSG00000064666.14	chr19	1039021	1039062	+	unique
pA_chr1-238	ENSG00000116871.15	chr1	36180792	36180833	+	unique
pA_chr1-125	ENSG00000230124.6	chr1	180288229	180288270	-	unique
pA_chr6-63	ENSG00000158373.8	chr6	26158569	26158610	+	unique
pA_chr6-136	ENSG00000112208.11	chr6	57184881	57184922	+	unique
pA_chr12-172	ENSG00000111726.12	chr12	22065623	22065664	+	unique
pA_chr20-34	ENSG00000025772.7	chr20	44942227	44942268	-	unique
pA_chr1-355	ENSG00000116791.13	chr1	74705482	74705523	-	unique
pA_chr6-121	ENSG00000111802.13	chr6	24649979	24650020	-	unique
pA_chr12-151	ENSG00000139637.13	chr12	53307134	53307175	+	unique
pA_chr1-256	ENSG00000116711.9	chr1	186988937	186988978	+	unique
pA_chr7-69	ENSG00000006634.7	chr7	87908317	87908358	+	unique
pA_chr8-78	ENSG00000154582.16	chr8	73946391	73946432	-	unique
pA_chr15-22	ENSG00000103591.12	chr15	67201672	67201713	-	unique
pA_chr16-127	ENSG00000167969.12	chr16	2239883	2239924	-	unique
pA_chr3-44	ENSG00000259956.1	chr3	51394347	51394388	+	unique
pA_chr4-30	ENSG00000071127.16	chr4	10074479	10074520	-	unique
pA_chr7-107	ENSG00000243317.7	chr7	135674408	135674449	+	unique
pA_chr9-106	ENSG00000119318.12	chr9	107330402	107330443	+	unique
pA_chr1-560	ENSG00000213190.3	chr1	151068448	151068489	+	unique
pA_chr6-178	ENSG00000096063.15	chr6	35833032	35833073	-	unique
pA_chr10-34	ENSG00000182180.13	chr10	73250740	73250781	-	unique
pA_chr11-106	ENSG00000173511.9	chr11	64238743	64238784	+	unique
pA_chr2-307	ENSG00000138381.9	chr2	189670773	189670814	+	unique
pA_chr3-42	ENSG00000075914.12	chr3	45011430	45011471	+	unique
pA_chr5-64	ENSG00000134057.14	chr5	69177660	69177701	+	unique
pA_chr14-22	ENSG00000092201.9	chr14	21351485	21351526	-	unique
pA_chr15-27	ENSG00000169032.9	chr15	66491487	66491528	+	unique
pA_chr11-254	ENSG00000181924.6	chr11	73872675	73872716	-	unique
pA_chr5-106	ENSG00000164237.8	chr5	10279287	10279328	-	unique
pA_chr5-80	ENSG00000168685.14	chr5	35879556	35879597	+	unique
pA_chr8-30	ENSG00000178719.16	chr8	143993373	143993414	+	unique
pA_chr3-36	ENSG00000168268.10	chr3	52524379	52524420	-	unique
pA_chr10-21	ENSG00000138279.15	chr10	73375774	73375815	-	unique
pA_chr11-131	ENSG00000171202.6	chr11	85656495	85656536	+	unique
pA_chr20-27	ENSG00000101146.12	chr20	57378414	57378455	+	unique
pA_chr12-75	ENSG00000178449.8	chr12	50120403	50120444	+	unique
pA_chr17-316	ENSG00000183011.13	chr17	7856684	7856725	-	unique
pA_chr17-299	ENSG00000181038.13	chr17	76733834	76733875	+	unique
pA_chr6-172	ENSG00000118523.5	chr6	131948178	131948219	-	unique
pA_chr5-125	ENSG00000069011.15	chr5	135027734	135027775	-	unique
pA_chr16-79	ENSG00000168701.18	chr16	67229232	67229273	+	unique
pA_chr2-15	ENSG00000115756.12	chr2	10427560	10427601	+	unique
pA_chr9-49	ENSG00000119383.19	chr9	129148897	129148938	+	unique
pA_chr16-38	ENSG00000161981.10	chr16	57414	57455	+	unique
pA_chr1-210	ENSG00000117748.9	chr1	27891543	27891584	-	unique
pA_chr11-203	ENSG00000023191.16	chr11	494514	494555	-	unique
pA_chr14-20	ENSG00000100811.11	chr14	100278434	100278475	+	unique
pA_chr15-31	ENSG00000156642.16	chr15	73560013	73560054	-	unique
pA_chr3-106	ENSG00000114302.15	chr3	48746574	48746615	-	unique
pA_chr5-88	ENSG00000145907.14	chr5	151805314	151805355	+	unique
pA_chr5-164	ENSG00000129625.12	chr5	112878476	112878517	-	unique
pA_chr13-94	ENSG00000169508.6	chr13	99294533	99294574	-	unique
pA_chr1-669	ENSG00000183291.15	chr1	86862449	86862490	-	unique
pA_chr2-124	ENSG00000170144.19	chr2	177220089	177220130	+	unique
pA_chr5-120	ENSG00000170445.12	chr5	140673903	140673944	-	unique
pA_chr14-33	ENSG00000198732.10	chr14	70030585	70030626	+	unique
pA_chr2-221	ENSG00000076003.4	chr2	135840440	135840481	-	unique
pA_chr3-136	ENSG00000131368.7	chr3	15052209	15052250	-	unique
pA_chrX-52	ENSG00000130985.16	chrX	47215080	47215121	+	unique
pA_chr12-188	ENSG00000186298.11	chr12	110719903	110719944	-	unique
pA_chr6-156	ENSG00000111906.17	chr6	125275875	125275916	-	unique
pA_chr9-139	ENSG00000160563.13	chr9	131860111	131860152	-	unique
pA_chr16-102	ENSG00000007038.10	chr16	2821667	2821708	+	unique
pA_chr1-440	ENSG00000158195.10	chr1	27404232	27404273	-	unique
pA_chr10-129	ENSG00000108055.9	chr10	110604576	110604617	+	unique
pA_chr19-249	ENSG00000141985.9	chr19	4360382	4360423	-	unique
pA_chr22-67	ENSG00000128272.14	chr22	39522633	39522674	+	unique
pA_chr14-36	ENSG00000100836.10	chr14	23326129	23326170	+	unique
pA_chr17-104	ENSG00000181610.12	chr17	57839540	57839581	-	unique
pA_chr18-28	ENSG00000085415.15	chr18	12985675	12985716	+	unique
pA_chr20-70	ENSG00000124226.10	chr20	49953836	49953877	+	unique
pA_chr1-107	ENSG00000004455.16	chr1	33008881	33008922	-	unique
pA_chr2-28	ENSG00000136718.9	chr2	130346579	130346620	+	unique
pA_chr16-31	ENSG00000169180.11	chr16	28097994	28098035	-	unique
pA_chr19-62	ENSG00000267855.5	chr19	8311356	8311397	-	unique
pA_chr1-112	ENSG00000117411.16	chr1	43991122	43991163	+	unique
pA_chr9-292	ENSG00000119335.16	chr9	128695491	128695532	+	unique
pA_chr11-488	ENSG00000172922.8	chr11	65719683	65719724	-	unique
pA_chr17-271	ENSG00000006744.18	chr17	12992390	12992431	-	unique
pA_chr1-183	ENSG00000116741.7	chr1	192812231	192812272	+	unique
pA_chr10-138	ENSG00000107566.13	chr10	100150098	100150139	-	unique
pA_chr1-297	ENSG00000067334.13	chr1	93869773	93869814	-	unique
pA_chr16-117	ENSG00000103423.13	chr16	4456720	4456761	+	unique
pA_chr2-440	ENSG00000115091.11	chr2	113958212	113958253	+	unique
pA_chr8-54	ENSG00000104635.13	chr8	22422630	22422671	+	unique
pA_chrX-23	ENSG00000130741.10	chrX	24077430	24077471	+	unique
pA_chr11-290	ENSG00000150687.11	chr11	86811195	86811236	+	unique
pA_chr17-140	ENSG00000006125.16	chr17	35726366	35726407	+	unique
pA_chr2-99	ENSG00000115806.12	chr2	170966874	170966915	+	unique
pA_chr9-123	ENSG00000119414.11	chr9	125149128	125149169	-	unique
pA_chr11-73	ENSG00000110696.9	chr11	16755300	16755341	+	unique
pA_chr16-17	ENSG00000206053.12	chr16	1701384	1701425	+	unique
pA_chr17-80	ENSG00000276023.4	chr17	37513460	37513501	+	unique
pA_chr18-54	ENSG00000134049.4	chr18	47155035	47155076	-	unique
pA_chr19-110	ENSG00000085872.14	chr19	16517891	16517932	-	unique
pA_chr19-152	ENSG00000167461.11	chr19	16133577	16133618	+	unique
pA_chr9-21	ENSG00000119408.16	chr9	124351415	124351456	+	unique
pA_chr19-259	ENSG00000104872.10	chr19	49446297	49446338	-	unique
pA_chr1-309	ENSG00000117519.15	chr1	94896958	94896999	-	unique
pA_chr7-149	ENSG00000164548.10	chr7	23505012	23505053	-	unique
pA_chr12-53	ENSG00000111206.12	chr12	2857677	2857718	-	unique
pA_chr17-422	ENSG00000178307.9	chr17	21197950	21197991	-	unique
pA_chr1-318	ENSG00000143653.9	chr1	246767418	246767459	+	unique
pA_chr16-8	ENSG00000167526.13	chr16	89563244	89563285	+	unique
pA_chr17-499	ENSG00000091640.7	chr17	4959224	4959265	-	unique
pA_chr1-129	ENSG00000116209.11	chr1	54032013	54032054	-	unique
pA_chr3-98	ENSG00000113811.10	chr3	53885188	53885229	-	unique
pA_chr19-145	ENSG00000130382.8	chr19	6210380	6210421	-	unique
pA_chr2-231	ENSG00000116044.15	chr2	177230306	177230347	-	unique
pA_chr17-78	ENSG00000167721.10	chr17	2323988	2324029	-	unique
pA_chr17-175	ENSG00000197170.9	chr17	67340503	67340544	-	unique
pA_chr1-282	ENSG00000171492.14	chr1	89935957	89935998	+	unique
pA_chr17-64	ENSG00000141378.14	chr17	59697313	59697354	-	unique
pA_chr21-13	ENSG00000243927.5	chr21	34142987	34143028	+	unique
pA_chr5-227	ENSG00000085231.13	chr5	69351721	69351762	-	unique
pA_chr4-123	ENSG00000163110.14	chr4	94668178	94668219	+	unique
pA_chr6-166	ENSG00000066379.14	chr6	30064856	30064897	+	unique
pA_chr8-154	ENSG00000035681.7	chr8	58583511	58583552	-	unique
pA_chr3-93	ENSG00000075785.12	chr3	128814045	128814086	+	unique
pA_chr3-123	ENSG00000114450.9	chr3	179396084	179396125	-	unique
pA_chr16-58	ENSG00000184207.8	chr16	2213685	2213726	-	unique
pA_chr16-366	ENSG00000131153.8	chr16	85677672	85677713	-	unique
pA_chr7-60	ENSG00000006652.13	chr7	112475677	112475718	+	unique
pA_chr13-28	ENSG00000173141.4	chr13	21177318	21177359	+	unique
pA_chr3-110	ENSG00000114209.14	chr3	167683896	167683937	-	unique
pA_chr8-35	ENSG00000170791.17	chr8	56217438	56217479	+	unique
pA_chr7-76	ENSG00000196262.13	chr7	44803069	44803110	+	unique
pA_chr21-15	ENSG00000155304.5	chr21	14371115	14371156	-	unique
pA_chr1-247	ENSG00000173436.13	chr1	19626587	19626628	+	unique
pA_chr9-72	ENSG00000097007.17	chr9	130887633	130887674	+	unique
pA_chr17-331	ENSG00000109062.10	chr17	74769310	74769351	+	unique
pA_chr20-80	ENSG00000125870.10	chr20	16741172	16741213	+	unique
pA_chr1-325	ENSG00000143294.14	chr1	156800769	156800810	+	unique
pA_chr1-459	ENSG00000135821.17	chr1	182382895	182382936	-	unique
pA_chr7-171	ENSG00000091127.13	chr7	105456533	105456574	-	unique
pA_chr9-77	ENSG00000122140.10	chr9	135504626	135504667	+	unique
pA_chr16-158	ENSG00000153815.16	chr16	81711713	81711754	+	unique
pA_chr22-39	ENSG00000189306.10	chr22	42512559	42512600	-	unique
pA_chr17-325	ENSG00000131475.6	chr17	42779558	42779599	+	unique
pA_chr6-34	ENSG00000204220.10	chr6	33290883	33290924	+	unique
pA_chr9-155	ENSG00000095380.10	chr9	98083037	98083078	+	unique
pA_chr14-47	ENSG00000211448.11	chr14	80197529	80197570	-	unique
pA_chr1-179	ENSG00000011007.12	chr1	23759855	23759896	+	unique
pA_chr1-385	ENSG00000136628.17	chr1	219968593	219968634	-	unique
pA_chr3-121	ENSG00000114480.12	chr3	81489703	81489744	-	unique
pA_chr2-37	ENSG00000143977.13	chr2	70281373	70281414	-	unique
pA_chr5-274	ENSG00000113739.10	chr5	173317062	173317103	-	unique
pA_chr7-252	ENSG00000164898.12	chr7	139345750	139345791	+	unique
pA_chr9-47	ENSG00000148334.14	chr9	128120702	128120743	-	unique
pA_chr6-40	ENSG00000227057.8	chr6	33279104	33279145	-	unique
pA_chr12-37	ENSG00000123353.9	chr12	55820424	55820465	+	unique
pA_chr19-409	ENSG00000141934.9	chr19	281046	281087	-	unique
pA_chr22-46	ENSG00000099956.18	chr22	23834467	23834508	+	unique
pA_chr4-19	ENSG00000127418.14	chr4	1026842	1026883	+	unique
pA_chr6-76	ENSG00000112245.9	chr6	63582384	63582425	+	unique
pA_chr16-237	ENSG00000198931.10	chr16	88809469	88809510	-	unique
pA_chr17-115	ENSG00000128422.15	chr17	41619455	41619496	-	unique
pA_chr5-148	ENSG00000113360.16	chr5	31401302	31401343	-	unique
pA_chr12-138	ENSG00000006831.9	chr12	1788630	1788671	+	unique
pA_chr3-122	ENSG00000073111.13	chr3	127622393	127622434	+	unique
pA_chr17-39	ENSG00000168259.14	chr17	41976443	41976484	-	unique
pA_chr1-150	ENSG00000154380.17	chr1	225494805	225494846	-	unique
pA_chr9-92	ENSG00000135052.16	chr9	86026141	86026182	-	unique
pA_chr17-522	ENSG00000188612.11	chr17	75168144	75168185	-	unique
pA_chr5-140	ENSG00000131508.15	chr5	139627646	139627687	+	unique
pA_chr7-78	ENSG00000106609.16	chr7	66956112	66956153	+	unique
pA_chr5-163	ENSG00000173221.13	chr5	95813983	95814024	-	unique
pA_chr12-82	ENSG00000167552.13	chr12	49184797	49184838	-	unique
pA_chr14-117	ENSG00000092199.17	chr14	21210930	21210971	-	unique
pA_chr1-350	ENSG00000163875.15	chr1	37493299	37493340	-	unique
pA_chr2-203	ENSG00000115350.11	chr2	74969684	74969725	+	unique
pA_chr5-95	ENSG00000174695.9	chr5	83056664	83056705	-	unique
pA_chr12-208	ENSG00000177425.10	chr12	79587789	79587830	-	unique
pA_chr2-179	ENSG00000155438.11	chr2	121727685	121727726	-	unique
pA_chr10-141	ENSG00000107959.15	chr10	3137730	3137771	-	unique
pA_chr11-107	ENSG00000173486.12	chr11	64244078	64244119	+	unique
pA_chr6-110	ENSG00000124802.11	chr6	8079603	8079644	-	unique
pA_chr6-115	ENSG00000124535.15	chr6	2785701	2785742	+	unique
pA_chr14-99	ENSG00000078304.19	chr14	101912579	101912620	+	unique
pA_chr19-255	ENSG00000130522.5	chr19	18279766	18279807	-	unique
pA_chr22-63	ENSG00000070010.18	chr22	19450621	19450662	-	unique
pA_chr8-79	ENSG00000120963.11	chr8	101198931	101198972	-	unique
pA_chr19-162	ENSG00000129351.17	chr19	10685718	10685759	+	unique
pA_chr1-371	ENSG00000011009.10	chr1	23795495	23795536	+	unique
pA_chr4-71	ENSG00000138750.14	chr4	76114662	76114703	-	unique
pA_chr5-96	ENSG00000134970.13	chr5	115613510	115613551	-	unique
pA_chr12-148	ENSG00000061794.12	chr12	27756254	27756295	+	unique
pA_chr19-59	ENSG00000099341.11	chr19	38383781	38383822	+	unique
pA_chrX-84	ENSG00000102158.19	chrX	77826365	77826406	-	unique
pA_chr9-56	ENSG00000086061.15	chr9	33039270	33039311	+	unique
pA_chr11-11	ENSG00000149591.16	chr11	117204752	117204793	+	unique
pA_chrX-47	ENSG00000204272.12	chrX	56817532	56817573	+	unique
pA_chrX-42	ENSG00000160131.13	chrX	151405111	151405152	+	unique
pA_chr19-69	ENSG00000105258.8	chr19	36113708	36113749	-	unique
pA_chr20-62	ENSG00000101335.9	chr20	36549778	36549819	+	unique
pA_chr11-132	ENSG00000110172.11	chr11	90201452	90201493	-	unique
pA_chr19-52	ENSG00000125656.8	chr19	6368857	6368898	+	unique
pA_chr19-98	ENSG00000160113.5	chr19	17231885	17231926	-	unique
pA_chrX-129	ENSG00000130066.16	chrX	23786165	23786206	+	unique
pA_chr7-101	ENSG00000086232.12	chr7	6023828	6023869	-	unique
pA_chr10-93	ENSG00000168283.13	chr10	22331024	22331065	+	unique
pA_chr1-87	ENSG00000160818.16	chr1	156594496	156594537	-	unique
pA_chr2-158	ENSG00000128654.13	chr2	176337897	176337938	+	unique
pA_chr12-100	ENSG00000134283.17	chr12	42441913	42441954	+	unique
pA_chr1-729	ENSG00000160714.9	chr1	154549992	154550033	-	unique
pA_chr1-481	ENSG00000160789.19	chr1	156137821	156137862	+	unique
pA_chr4-207	ENSG00000138674.16	chr4	82818661	82818702	-	unique
pA_chr6-123	ENSG00000025796.13	chr6	107870764	107870805	-	unique
pA_chr19-81	ENSG00000104852.14	chr19	49108560	49108601	+	unique
pA_chr1-89	ENSG00000143811.17	chr1	225919884	225919925	-	unique
pA_chr2-301	ENSG00000175701.10	chr2	110211525	110211566	-	unique
pA_chr10-29	ENSG00000107937.18	chr10	1017655	1017696	+	unique
pA_chr12-256	ENSG00000196498.13	chr12	124324416	124324457	-	unique
pA_chr1-266	ENSG00000137936.16	chr1	93561790	93561831	-	unique
pA_chr8-93	ENSG00000253729.7	chr8	47773111	47773152	-	unique
pA_chr12-111	ENSG00000067182.7	chr12	6328767	6328808	-	unique
pA_chr19-181	ENSG00000105171.9	chr19	29615744	29615785	+	unique
pA_chr19-73	ENSG00000089327.14	chr19	35169833	35169874	+	unique
pA_chr1-111	ENSG00000174574.15	chr1	39005847	39005888	+	unique
pA_chr6-249	ENSG00000123505.15	chr6	110895666	110895707	+	unique
pA_chr7-35	ENSG00000129103.17	chr7	56080620	56080661	+	unique
pA_chr1-323	ENSG00000117519.15	chr1	94897205	94897246	-	unique
pA_chr13-11	ENSG00000120697.8	chr13	36949843	36949884	-	unique
pA_chrX-45	ENSG00000004961.14	chrX	11121829	11121870	+	unique
pA_chrX-104	ENSG00000130741.10	chrX	24077922	24077963	+	unique
pA_chr3-107	ENSG00000196776.14	chr3	108047066	108047107	-	unique
pA_chr4-115	ENSG00000145293.15	chr4	82461044	82461085	+	unique
pA_chr19-248	ENSG00000126934.13	chr19	4090323	4090364	-	unique
pA_chr22-72	ENSG00000100201.19	chr22	38483439	38483480	-	unique
pA_chr1-38	ENSG00000031698.12	chr1	109238096	109238137	+	unique
pA_chr2-126	ENSG00000116120.9	chr2	222571743	222571784	-	unique
pA_chr1-233	ENSG00000162889.10	chr1	206734232	206734273	+	unique
pA_chr9-75	ENSG00000148335.14	chr9	129635555	129635596	+	unique
pA_chr19-455	ENSG00000257103.8	chr19	34228050	34228091	+	unique
pA_chr4-103	ENSG00000138758.11	chr4	77038563	77038604	+	unique
pA_chr5-216	ENSG00000168938.5	chr5	123023378	123023419	-	unique
pA_chr6-174	ENSG00000198818.9	chr6	166319745	166319786	-	unique
pA_chr7-97	ENSG00000106366.8	chr7	101139196	101139237	+	unique
pA_chr9-116	ENSG00000165271.16	chr9	33461448	33461489	-	unique
pA_chr10-71	ENSG00000138180.15	chr10	93529044	93529085	+	unique
pA_chr14-261	ENSG00000142208.15	chr14	104769349	104769390	-	unique
pA_chr1-471	ENSG00000117751.17	chr1	27851493	27851534	+	unique
pA_chr1-139	ENSG00000197780.9	chr1	109062496	109062537	-	unique
pA_chr6-60	ENSG00000214113.10	chr6	5109060	5109101	-	unique
pA_chr14-30	ENSG00000182512.4	chr14	95544564	95544605	+	unique
pA_chr15-39	ENSG00000181991.15	chr15	88478221	88478262	+	unique
pA_chr19-183	ENSG00000011422.11	chr19	43648584	43648625	-	unique
pA_chr3-94	ENSG00000177311.11	chr3	141448649	141448690	+	unique
pA_chr5-193	ENSG00000177733.6	chr5	137751573	137751614	-	unique
pA_chr17-192	ENSG00000131470.14	chr17	42572316	42572357	-	unique
pA_chr6-214	ENSG00000180537.12	chr6	13979963	13980004	+	unique
pA_chr15-143	ENSG00000103769.9	chr15	65888037	65888078	+	unique
pA_chr19-121	ENSG00000130255.12	chr19	5691828	5691869	+	unique
pA_chr3-47	ENSG00000114491.13	chr3	124744241	124744282	+	unique
pA_chr5-206	ENSG00000170584.10	chr5	163453575	163453616	-	unique
pA_chr10-267	ENSG00000065154.11	chr10	124397306	124397347	-	unique
pA_chr12-78	ENSG00000111652.9	chr12	6731821	6731862	+	unique
pA_chr13-147	ENSG00000130177.14	chr13	114272634	114272675	+	unique
pA_chr19-159	ENSG00000167461.11	chr19	16133490	16133531	+	unique
pA_chr2-177	ENSG00000171055.14	chr2	36552253	36552294	-	unique
pA_chr7-208	ENSG00000106609.16	chr7	66958505	66958546	+	unique
pA_chr8-61	ENSG00000104723.20	chr8	15764442	15764483	+	unique
pA_chr12-225	ENSG00000152556.15	chr12	48146060	48146101	+	unique
pA_chr15-65	ENSG00000104164.10	chr15	45609663	45609704	+	unique
pA_chr19-167	ENSG00000088247.16	chr19	6413647	6413688	-	unique
pA_chr1-324	ENSG00000143401.14	chr1	150220375	150220416	-	unique
pA_chr3-67	ENSG00000175193.12	chr3	183829390	183829431	-	unique
pA_chr3-74	ENSG00000133657.14	chr3	194402675	194402716	-	unique
pA_chr9-50	ENSG00000148248.13	chr9	133362338	133362379	-	unique
pA_chr1-114	ENSG00000023909.9	chr1	93888451	93888492	-	unique
pA_chr1-95	ENSG00000120333.4	chr1	175014407	175014448	-	unique
pA_chr1-269	ENSG00000143753.12	chr1	224193391	224193432	+	unique
pA_chr3-68	ENSG00000171135.13	chr3	9893805	9893846	+	unique
pA_chr16-89	ENSG00000217555.12	chr16	66566022	66566063	+	unique
pA_chr18-17	ENSG00000085415.15	chr18	12987486	12987527	+	unique
pA_chr19-74	ENSG00000105221.16	chr19	40232330	40232371	-	unique
pA_chr3-54	ENSG00000114023.15	chr3	122409953	122409994	+	unique
pA_chr12-134	ENSG00000111641.11	chr12	6556880	6556921	-	unique
pA_chr19-357	ENSG00000161091.12	chr19	3544212	3544253	-	unique
pA_chr1-691	ENSG00000143486.15	chr1	206591652	206591693	-	unique
pA_chr16-50	ENSG00000131652.13	chr16	3027707	3027748	+	unique
pA_chr8-27	ENSG00000187840.4	chr8	38060324	38060365	+	unique
pA_chr8-47	ENSG00000104388.14	chr8	60621954	60621995	+	unique
pA_chr14-187	ENSG00000165501.16	chr14	49614633	49614674	+	unique
pA_chr16-64	ENSG00000166451.13	chr16	81022834	81022875	+	unique
pA_chr20-120	ENSG00000101189.6	chr20	62800533	62800574	+	unique
pA_chr1-340	ENSG00000189171.14	chr1	153618797	153618838	-	unique
pA_chr2-59	ENSG00000176946.11	chr2	241584417	241584458	-	unique
pA_chr5-73	ENSG00000164466.12	chr5	175528569	175528610	+	unique
pA_chr12-72	ENSG00000181929.11	chr12	49002278	49002319	-	unique
pA_chr20-112	ENSG00000214078.12	chr20	35626038	35626079	-	unique
pA_chr1-64	ENSG00000143418.19	chr1	150965248	150965289	-	unique
pA_chr14-78	ENSG00000100522.8	chr14	52775184	52775225	-	unique
pA_chr20-116	ENSG00000101361.15	chr20	2658344	2658385	+	unique
pA_chr3-236	ENSG00000163528.12	chr3	14112082	14112123	-	unique
pA_chr22-28	ENSG00000099995.18	chr22	30334177	30334218	-	unique
pA_chr6-81	ENSG00000120265.16	chr6	149811370	149811411	+	unique
pA_chr12-64	ENSG00000256537.4	chr12	11172231	11172272	+	unique
pA_chrX-16	ENSG00000102316.16	chrX	54815968	54816009	+	unique
pA_chr3-226	ENSG00000181789.14	chr3	129277723	129277764	+	unique
pA_chr7-349	ENSG00000122566.20	chr7	26190115	26190156	-	unique
pA_chr17-401	ENSG00000108588.13	chr17	63745253	63745294	-	unique
pA_chr1-271	ENSG00000160087.20	chr1	1254900	1254941	-	unique
pA_chr10-121	ENSG00000151929.9	chr10	119677761	119677802	+	unique
pA_chr11-185	ENSG00000110536.13	chr11	47571769	47571810	+	unique
pA_chr11-225	ENSG00000095139.13	chr11	118602886	118602927	+	unique
pA_chr12-59	ENSG00000123395.14	chr12	52077447	52077488	+	unique
pA_chr12-106	ENSG00000139546.10	chr12	53506384	53506425	+	unique
pA_chr22-12	ENSG00000100220.11	chr22	32387587	32387628	-	unique
pA_chr22-121	ENSG00000100364.18	chr22	45195824	45195865	-	unique
pA_chr1-435	ENSG00000055070.16	chr1	16398093	16398134	+	unique
pA_chr6-138	ENSG00000120265.16	chr6	149802485	149802526	+	unique
pA_chr6-86	ENSG00000112029.9	chr6	152970525	152970566	-	unique
pA_chr8-52	ENSG00000104408.9	chr8	108201734	108201775	-	unique
pA_chr2-263	ENSG00000132305.20	chr2	86143930	86143971	-	unique
pA_chr16-160	ENSG00000065054.13	chr16	2038433	2038474	+	unique
pA_chr4-21	ENSG00000090316.15	chr4	1340077	1340118	+	unique
pA_chr5-29	ENSG00000213523.10	chr5	140550488	140550529	-	unique
pA_chr12-98	ENSG00000151131.10	chr12	104994679	104994720	+	unique
pA_chr7-43	ENSG00000049541.10	chr7	74231665	74231706	-	unique
pA_chr9-82	ENSG00000106992.17	chr9	127867832	127867873	-	unique
pA_chr13-53	ENSG00000120699.12	chr13	37009348	37009389	+	unique
pA_chr4-62	ENSG00000109519.12	chr4	7060062	7060103	-	unique
pA_chr8-45	ENSG00000182307.12	chr8	145054380	145054421	+	unique
pA_chr15-30	ENSG00000137804.12	chr15	41380999	41381040	+	unique
pA_chr1-268	ENSG00000134375.10	chr1	201969901	201969942	+	unique
pA_chr3-46	ENSG00000114251.13	chr3	55467587	55467628	-	unique
pA_chr5-79	ENSG00000164151.11	chr5	5490179	5490220	+	unique
pA_chr5-66	ENSG00000152684.10	chr5	52801998	52802039	+	unique
pA_chr17-88	ENSG00000035862.12	chr17	78852981	78853022	-	unique
pA_chr19-317	ENSG00000198356.11	chr19	12748283	12748324	+	unique
pA_chrX-72	ENSG00000196976.7	chrX	154477774	154477815	-	unique
pA_chr1-365	ENSG00000130764.9	chr1	3780222	3780263	-	unique
pA_chr5-89	ENSG00000037241.7	chr5	172969680	172969721	+	unique
pA_chr15-55	ENSG00000166200.14	chr15	49127347	49127388	-	unique
pA_chr15-34	ENSG00000140262.17	chr15	57288477	57288518	+	unique
pA_chr1-292	ENSG00000116688.16	chr1	12013464	12013505	+	unique
pA_chr1-77	ENSG00000116455.13	chr1	111440260	111440301	-	unique
pA_chr1-574	ENSG00000173726.10	chr1	235111830	235111871	-	unique
pA_chr12-171	ENSG00000111667.13	chr12	6866581	6866622	+	unique
pA_chr12-189	ENSG00000150977.10	chr12	123415388	123415429	-	unique
pA_chr2-422	ENSG00000143870.12	chr2	10783388	10783429	-	unique
pA_chr10-150	ENSG00000171311.12	chr10	97436238	97436279	-	unique
pA_chr5-149	ENSG00000113569.15	chr5	37288119	37288160	-	unique
pA_chr12-128	ENSG00000010278.12	chr12	6238217	6238258	+	unique
pA_chr17-217	ENSG00000072849.10	chr17	5474279	5474320	-	unique
pA_chr20-158	ENSG00000124214.19	chr20	49113533	49113574	-	unique
pA_chr1-100	ENSG00000173726.10	chr1	235111585	235111626	-	unique
pA_chr3-15	ENSG00000163527.9	chr3	31637568	31637609	+	unique
pA_chr11-390	ENSG00000186660.14	chr11	58620915	58620956	+	unique
pA_chr11-277	ENSG00000042429.10	chr11	93812359	93812400	+	unique
pA_chr17-338	ENSG00000275700.4	chr17	37056825	37056866	+	unique
pA_chr19-237	ENSG00000105197.10	chr19	39489874	39489915	+	unique
pA_chr5-137	ENSG00000049860.13	chr5	74721244	74721285	+	unique
pA_chr10-36	ENSG00000148841.15	chr10	104312138	104312179	-	unique
pA_chr15-138	ENSG00000140319.10	chr15	40036055	40036096	-	unique
pA_chr22-68	ENSG00000198355.4	chr22	49964032	49964073	+	unique
pA_chr6-126	ENSG00000137331.11	chr6	30743197	30743238	-	unique
pA_chr11-59	ENSG00000214753.2	chr11	62714752	62714793	-	unique
pA_chr14-58	ENSG00000089737.15	chr14	94050920	94050961	-	unique
pA_chr15-61	ENSG00000064726.9	chr15	83016426	83016467	-	unique
pA_chr22-92	ENSG00000100225.17	chr22	32498781	32498822	+	unique
pA_chr2-116	ENSG00000124831.18	chr2	237765870	237765911	+	unique
pA_chr10-182	ENSG00000119986.6	chr10	97677424	97677465	-	unique
pA_chr13-132	ENSG00000120686.11	chr13	38362961	38363002	+	unique
pA_chr13-44	ENSG00000204899.5	chr13	72708373	72708414	-	unique
pA_chr16-78	ENSG00000140750.16	chr16	24919391	24919432	-	unique
pA_chr17-151	ENSG00000182628.12	chr17	59111849	59111890	-	unique
pA_chr19-131	ENSG00000105669.13	chr19	18899524	18899565	-	unique
pA_chr1-244	ENSG00000117335.19	chr1	207795462	207795503	+	unique
pA_chr3-104	ENSG00000170876.7	chr3	14143638	14143679	+	unique
pA_chr17-144	ENSG00000169718.17	chr17	82057880	82057921	-	unique
pA_chr19-290	ENSG00000105341.18	chr19	41431316	41431357	-	unique
pA_chr7-57	ENSG00000033050.7	chr7	151213503	151213544	-	unique
pA_chr15-83	ENSG00000140157.14	chr15	22867677	22867718	+	unique
pA_chr17-436	ENSG00000108592.16	chr17	63819431	63819472	-	unique
pA_chr5-126	ENSG00000169223.14	chr5	177331955	177331996	-	unique
pA_chr6-124	ENSG00000135521.8	chr6	143863762	143863803	+	unique
pA_chr7-106	ENSG00000239789.5	chr7	55955298	55955339	+	unique
pA_chr17-22	ENSG00000136448.11	chr17	45105944	45105985	+	unique
pA_chr19-264	ENSG00000130165.10	chr19	11553042	11553083	-	unique
pA_chrX-57	ENSG00000169446.5	chrX	135962073	135962114	-	unique
pA_chr3-27	ENSG00000168028.13	chr3	39412397	39412438	+	unique
pA_chr11-150	ENSG00000185475.9	chr11	62790185	62790226	+	unique
pA_chr13-78	ENSG00000139684.13	chr13	46771248	46771289	-	unique
pA_chr19-65	ENSG00000160633.12	chr19	5668427	5668468	+	unique
pA_chr21-9	ENSG00000159128.14	chr21	33437470	33437511	+	unique
pA_chr6-210	ENSG00000130024.14	chr6	169703903	169703944	-	unique
pA_chr7-275	ENSG00000106546.12	chr7	17345722	17345763	+	unique
pA_chr9-42	ENSG00000238227.7	chr9	136114583	136114624	-	unique
pA_chr19-154	ENSG00000011485.14	chr19	46390799	46390840	+	unique
pA_chr19-61	ENSG00000105402.7	chr19	47487635	47487676	-	unique
pA_chr19-226	ENSG00000130724.8	chr19	58551561	58551602	-	unique
pA_chr1-343	ENSG00000116918.13	chr1	231566478	231566519	+	unique
pA_chr6-104	ENSG00000112578.9	chr6	41933000	41933041	+	unique
pA_chr10-98	ENSG00000099194.5	chr10	100364783	100364824	+	unique
pA_chr12-104	ENSG00000135451.12	chr12	49324343	49324384	+	unique
pA_chr14-118	ENSG00000092010.14	chr14	24138912	24138953	+	unique
pA_chr19-191	ENSG00000167491.17	chr19	19506936	19506977	+	unique
pA_chr4-259	ENSG00000197894.10	chr4	99072143	99072184	-	unique
pA_chr6-366	ENSG00000124702.17	chr6	43021248	43021289	+	unique
pA_chr9-70	ENSG00000066697.14	chr9	100451187	100451228	+	unique
pA_chr10-123	ENSG00000148444.15	chr10	22320265	22320306	+	unique
pA_chr19-92	ENSG00000104915.14	chr19	13144061	13144102	-	unique
pA_chr2-436	ENSG00000144029.11	chr2	95087206	95087247	-	unique
pA_chr3-82	ENSG00000075785.12	chr3	128814750	128814791	+	unique
pA_chr4-78	ENSG00000163950.12	chr4	1692804	1692845	-	unique
pA_chr8-89	ENSG00000178896.7	chr8	144080595	144080636	+	unique
pA_chr9-140	ENSG00000165119.19	chr9	83968083	83968124	-	unique
pA_chr13-17	ENSG00000139842.14	chr13	113265017	113265058	+	unique
pA_chr19-102	ENSG00000125912.10	chr19	3209527	3209568	+	unique
pA_chr2-73	ENSG00000168542.13	chr2	189012001	189012042	+	unique
pA_chr2-141	ENSG00000130508.10	chr2	1631884	1631925	-	unique
pA_chr3-465	ENSG00000163923.9	chr3	187120954	187120995	-	unique
pA_chr6-97	ENSG00000197498.12	chr6	111025548	111025589	+	unique
pA_chr12-120	ENSG00000132341.11	chr12	130877618	130877659	+	unique
pA_chr17-117	ENSG00000126581.12	chr17	42810132	42810173	-	unique
pA_chr1-212	ENSG00000116171.16	chr1	53051561	53051602	+	unique
pA_chr8-117	ENSG00000221869.4	chr8	47736915	47736956	-	unique
pA_chr10-117	ENSG00000150093.18	chr10	32900392	32900433	-	unique
pA_chr11-205	ENSG00000166326.6	chr11	35811005	35811046	+	unique
pA_chr1-272	ENSG00000197785.13	chr1	1534640	1534681	+	unique
pA_chr1-207	ENSG00000078369.17	chr1	1786745	1786786	-	unique
pA_chr5-100	ENSG00000172262.11	chr5	43176204	43176245	+	unique
pA_chr7-71	ENSG00000243317.7	chr7	135675124	135675165	+	unique
pA_chr17-313	ENSG00000179409.10	chr17	744629	744670	-	unique
pA_chr19-108	ENSG00000105063.18	chr19	55229780	55229821	-	unique
pA_chr15-97	ENSG00000140367.11	chr15	75901011	75901052	+	unique
pA_chr17-60	ENSG00000131467.10	chr17	42841677	42841718	+	unique
pA_chr1-91	ENSG00000157916.19	chr1	2403721	2403762	+	unique
pA_chr12-222	ENSG00000179195.15	chr12	124015391	124015432	+	unique
pA_chr1-455	ENSG00000160789.19	chr1	156140042	156140083	+	unique
pA_chr9-57	ENSG00000165280.15	chr9	35056914	35056955	-	unique
pA_chr10-181	ENSG00000077147.14	chr10	96520977	96521018	-	unique
pA_chr11-74	ENSG00000049449.8	chr11	32105495	32105536	+	unique
pA_chr2-53	ENSG00000144524.17	chr2	231808673	231808714	+	unique
pA_chr7-74	ENSG00000130305.16	chr7	73303229	73303270	-	unique
pA_chr7-202	ENSG00000075223.13	chr7	80742539	80742580	-	unique
pA_chr7-70	ENSG00000105810.9	chr7	92605032	92605073	-	unique
pA_chr7-144	ENSG00000135249.7	chr7	105567633	105567674	+	unique
pA_chr19-189	ENSG00000141867.17	chr19	15236852	15236893	-	unique
pA_chr9-65	ENSG00000107341.4	chr9	33917945	33917986	+	unique
pA_chr10-47	ENSG00000136758.18	chr10	27110460	27110501	-	unique
pA_chr17-91	ENSG00000109084.13	chr17	28328178	28328219	+	unique
pA_chr17-82	ENSG00000141698.16	chr17	41825203	41825244	-	unique
pA_chr17-269	ENSG00000129195.15	chr17	6451014	6451055	+	unique
pA_chr19-245	ENSG00000142409.5	chr19	56087368	56087409	-	unique
pA_chr3-171	ENSG00000174953.13	chr3	154275677	154275718	-	unique
pA_chr5-158	ENSG00000083312.17	chr5	72910281	72910322	+	unique
pA_chr7-217	ENSG00000164818.15	chr7	786436	786477	+	unique
pA_chr3-124	ENSG00000114503.10	chr3	196935403	196935444	-	unique
pA_chr9-118	ENSG00000188938.15	chr9	93446503	93446544	-	unique
pA_chr1-157	ENSG00000116237.15	chr1	6223494	6223535	-	unique
pA_chr6-144	ENSG00000120437.8	chr6	159779014	159779055	+	unique
pA_chr16-128	ENSG00000167978.16	chr16	2771365	2771406	+	unique
pA_chr19-78	ENSG00000071626.16	chr19	1435636	1435677	+	unique
pA_chr19-165	ENSG00000167747.13	chr19	50797698	50797739	-	unique
pA_chr22-21	ENSG00000069998.12	chr22	17137524	17137565	-	unique
pA_chr2-319	ENSG00000065911.11	chr2	74215026	74215067	+	unique
pA_chr2-74	ENSG00000036257.12	chr2	224473918	224473959	-	unique
pA_chr6-202	ENSG00000111897.6	chr6	122443350	122443391	-	unique
pA_chr16-92	ENSG00000085721.12	chr16	15060027	15060068	-	unique
pA_chr2-192	ENSG00000162972.10	chr2	199964070	199964111	+	unique
pA_chr8-261	ENSG00000104472.9	chr8	140516658	140516699	+	unique
pA_chr19-132	ENSG00000065000.15	chr19	2100990	2101031	-	unique
pA_chr20-91	ENSG00000131051.21	chr20	35703609	35703650	-	unique
pA_chr4-124	ENSG00000129187.14	chr4	182890097	182890138	-	unique
pA_chr7-94	ENSG00000159840.15	chr7	143391058	143391099	+	unique
pA_chr3-292	ENSG00000131389.16	chr3	14489299	14489340	+	unique
pA_chr3-324	ENSG00000187118.12	chr3	28319734	28319775	+	unique
pA_chr12-25	ENSG00000135446.16	chr12	57748242	57748283	-	unique
pA_chr16-47	ENSG00000130731.15	chr16	634423	634464	-	unique
pA_chr19-57	ENSG00000063245.14	chr19	55695719	55695760	+	unique
pA_chr18-26	ENSG00000101608.12	chr18	3256091	3256132	+	unique
pA_chrX-153	ENSG00000133142.17	chrX	103587470	103587511	+	unique
pA_chr2-98	ENSG00000136536.14	chr2	159768530	159768571	+	unique
pA_chr11-244	ENSG00000110092.3	chr11	69654427	69654468	+	unique
pA_chr1-288	ENSG00000158864.12	chr1	161214352	161214393	+	unique
pA_chr1-234	ENSG00000143499.13	chr1	214337086	214337127	+	unique
pA_chr9-83	ENSG00000167112.9	chr9	128309112	128309153	-	unique
pA_chr14-45	ENSG00000100664.10	chr14	103341313	103341354	+	unique
pA_chr2-119	ENSG00000077380.15	chr2	171748371	171748412	+	unique
pA_chr5-93	ENSG00000145623.12	chr5	38935587	38935628	+	unique
pA_chr19-83	ENSG00000167815.11	chr19	12796826	12796867	-	unique
pA_chr2-108	ENSG00000023228.13	chr2	206123900	206123941	-	unique
pA_chr2-115	ENSG00000135900.3	chr2	223967664	223967705	+	unique
pA_chr5-416	ENSG00000120306.9	chr5	140243741	140243782	+	unique
pA_chr12-150	ENSG00000139146.13	chr12	31280577	31280618	-	unique
pA_chr1-188	ENSG00000117448.13	chr1	45570002	45570043	+	unique
pA_chr2-93	ENSG00000136717.14	chr2	127048041	127048082	-	unique
pA_chr6-94	ENSG00000146374.13	chr6	127196996	127197037	+	unique
pA_chr17-292	ENSG00000132581.9	chr17	28648594	28648635	-	unique
pA_chr20-111	ENSG00000125991.18	chr20	35557589	35557630	+	unique
pA_chr1-177	ENSG00000116906.11	chr1	231277747	231277788	+	unique
pA_chr5-155	ENSG00000133706.17	chr5	146113903	146113944	-	unique
pA_chr20-25	ENSG00000101182.14	chr20	62136817	62136858	-	unique
pA_chr19-95	ENSG00000105618.13	chr19	54131669	54131710	+	unique
pA_chr1-172	ENSG00000126067.11	chr1	35601824	35601865	-	unique
pA_chr1-780	ENSG00000085491.15	chr1	108134823	108134864	-	unique
pA_chr5-350	ENSG00000134056.11	chr5	69229423	69229464	+	unique
pA_chr7-26	ENSG00000274523.4	chr7	75042175	75042216	-	unique
pA_chr12-365	ENSG00000139112.10	chr12	10223091	10223132	+	unique
pA_chr17-61	ENSG00000108588.13	chr17	63746405	63746446	-	unique
pA_chr20-110	ENSG00000125970.11	chr20	34080223	34080264	+	unique
pA_chr5-322	ENSG00000132356.11	chr5	40759826	40759867	-	unique
pA_chr9-224	ENSG00000099810.18	chr9	21863244	21863285	+	unique
pA_chr12-155	ENSG00000110880.10	chr12	108646567	108646608	-	unique
pA_chr14-79	ENSG00000168175.14	chr14	55066154	55066195	+	unique
pA_chr1-232	ENSG00000073756.11	chr1	186671827	186671868	-	unique
pA_chr2-399	ENSG00000185414.19	chr2	99197396	99197437	+	unique
pA_chr7-169	ENSG00000105825.11	chr7	93886554	93886595	-	unique
pA_chr7-113	ENSG00000188186.10	chr7	100154155	100154196	+	unique
pA_chr17-28	ENSG00000125445.10	chr17	75266021	75266062	+	unique
pA_chr22-51	ENSG00000187051.8	chr22	39529094	39529135	-	unique
pA_chr22-16	ENSG00000198792.12	chr22	38219307	38219348	-	unique
pA_chr2-62	ENSG00000115364.13	chr2	75655693	75655734	+	unique
pA_chr5-167	ENSG00000113552.15	chr5	142000664	142000705	-	unique
pA_chr9-184	ENSG00000186193.8	chr9	137062122	137062163	-	unique
pA_chr14-130	ENSG00000129559.12	chr14	24216854	24216895	-	unique
pA_chr1-656	ENSG00000183726.10	chr1	25360946	25360987	+	unique
pA_chr1-416	ENSG00000162377.5	chr1	52684444	52684485	-	unique
pA_chr14-68	ENSG00000029364.11	chr14	69462336	69462377	+	unique
pA_chr6-106	ENSG00000135316.17	chr6	85614217	85614258	-	unique
pA_chr8-66	ENSG00000168615.11	chr8	39104951	39104992	+	unique
pA_chr12-83	ENSG00000135441.7	chr12	55719654	55719695	+	unique
pA_chr16-56	ENSG00000169189.16	chr16	27224998	27225039	-	unique
pA_chr11-140	ENSG00000173465.7	chr11	65571723	65571764	+	unique
pA_chr1-583	ENSG00000057757.9	chr1	23788184	23788225	+	unique
pA_chr4-90	ENSG00000138821.12	chr4	102261677	102261718	-	unique
pA_chr6-101	ENSG00000093144.18	chr6	127289773	127289814	-	unique
pA_chr8-332	ENSG00000198363.16	chr8	61501229	61501270	-	unique
pA_chr17-129	ENSG00000007168.12	chr17	2685558	2685599	+	unique
pA_chrX-87	ENSG00000131174.4	chrX	77905339	77905380	+	unique
pA_chr2-89	ENSG00000171865.9	chr2	3545574	3545615	-	unique
pA_chr2-286	ENSG00000035141.7	chr2	70295983	70296024	-	unique
pA_chr4-57	ENSG00000013810.18	chr4	1745124	1745165	+	unique
pA_chr10-35	ENSG00000108179.13	chr10	79355290	79355331	+	unique
[truncated: 21,110 more rows]
